# Supplementary material for: Electrical stimulation shifts healing/scarring towards regeneration in a rat limb amputation model
Source: Sci Rep. 2019 Aug 7;9:11433. doi: 10.1038/s41598-019-47389-w (PMC6685943; doi:10.1038/s41598-019-47389-w)
Supplement: Supplementary file 2 — Supplementary Table S1 [file 41598_2019_47389_MOESM2_ESM.xlsx]

## Sheet: S_vs_E.up_in_E.GENES
EnsemblID	logFC	logCPM	PValue	FDR	GeneName	Description
ENSRNOG00000042547	5.32421	3.48959	6.78171e-20	1.56991e-17	RGD1565566	similar to 60S ribosomal protein L18a [Source:RGD Symbol;Acc:1565566]
ENSRNOG00000048273	4.14347	7.59999	2.09579e-06	6.35724e-05	Apod	apolipoprotein D [Source:RGD Symbol;Acc:2137]
ENSRNOG00000018748	3.76315	1.12453	1.45707e-12	1.33242e-10	Slc16a11	solute carrier family 16, member 11 [Source:RGD Symbol;Acc:1311125]
ENSRNOG00000002154	3.75036	2.94668	1.6346e-16	2.30479e-14	Mepe	matrix extracellular phosphoglycoprotein [Source:RGD Symbol;Acc:71036]
ENSRNOG00000061358	3.43251	-0.579178	4.80129e-05	0.000911322	AC129365.1
ENSRNOG00000008478	3.42263	8.62223	5.07539e-34	9.30318e-31	Mmp13	matrix metallopeptidase 13 [Source:RGD Symbol;Acc:620196]
ENSRNOG00000002167	3.17006	5.13812	1.77049e-12	1.5998e-10	Dmp1	dentin matrix acidic phosphoprotein 1 [Source:RGD Symbol;Acc:2508]
ENSRNOG00000061359	3.16942	0.498667	4.96622e-09	2.68867e-07	Psme1-ps1	proteasome (prosome, macropain) activator subunit 1 (PA28 alpha), pseudogene 1 [Source:RGD Symbol;Acc:1597686]
ENSRNOG00000038132	3.1479	1.61845	1.11773e-11	9.13477e-10	Vsig4	V-set and immunoglobulin domain containing 4 [Source:RGD Symbol;Acc:1564659]
ENSRNOG00000028114	2.97037	2.3992	9.01088e-06	0.000226259	Hbq1b	hemoglobin, theta 1B [Source:RGD Symbol;Acc:2320907]
ENSRNOG00000022707	2.93904	2.94965	8.07337e-18	1.26329e-15	Pmp2	peripheral myelin protein 2 [Source:RGD Symbol;Acc:1585218]
ENSRNOG00000028261	2.89694	-0.16533	3.17045e-05	0.00065088	Tppp	tubulin polymerization promoting protein [Source:RGD Symbol;Acc:1310121]
ENSRNOG00000011305	2.85672	1.71132	4.24464e-11	3.20371e-09	Sox10	SRY box 10 [Source:RGD Symbol;Acc:3735]
ENSRNOG00000039457	2.78741	-0.438941	2.4853e-05	0.000535049	Pcdhgb5	protocadherin gamma subfamily B, 5 [Source:RGD Symbol;Acc:1591752]
ENSRNOG00000006237	2.71825	0.562297	9.26021e-08	4.16905e-06	Gpr37l1	G protein-coupled receptor 37-like 1 [Source:RGD Symbol;Acc:628835]
ENSRNOG00000006569	2.71347	0.117023	0.000432097	0.00539323	Itgb8	integrin subunit beta 8 [Source:RGD Symbol;Acc:1311374]
ENSRNOG00000015156	2.68331	3.38494	4.62873e-18	7.71315e-16	Gal	galanin and GMAP prepropeptide [Source:RGD Symbol;Acc:61954]
ENSRNOG00000008137	2.68079	2.51029	1.51815e-11	1.19718e-09	Cdk18	cyclin-dependent kinase 18 [Source:RGD Symbol;Acc:1309523]
ENSRNOG00000009043	2.57554	-0.384402	3.48922e-05	0.000702829	Piwil4	piwi-like RNA-mediated gene silencing 4 [Source:RGD Symbol;Acc:1311015]
ENSRNOG00000016838	2.50799	0.954481	1.45225e-10	1.01824e-08	Pla2g5	phospholipase A2, group V [Source:RGD Symbol;Acc:62051]
ENSRNOG00000027220	2.47375	-0.512963	0.000125972	0.0019955	Pcdhgb8	protocadherin gamma subfamily B, 8 [Source:RGD Symbol;Acc:1307432]
ENSRNOG00000005770	2.44917	1.96065	1.5254e-08	7.70566e-07	Sostdc1	sclerostin domain containing 1 [Source:RGD Symbol;Acc:628877]
ENSRNOG00000037911	2.44487	1.11138	7.60293e-09	3.99808e-07	LOC680227	LRRGT00193 [Source:RGD Symbol;Acc:1594204]
ENSRNOG00000061514	2.40847	0.0955383	1.16942e-06	3.90752e-05	AABR07028795.1
ENSRNOG00000007002	2.40611	0.385208	1.93671e-07	8.06816e-06	Lif	leukemia inhibitory factor [Source:RGD Symbol;Acc:620865]
ENSRNOG00000002919	2.38729	1.29315	1.11432e-08	5.74211e-07	Gfap	glial fibrillary acidic protein [Source:RGD Symbol;Acc:2679]
ENSRNOG00000023404	2.38477	4.06735	3.30667e-16	4.51361e-14	Slc9b2	solute carrier family 9 member B2 [Source:RGD Symbol;Acc:1598112]
ENSRNOG00000002158	2.38113	8.10418	0.000164348	0.00246325	Ibsp	integrin-binding sialoprotein [Source:RGD Symbol;Acc:2855]
ENSRNOG00000058111	2.37036	-0.245112	6.56125e-06	0.000171811	Itga2	integrin alpha 2 [Source:RGD Symbol;Acc:621632]
ENSRNOG00000028206	2.34168	2.21141	1.30002e-11	1.05573e-09	Fam109a	family with sequence similarity 109, member A [Source:RGD Symbol;Acc:1310656]
ENSRNOG00000014552	2.33078	1.52992	2.17164e-08	1.07171e-06	LOC100909657	uncharacterized LOC100909657 [Source:RGD Symbol;Acc:6502210]
ENSRNOG00000050767	2.32916	1.75578	0.000855985	0.00891488	Nrn1	neuritin 1 [Source:RGD Symbol;Acc:621586]
ENSRNOG00000054420	2.32369	3.60453	2.74558e-07	1.10089e-05	Vdr	vitamin D (1,25- dihydroxyvitamin D3) receptor [Source:RGD Symbol;Acc:3959]
ENSRNOG00000002419	2.32341	3.15761	7.36417e-10	4.49951e-08	Plp1	proteolipid protein 1 [Source:RGD Symbol;Acc:3354]
ENSRNOG00000024762	2.3203	0.150712	5.6579e-06	0.000151558	Frmd7	FERM domain containing 7 [Source:RGD Symbol;Acc:1562057]
ENSRNOG00000020864	2.31733	1.31006	1.13401e-10	8.22062e-09	Kirrel2	kin of IRRE like 2 (Drosophila) [Source:RGD Symbol;Acc:1308456]
ENSRNOG00000025704	2.31285	0.291783	4.63658e-06	0.00012877	Yod1	YOD1 deubiquitinase [Source:RGD Symbol;Acc:1359726]
ENSRNOG00000019692	2.30047	3.26584	1.68652e-07	7.095e-06	Metrn	meteorin, glial cell differentiation regulator [Source:RGD Symbol;Acc:1306222]
ENSRNOG00000029841	2.2542	1.16531	2.11281e-07	8.71687e-06	Cdh19	cadherin 19 [Source:RGD Symbol;Acc:1307169]
ENSRNOG00000017539	2.25413	8.15309	5.1276e-10	3.20938e-08	Mmp9	matrix metallopeptidase 9 [Source:RGD Symbol;Acc:621320]
ENSRNOG00000005727	2.2514	1.46155	1.50869e-06	4.85163e-05	Galnt3	polypeptide N-acetylgalactosaminyltransferase 3 [Source:RGD Symbol;Acc:1306443]
ENSRNOG00000003171	2.21085	5.75729	1.72245e-15	2.16674e-13	Mpz	myelin protein zero [Source:RGD Symbol;Acc:3109]
ENSRNOG00000031675	2.19991	2.46743	2.36822e-11	1.80873e-09	Panx3	pannexin 3 [Source:RGD Symbol;Acc:735137]
ENSRNOG00000018236	2.19862	-0.482191	0.000629433	0.00717838	Cym	chymosin [Source:RGD Symbol;Acc:708486]
ENSRNOG00000014532	2.17484	6.04548	1.19826e-05	0.000287918	Lbp	lipopolysaccharide binding protein [Source:RGD Symbol;Acc:61865]
ENSRNOG00000011989	2.17226	0.80905	1.0269e-06	3.48681e-05	Vat1l	vesicle amine transport 1-like [Source:RGD Symbol;Acc:1598315]
ENSRNOG00000032626	2.17044	3.20922	6.063e-10	3.75818e-08	Mmp3	matrix metallopeptidase 3 [Source:RGD Symbol;Acc:621317]
ENSRNOG00000021705	2.16934	1.26786	6.46274e-05	0.00117957	LOC102556092	uncharacterized LOC102556092 [Source:RGD Symbol;Acc:7677226]
ENSRNOG00000061230	2.14288	0.700889	3.55543e-06	0.00010183	L1cam	L1 cell adhesion molecule [Source:RGD Symbol;Acc:619777]
ENSRNOG00000011923	2.13137	0.33935	0.000206388	0.00296547	Mgarp	mitochondria-localized glutamic acid-rich protein [Source:RGD Symbol;Acc:1586369]
ENSRNOG00000019207	2.12837	0.583703	2.27166e-06	6.81021e-05	Shank1	SH3 and multiple ankyrin repeat domains 1 [Source:RGD Symbol;Acc:621011]
ENSRNOG00000000463	2.11448	5.06317	5.88812e-11	4.34198e-09	Col11a2	collagen type XI alpha 2 chain [Source:RGD Symbol;Acc:2373]
ENSRNOG00000000436	2.10534	3.16325	6.95392e-13	6.60931e-11	Egfl8	EGF-like-domain, multiple 8 [Source:RGD Symbol;Acc:1549706]
ENSRNOG00000005392	2.07399	2.86388	1.25427e-10	8.94083e-09	Ngfr	nerve growth factor receptor [Source:RGD Symbol;Acc:3177]
ENSRNOG00000010037	2.05373	5.16296	2.22157e-10	1.51622e-08	Epb41	erythrocyte membrane protein band 4.1 [Source:RGD Symbol;Acc:1564762]
ENSRNOG00000007545	2.05188	3.61814	0.000653913	0.00735997	Angptl4	angiopoietin-like 4 [Source:RGD Symbol;Acc:735058]
ENSRNOG00000043019	2.01463	-0.0619215	0.000394491	0.00499676	Btnl10	butyrophilin like 10 [Source:RGD Symbol;Acc:1559732]
ENSRNOG00000017434	2.01359	0.755966	7.78749e-08	3.54331e-06	Mgat3	mannosyl (beta-1,4-)-glycoprotein beta-1,4-N-acetylglucosaminyltransferase [Source:RGD Symbol;Acc:3084]
ENSRNOG00000024322	2.00713	1.97995	3.83392e-09	2.12039e-07	Shroom2	shroom family member 2 [Source:RGD Symbol;Acc:1565163]
ENSRNOG00000042384	1.98458	0.419739	4.95446e-05	0.000939005	Kctd7	potassium channel tetramerization domain containing 7 [Source:RGD Symbol;Acc:1582914]
ENSRNOG00000047446	1.96234	1.8332	2.32049e-05	0.000505754	Foxc2	forkhead box C2 [Source:RGD Symbol;Acc:621703]
ENSRNOG00000031851	1.94766	3.85098	1.61066e-10	1.12317e-08	Ndufa4l2	NDUFA4, mitochondrial complex associated like 2 [Source:RGD Symbol;Acc:2324558]
ENSRNOG00000032991	1.91953	1.23726	4.75805e-08	2.26953e-06	Rufy4	RUN and FYVE domain containing 4 [Source:RGD Symbol;Acc:1560678]
ENSRNOG00000027228	1.9126	-0.353389	0.000564042	0.00662143	Mogat2	monoacylglycerol O-acyltransferase 2 [Source:RGD Symbol;Acc:1598060]
ENSRNOG00000006198	1.90838	0.940073	1.12653e-05	0.000274279	Prr11	proline rich 11 [Source:RGD Symbol;Acc:1561541]
ENSRNOG00000004697	1.90622	1.58925	1.77535e-07	7.42005e-06	Baalc	brain and acute leukemia, cytoplasmic [Source:RGD Symbol;Acc:628703]
ENSRNOG00000028984	1.90318	0.194292	5.31266e-05	0.00099882	RGD1563307	similar to Set beta isoform [Source:RGD Symbol;Acc:1563307]
ENSRNOG00000026488	1.88552	3.33519	4.35287e-05	0.000836103	Gltpd2	glycolipid transfer protein domain containing 2 [Source:RGD Symbol;Acc:1560459]
ENSRNOG00000008245	1.87949	3.2854	4.98117e-06	0.00013686	Ptgis	prostaglandin I2 synthase [Source:RGD Symbol;Acc:3438]
ENSRNOG00000022067	1.86761	1.31383	1.49337e-07	6.30986e-06	Tlr5	toll-like receptor 5 [Source:RGD Symbol;Acc:631351]
ENSRNOG00000048148	1.84679	0.236496	0.000934407	0.0095086	Ly6l	lymphocyte antigen 6 complex, locus L [Source:RGD Symbol;Acc:1597652]
ENSRNOG00000048449	1.8442	3.00435	1.01215e-05	0.000250713	Itgb3	integrin subunit beta 3 [Source:RGD Symbol;Acc:628868]
ENSRNOG00000039390	1.83878	6.30045	1.95265e-06	6.00827e-05	Slc37a2	solute carrier family 37 member 2 [Source:RGD Symbol;Acc:1564160]
ENSRNOG00000004781	1.83351	0.166018	5.31676e-05	0.00099882	Crmp1	collapsin response mediator protein 1 [Source:RGD Symbol;Acc:2407]
ENSRNOG00000003276	1.82939	5.96014	3.99211e-10	2.57401e-08	Myo1d	myosin ID [Source:RGD Symbol;Acc:621321]
ENSRNOG00000033588	1.80985	0.560562	1.94976e-06	6.00827e-05	Siglec15	sialic acid binding Ig-like lectin 15 [Source:RGD Symbol;Acc:1565948]
ENSRNOG00000027341	1.8022	1.18532	6.5557e-06	0.000171811	Tenm2	teneurin transmembrane protein 2 [Source:RGD Symbol;Acc:727907]
ENSRNOG00000020948	1.79612	5.25239	1.92694e-05	0.00043606	Pth1r	parathyroid hormone 1 receptor [Source:RGD Symbol;Acc:3442]
ENSRNOG00000053675	1.7943	1.46748	3.22908e-06	9.37383e-05	Dhh	desert hedgehog [Source:RGD Symbol;Acc:620711]
ENSRNOG00000055512	1.78468	0.871418	2.98534e-05	0.000622844	Hist1h2bk	histone cluster 1 H2B family member k [Source:RGD Symbol;Acc:1593016]
ENSRNOG00000017130	1.77147	4.60871	3.58536e-09	2.0089e-07	Rhd	Rh blood group, D antigen [Source:RGD Symbol;Acc:620451]
ENSRNOG00000006950	1.76186	2.01926	1.26452e-08	6.49e-07	Padi3	peptidyl arginine deiminase 3 [Source:RGD Symbol;Acc:3289]
ENSRNOG00000010605	1.76111	0.125669	0.000538886	0.00639043	Gsc	goosecoid homeobox [Source:RGD Symbol;Acc:631425]
ENSRNOG00000006911	1.74942	5.54533	1.91676e-06	5.92626e-05	Sptb	spectrin, beta, erythrocytic [Source:RGD Symbol;Acc:1303243]
ENSRNOG00000032596	1.74636	0.879419	4.07095e-05	0.00079263	RT1-T24-1	RT1 class I, locus T24, gene 1 [Source:RGD Symbol;Acc:1359499]
ENSRNOG00000024243	1.73974	3.43011	0.000141452	0.00218408	Cadm4	cell adhesion molecule 4 [Source:RGD Symbol;Acc:1304722]
ENSRNOG00000032002	1.73923	1.62338	7.53814e-09	3.98033e-07	Hapln1	hyaluronan and proteoglycan link protein 1 [Source:RGD Symbol;Acc:2412]
ENSRNOG00000010551	1.73669	0.274548	0.000146496	0.00224575	Lhx2	LIM homeobox 2 [Source:RGD Symbol;Acc:71076]
ENSRNOG00000017054	1.73584	2.81538	0.000144313	0.00222023	Kcne3	potassium voltage-gated channel subfamily E regulatory subunit 3 [Source:RGD Symbol;Acc:621384]
ENSRNOG00000004278	1.73402	2.37822	1.15433e-06	3.86717e-05	Dlx3	distal-less homeobox 3 [Source:RGD Symbol;Acc:1304875]
ENSRNOG00000027767	1.73093	2.09183	1.32563e-06	4.36131e-05	Slc38a5	solute carrier family 38, member 5 [Source:RGD Symbol;Acc:620702]
ENSRNOG00000049425	1.73043	3.40108	0.000180061	0.0026495	Fam167b	family with sequence similarity 167, member B [Source:RGD Symbol;Acc:1584589]
ENSRNOG00000020353	1.72948	4.6301	2.9952e-09	1.68559e-07	Sh3pxd2a	SH3 and PX domains 2A [Source:RGD Symbol;Acc:1311185]
ENSRNOG00000015682	1.71878	4.31013	0.00012615	0.00199584	Kel	Kell blood group, metallo-endopeptidase [Source:RGD Symbol;Acc:1565470]
ENSRNOG00000014923	1.70284	0.75231	1.24063e-06	4.11332e-05	Ifitm5	interferon induced transmembrane protein 5 [Source:RGD Symbol;Acc:1307900]
ENSRNOG00000019607	1.69832	6.55663	2.84867e-06	8.40258e-05	Bglap	bone gamma-carboxyglutamate protein [Source:RGD Symbol;Acc:2206]
ENSRNOG00000020908	1.69384	1.63422	3.3534e-05	0.000682976	LOC303566	E2F1-inducible gene [Source:RGD Symbol;Acc:1305385]
ENSRNOG00000040287	1.6934	5.4754	1.97969e-06	6.06238e-05	Cyp1b1	cytochrome P450, family 1, subfamily b, polypeptide 1 [Source:RGD Symbol;Acc:2460]
ENSRNOG00000001369	1.68803	2.01183	5.06696e-06	0.000138623	Oas1a	2'-5' oligoadenylate synthetase 1A [Source:RGD Symbol;Acc:621760]
ENSRNOG00000016558	1.68601	0.175407	0.00013065	0.00204936	Pllp	plasmolipin [Source:RGD Symbol;Acc:621478]
ENSRNOG00000057189	1.67281	3.27225	2.95417e-05	0.000621393	LOC103690326	dendritic cell-specific transmembrane protein [Source:RGD Symbol;Acc:9418155]
ENSRNOG00000012067	1.67023	5.90117	0.000740958	0.00802976	Fam111a	family with sequence similarity 111, member A [Source:RGD Symbol;Acc:1560913]
ENSRNOG00000031760	1.66582	0.52999	2.28972e-05	0.000503071	Fmn1	formin 1 [Source:RGD Symbol;Acc:1306349]
ENSRNOG00000007805	1.65922	4.34923	3.72053e-07	1.44224e-05	Mybl2	myeloblastosis oncogene-like 2 [Source:RGD Symbol;Acc:1308474]
ENSRNOG00000021217	1.65664	2.7367	2.02285e-09	1.16915e-07	Itga10	integrin subunit alpha 10 [Source:RGD Symbol;Acc:1305152]
ENSRNOG00000049976	1.65403	0.279344	0.000109496	0.00177841	Gzmb	granzyme B [Source:RGD Symbol;Acc:620018]
ENSRNOG00000003028	1.65141	0.0900903	0.000202708	0.00292899	Dnah17	dynein, axonemal, heavy chain 17 [Source:RGD Symbol;Acc:1563805]
ENSRNOG00000046261	1.64403	8.46744	6.8777e-06	0.000178639	Acp5	acid phosphatase 5, tartrate resistant [Source:RGD Symbol;Acc:2022]
ENSRNOG00000024703	1.64296	2.03181	1.26067e-07	5.50191e-06	Dock5	dedicator of cytokinesis 5 [Source:RGD Symbol;Acc:1306872]
ENSRNOG00000049862	1.64005	1.59987	0.000220671	0.00313211	Rnf157	ring finger protein 157 [Source:RGD Symbol;Acc:1591154]
ENSRNOG00000009345	1.62547	0.969369	2.78762e-05	0.000590231	Ugt8	UDP glycosyltransferase 8 [Source:RGD Symbol;Acc:3938]
ENSRNOG00000011504	1.62126	3.75272	4.90585e-10	3.08563e-08	Akap2	A-kinase anchoring protein 2 [Source:RGD Symbol;Acc:1305135]
ENSRNOG00000021155	1.62045	9.445	1.56291e-05	0.00036198	Ctsk	cathepsin K [Source:RGD Symbol;Acc:61810]
ENSRNOG00000004392	1.61928	2.49485	1.31475e-07	5.69917e-06	Aatk	apoptosis-associated tyrosine kinase [Source:RGD Symbol;Acc:1590980]
ENSRNOG00000002139	1.61857	1.50456	8.86725e-05	0.00151499	RGD1311575	hypothetical LOC289568 [Source:RGD Symbol;Acc:1311575]
ENSRNOG00000007827	1.61239	2.78291	2.63495e-06	7.85003e-05	Cox4i2	cytochrome c oxidase subunit 4i2 [Source:RGD Symbol;Acc:69422]
ENSRNOG00000054217	1.61084	0.846258	6.84293e-06	0.000178097	Runx3	runt-related transcription factor 3 [Source:RGD Symbol;Acc:620082]
ENSRNOG00000001926	1.61041	3.25428	2.96089e-08	1.45005e-06	Cldn1	claudin 1 [Source:RGD Symbol;Acc:68422]
ENSRNOG00000003969	1.60618	2.71075	5.53451e-07	2.05241e-05	Fam20a	FAM20A, golgi associated secretory pathway pseudokinase [Source:RGD Symbol;Acc:1306364]
ENSRNOG00000045771	1.59784	0.310096	0.000340275	0.0044461	Chl1	cell adhesion molecule L1-like [Source:RGD Symbol;Acc:620122]
ENSRNOG00000018982	1.59745	1.73586	2.2006e-05	0.000486539	Entpd3	ectonucleoside triphosphate diphosphohydrolase 3 [Source:RGD Symbol;Acc:631326]
ENSRNOG00000015750	1.58837	0.162984	8.13383e-05	0.00141851	Wnt7b	wingless-type MMTV integration site family, member 7B [Source:RGD Symbol;Acc:1311441]
ENSRNOG00000046468	1.583	2.96162	1.48982e-06	4.80299e-05	Ptgfr	prostaglandin F receptor [Source:RGD Symbol;Acc:3436]
ENSRNOG00000008450	1.58021	1.89312	4.23752e-05	0.000822566	LOC100359539	ribonucleotide reductase M2 polypeptide [Source:RGD Symbol;Acc:2323655]
ENSRNOG00000061199	1.57925	0.851932	0.000447089	0.00551596	Tcfl5	transcription factor like 5 [Source:RGD Symbol;Acc:1305899]
ENSRNOG00000018627	1.56748	3.47014	9.61097e-07	3.32395e-05	Plekhb1	pleckstrin homology domain containing B1 [Source:RGD Symbol;Acc:621614]
ENSRNOG00000008040	1.56734	3.38683	0.000139792	0.00216889	Fam64a	family with sequence similarity 64, member A [Source:RGD Symbol;Acc:1308747]
ENSRNOG00000010997	1.55845	1.36777	6.61566e-06	0.000172531	Ednrb	endothelin receptor type B [Source:RGD Symbol;Acc:2536]
ENSRNOG00000013196	1.55694	2.62894	6.60312e-06	0.000172531	Dok5	docking protein 5 [Source:RGD Symbol;Acc:1562846]
ENSRNOG00000014343	1.54246	1.90653	2.32164e-05	0.000505754	Anln	anillin, actin binding protein [Source:RGD Symbol;Acc:1561367]
ENSRNOG00000011585	1.53894	0.782869	1.88976e-05	0.000430683	Fat3	FAT atypical cadherin 3 [Source:RGD Symbol;Acc:620657]
ENSRNOG00000027849	1.53827	1.5274	2.17548e-06	6.55248e-05	Wipf2	WAS/WASL interacting protein family, member 2 [Source:RGD Symbol;Acc:1561080]
ENSRNOG00000026793	1.53373	1.16571	4.19275e-06	0.000117718	Nt5dc3	5'-nucleotidase domain containing 3 [Source:RGD Symbol;Acc:1593358]
ENSRNOG00000011593	1.53323	1.001	2.31842e-05	0.000505754	Hey1	hes-related family bHLH transcription factor with YRPW motif 1 [Source:RGD Symbol;Acc:621403]
ENSRNOG00000020625	1.52963	0.807626	3.16843e-05	0.00065088	Mcpt2	mast cell protease 2 [Source:RGD Symbol;Acc:621058]
ENSRNOG00000059683	1.52851	0.207233	0.00069924	0.00772113	Mpp2	membrane palmitoylated protein 2 [Source:RGD Symbol;Acc:620014]
ENSRNOG00000058568	1.51855	4.04798	7.29782e-06	0.000187652	Dhrs9	dehydrogenase/reductase 9 [Source:RGD Symbol;Acc:620655]
ENSRNOG00000046947	1.51656	2.11985	1.42498e-07	6.07437e-06	Ak5	adenylate kinase 5 [Source:RGD Symbol;Acc:1590818]
ENSRNOG00000013148	1.51523	2.16798	3.91042e-06	0.000110761	Rad54l	RAD54 like (S. cerevisiae) [Source:RGD Symbol;Acc:1310600]
ENSRNOG00000022260	1.50999	0.659133	8.01861e-05	0.00140462	Senp1	SUMO1/sentrin specific peptidase 1 [Source:RGD Symbol;Acc:1310275]
ENSRNOG00000008936	1.50742	2.52286	5.63001e-07	2.07582e-05	Map3k6	mitogen-activated protein kinase kinase kinase 6 [Source:RGD Symbol;Acc:1304625]
ENSRNOG00000013973	1.50724	2.95718	0.000328054	0.00432481	Lcn2	lipocalin 2 [Source:RGD Symbol;Acc:69408]
ENSRNOG00000003984	1.50476	2.64819	7.07145e-06	0.000182931	Apln	apelin [Source:RGD Symbol;Acc:620672]
ENSRNOG00000002843	1.50436	2.66663	0.000998231	0.00999071	Cxcl6	C-X-C motif chemokine ligand 6 [Source:RGD Symbol;Acc:708540]
ENSRNOG00000052785	1.50088	1.4559	4.25043e-06	0.000119077	AABR07021823.1
ENSRNOG00000049033	1.49617	2.53162	2.1283e-06	6.42545e-05	Racgap1	Rac GTPase-activating protein 1 [Source:RGD Symbol;Acc:1305912]
ENSRNOG00000039571	1.49301	0.757716	0.000670381	0.00748303	Glod5	glyoxalase domain containing 5 [Source:RGD Symbol;Acc:1564596]
ENSRNOG00000024712	1.48789	2.47606	1.1852e-06	3.94995e-05	Insc	inscuteable homolog (Drosophila) [Source:RGD Symbol;Acc:1311379]
ENSRNOG00000004458	1.47982	0.328555	0.000329375	0.00433013	Ston2	stonin 2 [Source:RGD Symbol;Acc:1311502]
ENSRNOG00000011927	1.47749	6.05266	1.98739e-06	6.07147e-05	Sdc3	syndecan 3 [Source:RGD Symbol;Acc:621486]
ENSRNOG00000039902	1.47674	3.14939	1.40129e-07	5.99331e-06	Lbh	limb bud and heart development [Source:RGD Symbol;Acc:1584525]
ENSRNOG00000001295	1.47615	5.09225	2.64761e-10	1.77861e-08	S100b	S100 calcium binding protein B [Source:RGD Symbol;Acc:3615]
ENSRNOG00000050697	1.46473	7.82865	1.43522e-08	7.33678e-07	Ctsz	cathepsin Z [Source:RGD Symbol;Acc:708479]
ENSRNOG00000045728	1.45828	0.971401	6.05475e-05	0.00111461	AABR07033887.1
ENSRNOG00000024420	1.45683	1.3298	4.26341e-05	0.000825096	Eme1	essential meiotic structure-specific endonuclease 1 [Source:RGD Symbol;Acc:1309067]
ENSRNOG00000009594	1.45588	5.26799	0.000850135	0.00886212	Snai1	snail family transcriptional repressor 1 [Source:RGD Symbol;Acc:620758]
ENSRNOG00000006384	1.45394	1.49498	1.15295e-05	0.000279581	Ddx58	DEXD/H-box helicase 58 [Source:RGD Symbol;Acc:1309460]
ENSRNOG00000016203	1.45256	0.122544	0.000688959	0.00763388	Efna2	ephrin A2 [Source:RGD Symbol;Acc:620389]
ENSRNOG00000017981	1.4503	2.74416	4.2722e-06	0.000119426	Mcm10	minichromosome maintenance 10 replication initiation factor [Source:RGD Symbol;Acc:1311330]
ENSRNOG00000025184	1.44419	6.73189	0.000153625	0.00233828	Prss35	protease, serine, 35 [Source:RGD Symbol;Acc:1311282]
ENSRNOG00000032699	1.44277	1.55094	0.000121743	0.00193567	Ttyh1	tweety family member 1 [Source:RGD Symbol;Acc:1310103]
ENSRNOG00000008356	1.44256	3.37612	0.00018276	0.00267511	Myo5c	myosin VC [Source:RGD Symbol;Acc:1309994]
ENSRNOG00000002946	1.43543	3.44082	2.63746e-07	1.0675e-05	Socs3	suppressor of cytokine signaling 3 [Source:RGD Symbol;Acc:621087]
ENSRNOG00000001971	1.43541	0.514651	0.000564687	0.00662295	Bbx	BBX, HMG-box containing [Source:RGD Symbol;Acc:1309769]
ENSRNOG00000015465	1.42312	0.959671	0.000994947	0.00996578	Cep72	centrosomal protein 72 [Source:RGD Symbol;Acc:1566336]
ENSRNOG00000016225	1.41497	3.42546	1.7426e-08	8.76838e-07	Fgd3	FYVE, RhoGEF and PH domain containing 3 [Source:RGD Symbol;Acc:1311725]
ENSRNOG00000013057	1.41403	5.10777	3.79783e-08	1.83195e-06	Prc1	protein regulator of cytokinesis 1 [Source:RGD Symbol;Acc:1311754]
ENSRNOG00000014443	1.40677	1.95622	5.23234e-06	0.000142148	Pde5a	phosphodiesterase 5A [Source:RGD Symbol;Acc:620995]
ENSRNOG00000022537	1.39958	2.21792	2.44261e-05	0.000527216	E2f8	E2F transcription factor 8 [Source:RGD Symbol;Acc:1308091]
ENSRNOG00000006741	1.39834	5.24019	0.000740656	0.00802976	Podnl1	podocan-like 1 [Source:RGD Symbol;Acc:1307753]
ENSRNOG00000005115	1.39759	3.30609	1.16501e-07	5.13686e-06	Asf1b	anti-silencing function 1B histone chaperone [Source:RGD Symbol;Acc:1304918]
ENSRNOG00000038035	1.39026	3.86117	6.90804e-06	0.000179065	Kif4a	kinesin family member 4A [Source:RGD Symbol;Acc:620526]
ENSRNOG00000051278	1.38882	0.269723	0.000767316	0.00821823	Rn50_19_0706.2
ENSRNOG00000003088	1.38236	3.83658	8.13672e-05	0.00141851	Arhgap31	Rho GTPase activating protein 31 [Source:RGD Symbol;Acc:1306093]
ENSRNOG00000008365	1.38207	0.835286	0.000284321	0.00384823	Hoxb2	homeobox B2 [Source:RGD Symbol;Acc:2319509]
ENSRNOG00000008885	1.38176	1.56253	0.000290616	0.00391279	Chst11	carbohydrate sulfotransferase 11 [Source:RGD Symbol;Acc:1308400]
ENSRNOG00000011353	1.38043	1.82237	0.000732834	0.00796864	Gfi1b	growth factor independent 1B transcriptional repressor [Source:RGD Symbol;Acc:1311727]
ENSRNOG00000055157	1.3791	2.12785	2.57009e-07	1.04357e-05	Pard6g	par-6 family cell polarity regulator gamma [Source:RGD Symbol;Acc:1305016]
ENSRNOG00000032813	1.37752	3.22368	0.000381645	0.00489244	Mdc1	mediator of DNA damage checkpoint 1 [Source:RGD Symbol;Acc:1559468]
ENSRNOG00000013572	1.37616	5.87144	0.000128003	0.00201475	Lxn	latexin [Source:RGD Symbol;Acc:68361]
ENSRNOG00000009354	1.37471	3.14362	0.000470245	0.00574093	Nrarp	Notch-regulated ankyrin repeat protein [Source:RGD Symbol;Acc:1591939]
ENSRNOG00000032446	1.37279	1.61287	7.46818e-05	0.00133062	Recql4	RecQ like helicase 4 [Source:RGD Symbol;Acc:1307732]
ENSRNOG00000017197	1.37261	3.435	1.36647e-07	5.88362e-06	Pdgfb	platelet derived growth factor subunit B [Source:RGD Symbol;Acc:3283]
ENSRNOG00000020803	1.37107	2.61714	1.35274e-06	4.42033e-05	Meox1	mesenchyme homeobox 1 [Source:RGD Symbol;Acc:1308911]
ENSRNOG00000010872	1.37096	8.3839	9.9125e-08	4.41623e-06	Ckb	creatine kinase B [Source:RGD Symbol;Acc:2357]
ENSRNOG00000026964	1.36781	1.21738	6.12659e-05	0.00112461	Gas8	growth arrest specific 8 [Source:RGD Symbol;Acc:1307817]
ENSRNOG00000010161	1.36688	4.30624	1.47076e-06	4.75347e-05	Myo10	myosin X [Source:RGD Symbol;Acc:1307193]
ENSRNOG00000016571	1.36646	0.902878	0.000953602	0.00964958	Ngf	nerve growth factor [Source:RGD Symbol;Acc:1598328]
ENSRNOG00000000407	1.36591	0.647204	0.000348863	0.00453982	Dcbld1	discoidin, CUB and LCCL domain containing 1 [Source:RGD Symbol;Acc:1307211]
ENSRNOG00000020151	1.36537	1.6871	0.00052528	0.00626964	Cdh1	cadherin 1 [Source:RGD Symbol;Acc:69279]
ENSRNOG00000015858	1.36285	0.994855	6.81301e-05	0.0012295	Hyal1	hyaluronoglucosaminidase 1 [Source:RGD Symbol;Acc:1303060]
ENSRNOG00000023148	1.36278	8.15654	0.000477646	0.00581468	Col11a1	collagen type XI alpha 1 chain [Source:RGD Symbol;Acc:2372]
ENSRNOG00000046428	1.36165	4.0882	6.02983e-05	0.00111322	Lrrc75b	leucine rich repeat containing 75B [Source:RGD Symbol;Acc:2318441]
ENSRNOG00000025415	1.36121	0.618974	0.00093175	0.00950341	Mettl11b	methyltransferase like 11B [Source:RGD Symbol;Acc:1564106]
ENSRNOG00000059997	1.35819	1.44258	5.68543e-05	0.00105724	Brip1	BRCA1 interacting protein C-terminal helicase 1 [Source:RGD Symbol;Acc:1307659]
ENSRNOG00000028207	1.35817	0.758901	0.000942249	0.00955731	Colgalt2	collagen beta(1-O)galactosyltransferase 2 [Source:RGD Symbol;Acc:1304702]
ENSRNOG00000019100	1.35685	3.06557	1.31043e-06	4.32238e-05	Kif2c	kinesin family member 2C [Source:RGD Symbol;Acc:620239]
ENSRNOG00000054286	1.35525	2.51283	1.03715e-05	0.000255916	Rrm2	ribonucleotide reductase regulatory subunit M2 [Source:RGD Symbol;Acc:1598310]
ENSRNOG00000011921	1.35014	2.60352	1.56009e-06	4.97947e-05	Dusp4	dual specificity phosphatase 4 [Source:RGD Symbol;Acc:620625]
ENSRNOG00000020880	1.34645	1.36937	9.07375e-05	0.00154002	Klhl18	kelch-like family member 18 [Source:RGD Symbol;Acc:1310570]
ENSRNOG00000007744	1.34273	3.96653	0.000580125	0.00674237	Ehd3	EH-domain containing 3 [Source:RGD Symbol;Acc:621762]
ENSRNOG00000057092	1.34202	7.48372	8.70244e-05	0.00149479	Slfn4	schlafen 4 [Source:RGD Symbol;Acc:620455]
ENSRNOG00000011777	1.34035	3.83636	5.45722e-07	2.03269e-05	Spag5	sperm associated antigen 5 [Source:RGD Symbol;Acc:620152]
ENSRNOG00000049770	1.33832	1.05655	6.93752e-05	0.00124846	Cryba4	crystallin, beta A4 [Source:RGD Symbol;Acc:61962]
ENSRNOG00000058539	1.33677	3.97729	5.72911e-06	0.000153146	Ccnb1	cyclin B1 [Source:RGD Symbol;Acc:2291]
ENSRNOG00000011387	1.33217	1.01192	0.000363062	0.00469129	Tet3	tet methylcytosine dioxygenase 3 [Source:RGD Symbol;Acc:1590584]
ENSRNOG00000001652	1.32842	3.68608	0.000638395	0.00724248	Erg	ERG, ETS transcription factor [Source:RGD Symbol;Acc:621108]
ENSRNOG00000020857	1.32015	3.36141	5.1558e-07	1.93433e-05	Ppfia1	PTPRF interacting protein alpha 1 [Source:RGD Symbol;Acc:1309009]
ENSRNOG00000014060	1.31601	5.67572	1.34954e-06	4.42033e-05	Mras	muscle RAS oncogene homolog [Source:RGD Symbol;Acc:3111]
ENSRNOG00000008246	1.31197	6.18841	1.65622e-05	0.000382212	Emilin1	elastin microfibril interfacer 1 [Source:RGD Symbol;Acc:1311209]
ENSRNOG00000022166	1.3105	0.728167	0.000707355	0.00777075	Ammecr1	Alport syndrome, mental retardation, midface hypoplasia and elliptocytosis chromosomal region gene 1 [Source:RGD Symbol;Acc:1561004]
ENSRNOG00000025120	1.30792	2.56132	4.01959e-06	0.000113318	Gli1	GLI family zinc finger 1 [Source:RGD Symbol;Acc:621673]
ENSRNOG00000005700	1.30549	5.39773	0.000512696	0.00615979	Nsg1	neuron specific gene family member 1 [Source:RGD Symbol;Acc:2222]
ENSRNOG00000013521	1.30478	4.99408	5.44764e-06	0.000146694	Dhfr	dihydrofolate reductase [Source:RGD Symbol;Acc:2500]
ENSRNOG00000015618	1.3033	3.83639	7.27593e-06	0.000187465	Wnt5a	wingless-type MMTV integration site family, member 5A [Source:RGD Symbol;Acc:69250]
ENSRNOG00000021447	1.30053	2.79712	5.75651e-05	0.00106891	Prr7	proline rich 7 (synaptic) [Source:RGD Symbol;Acc:1561898]
ENSRNOG00000020647	1.29791	1.36886	5.9453e-05	0.00110078	Ctsg	cathepsin G [Source:RGD Symbol;Acc:1307681]
ENSRNOG00000010188	1.29585	3.02269	5.08572e-06	0.00013884	Satb2	SATB homeobox 2 [Source:RGD Symbol;Acc:1562369]
ENSRNOG00000016689	1.29574	2.56027	4.9419e-06	0.000136072	Fanci	Fanconi anemia, complementation group I [Source:RGD Symbol;Acc:2321863]
ENSRNOG00000021437	1.28157	3.23187	0.000280794	0.00381256	AABR07073181.1
ENSRNOG00000022704	1.28018	1.31927	3.45567e-05	0.000698262	Esyt3	extended synaptotagmin 3 [Source:RGD Symbol;Acc:1561304]
ENSRNOG00000017208	1.28006	4.71877	3.13856e-08	1.53121e-06	Cspg4	chondroitin sulfate proteoglycan 4 [Source:RGD Symbol;Acc:619942]
ENSRNOG00000018369	1.27955	2.55907	5.47976e-05	0.00102494	Prx	periaxin [Source:RGD Symbol;Acc:619960]
ENSRNOG00000010797	1.27936	1.38697	0.000108231	0.00177753	Esm1	endothelial cell-specific molecule 1 [Source:RGD Symbol;Acc:71013]
ENSRNOG00000000567	1.27909	3.83931	3.87452e-06	0.000109987	Unc5b	unc-5 netrin receptor B [Source:RGD Symbol;Acc:621756]
ENSRNOG00000017601	1.27907	1.88393	2.96367e-05	0.000621577	Srd5a1	steroid 5 alpha-reductase 1 [Source:RGD Symbol;Acc:3757]
ENSRNOG00000010208	1.27906	8.36079	2.77436e-05	0.000589368	Timp1	TIMP metallopeptidase inhibitor 1 [Source:RGD Symbol;Acc:621675]
ENSRNOG00000009495	1.27527	5.85726	1.00566e-06	3.45016e-05	Src	SRC proto-oncogene, non-receptor tyrosine kinase [Source:RGD Symbol;Acc:620795]
ENSRNOG00000020426	1.27508	4.9186	8.74526e-05	0.00149814	Erf	Ets2 repressor factor [Source:RGD Symbol;Acc:1311991]
ENSRNOG00000027468	1.27119	1.6703	0.000763266	0.00818851	Slc6a15	solute carrier family 6 member 15 [Source:RGD Symbol;Acc:628664]
ENSRNOG00000019174	1.27057	2.42051	3.33523e-05	0.000680356	Chtf18	chromosome transmission fidelity factor 18 [Source:RGD Symbol;Acc:1310473]
ENSRNOG00000008224	1.26702	5.7262	9.15345e-06	0.000228943	Jdp2	Jun dimerization protein 2 [Source:RGD Symbol;Acc:621611]
ENSRNOG00000019354	1.2668	3.3308	0.000999504	0.00999071	Ptch1	patched 1 [Source:RGD Symbol;Acc:621425]
ENSRNOG00000016752	1.26532	5.42672	0.000285559	0.00385464	Crispld2	cysteine-rich secretory protein LCCL domain containing 2 [Source:RGD Symbol;Acc:620860]
ENSRNOG00000043044	1.26397	5.42557	6.15084e-05	0.00112745	Cnn2	calponin 2 [Source:RGD Symbol;Acc:1589807]
ENSRNOG00000008115	1.26344	5.03984	2.07411e-06	6.32137e-05	Arhgap11a	Rho GTPase activating protein 11A [Source:RGD Symbol;Acc:1309107]
ENSRNOG00000002061	1.26115	4.29685	1.12738e-06	3.78675e-05		protein tyrosine phosphatase, non-receptor type 13 [Source:RGD Symbol;Acc:1563360]
ENSRNOG00000017149	1.25813	1.35904	0.000970677	0.00976844	Fam131b	family with sequence similarity 131, member B [Source:RGD Symbol;Acc:1560653]
ENSRNOG00000056585	1.25207	4.76412	0.000896889	0.00924336	Fscn1	fascin actin-bundling protein 1 [Source:MGI Symbol;Acc:MGI:1352745]
ENSRNOG00000028335	1.25039	1.62774	1.15702e-05	0.000279581	Fat4	FAT atypical cadherin 4 [Source:RGD Symbol;Acc:1564291]
ENSRNOG00000021802	1.24941	4.11217	0.000627563	0.00717031	Isg15	ISG15 ubiquitin-like modifier [Source:RGD Symbol;Acc:1310312]
ENSRNOG00000055111	1.24717	3.15544	0.000159769	0.00240921	AABR07000658.1
ENSRNOG00000016516	1.24703	3.76977	9.28702e-07	3.22932e-05	Mbp	myelin basic protein [Source:RGD Symbol;Acc:3054]
ENSRNOG00000050819	1.24285	3.62745	0.000105636	0.00174893	Birc5	baculoviral IAP repeat-containing 5 [Source:RGD Symbol;Acc:70499]
ENSRNOG00000020193	1.24164	5.34881	6.2844e-05	0.00115029	Runx2	runt-related transcription factor 2 [Source:RGD Symbol;Acc:2282]
ENSRNOG00000057078	1.24116	4.90574	0.000357222	0.0046345	Ddit4	DNA-damage-inducible transcript 4 [Source:RGD Symbol;Acc:621731]
ENSRNOG00000010685	1.2401	3.71428	4.78291e-07	1.81566e-05	Tbx18	T-box18 [Source:RGD Symbol;Acc:1309856]
ENSRNOG00000027787	1.23671	2.88004	0.000270545	0.00369294	Cdc6	cell division cycle 6 [Source:RGD Symbol;Acc:1309157]
ENSRNOG00000027191	1.23642	2.82026	1.77847e-06	5.57935e-05	Birc6	baculoviral IAP repeat-containing 6 [Source:RGD Symbol;Acc:1307247]
ENSRNOG00000003732	1.23465	2.49156	9.7933e-05	0.00164044	Flrt2	fibronectin leucine rich transmembrane protein 2 [Source:RGD Symbol;Acc:1308574]
ENSRNOG00000008529	1.23116	3.51686	9.40581e-05	0.00159216	Foxs1	forkhead box S1 [Source:RGD Symbol;Acc:1310679]
ENSRNOG00000024365	1.22985	3.53896	0.000109134	0.00177753	Ect2	epithelial cell transforming 2 [Source:RGD Symbol;Acc:1308524]
ENSRNOG00000021903	1.22954	1.36581	0.000503947	0.00607463	Atad5	ATPase family, AAA domain containing 5 [Source:RGD Symbol;Acc:1561464]
ENSRNOG00000050090	1.22835	1.23221	5.34203e-05	0.0010021	Slc6a17	solute carrier family 6 member 17 [Source:RGD Symbol;Acc:1587185]
ENSRNOG00000047314	1.22066	5.5227	8.42891e-06	0.000214161	Tk1	thymidine kinase 1 [Source:RGD Symbol;Acc:621014]
ENSRNOG00000011654	1.22025	4.21	8.45889e-07	2.97359e-05	Plk4	polo-like kinase 4 [Source:RGD Symbol;Acc:1305390]
ENSRNOG00000012843	1.21928	0.212627	0.000636242	0.00723725	Aspg	asparaginase [Source:RGD Symbol;Acc:708388]
ENSRNOG00000014336	1.21859	4.43501	4.92156e-07	1.85731e-05	Mcm5	minichromosome maintenance complex component 5 [Source:RGD Symbol;Acc:1306616]
ENSRNOG00000008168	1.21413	2.54903	0.000162234	0.00244035	Wnt5b	wingless-type MMTV integration site family, member 5B [Source:RGD Symbol;Acc:628850]
ENSRNOG00000001501	1.21308	3.99129	0.0007657	0.00820777	Snrpa	small nuclear ribonucleoprotein polypeptide A [Source:RGD Symbol;Acc:1307416]
ENSRNOG00000002105	1.2129	1.80213	0.00050094	0.00604663	Cdc7	cell division cycle 7 [Source:RGD Symbol;Acc:1308351]
ENSRNOG00000046309	1.21266	4.03052	3.78486e-06	0.00010768	Gpr68	G protein-coupled receptor 68 [Source:RGD Symbol;Acc:1309559]
ENSRNOG00000014513	1.21151	1.9423	6.74319e-05	0.00122034	Exnef	exonuclease NEF-sp [Source:RGD Symbol;Acc:1305412]
ENSRNOG00000015529	1.2096	3.69252	2.1169e-06	6.40612e-05	Cdca3	cell division cycle associated 3 [Source:RGD Symbol;Acc:1359093]
ENSRNOG00000050071	1.20766	2.63135	3.92839e-05	0.000773086	Cdc45	cell division cycle 45 [Source:RGD Symbol;Acc:1590928]
ENSRNOG00000021856	1.20502	3.28175	4.82336e-07	1.82562e-05	Lat2	linker for activation of T cells family, member 2 [Source:RGD Symbol;Acc:631397]
ENSRNOG00000004921	1.20181	4.25889	9.81764e-07	3.38629e-05	Nusap1	nucleolar and spindle associated protein 1 [Source:RGD Symbol;Acc:1305764]
ENSRNOG00000027938	1.19931	3.28115	5.35398e-05	0.00100288	RGD1562037	similar to OTTHUMP00000046255 [Source:RGD Symbol;Acc:1562037]
ENSRNOG00000005936	1.19605	3.17651	2.01958e-05	0.00045232	Foxm1	forkhead box M1 [Source:RGD Symbol;Acc:61807]
ENSRNOG00000014347	1.19585	5.68531	1.82833e-06	5.69402e-05	Slc4a2	solute carrier family 4 member 2 [Source:RGD Symbol;Acc:3711]
ENSRNOG00000018076	1.19359	1.91066	7.64275e-05	0.00135635	Fmo5	flavin containing monooxygenase 5 [Source:RGD Symbol;Acc:628602]
ENSRNOG00000011445	1.19137	2.15628	2.97243e-05	0.000622174	Nkain1	Sodium/potassium transporting ATPase interacting 1 [Source:RGD Symbol;Acc:1561205]
ENSRNOG00000008133	1.19089	3.72935	0.000152088	0.00232315	Mfng	MFNG O-fucosylpeptide 3-beta-N-acetylglucosaminyltransferase [Source:RGD Symbol;Acc:735126]
ENSRNOG00000015859	1.18869	1.9544	0.000108514	0.00177753	Chdh	choline dehydrogenase [Source:RGD Symbol;Acc:735166]
ENSRNOG00000015131	1.18623	4.57205	0.000539875	0.00639625	Ube2c	ubiquitin-conjugating enzyme E2C [Source:RGD Symbol;Acc:1305382]
ENSRNOG00000061450	1.18611	2.80627	0.000971586	0.00976992	Homer2	homer scaffolding protein 2 [Source:RGD Symbol;Acc:620705]
ENSRNOG00000014571	1.18169	4.94738	0.000240223	0.00336495	Dbndd2	dysbindin domain containing 2 [Source:RGD Symbol;Acc:1559521]
ENSRNOG00000004195	1.18146	1.79955	0.000211319	0.00301941	Dtl	denticleless E3 ubiquitin protein ligase homolog [Source:RGD Symbol;Acc:1310439]
ENSRNOG00000019620	1.18079	4.08172	1.20323e-05	0.000288573	Pmf1	polyamine-modulated factor 1 [Source:RGD Symbol;Acc:1584694]
ENSRNOG00000049537	1.17941	5.60085	0.000134834	0.00210213	Rn50_13_0828.1
ENSRNOG00000005287	1.17825	1.08739	0.000948926	0.00961743	Syne3	spectrin repeat containing, nuclear envelope family member 3 [Source:RGD Symbol;Acc:1304563]
ENSRNOG00000003388	1.17718	4.53304	6.88455e-05	0.00124067	Cenpf	centromere protein F [Source:RGD Symbol;Acc:628667]
ENSRNOG00000019587	1.1767	3.46908	0.00036569	0.00472049	Ptprn	protein tyrosine phosphatase, receptor type, N [Source:RGD Symbol;Acc:620777]
ENSRNOG00000002474	1.1758	3.795	7.92893e-06	0.000202259	Tom1l1	target of myb1 like 1 membrane trafficking protein [Source:RGD Symbol;Acc:1562626]
ENSRNOG00000002841	1.17571	4.29119	4.33536e-05	0.00083524	Cdc42bpa	CDC42 binding protein kinase alpha [Source:RGD Symbol;Acc:621406]
ENSRNOG00000059894	1.17543	2.75599	1.38808e-05	0.000325602	Hmmr	hyaluronan-mediated motility receptor [Source:RGD Symbol;Acc:2805]
ENSRNOG00000033064	1.17396	4.71469	1.46578e-06	4.74935e-05	Edil3	EGF like repeats and discoidin domains 3 [Source:RGD Symbol;Acc:1588887]
ENSRNOG00000036762	1.17042	1.46578	0.000437745	0.00543727	Itpripl2	inositol 1,4,5-trisphosphate receptor interacting protein-like 2 [Source:RGD Symbol;Acc:1564255]
ENSRNOG00000004917	1.1686	2.29566	0.000965882	0.00975845	Rasal2	RAS protein activator like 2 [Source:RGD Symbol;Acc:1307566]
ENSRNOG00000032740	1.16788	1.5123	0.000389	0.00494184	Tmem258b	transmembrane protein 258 B [Source:RGD Symbol;Acc:1586604]
ENSRNOG00000003524	1.16209	6.30353	1.32732e-05	0.000314058	Lrrc59	leucine rich repeat containing 59 [Source:RGD Symbol;Acc:1305092]
ENSRNOG00000034200	1.16149	1.1424	0.000684553	0.00759818	Atp8a1	ATPase phospholipid transporting 8A1 [Source:RGD Symbol;Acc:1309619]
ENSRNOG00000010275	1.15969	2.64592	2.77023e-05	0.000589368	Slc17a9	solute carrier family 17 member 9 [Source:RGD Symbol;Acc:1311940]
ENSRNOG00000019189	1.1591	1.14623	0.000339101	0.00443528	Acat2	acetyl-CoA acetyltransferase 2 [Source:RGD Symbol;Acc:1359366]
ENSRNOG00000006327	1.15882	3.81808	0.000148926	0.00228028	Rcc2	regulator of chromosome condensation 2 [Source:RGD Symbol;Acc:1309986]
ENSRNOG00000004823	1.15805	1.65827	0.00013259	0.00207471	Dock4	dedicator of cytokinesis 4 [Source:RGD Symbol;Acc:1561724]
ENSRNOG00000046891	1.15674	4.88824	5.01438e-06	0.000137478	Hk1	hexokinase 1 [Source:RGD Symbol;Acc:2796]
ENSRNOG00000018992	1.15475	5.29262	3.33613e-07	1.31307e-05	Dpysl3	dihydropyrimidinase-like 3 [Source:RGD Symbol;Acc:2410]
ENSRNOG00000021441	1.15444	2.33963	0.000680701	0.00757193	Reln	reelin [Source:RGD Symbol;Acc:3553]
ENSRNOG00000022884	1.15436	4.52693	3.2669e-06	9.4622e-05	Cd84	CD84 molecule [Source:RGD Symbol;Acc:1564553]
ENSRNOG00000030183	1.15351	7.3008	8.79826e-06	0.000221789	Plod2	procollagen lysine, 2-oxoglutarate 5-dioxygenase 2 [Source:RGD Symbol;Acc:3353]
ENSRNOG00000037295	1.1486	1.78456	0.000114473	0.00184523	Poc1a	POC1 centriolar protein A [Source:RGD Symbol;Acc:1565004]
ENSRNOG00000018815	1.14795	3.69173	9.36068e-06	0.000232765	Plk1	polo-like kinase 1 [Source:RGD Symbol;Acc:3352]
ENSRNOG00000042519	1.14554	3.26277	4.13545e-05	0.000803969	Peak1	pseudopodium-enriched atypical kinase 1 [Source:RGD Symbol;Acc:1312026]
ENSRNOG00000011150	1.1454	6.60904	2.38377e-05	0.000516657	Arsb	arylsulfatase B [Source:RGD Symbol;Acc:2158]
ENSRNOG00000001214	1.14514	5.24599	2.58931e-05	0.000554648	Pfkl	phosphofructokinase, liver type [Source:RGD Symbol;Acc:3311]
ENSRNOG00000012543	1.14481	4.65535	1.96729e-05	0.000443625	Mcm3	minichromosome maintenance complex component 3 [Source:RGD Symbol;Acc:1305168]
ENSRNOG00000018338	1.14032	4.8803	7.47703e-05	0.00133062	Vwa1	von Willebrand factor A domain containing 1 [Source:RGD Symbol;Acc:1311476]
ENSRNOG00000032768	1.14015	0.892414	0.000835974	0.00877773	Stxbp4	syntaxin binding protein 4 [Source:RGD Symbol;Acc:1307903]
ENSRNOG00000036693	1.13885	3.45325	9.76201e-05	0.00163734	Slc25a10	solute carrier family 25 member 10 [Source:RGD Symbol;Acc:621430]
ENSRNOG00000031993	1.13866	5.1411	2.67794e-05	0.000570839	Prim1	primase (DNA) subunit 1 [Source:RGD Symbol;Acc:621380]
ENSRNOG00000026212	1.13582	4.46643	1.91732e-05	0.000434701	Micall1	MICAL-like 1 [Source:RGD Symbol;Acc:1305415]
ENSRNOG00000009334	1.13487	4.23992	0.000199272	0.0028891	Knstrn	kinetochore-localized astrin/SPAG5 binding protein [Source:RGD Symbol;Acc:1303240]
ENSRNOG00000001441	1.13399	5.50617	0.000115727	0.00186058	Tmem120a	transmembrane protein 120A [Source:RGD Symbol;Acc:1311474]
ENSRNOG00000002657	1.13371	3.03531	2.19652e-05	0.000486539	Pla2g4a	phospholipase A2 group IVA [Source:RGD Symbol;Acc:67366]
ENSRNOG00000005038	1.13259	1.99346	0.000546774	0.00646009	Ube2t	ubiquitin-conjugating enzyme E2T [Source:RGD Symbol;Acc:1310816]
ENSRNOG00000022261	1.13204	2.39789	8.26367e-05	0.00143869	Cenpu	centromere protein U [Source:RGD Symbol;Acc:1562566]
ENSRNOG00000014722	1.13141	2.78328	0.000987599	0.0099154	Raph1	Ras association (RalGDS/AF-6) and pleckstrin homology domains 1 [Source:RGD Symbol;Acc:1308387]
ENSRNOG00000000924	1.13132	3.42187	2.68708e-06	7.94421e-05	Slc7a1	solute carrier family 7 member 1 [Source:RGD Symbol;Acc:3716]
ENSRNOG00000020385	1.12902	3.49322	1.64017e-06	5.19629e-05	Fads3	fatty acid desaturase 3 [Source:RGD Symbol;Acc:628876]
ENSRNOG00000010513	1.12831	3.99891	1.72921e-05	0.000397626	Tfpi2	tissue factor pathway inhibitor 2 [Source:RGD Symbol;Acc:628629]
ENSRNOG00000052725	1.12394	2.25944	3.08543e-05	0.000637839	RGD1566029	similar to mKIAA1644 protein [Source:RGD Symbol;Acc:1566029]
ENSRNOG00000017593	1.12327	1.66189	0.00020778	0.00297776	Mtr	5-methyltetrahydrofolate-homocysteine methyltransferase [Source:RGD Symbol;Acc:621283]
ENSRNOG00000003517	1.123	1.67016	7.61004e-05	0.00135242	Tbx2	T-box 2 [Source:RGD Symbol;Acc:1311014]
ENSRNOG00000019014	1.11914	2.20753	0.000258264	0.00355938	Ndst1	N-deacetylase and N-sulfotransferase 1 [Source:RGD Symbol;Acc:69303]
ENSRNOG00000053502	1.11811	2.99781	1.35449e-05	0.000318888	Arhgef17	Rho guanine nucleotide exchange factor (GEF) 17 [Source:MGI Symbol;Acc:MGI:2673002]
ENSRNOG00000005277	1.11749	5.11678	0.000659195	0.00740642	Ptprv	protein tyrosine phosphatase, receptor type, V [Source:RGD Symbol;Acc:621123]
ENSRNOG00000009491	1.11728	1.43009	0.000368493	0.00474712	Phc3	polyhomeotic homolog 3 [Source:RGD Symbol;Acc:1307998]
ENSRNOG00000007779	1.11714	2.7888	0.000811141	0.00857311	Kank4	KN motif and ankyrin repeat domains 4 [Source:RGD Symbol;Acc:1307635]
ENSRNOG00000003802	1.11695	4.57253	0.000320654	0.00425032	Pttg1	pituitary tumor-transforming 1 [Source:RGD Symbol;Acc:68359]
ENSRNOG00000024594	1.11674	3.22228	3.39065e-05	0.000689468	Fhdc1	FH2 domain containing 1 [Source:RGD Symbol;Acc:1311955]
ENSRNOG00000007906	1.11638	3.47625	3.02123e-05	0.000629309	Bub1b	BUB1 mitotic checkpoint serine/threonine kinase B [Source:RGD Symbol;Acc:619791]
ENSRNOG00000049604	1.1151	2.94103	7.2011e-05	0.00129047	Mvk	mevalonate kinase [Source:RGD Symbol;Acc:621295]
ENSRNOG00000008067	1.11501	1.21126	0.000770671	0.00824727	Rcor1	REST corepressor 1 [Source:RGD Symbol;Acc:7505493]
ENSRNOG00000018384	1.11434	3.29366	3.06595e-05	0.000636069	Adam12	ADAM metallopeptidase domain 12 [Source:RGD Symbol;Acc:1583652]
ENSRNOG00000039183	1.11322	1.90474	0.000387013	0.00492635	RGD1310335	similar to RIKEN cDNA C330027C09 [Source:RGD Symbol;Acc:1310335]
ENSRNOG00000009470	1.11209	3.16735	3.84006e-05	0.000758028	Flnb	filamin B [Source:RGD Symbol;Acc:1311915]
ENSRNOG00000030486	1.1105	2.19527	0.000108945	0.00177753	Prdm6	PR/SET domain 6 [Source:RGD Symbol;Acc:1559594]
ENSRNOG00000007436	1.10826	2.10774	0.000583312	0.00674885	LOC100158225	hypothetical protein LOC100158225 [Source:RGD Symbol;Acc:2293499]
ENSRNOG00000009995	1.10643	2.06953	8.57977e-05	0.00147941	Rapgef6	Rap guanine nucleotide exchange factor 6 [Source:RGD Symbol;Acc:1307645]
ENSRNOG00000007657	1.10478	3.8164	0.00067068	0.00748303	Col27a1	collagen type XXVII alpha 1 chain [Source:RGD Symbol;Acc:735115]
ENSRNOG00000003848	1.10377	4.16011	1.84257e-06	5.72445e-05	Med12	mediator complex subunit 12 [Source:RGD Symbol;Acc:1585896]
ENSRNOG00000039976	1.10227	3.70547	2.14633e-05	0.000478117	Ptk7	protein tyrosine kinase 7 [Source:RGD Symbol;Acc:1310472]
ENSRNOG00000002852	1.09845	2.27576	0.000859143	0.00893328	Myo19	myosin XIX [Source:RGD Symbol;Acc:1559961]
ENSRNOG00000005917	1.09842	4.29532	0.000627386	0.00717031	Pawr	pro-apoptotic WT1 regulator [Source:RGD Symbol;Acc:69065]
ENSRNOG00000005575	1.09731	3.31079	0.000522999	0.00625406	Abi3	ABI family, member 3 [Source:RGD Symbol;Acc:1311794]
ENSRNOG00000016413	1.0966	4.94026	8.29766e-06	0.000211245	Pstpip1	proline-serine-threonine phosphatase-interacting protein 1 [Source:RGD Symbol;Acc:1307557]
ENSRNOG00000057451	1.09173	6.04111	1.57342e-06	5.00957e-05	Itga5	integrin subunit alpha 5 [Source:RGD Symbol;Acc:2925]
ENSRNOG00000000503	1.09082	4.08328	7.14678e-06	0.000184508	Ppard	peroxisome proliferator-activated receptor delta [Source:RGD Symbol;Acc:3370]
ENSRNOG00000001397	1.089	2.72376	2.97893e-05	0.000622518	Rbm19	RNA binding motif protein 19 [Source:RGD Symbol;Acc:1308928]
ENSRNOG00000006996	1.08047	3.34641	2.81921e-05	0.000595936	Mms22l	MMS22-like, DNA repair protein [Source:RGD Symbol;Acc:1304693]
ENSRNOG00000038572	1.07971	1.94508	0.000521932	0.00624711	Ncapg	non-SMC condensin I complex, subunit G [Source:RGD Symbol;Acc:1562646]
ENSRNOG00000000323	1.07797	2.56103	1.32908e-05	0.000314058	Prdm1	PR/SET domain 1 [Source:RGD Symbol;Acc:1311765]
ENSRNOG00000005868	1.07766	2.4087	7.93645e-05	0.0013988	Ttc21b	tetratricopeptide repeat domain 21B [Source:RGD Symbol;Acc:1565122]
ENSRNOG00000031163	1.0748	3.60139	2.33213e-05	0.000507179	Nfkbiz	NFKB inhibitor zeta [Source:RGD Symbol;Acc:1310834]
ENSRNOG00000009835	1.07458	1.63098	0.000669492	0.00748303	Tram1l1	translocation associated membrane protein 1-like 1 [Source:RGD Symbol;Acc:1306398]
ENSRNOG00000047734	1.07414	2.53189	4.00836e-05	0.000785211	Chst2	carbohydrate sulfotransferase 2 [Source:RGD Symbol;Acc:1306988]
ENSRNOG00000050190	1.07272	5.93443	3.14316e-06	9.16588e-05	Eng	endoglin [Source:RGD Symbol;Acc:1593188]
ENSRNOG00000019614	1.07146	2.37984	2.59558e-05	0.000555065	Ptpn22	protein tyrosine phosphatase, non-receptor type 22 [Source:RGD Symbol;Acc:1307992]
ENSRNOG00000012937	1.06958	4.76296	8.31468e-05	0.0014456	Wwp2	WW domain containing E3 ubiquitin protein ligase 2 [Source:RGD Symbol;Acc:1310091]
ENSRNOG00000006604	1.06776	7.53926	0.000139999	0.00216948	Thy1	Thy-1 cell surface antigen [Source:RGD Symbol;Acc:3860]
ENSRNOG00000056297	1.06768	4.55572	1.4115e-06	4.58507e-05	Fmnl3	formin-like 3 [Source:RGD Symbol;Acc:1583854]
ENSRNOG00000013825	1.06636	2.56825	4.02511e-05	0.00078729	Rap1gap	Rap1 GTPase-activating protein [Source:RGD Symbol;Acc:1309908]
ENSRNOG00000038905	1.06434	2.56957	0.000902501	0.00926399	AABR07048397.1
ENSRNOG00000047896	1.06307	6.90296	0.000236045	0.00331729	Kctd10	potassium channel tetramerization domain containing 10 [Source:RGD Symbol;Acc:1591979]
ENSRNOG00000037225	1.06249	3.32277	0.000271447	0.00370131	Tyms	thymidylate synthetase [Source:RGD Symbol;Acc:3921]
ENSRNOG00000001928	1.06216	1.81765	0.000571146	0.00665611	Il1rap	interleukin 1 receptor accessory protein [Source:RGD Symbol;Acc:2893]
ENSRNOG00000015257	1.06121	2.2543	0.000102166	0.00170133	Coro2b	coronin 2B [Source:RGD Symbol;Acc:1561953]
ENSRNOG00000008956	1.05655	3.31684	0.000118872	0.00190181	Cdkn2c	cyclin-dependent kinase inhibitor 2C [Source:RGD Symbol;Acc:2325]
ENSRNOG00000007078	1.0526	2.65547	0.000566697	0.00663438	Wisp1	WNT1 inducible signaling pathway protein 1 [Source:RGD Symbol;Acc:69431]
ENSRNOG00000002488	1.05199	5.08768	0.000967119	0.00976132	Galnt10	polypeptide N-acetylgalactosaminyltransferase 10 [Source:RGD Symbol;Acc:69409]
ENSRNOG00000003908	1.05184	3.77711	4.30387e-06	0.00012005	Cep128	centrosomal protein 128 [Source:RGD Symbol;Acc:1595693]
ENSRNOG00000053047	1.05119	5.84773	0.000207939	0.00297776	Top2a	topoisomerase (DNA) II alpha [Source:RGD Symbol;Acc:62048]
ENSRNOG00000003650	1.05075	3.80119	2.13798e-05	0.000477085	Nt5c	5', 3'-nucleotidase, cytosolic [Source:RGD Symbol;Acc:2321875]
ENSRNOG00000058916	1.05049	1.70587	0.000800725	0.00848398	Ccdc65	coiled-coil domain containing 65 [Source:RGD Symbol;Acc:1595842]
ENSRNOG00000016433	1.04925	4.98516	0.000548216	0.00647117	Prrc1	proline-rich coiled-coil 1 [Source:RGD Symbol;Acc:1565632]
ENSRNOG00000014504	1.04795	3.73789	0.000197743	0.00287343	Il1r1	interleukin 1 receptor type 1 [Source:RGD Symbol;Acc:2892]
ENSRNOG00000001229	1.04362	6.66707	0.000126609	0.00199817	Col18a1	collagen type XVIII alpha 1 chain [Source:RGD Symbol;Acc:70936]
ENSRNOG00000005620	1.04259	5.54704	3.72712e-05	0.000740289	Lcp2	lymphocyte cytosolic protein 2 [Source:RGD Symbol;Acc:619743]
ENSRNOG00000017429	1.04233	2.48541	7.75263e-05	0.00137206	Lat	linker for activation of T cells [Source:RGD Symbol;Acc:620802]
ENSRNOG00000008400	1.04129	2.69936	4.34617e-05	0.000836068	Pml	promyelocytic leukemia [Source:RGD Symbol;Acc:1562602]
ENSRNOG00000043007	1.04043	7.39555	0.000409977	0.0051674	Rcn3	reticulocalbin 3 [Source:RGD Symbol;Acc:1359365]
ENSRNOG00000039587	1.03862	2.18199	0.000434909	0.00541252	Wdr13	WD repeat domain 13 [Source:RGD Symbol;Acc:1560982]
ENSRNOG00000018986	1.036	3.10618	0.000145143	0.00223034	Fbxl19	F-box and leucine-rich repeat protein 19 [Source:RGD Symbol;Acc:1310989]
ENSRNOG00000053026	1.03507	2.97096	7.03399e-05	0.00126405	Shcbp1	SHC binding and spindle associated 1 [Source:RGD Symbol;Acc:1590844]
ENSRNOG00000009339	1.0339	3.9374	7.78766e-05	0.00137636	Cenpe	centromere protein E [Source:RGD Symbol;Acc:1307115]
ENSRNOG00000014143	1.03334	1.46301	0.000291894	0.00392588	Col24a1	collagen type XXIV alpha 1 chain [Source:RGD Symbol;Acc:1565539]
ENSRNOG00000006877	1.03297	5.09667	0.00083671	0.00877826	Efnb1	ephrin B1 [Source:RGD Symbol;Acc:2540]
ENSRNOG00000010240	1.03271	3.46611	1.55647e-05	0.000361141	Fam46a	family with sequence similarity 46, member A [Source:RGD Symbol;Acc:1311381]
ENSRNOG00000015269	1.03134	2.18577	0.000108781	0.00177753	Atf7	activating transcription factor 7 [Source:RGD Symbol;Acc:1304940]
ENSRNOG00000031232	1.02744	5.92811	0.000322548	0.00426661	Nrp2	neuropilin 2 [Source:RGD Symbol;Acc:621442]
ENSRNOG00000003217	1.02525	6.60299	5.61016e-05	0.00104628	Lgals3bp	galectin 3 binding protein [Source:RGD Symbol;Acc:620837]
ENSRNOG00000018279	1.02398	5.55809	9.53022e-05	0.00160898	Sfxn1	sideroflexin 1 [Source:RGD Symbol;Acc:1308482]
ENSRNOG00000010274	1.02339	5.35147	3.50055e-05	0.000704006	Smc4	structural maintenance of chromosomes 4 [Source:RGD Symbol;Acc:1306680]
ENSRNOG00000013598	1.022	2.82721	6.74068e-05	0.00122034	Melk	maternal embryonic leucine zipper kinase [Source:RGD Symbol;Acc:1308974]
ENSRNOG00000012513	1.02116	5.00026	0.000121517	0.00193447	Pdk3	pyruvate dehydrogenase kinase 3 [Source:RGD Symbol;Acc:1593276]
ENSRNOG00000025302	1.01833	2.81818	0.000565331	0.00662444	Cdca2	cell division cycle associated 2 [Source:RGD Symbol;Acc:1311003]
ENSRNOG00000002548	1.01726	9.08173	0.000715405	0.00784561	Tnn	tenascin N [Source:RGD Symbol;Acc:1306002]
ENSRNOG00000034013	1.01723	2.61277	0.000243974	0.00340635	Acaca	acetyl-CoA carboxylase alpha [Source:RGD Symbol;Acc:621248]
ENSRNOG00000013653	1.01556	6.19054	0.000216887	0.00308524	Pdlim7	PDZ and LIM domain 7 [Source:RGD Symbol;Acc:628769]
ENSRNOG00000051056	1.01522	5.10132	6.42107e-06	0.000169524	Fndc4
ENSRNOG00000018109	1.01379	4.64929	0.00083114	0.00873412	Clic4	chloride intracellular channel 4 [Source:RGD Symbol;Acc:61857]
ENSRNOG00000016544	1.01366	2.45884	0.000942131	0.00955731	Arhgef28	Rho guanine nucleotide exchange factor 28 [Source:RGD Symbol;Acc:1307061]
ENSRNOG00000018929	1.01093	2.73754	0.000421305	0.00528884	Kif20b	kinesin family member 20B [Source:RGD Symbol;Acc:1308497]
ENSRNOG00000011431	1.01053	1.93988	0.000347266	0.00452805	Mfhas1	malignant fibrous histiocytoma amplified sequence 1 [Source:RGD Symbol;Acc:1308812]
ENSRNOG00000009207	1.00964	2.28471	0.000155551	0.00236199	Spata2	spermatogenesis associated 2 [Source:RGD Symbol;Acc:620754]
ENSRNOG00000021184	1.00862	4.81418	0.000285572	0.00385464	Mark2	microtubule affinity regulating kinase 2 [Source:RGD Symbol;Acc:708483]
ENSRNOG00000001265	1.00531	3.0284	0.000169627	0.00252786	Mad1l1	MAD1 mitotic arrest deficient like 1 [Source:RGD Symbol;Acc:1596881]
ENSRNOG00000020770	0.99949	3.18559	0.000162433	0.00244049	Arl4d	ADP-ribosylation factor like GTPase 4D [Source:RGD Symbol;Acc:1306875]
ENSRNOG00000008941	0.996068	5.75114	2.22519e-05	0.000490575	Ets1	ETS proto-oncogene 1, transcription factor [Source:RGD Symbol;Acc:2583]
ENSRNOG00000018824	0.99546	4.0647	0.000222589	0.00315236	Slc7a5	solute carrier family 7 member 5 [Source:RGD Symbol;Acc:620639]
ENSRNOG00000017753	0.992363	2.85451	0.000347072	0.00452805	Ercc2	ERCC excision repair 2, TFIIH core complex helicase subunit [Source:RGD Symbol;Acc:1309109]
ENSRNOG00000014293	0.990953	2.66097	0.000556762	0.00654795	Nkd1	naked cuticle homolog 1 [Source:RGD Symbol;Acc:1308491]
ENSRNOG00000008622	0.989335	2.0799	0.000617192	0.00707703	Creb5	cAMP responsive element binding protein 5 [Source:RGD Symbol;Acc:1566107]
ENSRNOG00000008134	0.989102	2.36681	6.79803e-05	0.00122853	Mefv	MEFV, pyrin innate immunity regulator [Source:RGD Symbol;Acc:61889]
ENSRNOG00000008425	0.986979	4.35874	0.000108848	0.00177753	Nav1	neuron navigator 1 [Source:RGD Symbol;Acc:1590261]
ENSRNOG00000016779	0.98683	5.06954	6.25621e-06	0.000165512	Fam120a	family with sequence similarity 120A [Source:RGD Symbol;Acc:1306643]
ENSRNOG00000018012	0.985987	2.70606	0.000127355	0.00200749	Tulp4	tubby like protein 4 [Source:RGD Symbol;Acc:1564487]
ENSRNOG00000028137	0.985305	6.0793	0.000110579	0.00179372	Mki67	marker of proliferation Ki-67 [Source:RGD Symbol;Acc:1305476]
ENSRNOG00000028036	0.984888	3.63711	1.26001e-05	0.000301065	Adamts7	ADAM metallopeptidase with thrombospondin type 1 motif, 7 [Source:RGD Symbol;Acc:1306713]
ENSRNOG00000054890	0.983286	8.74652	0.000114246	0.00184389	Flna	filamin A [Source:RGD Symbol;Acc:1560614]
ENSRNOG00000019181	0.981842	3.26037	3.03426e-05	0.000630998	Synpo	synaptopodin [Source:RGD Symbol;Acc:620668]
ENSRNOG00000005391	0.980797	2.50433	8.76093e-05	0.00149882	Prex2	phosphatidylinositol-3,4,5-trisphosphate-dependent Rac exchange factor 2 [Source:RGD Symbol;Acc:1307865]
ENSRNOG00000014483	0.976556	2.99261	4.25775e-05	0.000825096	Ino80	INO80 complex subunit [Source:RGD Symbol;Acc:1310969]
ENSRNOG00000003703	0.97518	5.19054	7.21252e-05	0.00129071	Mcm6	minichromosome maintenance complex component 6 [Source:RGD Symbol;Acc:61967]
ENSRNOG00000009503	0.974791	3.64283	4.04379e-05	0.000788539	Depdc1	DEP domain containing 1 [Source:RGD Symbol;Acc:1306987]
ENSRNOG00000058586	0.970265	2.44955	0.000325851	0.00430144	Tyro3	TYRO3 protein tyrosine kinase [Source:RGD Symbol;Acc:3923]
ENSRNOG00000043143	0.967841	4.25126	1.17789e-05	0.000284087	Eml1	echinoderm microtubule associated protein like 1 [Source:RGD Symbol;Acc:1306374]
ENSRNOG00000019240	0.966645	3.94342	0.000394425	0.00499676	Ampd2	adenosine monophosphate deaminase 2 [Source:RGD Symbol;Acc:2110]
ENSRNOG00000033192	0.966328	2.43274	0.000226527	0.00320107	Osmr	oncostatin M receptor [Source:RGD Symbol;Acc:1302983]
ENSRNOG00000022402	0.961247	4.91469	0.000106316	0.0017534	Luzp1	leucine zipper protein 1 [Source:RGD Symbol;Acc:61839]
ENSRNOG00000051854	0.959147	4.10744	0.000193737	0.00281842	Enpep	glutamyl aminopeptidase [Source:RGD Symbol;Acc:621228]
ENSRNOG00000008749	0.958573	8.20841	0.000182844	0.00267511	Col5a1	collagen type V alpha 1 chain [Source:RGD Symbol;Acc:70920]
ENSRNOG00000004956	0.958289	1.97218	0.00029664	0.00398554	Jade2	jade family PHD finger 2 [Source:RGD Symbol;Acc:1309152]
ENSRNOG00000021918	0.955311	2.60832	0.000136427	0.00212248	Cep76	centrosomal protein 76 [Source:RGD Symbol;Acc:1305183]
ENSRNOG00000020506	0.955257	1.69578	0.000543472	0.00642699	Khnyn	KH and NYN domain containing [Source:RGD Symbol;Acc:1565688]
ENSRNOG00000058094	0.953343	2.08825	0.000487293	0.0059097	Lyst	lysosomal trafficking regulator [Source:MGI Symbol;Acc:MGI:107448]
ENSRNOG00000007349	0.953337	3.73043	0.000411994	0.00517757	Ascc2	activating signal cointegrator 1 complex subunit 2 [Source:RGD Symbol;Acc:1561422]
ENSRNOG00000042333	0.953317	2.57437	0.000227209	0.00320717	Dnal1	dynein, axonemal, light chain 1 [Source:RGD Symbol;Acc:1591349]
ENSRNOG00000004806	0.951837	2.23393	0.000752451	0.00809958	Strn	striatin [Source:RGD Symbol;Acc:3782]
ENSRNOG00000024077	0.951005	3.3341	9.56562e-05	0.00161283	Fbxo5	F-box protein 5 [Source:RGD Symbol;Acc:1309405]
ENSRNOG00000011977	0.948214	3.60564	0.000601273	0.00693166	Sema5a	semaphorin 5A [Source:RGD Symbol;Acc:1308650]
ENSRNOG00000008738	0.947344	4.01985	0.000238531	0.00334491	Tp53i11	tumor protein p53 inducible protein 11 [Source:RGD Symbol;Acc:1308395]
ENSRNOG00000007300	0.947175	6.68207	0.000850227	0.00886212	C1qtnf6	C1q and tumor necrosis factor related protein 6 [Source:RGD Symbol;Acc:1307057]
ENSRNOG00000008533	0.945716	2.77435	0.000198512	0.00288135	Ago2	argonaute 2, RISC catalytic component [Source:RGD Symbol;Acc:621255]
ENSRNOG00000006681	0.943048	3.51177	0.00083081	0.00873412	Rdh10	retinol dehydrogenase 10 [Source:RGD Symbol;Acc:727793]
ENSRNOG00000016683	0.941893	2.66568	0.0006282	0.00717121	Zfp668	zinc finger protein 668 [Source:RGD Symbol;Acc:1308623]
ENSRNOG00000028872	0.941814	6.43626	0.000466558	0.00570134	Rai14	retinoic acid induced 14 [Source:RGD Symbol;Acc:1305942]
ENSRNOG00000004861	0.940658	2.19368	0.000697847	0.00771238	Itga4	integrin subunit alpha 4 [Source:RGD Symbol;Acc:1593249]
ENSRNOG00000019681	0.938951	3.23016	0.000282047	0.00382552	Pold1	DNA polymerase delta 1, catalytic subunit [Source:RGD Symbol;Acc:621839]
ENSRNOG00000016256	0.936509	6.05659	5.19491e-05	0.000981678	Myo9b	myosin IXb [Source:RGD Symbol;Acc:3146]
ENSRNOG00000054474	0.934899	3.07936	0.00031717	0.00421285	Mastl	microtubule associated serine/threonine kinase-like [Source:RGD Symbol;Acc:1309186]
ENSRNOG00000005935	0.934667	4.01293	1.78838e-05	0.000409763	A3galt2	alpha 1,3-galactosyltransferase 2 [Source:RGD Symbol;Acc:727913]
ENSRNOG00000006000	0.934503	3.86112	3.61909e-05	0.000723311	Cdk12	cyclin-dependent kinase 12 [Source:RGD Symbol;Acc:621111]
ENSRNOG00000020433	0.932157	7.83443	0.000109414	0.00177841	Actn4	actinin alpha 4 [Source:RGD Symbol;Acc:61816]
ENSRNOG00000060703	0.931291	2.08929	0.000669852	0.00748303	Troap	trophinin associated protein [Source:RGD Symbol;Acc:1306870]
ENSRNOG00000000511	0.930643	4.42611	4.7269e-05	0.000899865	Srpk1	SRSF protein kinase 1 [Source:RGD Symbol;Acc:1308272]
ENSRNOG00000019484	0.930615	3.05291	0.000203748	0.00294071	Slc6a9	solute carrier family 6 member 9 [Source:RGD Symbol;Acc:621243]
ENSRNOG00000005907	0.929705	3.70393	0.000101677	0.00169872	Rad18	RAD18 E3 ubiquitin protein ligase [Source:RGD Symbol;Acc:1306993]
ENSRNOG00000005854	0.929097	1.94957	0.000969019	0.00976707	Angpt1	angiopoietin 1 [Source:RGD Symbol;Acc:628896]
ENSRNOG00000059947	0.928954	6.56755	0.000175492	0.00259715	Sdc1	syndecan 1 [Source:RGD Symbol;Acc:3648]
ENSRNOG00000025580	0.926573	2.8931	0.000150499	0.00230161	LOC679539	similar to ubiquitin-conjugating enzyme E2 variant 1 [Source:RGD Symbol;Acc:1587144]
ENSRNOG00000054901	0.924775	2.46444	0.000444041	0.00548362	Rif1	replication timing regulatory factor 1 [Source:RGD Symbol;Acc:1562474]
ENSRNOG00000029912	0.924194	5.08344	0.000679442	0.00756764	Gp1bb	glycoprotein Ib platelet beta subunit [Source:RGD Symbol;Acc:621050]
ENSRNOG00000050224	0.922548	4.62241	0.000423396	0.00530527	Stambpl1	STAM binding protein-like 1 [Source:RGD Symbol;Acc:1583011]
ENSRNOG00000015496	0.922384	8.10784	0.000174085	0.0025823	Tpm4	tropomyosin 4 [Source:RGD Symbol;Acc:3899]
ENSRNOG00000005933	0.922214	3.99161	6.43548e-05	0.00117626	Yap1	yes-associated protein 1 [Source:RGD Symbol;Acc:1306035]
ENSRNOG00000007687	0.920946	3.38141	0.000731904	0.00796528	Sema7a	semaphorin 7A (John Milton Hagen blood group) [Source:RGD Symbol;Acc:1305192]
ENSRNOG00000058288	0.920595	4.29295	4.63454e-05	0.000884907	Tcf19	transcription factor 19 [Source:RGD Symbol;Acc:1302974]
ENSRNOG00000022171	0.920184	3.36988	0.000222294	0.00315166	Dhx37	DEAH-box helicase 37 [Source:RGD Symbol;Acc:1306837]
ENSRNOG00000050106	0.916925	4.12206	0.000773619	0.00827192	Rcc1	regulator of chromosome condensation 1 [Source:RGD Symbol;Acc:1592835]
ENSRNOG00000004057	0.916795	3.34178	0.000819168	0.0086437	Ccdc88a	coiled coil domain containing 88A [Source:RGD Symbol;Acc:1306694]
ENSRNOG00000004588	0.915911	2.24301	0.00057404	0.00668377	Zbed4	zinc finger, BED-type containing 4 [Source:RGD Symbol;Acc:1305949]
ENSRNOG00000017146	0.915741	4.28058	1.86883e-05	0.000427432	Nfatc1	nuclear factor of activated T-cells 1 [Source:RGD Symbol;Acc:2319357]
ENSRNOG00000027035	0.913635	3.47256	0.000115577	0.00186058	Sgo2	shugoshin 2 [Source:RGD Symbol;Acc:1308450]
ENSRNOG00000030404	0.911835	2.41031	0.000922424	0.00941577	Arrb1	arrestin, beta 1 [Source:RGD Symbol;Acc:2156]
ENSRNOG00000011167	0.90953	3.3652	0.00013359	0.00208781	Wdhd1	WD repeat and HMG-box DNA binding protein 1 [Source:RGD Symbol;Acc:1310200]
ENSRNOG00000010448	0.907929	6.66197	0.000410895	0.00516881	Ptbp1	polypyrimidine tract binding protein 1 [Source:RGD Symbol;Acc:62047]
ENSRNOG00000051487	0.907002	5.23353	0.000112754	0.0018267	Kremen1	kringle containing transmembrane protein 1 [Source:RGD Symbol;Acc:620789]
ENSRNOG00000057760	0.906433	2.81007	0.00088756	0.00916193	Stil	Scl/Tal1 interrupting locus [Source:RGD Symbol;Acc:1304972]
ENSRNOG00000051965	0.904462	4.32179	5.22755e-05	0.000986393	Smad4	SMAD family member 4 [Source:RGD Symbol;Acc:3033]
ENSRNOG00000006236	0.904317	3.19383	0.000207646	0.00297776	Dsn1	DSN1 homolog, MIS12 kinetochore complex component [Source:RGD Symbol;Acc:1565179]
ENSRNOG00000018524	0.903187	5.48172	0.000516497	0.00619928	Ezr	ezrin [Source:RGD Symbol;Acc:621161]
ENSRNOG00000047699	0.902948	5.72485	0.000992672	0.00995076	Snai2	snail family transcriptional repressor 2 [Source:RGD Symbol;Acc:3722]
ENSRNOG00000021062	0.9029	6.94609	0.000108814	0.00177753	Fxyd5	FXYD domain-containing ion transport regulator 5 [Source:RGD Symbol;Acc:620827]
ENSRNOG00000015713	0.902825	7.1688	0.000123147	0.00195556	Parva	parvin, alpha [Source:RGD Symbol;Acc:71021]
ENSRNOG00000030568	0.901995	3.89367	4.30818e-05	0.000831252	Rgs12	regulator of G-protein signaling 12 [Source:RGD Symbol;Acc:3564]
ENSRNOG00000011407	0.901232	3.03284	0.000398335	0.00503551	Prag1	PEAK1 related kinase activating pseudokinase 1 [Source:RGD Symbol;Acc:1311793]
ENSRNOG00000010760	0.900302	1.98353	0.000783555	0.0083434	E2f5	E2F transcription factor 5 [Source:RGD Symbol;Acc:621357]
ENSRNOG00000008196	0.899601	2.8266	0.000951531	0.00963622	Parp12	poly (ADP-ribose) polymerase family, member 12 [Source:RGD Symbol;Acc:1308628]
ENSRNOG00000021150	0.898832	4.35134	2.84064e-05	0.000598493	Plcb3	phospholipase C beta 3 [Source:RGD Symbol;Acc:61993]
ENSRNOG00000020743	0.89826	2.04708	0.000328296	0.00432481	Cyp2s1	cytochrome P450, family 2, subfamily s, polypeptide 1 [Source:RGD Symbol;Acc:1306078]
ENSRNOG00000001414	0.897242	7.72576	0.000270139	0.00369294	Serpine1	serpin family E member 1 [Source:RGD Symbol;Acc:3249]
ENSRNOG00000047035	0.89648	3.43122	3.98176e-05	0.000781192	Fadd	Fas associated via death domain [Source:RGD Symbol;Acc:628700]
ENSRNOG00000003917	0.894907	3.88466	0.000489727	0.0059336	Uck2	uridine-cytidine kinase 2 [Source:RGD Symbol;Acc:620742]
ENSRNOG00000009832	0.893016	4.99286	0.000351442	0.00456875	Slc39a14	solute carrier family 39 member 14 [Source:RGD Symbol;Acc:1307026]
ENSRNOG00000017930	0.892988	4.86302	0.000455158	0.005594	Lpcat1	lysophosphatidylcholine acyltransferase 1 [Source:RGD Symbol;Acc:1311599]
ENSRNOG00000002871	0.892779	2.97287	0.000870033	0.00901574	Rbm25l1	RNA binding motif protein 25-like 1 [Source:RGD Symbol;Acc:1565486]
ENSRNOG00000047575	0.89105	2.63117	0.000237098	0.00332845	Dhx34	DExH-box helicase 34 [Source:RGD Symbol;Acc:1584452]
ENSRNOG00000025604	0.890615	3.44295	0.000315919	0.00420276	Atad2	ATPase family, AAA domain containing 2 [Source:RGD Symbol;Acc:1304849]
ENSRNOG00000008986	0.890328	2.7734	0.000743148	0.0080399	Diaph3	diaphanous-related formin 3 [Source:RGD Symbol;Acc:1593287]
ENSRNOG00000028834	0.890063	6.19158	0.000183613	0.0026833	Polr2a	RNA polymerase II subunit A [Source:RGD Symbol;Acc:1587326]
ENSRNOG00000055082	0.888058	5.04457	0.000492323	0.00595943	Maz	MYC associated zinc finger protein [Source:RGD Symbol;Acc:1594632]
ENSRNOG00000004936	0.885408	7.68373	0.000172548	0.00256246	Sdc2	syndecan 2 [Source:RGD Symbol;Acc:3649]
ENSRNOG00000037853	0.882525	4.75064	0.000726401	0.00793089	Rarres1	retinoic acid receptor responder 1 [Source:RGD Symbol;Acc:1309509]
ENSRNOG00000007234	0.881895	5.27838	0.000433374	0.0054039	Cyp51	cytochrome P450, family 51 [Source:RGD Symbol;Acc:2481]
ENSRNOG00000047219	0.880097	3.34483	0.000441397	0.0054664	Ube3b	ubiquitin protein ligase E3B [Source:RGD Symbol;Acc:1583074]
ENSRNOG00000010124	0.878741	3.65202	6.6464e-05	0.00120793	Trim2	tripartite motif-containing 2 [Source:RGD Symbol;Acc:1310981]
ENSRNOG00000000867	0.877818	5.03478	0.000106911	0.00176095	Vars	valyl-tRNA synthetase [Source:RGD Symbol;Acc:3950]
ENSRNOG00000014786	0.875369	3.3544	0.000726194	0.00793089	Ccne1	cyclin E1 [Source:RGD Symbol;Acc:2294]
ENSRNOG00000052157	0.873974	2.43819	0.00045306	0.0055789	Nav3	neuron navigator 3 [Source:RGD Symbol;Acc:1306259]
ENSRNOG00000011452	0.873023	2.37829	0.000637008	0.00723789	Aldoc	aldolase, fructose-bisphosphate C [Source:RGD Symbol;Acc:2091]
ENSRNOG00000008628	0.872811	2.46084	0.000314195	0.00419068	Ica1	islet cell autoantigen 1 [Source:RGD Symbol;Acc:621465]
ENSRNOG00000030830	0.866103	3.91274	0.000167085	0.00249869	Mex3d	mex-3 RNA binding family member D [Source:RGD Symbol;Acc:1310576]
ENSRNOG00000020525	0.863786	8.80362	0.000818885	0.0086437	Col5a3	collagen type V alpha 3 chain [Source:RGD Symbol;Acc:70922]
ENSRNOG00000019697	0.861284	3.62586	0.000246243	0.00343376	Ankrd28	ankyrin repeat domain 28 [Source:RGD Symbol;Acc:1559931]
ENSRNOG00000013304	0.85904	3.79364	0.000919137	0.00938969	Arg1	arginase 1 [Source:RGD Symbol;Acc:2150]
ENSRNOG00000013045	0.858208	3.27962	0.000405981	0.00512207	Setd7	SET domain containing (lysine methyltransferase) 7 [Source:RGD Symbol;Acc:1586346]
ENSRNOG00000030266	0.854165	4.39145	0.000900792	0.00926127	Plekhg2	pleckstrin homology and RhoGEF domain containing G2 [Source:RGD Symbol;Acc:1310112]
ENSRNOG00000009734	0.854114	4.13698	0.000321154	0.00425256	Akr1b10	aldo-keto reductase family 1 member B10 [Source:RGD Symbol;Acc:1308277]
ENSRNOG00000004563	0.85161	2.90628	0.000205606	0.00296087	Sec24a	SEC24 homolog A, COPII coat complex component [Source:RGD Symbol;Acc:1309451]
ENSRNOG00000016408	0.849854	5.26237	0.000453514	0.00557913	Kirrel	kin of IRRE like (Drosophila) [Source:RGD Symbol;Acc:727883]
ENSRNOG00000000599	0.847846	5.7707	0.000187983	0.00274092	Lama4	laminin subunit alpha 4 [Source:RGD Symbol;Acc:1560062]
ENSRNOG00000016688	0.845554	3.021	0.000731645	0.00796528	Ston1	stonin 1 [Source:RGD Symbol;Acc:727878]
ENSRNOG00000059705	0.844171	3.57934	0.000881413	0.00911315	Elmo1	engulfment and cell motility 1 [Source:RGD Symbol;Acc:1308182]
ENSRNOG00000026178	0.842031	5.2006	0.000179731	0.00264768	Adpgk	ADP-dependent glucokinase [Source:RGD Symbol;Acc:1306103]
ENSRNOG00000046252	0.842013	4.19635	0.000124907	0.00198106	Tbl2	transducin (beta)-like 2 [Source:RGD Symbol;Acc:1595038]
ENSRNOG00000001249	0.837501	8.88354	0.000402298	0.00508059	Col6a1	collagen type VI alpha 1 chain [Source:RGD Symbol;Acc:1565398]
ENSRNOG00000017895	0.833422	6.54111	0.000534905	0.00635122	Eno1	enolase 1 [Source:RGD Symbol;Acc:2553]
ENSRNOG00000003882	0.831597	2.54878	0.000670243	0.00748303	Cep350	centrosomal protein 350 [Source:RGD Symbol;Acc:621162]
ENSRNOG00000011987	0.831032	3.59336	0.000360086	0.00466223	Cd2ap	CD2-associated protein [Source:RGD Symbol;Acc:727803]
ENSRNOG00000023338	0.83056	4.83936	0.000581131	0.00674796	Tspan2	tetraspanin 2 [Source:RGD Symbol;Acc:620982]
ENSRNOG00000015030	0.830242	4.37667	0.00058516	0.0067589	Tjp2	tight junction protein 2 [Source:RGD Symbol;Acc:619807]
ENSRNOG00000007286	0.826253	3.31996	0.000301022	0.00403512	Mdm1	Mdm1 nuclear protein [Source:RGD Symbol;Acc:1561092]
ENSRNOG00000014524	0.825192	5.1517	0.000707303	0.00777075	S1pr3	sphingosine-1-phosphate receptor 3 [Source:RGD Symbol;Acc:1583843]
ENSRNOG00000000017	0.824162	2.94315	0.000410707	0.00516881	Steap1	STEAP family member 1 [Source:RGD Symbol;Acc:1311543]
ENSRNOG00000005248	0.822337	4.23878	0.000704023	0.00776058	Slc1a4	solute carrier family 1 member 4 [Source:RGD Symbol;Acc:735146]
ENSRNOG00000015948	0.821728	4.35161	8.667e-05	0.0014907	Slc1a5	solute carrier family 1 member 5 [Source:RGD Symbol;Acc:708512]
ENSRNOG00000002833	0.820959	3.59453	0.000167481	0.00250169	Gsk3b	glycogen synthase kinase 3 beta [Source:RGD Symbol;Acc:70982]
ENSRNOG00000005153	0.819359	3.93234	0.000874948	0.00905359	LOC690422	hypothetical protein LOC690422 [Source:RGD Symbol;Acc:1596085]
ENSRNOG00000018273	0.819165	7.4932	0.000507159	0.00610447	Ncl	nucleolin [Source:RGD Symbol;Acc:3153]
ENSRNOG00000008747	0.817611	4.47015	0.000480176	0.00583994	Plekha5	pleckstrin homology domain containing A5 [Source:RGD Symbol;Acc:621175]
ENSRNOG00000000697	0.815735	6.94041	0.000436002	0.00542087	Coro1c	coronin 1C [Source:RGD Symbol;Acc:1564490]
ENSRNOG00000002418	0.814734	5.63816	7.99985e-05	0.00140462	Tgfb2	transforming growth factor, beta 2 [Source:RGD Symbol;Acc:70491]
ENSRNOG00000006542	0.81175	7.94126	0.000704701	0.00776139	Atp6v0c	ATPase H+ transporting V0 subunit C [Source:RGD Symbol;Acc:621394]
ENSRNOG00000053881	0.810574	2.88221	0.000649787	0.00731995	Baz2a	bromodomain adjacent to zinc finger domain, 2A [Source:RGD Symbol;Acc:1305037]
ENSRNOG00000015430	0.803406	3.27706	0.000252031	0.00349979	Nlgn2	neuroligin 2 [Source:RGD Symbol;Acc:621118]
ENSRNOG00000015692	0.80141	3.48188	0.00024183	0.00338378	Taok1	TAO kinase 1 [Source:RGD Symbol;Acc:708455]
ENSRNOG00000000723	0.801178	2.61387	0.000471847	0.00575501	RT1-CE5	RT1 class I, locus CE5 [Source:RGD Symbol;Acc:1595868]
ENSRNOG00000027016	0.800716	2.68766	0.000649673	0.00731995	Cobll1	cordon-bleu WH2 repeat protein-like 1 [Source:RGD Symbol;Acc:1308954]
ENSRNOG00000011857	0.800189	5.14339	0.000258909	0.00356063	Mtpn	myotrophin [Source:RGD Symbol;Acc:619806]
ENSRNOG00000061085	0.798382	3.15962	0.000629947	0.00717838	Fancd2	Fanconi anemia, complementation group D2 [Source:RGD Symbol;Acc:1303172]
ENSRNOG00000047924	0.797246	2.33828	0.00082264	0.0086732	Zbtb7c	zinc finger and BTB domain containing 7C [Source:RGD Symbol;Acc:1591841]
ENSRNOG00000002280	0.797077	4.2215	0.00027034	0.00369294	Sh3bgrl	SH3 domain binding glutamate-rich protein like [Source:RGD Symbol;Acc:1560520]
ENSRNOG00000026994	0.795885	5.16374	0.000991447	0.00994625	Afg3l1	AFG3(ATPase family gene 3)-like 1 (S. cerevisiae) [Source:RGD Symbol;Acc:1309722]
ENSRNOG00000003948	0.794148	4.0647	0.000225753	0.00319365	Llgl1	LLGL1, scribble cell polarity complex component [Source:RGD Symbol;Acc:3012]
ENSRNOG00000054080	0.793757	3.86011	0.000285695	0.00385464	Cgnl1	cingulin-like 1 [Source:RGD Symbol;Acc:1304623]
ENSRNOG00000018574	0.792749	3.69661	0.000262228	0.00359471	Qsox2	quiescin sulfhydryl oxidase 2 [Source:RGD Symbol;Acc:1584720]
ENSRNOG00000036839	0.792273	6.48221	0.000847077	0.00885807	Hnrnpa1	heterogeneous nuclear ribonucleoprotein A1 [Source:RGD Symbol;Acc:69234]
ENSRNOG00000007377	0.791201	3.79888	0.000383727	0.00490325	Slit3	slit guidance ligand 3 [Source:RGD Symbol;Acc:69311]
ENSRNOG00000001736	0.788976	2.56635	0.000848483	0.00886212	Bdh1	3-hydroxybutyrate dehydrogenase 1 [Source:RGD Symbol;Acc:620131]
ENSRNOG00000012956	0.788917	6.34173	0.000621705	0.00712241	Tgm2	transglutaminase 2 [Source:RGD Symbol;Acc:621081]
ENSRNOG00000052637	0.786969	3.43634	0.000301273	0.00403512	Samd1	sterile alpha motif domain containing 1 [Source:RGD Symbol;Acc:7529921]
ENSRNOG00000017071	0.785703	5.35712	0.000934478	0.0095086	Babam1	BRISC and BRCA1 A complex member 1 [Source:RGD Symbol;Acc:1359516]
ENSRNOG00000010308	0.784558	3.65953	0.000738127	0.00801261	Nr2f2	nuclear receptor subfamily 2, group F, member 2 [Source:RGD Symbol;Acc:69305]
ENSRNOG00000004793	0.78417	5.64547	0.000473423	0.00576875	Ncln	nicalin [Source:RGD Symbol;Acc:1309355]
ENSRNOG00000055925	0.783974	6.1543	0.000481982	0.00585635	Zc3h7b	zinc finger CCCH-type containing 7B [Source:RGD Symbol;Acc:1307064]
ENSRNOG00000028227	0.781393	3.81114	0.000252838	0.0035072	Pbrm1	polybromo 1 [Source:RGD Symbol;Acc:1565549]
ENSRNOG00000009311	0.780949	2.90628	0.000637426	0.00723789	Fstl3	follistatin like 3 [Source:RGD Symbol;Acc:621811]
ENSRNOG00000025418	0.7772	3.59403	0.000746109	0.00806514	Armc9	armadillo repeat containing 9 [Source:RGD Symbol;Acc:1305615]
ENSRNOG00000008713	0.776607	4.24579	0.000347606	0.00452805	Slc41a2	solute carrier family 41 member 2 [Source:RGD Symbol;Acc:1307292]
ENSRNOG00000047628	0.772319	4.0451	0.000246473	0.00343376	Khsrp	KH-type splicing regulatory protein [Source:RGD Symbol;Acc:621828]
ENSRNOG00000025198	0.770996	3.68042	0.000763193	0.00818851	Gas2l3	growth arrest-specific 2 like 3 [Source:RGD Symbol;Acc:1594151]
ENSRNOG00000017837	0.769586	2.66138	0.000707367	0.00777075	Znf48	zinc finger protein 48 [Source:RGD Symbol;Acc:9115869]
ENSRNOG00000013780	0.769316	3.06886	0.000690381	0.00764303	Nf1	neurofibromin 1 [Source:RGD Symbol;Acc:3168]
ENSRNOG00000056011	0.768644	3.1864	0.000604482	0.00695615	LOC314140	ribose-phosphate pyrophosphokinase I -like [Source:RGD Symbol;Acc:1359636]
ENSRNOG00000017979	0.767379	4.54083	0.00072689	0.00793089	Mrto4	MRT4 homolog, ribosome maturation factor [Source:RGD Symbol;Acc:1311709]
ENSRNOG00000016467	0.763228	3.34903	0.000464653	0.00569433	Kctd1	potassium channel tetramerization domain containing 1 [Source:RGD Symbol;Acc:621566]
ENSRNOG00000002750	0.763137	2.92412	0.000916179	0.00937439	Rc3h1	ring finger and CCCH-type domains 1 [Source:RGD Symbol;Acc:1563512]
ENSRNOG00000013491	0.762793	4.01627	0.000758153	0.00814729	Setx	senataxin [Source:RGD Symbol;Acc:1565575]
ENSRNOG00000032546	0.760418	3.41498	0.000568446	0.0066488	Dot1l	DOT1 like histone lysine methyltransferase [Source:RGD Symbol;Acc:1306644]
ENSRNOG00000012240	0.757941	5.55465	0.000209028	0.00299001	Supt6h	SPT6 homolog, histone chaperone [Source:RGD Symbol;Acc:1309290]
ENSRNOG00000001090	0.753867	4.14091	0.000258552	0.00355952	Stard13	StAR-related lipid transfer domain containing 13 [Source:RGD Symbol;Acc:1564816]
ENSRNOG00000000940	0.751741	3.55269	0.000457385	0.00561599	Flt1	FMS-related tyrosine kinase 1 [Source:RGD Symbol;Acc:2621]
ENSRNOG00000037514	0.751369	5.0514	0.000528452	0.0062958	Qser1	glutamine and serine rich 1 [Source:RGD Symbol;Acc:1311804]
ENSRNOG00000010217	0.747786	3.81607	0.000563535	0.00662143	Prrc2b	proline-rich coiled-coil 2B [Source:RGD Symbol;Acc:1595906]
ENSRNOG00000056756	0.745854	6.40207	0.000937793	0.00953473	Actn1	actinin, alpha 1 [Source:RGD Symbol;Acc:70907]
ENSRNOG00000002746	0.744236	8.50052	0.000802734	0.00849825	Fstl1	follistatin-like 1 [Source:RGD Symbol;Acc:68955]
ENSRNOG00000017466	0.744052	5.45893	0.000613173	0.00704353	Kif5b	kinesin family member 5B [Source:RGD Symbol;Acc:621559]
ENSRNOG00000001253	0.743586	6.49838	0.000571064	0.00665611	Eif3b	eukaryotic translation initiation factor 3, subunit B [Source:RGD Symbol;Acc:1309018]
ENSRNOG00000017600	0.740856	5.0603	0.000304356	0.00407215	Ptpn9	protein tyrosine phosphatase, non-receptor type 9 [Source:RGD Symbol;Acc:628726]
ENSRNOG00000004168	0.738744	4.77576	0.000792028	0.00841964	Slc35e4	solute carrier family 35, member E4 [Source:RGD Symbol;Acc:708484]
ENSRNOG00000010890	0.738614	6.81335	0.000606372	0.00697165	Bmp1	bone morphogenetic protein 1 [Source:RGD Symbol;Acc:620739]
ENSRNOG00000039576	0.738031	3.23503	0.000776235	0.00828536	Suv39h1l1	suppressor of variegation 3-9 homolog 1 (Drosophila)-like 1 [Source:RGD Symbol;Acc:1565028]
ENSRNOG00000022771	0.736142	3.38439	0.000530902	0.00631911	Arhgap23	Rho GTPase activating protein 23 [Source:RGD Symbol;Acc:1309742]
ENSRNOG00000005865	0.734108	4.72747	0.000859063	0.00893328	Ssfa2	sperm specific antigen 2 [Source:RGD Symbol;Acc:1310767]
ENSRNOG00000010944	0.731587	5.4054	0.000662159	0.00743322	Hyou1	hypoxia up-regulated 1 [Source:RGD Symbol;Acc:621146]
ENSRNOG00000020594	0.730105	3.98015	0.000495174	0.00598265	Rhbdf1	rhomboid 5 homolog 1 [Source:RGD Symbol;Acc:1305075]
ENSRNOG00000008659	0.728325	4.15437	0.000535084	0.00635122	Arhgap21	Rho GTPase activating protein 21 [Source:RGD Symbol;Acc:1311028]
ENSRNOG00000020297	0.723119	3.58115	0.000384429	0.00490325	Gon4l	gon-4 like [Source:RGD Symbol;Acc:1564691]
ENSRNOG00000029242	0.722314	3.75277	0.000897675	0.00924403	Plekho2	pleckstrin homology domain containing O2 [Source:RGD Symbol;Acc:1305718]
ENSRNOG00000002767	0.719519	3.53249	0.000636232	0.00723725	Dlg3	discs large MAGUK scaffold protein 3 [Source:RGD Symbol;Acc:68423]
ENSRNOG00000019799	0.712001	3.70857	0.000666633	0.0074769	Pcdhgc3	protocadherin gamma subfamily C, 3 [Source:EntrezGene;Acc:116782]
ENSRNOG00000056944	0.706284	4.13818	0.000811003	0.00857311	Arhgap24	Rho GTPase activating protein 24 [Source:RGD Symbol;Acc:1306669]
ENSRNOG00000059344	0.702193	5.06772	0.000970535	0.00976844	Tpcn1	two pore segment channel 1 [Source:RGD Symbol;Acc:708494]
ENSRNOG00000054557	0.699728	3.62497	0.000824653	0.00868729	Lsm14b	LSM family member 14B [Source:RGD Symbol;Acc:1563798]
ENSRNOG00000000831	0.696731	3.4003	0.000688178	0.00763182	Gtf2h4	general transcription factor 2H subunit 4 [Source:RGD Symbol;Acc:1303309]
ENSRNOG00000012237	0.696561	4.0902	0.000898428	0.00924437	Rdx	radixin [Source:RGD Symbol;Acc:1359472]
ENSRNOG00000010396	0.692832	3.98887	0.000999772	0.00999071	Eya3	EYA transcriptional coactivator and phosphatase 3 [Source:RGD Symbol;Acc:1309932]
ENSRNOG00000011739	0.692474	4.71615	0.000615183	0.00706029	Dennd4a	DENN domain containing 4A [Source:RGD Symbol;Acc:1562639]
ENSRNOG00000026243	0.690697	4.74204	0.000523639	0.00625588	Ap2a1	adaptor-related protein complex 2, alpha 1 subunit [Source:RGD Symbol;Acc:1306254]
ENSRNOG00000005492	0.68731	5.08671	0.000625844	0.00716343	Hpcal1	hippocalcin-like 1 [Source:RGD Symbol;Acc:708375]
ENSRNOG00000060550	0.6786	4.17248	0.000750079	0.00808761	Epn2	epsin 2 [Source:RGD Symbol;Acc:619773]
ENSRNOG00000061928	0.676812	4.28008	0.000726881	0.00793089	Myo1e	myosin IE [Source:RGD Symbol;Acc:3144]
ENSRNOG00000032293	0.67127	4.2677	0.000742083	0.00803516	Polg	DNA polymerase gamma, catalytic subunit [Source:RGD Symbol;Acc:620057]

## Sheet: S_vs_E.down_in_E.GENES
EnsemblID	logFC	logCPM	PValue	FDR	GeneName	Description
ENSRNOG00000016043	-7.14671	1.98623	2.5181e-21	8.07742e-19	Aqp4	aquaporin 4 [Source:RGD Symbol;Acc:2143]
ENSRNOG00000006471	-5.86324	10.4416	2.25842e-18	3.96956e-16	Pvalb	parvalbumin [Source:RGD Symbol;Acc:3457]
ENSRNOG00000019627	-5.77561	7.24711	4.80285e-32	6.84727e-29	Mybpc2	myosin binding protein C, fast-type [Source:RGD Symbol;Acc:1311596]
ENSRNOG00000036690	-5.1143	5.46234	6.85174e-20	1.56991e-17	Ppp1r27	protein phosphatase 1, regulatory subunit 27 [Source:RGD Symbol;Acc:1308861]
ENSRNOG00000052016	-4.98468	3.3446	3.25255e-10	2.16236e-08	AABR07010868.1
ENSRNOG00000001765	-4.93989	3.87435	6.71427e-13	6.42916e-11	Slc51a	solute carrier family 51, alpha subunit [Source:RGD Symbol;Acc:1311100]
ENSRNOG00000030848	-4.85066	3.17101	1.33413e-12	1.23153e-10	Myl2	myosin light chain 2 [Source:RGD Symbol;Acc:1564245]
ENSRNOG00000026679	-4.79721	2.94745	3.07976e-27	1.97582e-24	Scn4b	sodium voltage-gated channel beta subunit 4 [Source:RGD Symbol;Acc:631404]
ENSRNOG00000048169	-4.65279	4.15913	2.31248e-18	4.00965e-16	Tuba8	tubulin, alpha 8 [Source:RGD Symbol;Acc:1566041]
ENSRNOG00000013532	-4.56627	8.35832	1.2028e-31	1.54331e-28	Pgam2	phosphoglycerate mutase 2 [Source:RGD Symbol;Acc:3313]
ENSRNOG00000007999	-4.56097	4.79417	2.65801e-28	1.89472e-25	Abra	actin-binding Rho activating protein [Source:RGD Symbol;Acc:708493]
ENSRNOG00000004583	-4.54609	10.5083	3.71428e-39	1.5886e-35	Mb	myoglobin [Source:RGD Symbol;Acc:620411]
ENSRNOG00000019745	-4.50822	8.03807	5.12221e-19	1.01112e-16	Actn3	actinin alpha 3 [Source:RGD Symbol;Acc:621792]
ENSRNOG00000036827	-4.49953	4.18383	1.69314e-29	1.3578e-26	Ppp1r1a	protein phosphatase 1, regulatory (inhibitor) subunit 1A [Source:RGD Symbol;Acc:62018]
ENSRNOG00000042634	-4.44712	1.58703	3.8373e-15	4.68918e-13	Serpina12	serpin family A member 12 [Source:RGD Symbol;Acc:708485]
ENSRNOG00000017637	-4.33895	1.89575	1.00516e-06	3.45016e-05	Fbp2	fructose-bisphosphatase 2 [Source:RGD Symbol;Acc:620930]
ENSRNOG00000008210	-4.29969	4.99057	2.61915e-10	1.76876e-08	Ky	kyphoscoliosis peptidase [Source:RGD Symbol;Acc:1305407]
ENSRNOG00000059350	-4.29711	5.64311	7.47854e-27	4.56939e-24	Ppp1r3a	protein phosphatase 1, regulatory subunit 3A [Source:RGD Symbol;Acc:1561312]
ENSRNOG00000016837	-4.19643	10.2127	8.74667e-39	2.80571e-35	Ckm	creatine kinase, M-type [Source:RGD Symbol;Acc:2358]
ENSRNOG00000014641	-4.1228	5.383	2.0295e-11	1.55932e-09	Rpl3l	ribosomal protein L3-like [Source:RGD Symbol;Acc:1306315]
ENSRNOG00000040122	-4.03077	5.66448	7.26581e-19	1.39146e-16	Myoz1	myozenin 1 [Source:RGD Symbol;Acc:1561064]
ENSRNOG00000008942	-4.03021	0.388162	5.36254e-07	2.00603e-05	RGD1304963	similar to hypothetical protein MGC38716 [Source:RGD Symbol;Acc:1304963]
ENSRNOG00000016543	-3.86295	6.8209	1.30612e-43	1.67589e-39	Trim63	tripartite motif containing 63 [Source:RGD Symbol;Acc:619964]
ENSRNOG00000031685	-3.81098	8.93777	5.01185e-35	1.28614e-31	AY172581.12
ENSRNOG00000021088	-3.79804	6.50192	4.64877e-31	5.42258e-28	Tmod4	tropomodulin 4 [Source:RGD Symbol;Acc:1308940]
ENSRNOG00000058324	-3.74668	3.46047	2.26548e-09	1.2977e-07	LOC102550325	uncharacterized LOC102550325 [Source:RGD Symbol;Acc:7747030]
ENSRNOG00000028238	-3.74369	6.38414	7.60872e-23	2.87139e-20	Sh3bgr	SH3 domain binding glutamate-rich protein [Source:RGD Symbol;Acc:1563599]
ENSRNOG00000049695	-3.74087	10.3718	9.47027e-16	1.22741e-13	Myh2	myosin heavy chain 2 [Source:RGD Symbol;Acc:620354]
ENSRNOG00000017226	-3.73435	6.16492	5.15413e-21	1.53797e-18	Slc2a4	solute carrier family 2 member 4 [Source:RGD Symbol;Acc:2711]
ENSRNOG00000023803	-3.71746	6.58017	2.88598e-18	4.87238e-16	Cmya5	cardiomyopathy associated 5 [Source:RGD Symbol;Acc:1582992]
ENSRNOG00000008050	-3.7098	5.97056	5.31277e-31	5.68068e-28	Stac3	SH3 and cysteine rich domain 3 [Source:RGD Symbol;Acc:1308964]
ENSRNOG00000006978	-3.70727	1.91234	4.96775e-18	8.06851e-16	Mterf2	mitochondrial transcription termination factor 2 [Source:RGD Symbol;Acc:1311836]
ENSRNOG00000021294	-3.69513	0.658092	1.76843e-06	5.56147e-05	Mstn	myostatin [Source:RGD Symbol;Acc:3115]
ENSRNOG00000007516	-3.67956	3.51244	5.9489e-21	1.69623e-18	Smtnl1	smoothelin-like 1 [Source:RGD Symbol;Acc:1311701]
ENSRNOG00000053679	-3.67512	3.09276	8.1134e-10	4.91052e-08	AABR07060862.1
ENSRNOG00000016618	-3.67291	3.94521	8.08847e-23	2.96523e-20	Tmem52	transmembrane protein 52 [Source:RGD Symbol;Acc:2318502]
ENSRNOG00000055450	-3.65788	5.8116	8.47903e-19	1.57673e-16	Ckmt2	creatine kinase, mitochondrial 2 [Source:MGI Symbol;Acc:MGI:1923972]
ENSRNOG00000012303	-3.65736	7.14924	8.89245e-21	2.37706e-18	Apobec2	apolipoprotein B mRNA editing enzyme catalytic subunit 2 [Source:RGD Symbol;Acc:1308727]
ENSRNOG00000061655	-3.6492	-0.354936	8.82874e-07	3.09513e-05	AABR07022055.1
ENSRNOG00000005491	-3.64408	0.320019	8.27915e-12	7.03509e-10	Best3	bestrophin 3 [Source:RGD Symbol;Acc:1305439]
ENSRNOG00000019404	-3.64161	5.13366	1.83029e-20	4.6969e-18	Hhatl	hedgehog acyltransferase-like [Source:RGD Symbol;Acc:1311911]
ENSRNOG00000013346	-3.63168	1.07552	1.17765e-10	8.48901e-09	Asb14	ankyrin repeat and SOCS box-containing 14 [Source:RGD Symbol;Acc:1596812]
ENSRNOG00000046763	-3.60832	6.79596	5.37152e-40	3.4461e-36	Adssl1	adenylosuccinate synthase like 1 [Source:RGD Symbol;Acc:1590342]
ENSRNOG00000016684	-3.60824	0.41849	1.3539e-06	4.42033e-05	Wnk2	WNK lysine deficient protein kinase 2 [Source:RGD Symbol;Acc:1307284]
ENSRNOG00000023162	-3.59178	1.29012	1.42253e-10	1.00288e-08	Car14	carbonic anhydrase 14 [Source:RGD Symbol;Acc:1599277]
ENSRNOG00000000920	-3.58154	2.20576	4.70985e-18	7.7477e-16	Phkg1	phosphorylase kinase, gamma 1 [Source:RGD Symbol;Acc:3325]
ENSRNOG00000020955	-3.54943	5.86067	4.92402e-09	2.67712e-07	Myl3	myosin light chain 3 [Source:RGD Symbol;Acc:3142]
ENSRNOG00000002459	-3.54854	1.11593	6.33908e-13	6.11554e-11	Fbxo40	F-box protein 40 [Source:RGD Symbol;Acc:1309781]
ENSRNOG00000021128	-3.54335	2.94658	6.40129e-19	1.24447e-16	Kcnj11	potassium voltage-gated channel subfamily J member 11 [Source:RGD Symbol;Acc:69247]
ENSRNOG00000025781	-3.54328	1.15791	8.69701e-11	6.37665e-09	Sec31b	SEC31 homolog B, COPII coat complex component [Source:RGD Symbol;Acc:1598329]
ENSRNOG00000047860	-3.53776	1.16403	1.31902e-15	1.67568e-13	Plin5	perilipin 5 [Source:RGD Symbol;Acc:1589602]
ENSRNOG00000006110	-3.52811	5.45009	1.19169e-27	8.04765e-25	Jph1	junctophilin 1 [Source:RGD Symbol;Acc:1308789]
ENSRNOG00000055049	-3.52632	3.60001	4.8182e-10	3.04544e-08	Aldh1a2	aldehyde dehydrogenase 1 family, member A2 [Source:RGD Symbol;Acc:620250]
ENSRNOG00000001873	-3.52254	-0.280031	0.00014076	0.00217864	P2rx6	purinergic receptor P2X 6 [Source:RGD Symbol;Acc:3243]
ENSRNOG00000020276	-3.44342	10.6667	1.29078e-26	7.52816e-24	Tnni2	troponin I2, fast skeletal type [Source:RGD Symbol;Acc:62050]
ENSRNOG00000021735	-3.43085	3.71182	2.87196e-18	4.87238e-16	Akr1cl	aldo-keto reductase family 1, member C-like [Source:RGD Symbol;Acc:1307514]
ENSRNOG00000018656	-3.42309	7.18763	2.33726e-23	9.67399e-21	Ampd1	adenosine monophosphate deaminase 1 [Source:RGD Symbol;Acc:2109]
ENSRNOG00000060511	-3.42259	4.58093	5.87886e-20	1.39688e-17	Tcap	titin-cap [Source:MGI Symbol;Acc:MGI:1330233]
ENSRNOG00000059166	-3.39842	7.74404	1.12485e-19	2.44627e-17	Ldb3	LIM domain binding 3 [Source:RGD Symbol;Acc:1564875]
ENSRNOG00000056493	-3.39643	8.86749	2.65335e-20	6.42361e-18	Mybpc1	myosin binding protein C, slow type [Source:RGD Symbol;Acc:735102]
ENSRNOG00000004078	-3.37448	9.6643	6.35332e-21	1.77216e-18	Eno3	enolase 3 [Source:RGD Symbol;Acc:2555]
ENSRNOG00000016917	-3.36359	0.543913	5.32532e-09	2.87097e-07	Clcn1	chloride voltage-gated channel 1 [Source:RGD Symbol;Acc:2360]
ENSRNOG00000028357	-3.35842	2.91046	8.82166e-18	1.34751e-15	Lrrc14b	leucine rich repeat containing 14B [Source:RGD Symbol;Acc:1564978]
ENSRNOG00000042897	-3.35691	4.068	1.4642e-12	1.33242e-10	Nmrk2	nicotinamide riboside kinase 2 [Source:RGD Symbol;Acc:6486791]
ENSRNOG00000036794	-3.35192	2.28546	6.2792e-15	7.52976e-13	Asb16	ankyrin repeat and SOCS box-containing 16 [Source:RGD Symbol;Acc:1563878]
ENSRNOG00000017248	-3.33863	4.00291	1.41344e-14	1.61927e-12	Prkag3	protein kinase AMP-activated non-catalytic subunit gamma 3 [Source:RGD Symbol;Acc:1308698]
ENSRNOG00000047124	-3.32719	7.50537	1.38497e-30	1.36697e-27	Atp2a1	ATPase sarcoplasmic/endoplasmic reticulum Ca2+ transporting 1 [Source:RGD Symbol;Acc:621293]
ENSRNOG00000020244	-3.32324	1.64912	1.93327e-11	1.50795e-09	Perm1	PPARGC1 and ESRR induced regulator, muscle 1 [Source:RGD Symbol;Acc:1304931]
ENSRNOG00000013840	-3.31827	1.79564	3.57062e-08	1.72885e-06	Ankrd2	ankyrin repeat domain 2 [Source:RGD Symbol;Acc:1305104]
ENSRNOG00000017645	-3.31327	12.5323	1.45403e-26	8.11161e-24	Mylpf	myosin light chain, phosphorylatable, fast skeletal muscle [Source:RGD Symbol;Acc:3141]
ENSRNOG00000043201	-3.30219	6.87839	5.24996e-11	3.89377e-09	Coq8a	coenzyme Q8A [Source:RGD Symbol;Acc:1308245]
ENSRNOG00000042309	-3.29147	3.15757	2.19152e-20	5.40758e-18	Soga3	SOGA family member 3 [Source:RGD Symbol;Acc:1307525]
ENSRNOG00000003694	-3.27589	1.69347	9.13767e-13	8.55806e-11	Prox1	prospero homeobox 1 [Source:RGD Symbol;Acc:1306890]
ENSRNOG00000015157	-3.24678	5.24567	1.13125e-25	5.806e-23	Smtnl2	smoothelin-like 2 [Source:RGD Symbol;Acc:1585960]
ENSRNOG00000012827	-3.24592	5.9872	2.589e-14	2.83927e-12	Mlf1	myeloid leukemia factor 1 [Source:RGD Symbol;Acc:1306854]
ENSRNOG00000001943	-3.22986	0.366735	1.62753e-09	9.44922e-08	Retnlg	resistin-like gamma [Source:RGD Symbol;Acc:727934]
ENSRNOG00000020332	-3.20145	11.4381	8.22217e-30	7.03324e-27	Tnnt3	troponin T3, fast skeletal type [Source:RGD Symbol;Acc:3883]
ENSRNOG00000003452	-3.19	2.52222	5.71622e-18	9.1681e-16	Asb9	ankyrin repeat and SOCS box-containing 9 [Source:RGD Symbol;Acc:1560537]
ENSRNOG00000030389	-3.18728	0.278669	5.06549e-07	1.90602e-05	Lrrc30	leucine rich repeat containing 30 [Source:RGD Symbol;Acc:1563832]
ENSRNOG00000016368	-3.17625	3.60399	6.94252e-15	8.2481e-13	Ppp1r14c	protein phosphatase 1, regulatory (inhibitor) subunit 14c [Source:RGD Symbol;Acc:620538]
ENSRNOG00000014656	-3.17168	7.16253	1.7882e-33	2.86805e-30	Cox8b	cytochrome c oxidase, subunit VIIIb [Source:RGD Symbol;Acc:2386]
ENSRNOG00000016962	-3.17089	2.14298	2.18338e-14	2.41508e-12	Neu2	neuraminidase 2 [Source:RGD Symbol;Acc:3164]
ENSRNOG00000056457	-3.13675	4.12478	4.75798e-17	6.93745e-15	Gpd1	glycerol-3-phosphate dehydrogenase 1 [Source:RGD Symbol;Acc:621381]
ENSRNOG00000013262	-3.13193	11.5142	5.47803e-30	5.02062e-27	Myl1	myosin, light chain 1 [Source:RGD Symbol;Acc:1598796]
ENSRNOG00000013034	-3.12311	2.22481	1.1219e-09	6.69541e-08	Dupd1	dual specificity phosphatase and pro isomerase domain containing 1 [Source:RGD Symbol;Acc:1310229]
ENSRNOG00000006930	-3.0918	8.62614	3.05026e-34	6.52298e-31	Casq1	calsequestrin 1 [Source:RGD Symbol;Acc:1586677]
ENSRNOG00000021090	-3.09119	7.84438	1.364e-24	6.48203e-22	Pygm	glycogen phosphorylase, muscle associated [Source:RGD Symbol;Acc:3461]
ENSRNOG00000017716	-3.07746	3.60035	3.69889e-19	7.53341e-17	Ucp3	uncoupling protein 3 [Source:RGD Symbol;Acc:3933]
ENSRNOG00000015155	-3.06307	10.7156	1.70626e-28	1.28782e-25	Tnnc2	troponin C2, fast skeletal type [Source:RGD Symbol;Acc:1311973]
ENSRNOG00000019019	-3.05435	4.24295	2.55911e-22	8.87459e-20	Fitm1	fat storage-inducing transmembrane protein 1 [Source:RGD Symbol;Acc:1306911]
ENSRNOG00000019336	-3.05081	1.48263	3.72657e-05	0.000740289	Gata3	GATA binding protein 3 [Source:RGD Symbol;Acc:621250]
ENSRNOG00000011518	-3.04463	1.58265	4.26276e-08	2.04852e-06	Dusp26	dual specificity phosphatase 26 [Source:RGD Symbol;Acc:1310090]
ENSRNOG00000045733	-3.03906	4.77049	5.09233e-23	1.97999e-20	LOC298139	similar to RIKEN cDNA 2310003M01 [Source:RGD Symbol;Acc:1359584]
ENSRNOG00000006086	-3.01942	1.16643	1.96215e-07	8.1477e-06	Lynx1	Ly6/neurotoxin 1 [Source:RGD Symbol;Acc:1312017]
ENSRNOG00000019851	-3.00153	8.08297	1.63205e-21	5.36944e-19	Cox6a2	cytochrome c oxidase subunit 6A2 [Source:RGD Symbol;Acc:2385]
ENSRNOG00000011094	-2.98758	1.1878	2.03177e-08	1.01438e-06	Efcab6	EF-hand calcium binding domain 6 [Source:RGD Symbol;Acc:1309065]
ENSRNOG00000055411	-2.96726	1.93467	1.89629e-12	1.67802e-10	AC128836.1
ENSRNOG00000002593	-2.95868	1.72335	4.53361e-15	5.48781e-13	Esrrg	estrogen-related receptor gamma [Source:RGD Symbol;Acc:1303236]
ENSRNOG00000017619	-2.95311	4.04565	1.18734e-17	1.79232e-15	Aldh1a1	aldehyde dehydrogenase 1 family, member A1 [Source:RGD Symbol;Acc:2087]
ENSRNOG00000020922	-2.94253	7.20397	2.18576e-20	5.40758e-18	Hspb6	heat shock protein family B (small) member 6 [Source:RGD Symbol;Acc:621554]
ENSRNOG00000020719	-2.94125	7.85417	3.55096e-25	1.7524e-22	Hrc	histidine rich calcium binding protein [Source:RGD Symbol;Acc:727864]
ENSRNOG00000007495	-2.94001	6.37263	2.96587e-23	1.18922e-20	Smpx	small muscle protein, X-linked [Source:RGD Symbol;Acc:69233]
ENSRNOG00000002224	-2.93215	2.7911	8.11041e-17	1.16927e-14	Yipf7	Yip1 domain family, member 7 [Source:RGD Symbol;Acc:1310766]
ENSRNOG00000007461	-2.92135	7.65942	1.43846e-22	5.12692e-20	Klhl41	kelch-like family member 41 [Source:RGD Symbol;Acc:620852]
ENSRNOG00000004878	-2.91801	5.56681	2.26521e-23	9.67399e-21	Myf6	myogenic factor 6 [Source:RGD Symbol;Acc:3134]
ENSRNOG00000004197	-2.90901	3.34707	1.28965e-15	1.65475e-13	Asb12	ankyrin repeat and SOCS box-containing 12 [Source:RGD Symbol;Acc:1561142]
ENSRNOG00000029079	-2.90721	6.12364	1.6431e-14	1.86571e-12	Hspb7	heat shock protein family B (small) member 7 [Source:RGD Symbol;Acc:62021]
ENSRNOG00000007632	-2.89585	3.46408	2.78672e-07	1.11391e-05	Mss51	MSS51 mitochondrial translational activator [Source:RGD Symbol;Acc:1309408]
ENSRNOG00000007290	-2.88921	5.95147	4.27106e-24	1.88972e-21	Atp1a2	ATPase Na+/K+ transporting subunit alpha 2 [Source:RGD Symbol;Acc:2168]
ENSRNOG00000017369	-2.83875	8.17476	1.73867e-16	2.42488e-14	Mustn1	musculoskeletal, embryonic nuclear protein 1 [Source:RGD Symbol;Acc:727804]
ENSRNOG00000048402	-2.83757	0.811443	2.30089e-05	0.000503801	Igh-6	immunoglobulin heavy chain 6 [Source:RGD Symbol;Acc:1359202]
ENSRNOG00000019278	-2.81752	3.46987	4.15389e-19	8.32791e-17	Fsd2	fibronectin type III and SPRY domain containing 2 [Source:RGD Symbol;Acc:1305167]
ENSRNOG00000012658	-2.81627	7.4739	2.25854e-19	4.82988e-17	Pdlim3	PDZ and LIM domain 3 [Source:RGD Symbol;Acc:620427]
ENSRNOG00000046547	-2.80807	5.54942	9.7257e-22	3.28396e-19	Rbm24	RNA binding motif protein 24 [Source:RGD Symbol;Acc:1584029]
ENSRNOG00000011423	-2.80424	0.567406	1.5474e-06	4.95129e-05	Pitx1	paired-like homeodomain 1 [Source:RGD Symbol;Acc:69253]
ENSRNOG00000011912	-2.79233	7.5931	4.56767e-21	1.39542e-18	Tmem38a	transmembrane protein 38a [Source:RGD Symbol;Acc:1307901]
ENSRNOG00000030729	-2.78607	3.457	6.05837e-16	8.01391e-14	C4b	complement C4B (Chido blood group) [Source:RGD Symbol;Acc:1591983]
ENSRNOG00000026548	-2.78313	4.68061	1.01954e-11	8.49461e-10	Dhrs7c	dehydrogenase/reductase 7C [Source:RGD Symbol;Acc:1306989]
ENSRNOG00000038297	-2.78309	0.0389847	2.2031e-05	0.000486539	Plekhd1	pleckstrin homology and coiled-coil domain containing D1 [Source:RGD Symbol;Acc:1566112]
ENSRNOG00000036673	-2.77857	1.53233	1.01139e-12	9.40376e-11	Sectm1b	secreted and transmembrane 1B [Source:RGD Symbol;Acc:735132]
ENSRNOG00000000010	-2.77141	0.377916	8.87005e-07	3.10113e-05	Cbln1	cerebellin 1 precursor [Source:RGD Symbol;Acc:1562813]
ENSRNOG00000053272	-2.76411	3.38863	1.9677e-13	2.00377e-11	Chi3l1	chitinase 3 like 1 [Source:RGD Symbol;Acc:620874]
ENSRNOG00000008235	-2.76383	5.84348	6.29533e-08	2.91608e-06	Mylk2	myosin light chain kinase 2 [Source:RGD Symbol;Acc:620934]
ENSRNOG00000016827	-2.7532	1.20284	4.5468e-09	2.50386e-07	Slc38a3	solute carrier family 38, member 3 [Source:RGD Symbol;Acc:628620]
ENSRNOG00000010438	-2.73908	4.31278	9.42566e-20	2.08518e-17	Cpt1b	carnitine palmitoyltransferase 1B [Source:RGD Symbol;Acc:2397]
ENSRNOG00000017808	-2.71583	2.37838	1.004e-10	7.31947e-09	Klf15	Kruppel-like factor 15 [Source:RGD Symbol;Acc:70918]
ENSRNOG00000015117	-2.70414	3.76968	8.91576e-19	1.63426e-16	Lrrc39	leucine rich repeat containing 39 [Source:RGD Symbol;Acc:1585106]
ENSRNOG00000012609	-2.70245	8.59534	7.80283e-19	1.47233e-16	Trdn	triadin [Source:RGD Symbol;Acc:619856]
ENSRNOG00000010079	-2.70165	8.09133	6.45787e-18	1.02297e-15	Car3	carbonic anhydrase 3 [Source:RGD Symbol;Acc:2241]
ENSRNOG00000052389	-2.70139	0.677481	2.37581e-05	0.000515804	AABR07031489.1
ENSRNOG00000034228	-2.70077	0.241945	3.06856e-05	0.000636069	Pik3c2g	phosphatidylinositol-4-phosphate 3-kinase, catalytic subunit type 2 gamma [Source:RGD Symbol;Acc:620231]
ENSRNOG00000010047	-2.69608	5.36419	3.2787e-06	9.475e-05	Ddit4l	DNA-damage-inducible transcript 4-like [Source:RGD Symbol;Acc:2322961]
ENSRNOG00000006224	-2.69382	5.8167	4.50798e-26	2.41008e-23	Klhl31	kelch-like family member 31 [Source:RGD Symbol;Acc:1560540]
ENSRNOG00000034258	-2.68701	6.69887	3.766e-10	2.46539e-08	Xirp2	xin actin-binding repeat containing 2 [Source:RGD Symbol;Acc:1302980]
ENSRNOG00000008609	-2.68305	4.40939	2.72021e-21	8.51293e-19	Capn3	calpain 3 [Source:RGD Symbol;Acc:2269]
ENSRNOG00000010524	-2.66726	7.78928	7.35003e-20	1.65453e-17	Cryab	crystallin, alpha B [Source:RGD Symbol;Acc:2414]
ENSRNOG00000026745	-2.6625	3.6846	9.2999e-19	1.68066e-16	Acsl6	acyl-CoA synthetase long-chain family member 6 [Source:RGD Symbol;Acc:69403]
ENSRNOG00000018286	-2.6601	5.91124	1.14765e-09	6.81736e-08	Chrna1	cholinergic receptor nicotinic alpha 1 subunit [Source:RGD Symbol;Acc:69277]
ENSRNOG00000005975	-2.65014	5.11147	9.31353e-17	1.3278e-14	LOC100362027	ribosomal protein L30-like [Source:RGD Symbol;Acc:2318953]
ENSRNOG00000042419	-2.64859	5.0095	1.48698e-13	1.52635e-11	Acyp2	acylphosphatase 2 [Source:RGD Symbol;Acc:1595836]
ENSRNOG00000006146	-2.63191	4.97631	3.01296e-17	4.49527e-15	Trim54	tripartite motif-containing 54 [Source:RGD Symbol;Acc:1306453]
ENSRNOG00000020251	-2.62393	5.59604	2.34321e-19	4.84932e-17	Art1	ADP-ribosyltransferase 1 [Source:RGD Symbol;Acc:1304591]
ENSRNOG00000042477	-2.606	2.85029	3.78543e-05	0.000749551	Clrn1	clarin 1 [Source:RGD Symbol;Acc:628779]
ENSRNOG00000005133	-2.6059	2.64362	2.01334e-13	2.03411e-11	Mapt	microtubule-associated protein tau [Source:RGD Symbol;Acc:69329]
ENSRNOG00000019780	-2.59464	6.02319	6.49159e-21	1.7722e-18	Sypl2	synaptophysin-like 2 [Source:RGD Symbol;Acc:1309907]
ENSRNOG00000017786	-2.58364	11.1849	1.97567e-24	9.05351e-22	Acta1	actin, alpha 1, skeletal muscle [Source:RGD Symbol;Acc:2025]
ENSRNOG00000016983	-2.57681	4.57624	0.000161658	0.00243454	Myh7	myosin heavy chain 7 [Source:RGD Symbol;Acc:62030]
ENSRNOG00000013793	-2.57253	2.42376	6.54499e-10	4.03744e-08	C1qtnf9	C1q and tumor necrosis factor related protein 9 [Source:RGD Symbol;Acc:1560876]
ENSRNOG00000053862	-2.56172	1.99643	1.34369e-11	1.07756e-09	AABR07070635.1
ENSRNOG00000047781	-2.5595	0.634674	1.04308e-08	5.4185e-07	Slc25a23	solute carrier family 25 member 23 [Source:RGD Symbol;Acc:1588586]
ENSRNOG00000013586	-2.5172	1.0586	1.97513e-06	6.06238e-05	Snai3	snail family transcriptional repressor 3 [Source:RGD Symbol;Acc:1309658]
ENSRNOG00000031162	-2.49603	4.16837	4.88923e-14	5.22781e-12	Ccl24	C-C motif chemokine ligand 24 [Source:RGD Symbol;Acc:1310245]
ENSRNOG00000000875	-2.49174	9.36552	3.27003e-17	4.82272e-15	Fhl1	four and a half LIM domains 1 [Source:RGD Symbol;Acc:2615]
ENSRNOG00000038894	-2.49053	0.811623	3.38281e-06	9.75389e-05	Timd4	T-cell immunoglobulin and mucin domain containing 4 [Source:RGD Symbol;Acc:1564516]
ENSRNOG00000011425	-2.48583	2.54783	4.35327e-07	1.66737e-05	Ptpn3	protein tyrosine phosphatase, non-receptor type 3 [Source:RGD Symbol;Acc:1311363]
ENSRNOG00000028063	-2.48318	5.99682	2.95752e-16	4.08042e-14	Tmem38b	transmembrane protein 38B [Source:RGD Symbol;Acc:1305703]
ENSRNOG00000012477	-2.4708	6.4652	1.3766e-20	3.60472e-18	Eef1a2	eukaryotic translation elongation factor 1 alpha 2 [Source:RGD Symbol;Acc:3781]
ENSRNOG00000021014	-2.47073	1.6914	6.05545e-10	3.75818e-08	Sec1	secretory blood group 1 [Source:RGD Symbol;Acc:1562499]
ENSRNOG00000049388	-2.46822	2.90796	3.70446e-07	1.44224e-05	Prr32	proline rich 32 [Source:RGD Symbol;Acc:1583341]
ENSRNOG00000009047	-2.46398	6.01061	5.67455e-21	1.65478e-18	Sln	sarcolipin [Source:RGD Symbol;Acc:1305224]
ENSRNOG00000010389	-2.45932	7.89449	2.30709e-19	4.84932e-17	Ndrg2	NDRG family member 2 [Source:RGD Symbol;Acc:621874]
ENSRNOG00000024885	-2.45601	1.12007	3.13499e-07	1.24152e-05	Asb10	ankyrin repeat and SOCS box-containing 10 [Source:RGD Symbol;Acc:1562922]
ENSRNOG00000032951	-2.45229	4.96521	1.02677e-18	1.82978e-16	Jsrp1	junctional sarcoplasmic reticulum protein 1 [Source:RGD Symbol;Acc:1596084]
ENSRNOG00000007896	-2.44468	2.00351	2.78133e-05	0.000589872	Klhl38	kelch-like family member 38 [Source:RGD Symbol;Acc:1564169]
ENSRNOG00000055078	-2.44034	2.31976	2.08675e-08	1.03779e-06	Cyp4b1	cytochrome P450, family 4, subfamily b, polypeptide 1 [Source:RGD Symbol;Acc:2480]
ENSRNOG00000052634	-2.43425	1.83203	7.63357e-13	7.20194e-11	Lsmem2	leucine-rich single-pass membrane protein 2 [Source:RGD Symbol;Acc:1589957]
ENSRNOG00000031233	-2.42758	3.43677	5.96857e-12	5.13978e-10	Mapk12	mitogen-activated protein kinase 12 [Source:RGD Symbol;Acc:70975]
ENSRNOG00000031052	-2.42348	4.8489	1.01778e-14	1.1872e-12	LOC100362751	ribosomal protein P2-like [Source:RGD Symbol;Acc:2324107]
ENSRNOG00000019862	-2.40534	0.62056	4.90527e-06	0.000135354	Pinlyp	phospholipase A2 inhibitor and LY6/PLAUR domain containing [Source:RGD Symbol;Acc:1565787]
ENSRNOG00000016776	-2.40068	1.71299	4.69894e-10	2.98476e-08	Extl1	exostosin-like glycosyltransferase 1 [Source:RGD Symbol;Acc:1309572]
ENSRNOG00000009291	-2.39372	1.15602	1.02655e-06	3.48681e-05	Dnase1l3	deoxyribonuclease 1-like 3 [Source:RGD Symbol;Acc:620669]
ENSRNOG00000016714	-2.38671	6.03737	9.93338e-12	8.3304e-10	Nrap	nebulin-related anchoring protein [Source:RGD Symbol;Acc:1306731]
ENSRNOG00000051534	-2.36918	1.19685	1.00388e-07	4.457e-06	AC132720.1
ENSRNOG00000027694	-2.36606	4.9394	8.6446e-16	1.13183e-13	Rn60_5_1691.1
ENSRNOG00000020706	-2.36313	2.10759	1.69316e-10	1.17432e-08	Kcnn3	potassium calcium-activated channel subfamily N member 3 [Source:RGD Symbol;Acc:2964]
ENSRNOG00000015718	-2.35994	1.28612	8.37668e-05	0.00145441	RGD1307461	similar to RIKEN cDNA 6430571L13 gene; similar to g20 protein [Source:RGD Symbol;Acc:1307461]
ENSRNOG00000009197	-2.35823	1.01928	5.21014e-06	0.000141935	Asb4	ankyrin repeat and SOCS box-containing 4 [Source:RGD Symbol;Acc:1563114]
ENSRNOG00000018780	-2.35493	1.15186	0.000392972	0.00498736	Sh3rf2	SH3 domain containing ring finger 2 [Source:RGD Symbol;Acc:1308415]
ENSRNOG00000048701	-2.3513	0.197933	0.000177364	0.00261882	LOC690468	similar to 60S ribosomal protein L38 [Source:RGD Symbol;Acc:1596041]
ENSRNOG00000011705	-2.33955	4.07155	0.00013647	0.00212248	Stmn2	stathmin 2 [Source:RGD Symbol;Acc:68947]
ENSRNOG00000047023	-2.3374	1.3831	6.24244e-06	0.000165489	Aldh1l1	aldehyde dehydrogenase 1 family, member L1 [Source:RGD Symbol;Acc:621294]
ENSRNOG00000047218	-2.33665	4.42699	5.90246e-16	7.889e-14	Clic5	chloride intracellular channel 5 [Source:RGD Symbol;Acc:620659]
ENSRNOG00000057988	-2.3311	7.67719	9.18738e-15	1.0815e-12	Pfkm	phosphofructokinase, muscle [Source:RGD Symbol;Acc:68419]
ENSRNOG00000005615	-2.32464	6.45449	1.31206e-07	5.69917e-06	Gadd45a	growth arrest and DNA-damage-inducible, alpha [Source:RGD Symbol;Acc:2654]
ENSRNOG00000047102	-2.31118	3.85065	8.21547e-12	7.02751e-10	Popdc3	popeye domain containing 3 [Source:RGD Symbol;Acc:1590760]
ENSRNOG00000057852	-2.30543	3.11397	1.33553e-13	1.38195e-11	Cacng6	calcium voltage-gated channel auxiliary subunit gamma 6 [Source:RGD Symbol;Acc:628806]
ENSRNOG00000014698	-2.29687	4.58315	4.52561e-13	4.43268e-11	Chrnb1	cholinergic receptor nicotinic beta 1 subunit [Source:RGD Symbol;Acc:2349]
ENSRNOG00000062252	-2.2888	4.15596	2.28799e-09	1.30476e-07	Hmcn2	hemicentin 2 [Source:RGD Symbol;Acc:1585467]
ENSRNOG00000014327	-2.27753	7.4413	1.80974e-14	2.03691e-12	Csrp3	cysteine and glycine rich protein 3 [Source:RGD Symbol;Acc:71092]
ENSRNOG00000037645	-2.27743	7.2345	4.00223e-14	4.31535e-12	Tceal7	transcription elongation factor A like 7 [Source:RGD Symbol;Acc:1593009]
ENSRNOG00000046607	-2.26419	1.04599	1.38389e-05	0.000325214	Cited4	Cbp/p300-interacting transactivator, with Glu/Asp-rich carboxy-terminal domain, 4 [Source:RGD Symbol;Acc:620113]
ENSRNOG00000002827	-2.25688	5.13059	3.8705e-13	3.82019e-11	Rbfox1	RNA binding protein, fox-1 homolog 1 [Source:RGD Symbol;Acc:1311210]
ENSRNOG00000016603	-2.25391	5.78694	8.7471e-18	1.34751e-15	Rtn2	reticulon 2 [Source:RGD Symbol;Acc:1303245]
ENSRNOG00000011260	-2.24853	3.54315	1.1201e-05	0.000273233	Cmbl	carboxymethylenebutenolidase homolog [Source:RGD Symbol;Acc:1306952]
ENSRNOG00000058068	-2.24634	4.73785	7.40469e-14	7.85203e-12	Obscn	obscurin, cytoskeletal calmodulin and titin-interacting RhoGEF [Source:RGD Symbol;Acc:631335]
ENSRNOG00000003998	-2.24303	4.60099	3.528e-16	4.76503e-14	Sgca	sarcoglycan, alpha [Source:RGD Symbol;Acc:1308062]
ENSRNOG00000026344	-2.23305	1.24768	9.78833e-08	4.3761e-06	Fam179a	family with sequence similarity 179, member A [Source:RGD Symbol;Acc:1310677]
ENSRNOG00000026087	-2.2212	2.84594	6.82314e-10	4.18889e-08	Igfn1	immunoglobulin-like and fibronectin type III domain containing 1 [Source:RGD Symbol;Acc:1565384]
ENSRNOG00000021200	-2.21944	7.0807	2.98422e-13	2.99145e-11	Hfe2	hemochromatosis type 2 (juvenile) [Source:RGD Symbol;Acc:1310195]
ENSRNOG00000010992	-2.21673	4.09785	1.0742e-13	1.12057e-11	Hspb3	heat shock protein family B (small) member 3 [Source:RGD Symbol;Acc:68345]
ENSRNOG00000046155	-2.21593	0.713744	5.92191e-08	2.7833e-06	LOC498675	hypothetical LOC498675 [Source:RGD Symbol;Acc:1589651]
ENSRNOG00000019390	-2.21198	5.17387	2.30148e-15	2.86702e-13	Klhl40	kelch-like family member 40 [Source:RGD Symbol;Acc:1305368]
ENSRNOG00000000634	-2.20454	1.55504	4.67979e-10	2.98476e-08	RGD1306739	similar to RIKEN cDNA 1700040L02 [Source:RGD Symbol;Acc:1306739]
ENSRNOG00000000405	-2.18735	3.09201	1.27593e-09	7.47555e-08	Vgll2	vestigial-like family member 2 [Source:RGD Symbol;Acc:1311903]
ENSRNOG00000060021	-2.1826	5.04865	7.1388e-09	3.78504e-07	Txlnb	taxilin beta [Source:RGD Symbol;Acc:1307979]
ENSRNOG00000029571	-2.17632	5.10718	2.15745e-12	1.89605e-10	Coq10a	coenzyme Q10A [Source:RGD Symbol;Acc:1562447]
ENSRNOG00000030688	-2.16648	2.49257	3.73781e-09	2.07618e-07	Lrrc2	leucine rich repeat containing 2 [Source:RGD Symbol;Acc:1311716]
ENSRNOG00000018797	-2.16522	0.89021	1.22544e-09	7.21265e-08	Myrip	myosin VIIA and Rab interacting protein [Source:RGD Symbol;Acc:727731]
ENSRNOG00000013781	-2.15726	4.36577	3.74219e-13	3.72217e-11	Kcnq5	potassium voltage-gated channel subfamily Q member 5 [Source:RGD Symbol;Acc:628848]
ENSRNOG00000003533	-2.15641	2.68658	1.02814e-05	0.000254183	Clcn4	chloride voltage-gated channel 4 [Source:RGD Symbol;Acc:708381]
ENSRNOG00000003336	-2.15298	7.95404	1.93915e-11	1.50795e-09	Mybph	myosin binding protein H [Source:RGD Symbol;Acc:620287]
ENSRNOG00000003510	-2.14765	1.14488	3.21681e-05	0.000659343	Fmo2	flavin containing monooxygenase 2 [Source:RGD Symbol;Acc:628600]
ENSRNOG00000020242	-2.14663	3.36879	8.61083e-08	3.90409e-06	Art5	ADP-ribosyltransferase 5 [Source:RGD Symbol;Acc:628834]
ENSRNOG00000026493	-2.14228	1.70818	2.0795e-06	6.32277e-05	Cdnf	cerebral dopamine neurotrophic factor [Source:RGD Symbol;Acc:1307600]
ENSRNOG00000033915	-2.13979	3.52527	7.98587e-07	2.82277e-05	Gpt	glutamic--pyruvic transaminase [Source:RGD Symbol;Acc:621720]
ENSRNOG00000005053	-2.1323	4.26462	2.05978e-09	1.18516e-07	Egln3	egl-9 family hypoxia-inducible factor 3 [Source:RGD Symbol;Acc:71019]
ENSRNOG00000021174	-2.12877	4.87166	2.31832e-12	2.02356e-10	Macrod1	MACRO domain containing 1 [Source:RGD Symbol;Acc:628701]
ENSRNOG00000014496	-2.12654	4.51798	1.0713e-11	8.86829e-10	Coro6	coronin 6 [Source:RGD Symbol;Acc:708560]
ENSRNOG00000005850	-2.11595	0.132913	1.54261e-05	0.000358572	Gdap1	ganglioside-induced differentiation-associated-protein 1 [Source:RGD Symbol;Acc:1309005]
ENSRNOG00000036661	-2.1116	3.08772	1.39467e-07	5.98495e-06	Rab40b	Rab40b, member RAS oncogene family [Source:RGD Symbol;Acc:1305663]
ENSRNOG00000012879	-2.10844	5.6765	2.02272e-14	2.25682e-12	Fabp3	fatty acid binding protein 3 [Source:RGD Symbol;Acc:69048]
ENSRNOG00000018415	-2.10305	4.42696	1.80456e-12	1.61918e-10	Acot13	acyl-CoA thioesterase 13 [Source:RGD Symbol;Acc:1306513]
ENSRNOG00000003063	-2.09668	5.01169	1.24376e-14	1.43772e-12	Phka1	phosphorylase kinase, alpha 1 [Source:RGD Symbol;Acc:621522]
ENSRNOG00000019527	-2.08177	5.70267	7.62381e-08	3.48118e-06	Chrnd	cholinergic receptor nicotinic delta subunit [Source:RGD Symbol;Acc:2352]
ENSRNOG00000002256	-2.07923	5.20448	1.39112e-09	8.1134e-08	Art3	ADP-ribosyltransferase 3 [Source:RGD Symbol;Acc:628833]
ENSRNOG00000027434	-2.07612	4.65076	2.87679e-12	2.49406e-10	Fitm2	fat storage-inducing transmembrane protein 2 [Source:RGD Symbol;Acc:1307696]
ENSRNOG00000000383	-2.07234	5.0821	3.09128e-15	3.81386e-13	Mypn	myopalladin [Source:RGD Symbol;Acc:1308510]
ENSRNOG00000006776	-2.06805	2.13093	1.10619e-07	4.89433e-06	Smyd1	SET and MYND domain containing 1 [Source:RGD Symbol;Acc:1305105]
ENSRNOG00000036672	-2.06746	0.785435	0.000308169	0.00411458	Sectm1a	secreted and transmembrane 1A [Source:RGD Symbol;Acc:1305973]
ENSRNOG00000030963	-2.06603	4.19868	6.25168e-09	3.32843e-07	LOC108351137	glyceraldehyde-3-phosphate dehydrogenase [Source:RGD Symbol;Acc:11369796]
ENSRNOG00000054495	-2.06449	0.284117	2.02184e-07	8.36848e-06	Cldn2	claudin 2 [Source:RGD Symbol;Acc:1560247]
ENSRNOG00000037085	-2.06176	4.31291	5.92231e-07	2.17112e-05	Xirp1	xin actin-binding repeat containing 1 [Source:RGD Symbol;Acc:1304776]
ENSRNOG00000018694	-2.057	1.32437	5.45345e-06	0.000146694	Lipg	lipase G, endothelial type [Source:RGD Symbol;Acc:1310740]
ENSRNOG00000009466	-2.02797	4.30325	3.28247e-11	2.49215e-09	Unc45b	unc-45 myosin chaperone B [Source:RGD Symbol;Acc:1305666]
ENSRNOG00000038091	-2.0211	1.86541	3.95397e-07	1.52352e-05	Sohlh2	spermatogenesis and oogenesis specific basic helix-loop-helix 2 [Source:RGD Symbol;Acc:1589577]
ENSRNOG00000002218	-2.00727	4.29535	3.13391e-10	2.09434e-08	Stbd1	starch binding domain 1 [Source:RGD Symbol;Acc:1311800]
ENSRNOG00000015055	-2.00284	-0.119552	8.41145e-09	4.4052e-07	Scg2	secretogranin II [Source:RGD Symbol;Acc:3626]
ENSRNOG00000037446	-1.98907	2.95646	1.11475e-06	3.75417e-05	Pxmp2	peroxisomal membrane protein 2 [Source:RGD Symbol;Acc:61812]
ENSRNOG00000050000	-1.98695	2.12828	8.61518e-09	4.49355e-07	LOC100361706	lambda-chain C1-region-like [Source:RGD Symbol;Acc:2319568]
ENSRNOG00000006019	-1.98544	0.418405	0.000574686	0.00668521	G0s2	G0/G1switch 2 [Source:RGD Symbol;Acc:1311675]
ENSRNOG00000048275	-1.98496	1.47176	2.49863e-05	0.000537017	RGD1309350	similar to transthyretin (4L369) [Source:RGD Symbol;Acc:1309350]
ENSRNOG00000022748	-1.98372	4.98255	8.6316e-14	9.07803e-12	Tmem126a	transmembrane protein 126A [Source:RGD Symbol;Acc:1305677]
ENSRNOG00000009919	-1.98322	0.16832	0.000656347	0.00738088	Acod1	aconitate decarboxylase 1 [Source:RGD Symbol;Acc:1563454]
ENSRNOG00000000413	-1.96688	1.30962	0.000113177	0.00183123	Pln	phospholamban [Source:RGD Symbol;Acc:619894]
ENSRNOG00000042524	-1.96221	2.16095	0.000234944	0.00330544	Milr1	mast cell immunoglobulin-like receptor 1 [Source:RGD Symbol;Acc:620488]
ENSRNOG00000011006	-1.95994	0.655229	8.01932e-05	0.00140462	Stoml3	stomatin like 3 [Source:RGD Symbol;Acc:1311090]
ENSRNOG00000000658	-1.9583	3.73092	5.65447e-09	3.02302e-07	Acacb	acetyl-CoA carboxylase beta [Source:RGD Symbol;Acc:620500]
ENSRNOG00000013552	-1.95733	5.70598	4.27167e-11	3.20525e-09	Scd	stearoyl-CoA desaturase [Source:RGD Symbol;Acc:621176]
ENSRNOG00000003245	-1.95115	5.55239	1.09348e-11	8.99388e-10	Cacng1	calcium voltage-gated channel auxiliary subunit gamma 1 [Source:RGD Symbol;Acc:2249]
ENSRNOG00000019584	-1.94437	6.18451	2.44274e-08	1.20087e-06	Dlk1	delta like non-canonical Notch ligand 1 [Source:RGD Symbol;Acc:619931]
ENSRNOG00000017311	-1.93934	1.97145	0.000519062	0.00621857	Me3	malic enzyme 3 [Source:RGD Symbol;Acc:1311070]
ENSRNOG00000036681	-1.93385	1.21934	3.4685e-06	9.97854e-05	Myadml2	myeloid-associated differentiation marker-like 2 [Source:RGD Symbol;Acc:1311499]
ENSRNOG00000017833	-1.92909	7.2205	1.83332e-12	1.63356e-10	Actn2	actinin alpha 2 [Source:RGD Symbol;Acc:1308097]
ENSRNOG00000010068	-1.92429	4.84761	8.74577e-12	7.38269e-10	Plpp7	phospholipid phosphatase 7 [Source:RGD Symbol;Acc:1305821]
ENSRNOG00000061441	-1.92404	1.82796	7.66786e-05	0.00135893	AABR07071935.1
ENSRNOG00000003596	-1.91605	5.87013	8.33574e-07	2.93835e-05	Itgb1bp2	integrin subunit beta 1 binding protein 2 [Source:RGD Symbol;Acc:1565015]
ENSRNOG00000031032	-1.91427	5.34504	3.86689e-10	2.51858e-08	Hmgn3	high mobility group nucleosomal binding domain 3 [Source:RGD Symbol;Acc:1359106]
ENSRNOG00000002429	-1.91365	1.00619	0.000159788	0.00240921	Zcchc5	zinc finger CCHC-type containing 5 [Source:RGD Symbol;Acc:1564805]
ENSRNOG00000016151	-1.91086	5.28457	1.10606e-05	0.000270838	Ankrd23	ankyrin repeat domain 23 [Source:RGD Symbol;Acc:1310398]
ENSRNOG00000007882	-1.90859	2.78514	3.09413e-07	1.22913e-05	Ablim2	actin binding LIM protein family, member 2 [Source:RGD Symbol;Acc:1303094]
ENSRNOG00000001924	-1.90677	1.79209	2.29857e-07	9.42268e-06	Tp63	tumor protein p63 [Source:RGD Symbol;Acc:620863]
ENSRNOG00000003722	-1.90212	4.85067	1.52086e-11	1.19718e-09	Dusp27	dual specificity phosphatase 27 (putative) [Source:RGD Symbol;Acc:1560598]
ENSRNOG00000011112	-1.89736	0.983656	0.000571121	0.00665611	Fam161b	family with sequence similarity 161, member B [Source:RGD Symbol;Acc:1309058]
ENSRNOG00000025883	-1.89402	3.07578	4.62966e-09	2.53859e-07	Ip6k3	inositol hexakisphosphate kinase 3 [Source:RGD Symbol;Acc:1584104]
ENSRNOG00000006783	-1.8926	7.02573	2.01857e-11	1.55932e-09	Neb	nebulin [Source:RGD Symbol;Acc:1311134]
ENSRNOG00000020093	-1.89208	3.68015	2.43168e-10	1.65084e-08	LOC100360573	ribosomal protein S12-like [Source:RGD Symbol;Acc:2321884]
ENSRNOG00000022637	-1.89186	1.26798	2.6401e-06	7.85003e-05	AABR07052585.1
ENSRNOG00000034237	-1.88805	2.60645	9.4671e-10	5.70293e-08	LOC103693375	60S ribosomal protein L39 [Source:RGD Symbol;Acc:9312086]
ENSRNOG00000042971	-1.88655	0.179754	2.19607e-06	6.59902e-05	LOC363337	similar to RIKEN cDNA 1700081O22 [Source:RGD Symbol;Acc:1359598]
ENSRNOG00000039110	-1.88637	3.58049	2.09761e-10	1.43928e-08	Lsmem1	leucine-rich single-pass membrane protein 1 [Source:RGD Symbol;Acc:1587073]
ENSRNOG00000010681	-1.88402	3.2902	1.04049e-09	6.23855e-08	Pitx2	paired-like homeodomain 2 [Source:RGD Symbol;Acc:3331]
ENSRNOG00000018598	-1.88239	7.36906	1.3872e-06	4.51755e-05	Ankrd1	ankyrin repeat domain 1 [Source:RGD Symbol;Acc:61989]
ENSRNOG00000011306	-1.8814	4.01977	1.477e-08	7.52038e-07	Myod1	myogenic differentiation 1 [Source:RGD Symbol;Acc:631429]
ENSRNOG00000011146	-1.87824	7.29515	4.87163e-13	4.73544e-11	Gyg1	glycogenin 1 [Source:RGD Symbol;Acc:621785]
ENSRNOG00000043199	-1.8761	3.48235	1.37298e-11	1.0942e-09	Bves	blood vessel epicardial substance [Source:RGD Symbol;Acc:1561100]
ENSRNOG00000016301	-1.86991	2.94783	1.16322e-09	6.87803e-08	Dmrt2	doublesex and mab-3 related transcription factor 2 [Source:RGD Symbol;Acc:1309047]
ENSRNOG00000057701	-1.86846	4.7134	3.95116e-10	2.56047e-08	Myom1	myomesin 1 [Source:RGD Symbol;Acc:631436]
ENSRNOG00000005370	-1.85992	0.506799	0.000384377	0.00490325	S1pr4	sphingosine-1-phosphate receptor 4 [Source:RGD Symbol;Acc:1304801]
ENSRNOG00000009761	-1.85907	6.59573	7.44626e-10	4.5281e-08	Tmod1	tropomodulin 1 [Source:RGD Symbol;Acc:3874]
ENSRNOG00000022392	-1.8558	7.54223	1.18941e-10	8.52587e-09	Hspb8	heat shock protein family B (small) member 8 [Source:RGD Symbol;Acc:71003]
ENSRNOG00000018143	-1.85396	1.01256	0.000466034	0.00570036	Hpdl	4-hydroxyphenylpyruvate dioxygenase-like [Source:RGD Symbol;Acc:1310014]
ENSRNOG00000019810	-1.85326	9.87632	3.27967e-14	3.56622e-12	Des	desmin [Source:RGD Symbol;Acc:620686]
ENSRNOG00000054548	-1.84687	3.98121	4.96573e-11	3.70438e-09	Srpk3	SRSF protein kinase 3 [Source:RGD Symbol;Acc:727856]
ENSRNOG00000049942	-1.84564	3.04526	5.21004e-08	2.46679e-06	RGD1564899	similar to chromosome 10 open reading frame 71 [Source:RGD Symbol;Acc:1564899]
ENSRNOG00000032857	-1.83981	6.98877	1.36157e-07	5.88225e-06	Klk1	kallikrein 1 [Source:RGD Symbol;Acc:2969]
ENSRNOG00000027557	-1.83892	1.65775	3.09385e-06	9.08403e-05	Klf14	Kruppel-like factor 14 [Source:RGD Symbol;Acc:1306012]
ENSRNOG00000042497	-1.83075	2.36501	7.37973e-08	3.38176e-06	LOC108352018	uncharacterized LOC108352018 [Source:RGD Symbol;Acc:11426996]
ENSRNOG00000007607	-1.82857	4.7092	2.01994e-05	0.00045232	Nr4a1	nuclear receptor subfamily 4, group A, member 1 [Source:RGD Symbol;Acc:620029]
ENSRNOG00000042630	-1.82547	4.56067	2.33941e-07	9.55954e-06	Asb5	ankyrin repeat and SOCS box-containing 5 [Source:RGD Symbol;Acc:1565973]
ENSRNOG00000007637	-1.82289	2.2039	3.66164e-09	2.04272e-07	Acer2	alkaline ceramidase 2 [Source:RGD Symbol;Acc:1304629]
ENSRNOG00000023683	-1.81571	1.48043	0.000253147	0.0035077	Nog	noggin [Source:RGD Symbol;Acc:3183]
ENSRNOG00000012134	-1.80071	1.84193	0.000367345	0.00473708	Scn4a	sodium voltage-gated channel alpha subunit 4 [Source:RGD Symbol;Acc:3636]
ENSRNOG00000001827	-1.79799	3.39075	3.96694e-07	1.52395e-05	Masp1	mannan-binding lectin serine peptidase 1 [Source:RGD Symbol;Acc:620213]
ENSRNOG00000028041	-1.79206	7.33035	1.32341e-05	0.000313875	Tnnt1	troponin T1, slow skeletal type [Source:RGD Symbol;Acc:621852]
ENSRNOG00000011557	-1.78002	6.6706	5.51818e-05	0.00103062	S100a8	S100 calcium binding protein A8 [Source:RGD Symbol;Acc:620265]
ENSRNOG00000043350	-1.77751	3.88393	1.72689e-05	0.000397626	Cap2	CAP, adenylate cyclase-associated protein, 2 (yeast) [Source:RGD Symbol;Acc:620310]
ENSRNOG00000046699	-1.77437	4.68508	0.000439114	0.00544375	Slpi	secretory leukocyte peptidase inhibitor [Source:RGD Symbol;Acc:621768]
ENSRNOG00000016033	-1.77018	3.55585	4.674e-09	2.552e-07	Endog	endonuclease G [Source:RGD Symbol;Acc:1310763]
ENSRNOG00000011984	-1.75675	5.08107	5.29392e-08	2.49729e-06	Cxcl14	C-X-C motif chemokine ligand 14 [Source:RGD Symbol;Acc:1307406]
ENSRNOG00000028108	-1.75469	1.32336	9.83156e-05	0.0016447	Cytl1	cytokine like 1 [Source:RGD Symbol;Acc:1561846]
ENSRNOG00000010253	-1.75025	4.30459	2.12482e-08	1.05265e-06	Cd163	CD163 molecule [Source:RGD Symbol;Acc:1310382]
ENSRNOG00000018220	-1.74514	7.02436	1.32317e-11	1.06777e-09	Pde4dip	phosphodiesterase 4D interacting protein [Source:RGD Symbol;Acc:708410]
ENSRNOG00000027742	-1.74023	2.45426	4.1766e-10	2.6795e-08	Adamtsl2	ADAMTS-like 2 [Source:RGD Symbol;Acc:1305459]
ENSRNOG00000057470	-1.73789	4.0935	5.94385e-08	2.78341e-06	Pla2g12a	phospholipase A2, group XIIA [Source:RGD Symbol;Acc:1304662]
ENSRNOG00000033581	-1.73771	6.57077	5.97073e-08	2.78583e-06	Tnxb	tenascin XB [Source:RGD Symbol;Acc:1594402]
ENSRNOG00000018044	-1.73445	7.89807	1.72129e-10	1.18741e-08	Phyh	phytanoyl-CoA 2-hydroxylase [Source:RGD Symbol;Acc:620317]
ENSRNOG00000007069	-1.72641	1.53854	0.000266035	0.003643	Adhfe1	alcohol dehydrogenase, iron containing, 1 [Source:RGD Symbol;Acc:1308863]
ENSRNOG00000022957	-1.71825	5.29549	0.00011586	0.00186058	Ctxn3	cortexin 3 [Source:RGD Symbol;Acc:2300148]
ENSRNOG00000056672	-1.71301	0.357932	0.000396715	0.00501997	AABR07027390.2
ENSRNOG00000015089	-1.69829	1.98033	8.58981e-05	0.00147941	Mcoln2	mucolipin 2 [Source:RGD Symbol;Acc:1308884]
ENSRNOG00000004537	-1.69569	2.93534	3.50736e-10	2.31974e-08	Rxrg	retinoid X receptor gamma [Source:RGD Symbol;Acc:620046]
ENSRNOG00000014815	-1.6814	5.58996	1.19034e-07	5.23059e-06	Myoz2	myozenin 2 [Source:RGD Symbol;Acc:1307669]
ENSRNOG00000001711	-1.68053	3.8592	3.78172e-07	1.46154e-05	Hrasls	HRAS-like suppressor [Source:RGD Symbol;Acc:1309485]
ENSRNOG00000051619	-1.67954	1.32354	3.89881e-05	0.000768444	Asb2	ankyrin repeat and SOCS box-containing 2 [Source:RGD Symbol;Acc:1306414]
ENSRNOG00000003784	-1.67092	2.1497	2.68481e-07	1.0799e-05	Rilp	Rab interacting lysosomal protein [Source:RGD Symbol;Acc:1307691]
ENSRNOG00000006620	-1.66832	1.08061	0.00054897	0.00647411	Xcr1	X-C motif chemokine receptor 1 [Source:RGD Symbol;Acc:1311480]
ENSRNOG00000022099	-1.66488	5.88788	9.26697e-06	0.00023108	Trim72	tripartite motif containing 72 [Source:RGD Symbol;Acc:1562778]
ENSRNOG00000019342	-1.66203	3.48221	4.59557e-06	0.000127908	Sult1a1	sulfotransferase family 1A member 1 [Source:RGD Symbol;Acc:3767]
ENSRNOG00000010473	-1.66063	3.96987	7.39244e-07	2.65693e-05	Cand2	cullin-associated and neddylation-dissociated 2 (putative) [Source:RGD Symbol;Acc:620480]
ENSRNOG00000005798	-1.66033	5.65433	1.02721e-06	3.48681e-05	Cav3	caveolin 3 [Source:RGD Symbol;Acc:2281]
ENSRNOG00000048430	-1.65923	4.13454	3.61409e-10	2.37807e-08	Myo18b	myosin XVIIIb [Source:RGD Symbol;Acc:1594542]
ENSRNOG00000028707	-1.65836	3.79223	0.000504207	0.00607463	Defa7	defensin alpha 7 [Source:RGD Symbol;Acc:1560529]
ENSRNOG00000018494	-1.65706	3.9048	1.01958e-06	3.48681e-05	Ppp1r3c	protein phosphatase 1, regulatory subunit 3C [Source:RGD Symbol;Acc:1309132]
ENSRNOG00000030475	-1.65563	1.94068	1.34642e-05	0.000317572	Mum1l1	MUM1 like 1 [Source:RGD Symbol;Acc:1565148]
ENSRNOG00000047123	-1.65511	-0.33953	8.98194e-05	0.00152848	Tstd1	thiosulfate sulfurtransferase like domain containing 1 [Source:RGD Symbol;Acc:2323815]
ENSRNOG00000005269	-1.64635	6.0473	4.77593e-06	0.000132069	Srl	sarcalumenin [Source:RGD Symbol;Acc:1306564]
ENSRNOG00000053562	-1.63987	1.78269	2.29396e-05	0.000503141	Arx	aristaless related homeobox [Source:RGD Symbol;Acc:1562672]
ENSRNOG00000061868	-1.6356	0.486453	0.000316083	0.00420276	Kbtbd12	kelch repeat and BTB domain containing 12 [Source:RGD Symbol;Acc:1585999]
ENSRNOG00000013615	-1.63438	0.548528	3.4025e-05	0.000690479	Dntt	DNA nucleotidylexotransferase [Source:RGD Symbol;Acc:1305054]
ENSRNOG00000033844	-1.63011	3.76693	3.7253e-06	0.000106221	LOC100912195	protein BEX1-like [Source:RGD Symbol;Acc:6488322]
ENSRNOG00000002860	-1.62085	3.06503	1.15688e-05	0.000279581	Ccdc181	coiled-coil domain containing 181 [Source:RGD Symbol;Acc:1309708]
ENSRNOG00000048213	-1.62059	1.61034	6.03428e-08	2.80528e-06	Rn50_X_0744.1
ENSRNOG00000010725	-1.62004	5.12462	1.48388e-08	7.52558e-07	Cpa1	carboxypeptidase A1 [Source:RGD Symbol;Acc:2388]
ENSRNOG00000021102	-1.61855	5.36648	7.45861e-07	2.67323e-05	Scn1b	sodium voltage-gated channel beta subunit 1 [Source:RGD Symbol;Acc:3631]
ENSRNOG00000018839	-1.6167	2.89607	3.1681e-05	0.00065088	Ntrk2	neurotrophic receptor tyrosine kinase 2 [Source:RGD Symbol;Acc:3213]
ENSRNOG00000007883	-1.61345	4.60192	4.76702e-07	1.815e-05	Timm10	translocase of inner mitochondrial membrane 10 [Source:RGD Symbol;Acc:621741]
ENSRNOG00000032274	-1.61271	2.26066	2.64565e-07	1.0675e-05	AY172581.15
ENSRNOG00000042753	-1.60602	3.3702	1.44009e-07	6.1185e-06	Fgf13	fibroblast growth factor 13 [Source:RGD Symbol;Acc:620164]
ENSRNOG00000032803	-1.60438	4.03204	9.43113e-08	4.23115e-06	Rpl21	ribosomal protein L21 [Source:RGD Symbol;Acc:68390]
ENSRNOG00000008346	-1.6043	2.96991	3.93532e-05	0.000773263	Itgb6	integrin subunit beta 6 [Source:RGD Symbol;Acc:1303119]
ENSRNOG00000018129	-1.60281	6.36041	1.21002e-07	5.29892e-06	Ndufab1	NADH:ubiquinone oxidoreductase subunit AB1 [Source:RGD Symbol;Acc:1305619]
ENSRNOG00000018953	-1.60234	2.26017	3.82238e-05	0.000755701	Cblc	Cbl proto-oncogene C [Source:RGD Symbol;Acc:1307651]
ENSRNOG00000030639	-1.59833	5.28091	2.13838e-07	8.79408e-06	Usp13	ubiquitin specific peptidase 13 [Source:RGD Symbol;Acc:1306044]
ENSRNOG00000003745	-1.59802	5.70489	7.47213e-05	0.00133062	Atf3	activating transcription factor 3 [Source:RGD Symbol;Acc:2165]
ENSRNOG00000003597	-1.59775	6.51337	5.99567e-07	2.18552e-05	Tuba4a	tubulin, alpha 4A [Source:RGD Symbol;Acc:1359623]
ENSRNOG00000054493	-1.59229	6.80329	3.46964e-05	0.000699984	Rmrp	RNA component of mitochondrial RNA processing endoribonuclease [Source:RGD Symbol;Acc:3580]
ENSRNOG00000008919	-1.58926	4.46828	1.06962e-08	5.53398e-07	Arpp21	cAMP regulated phosphoprotein 21 [Source:RGD Symbol;Acc:1593239]
ENSRNOG00000052080	-1.58537	4.74943	1.73442e-07	7.27267e-06	Camk2b	calcium/calmodulin-dependent protein kinase II beta [Source:RGD Symbol;Acc:2262]
ENSRNOG00000050841	-1.58121	2.3158	0.000910379	0.00932249	Ache	acetylcholinesterase [Source:RGD Symbol;Acc:69313]
ENSRNOG00000036960	-1.56716	4.70008	9.48218e-07	3.28827e-05	Abcc9	ATP binding cassette subfamily C member 9 [Source:RGD Symbol;Acc:3787]
ENSRNOG00000000611	-1.56685	6.35633	2.67598e-09	1.51258e-07	Ube2d1	ubiquitin-conjugating enzyme E2D 1 [Source:RGD Symbol;Acc:1307886]
ENSRNOG00000004712	-1.56571	5.12871	1.98771e-05	0.000446661	Angptl1	angiopoietin-like 1 [Source:RGD Symbol;Acc:1598128]
ENSRNOG00000023068	-1.56397	3.34945	1.31923e-05	0.000313464	Cd5l	Cd5 molecule-like [Source:RGD Symbol;Acc:1308526]
ENSRNOG00000004932	-1.5596	3.22423	7.74561e-06	0.000198768	Sel1l3	SEL1L family member 3 [Source:RGD Symbol;Acc:1562860]
ENSRNOG00000030237	-1.55281	8.36278	2.97863e-07	1.18692e-05	Cox7c	cytochrome c oxidase subunit 7C [Source:RGD Symbol;Acc:2300145]
ENSRNOG00000056189	-1.5459	0.81546	0.000585234	0.0067589	Rn50_20_0055.15
ENSRNOG00000013484	-1.54343	4.06812	5.49381e-06	0.000147471	Gsta1	glutathione S-transferase alpha 1 [Source:RGD Symbol;Acc:2753]
ENSRNOG00000003256	-1.54273	8.7296	1.40252e-10	9.94241e-09	Ccng1	cyclin G1 [Source:RGD Symbol;Acc:2295]
ENSRNOG00000034246	-1.53458	4.94014	5.60641e-07	2.07308e-05	Rps27a	ribosomal protein S27a [Source:RGD Symbol;Acc:6489478]
ENSRNOG00000007331	-1.52997	2.44351	3.72004e-05	0.000740289	Rragd	Ras-related GTP binding D [Source:RGD Symbol;Acc:1310007]
ENSRNOG00000034134	-1.52888	4.15817	0.000107312	0.00176529	Cpm	carboxypeptidase M [Source:RGD Symbol;Acc:1310532]
ENSRNOG00000011809	-1.52626	0.206004	2.2837e-05	0.000502609	Rpgrip1	retinitis pigmentosa GTPase regulator interacting protein 1 [Source:RGD Symbol;Acc:1310807]
ENSRNOG00000004518	-1.52101	5.41998	7.33669e-08	3.37409e-06	Cacnb1	calcium voltage-gated channel auxiliary subunit beta 1 [Source:RGD Symbol;Acc:68382]
ENSRNOG00000023227	-1.5158	4.63957	8.74457e-06	0.000220869	AABR07052585.2
ENSRNOG00000006670	-1.51141	3.74586	4.71757e-05	0.000899423	Rai2	retinoic acid induced 2 [Source:RGD Symbol;Acc:1560139]
ENSRNOG00000011483	-1.50534	7.03235	0.000516969	0.00619928	S100a9	S100 calcium binding protein A9 [Source:RGD Symbol;Acc:620267]
ENSRNOG00000020557	-1.50197	5.75372	2.01206e-08	1.00847e-06	Ryr1	ryanodine receptor 1 [Source:RGD Symbol;Acc:1586637]
ENSRNOG00000004147	-1.50153	5.57965	0.000441793	0.0054664	Abca8a	ATP-binding cassette, subfamily A (ABC1), member 8a [Source:RGD Symbol;Acc:1307333]
ENSRNOG00000004441	-1.50061	2.54511	7.10835e-05	0.00127563	Fcmr	Fc fragment of IgM receptor [Source:RGD Symbol;Acc:1359282]
ENSRNOG00000049766	-1.49114	2.66274	0.000582465	0.00674885	Sctr	secretin receptor [Source:RGD Symbol;Acc:621342]
ENSRNOG00000005046	-1.48492	5.26845	1.98508e-05	0.000446661	Tspan13	tetraspanin 13 [Source:RGD Symbol;Acc:1311788]
ENSRNOG00000048114	-1.4832	2.11454	6.02141e-05	0.00111322	Echdc3	enoyl CoA hydratase domain containing 3 [Source:RGD Symbol;Acc:1589147]
ENSRNOG00000020779	-1.48251	1.11099	0.000113996	0.00184217	Kcna7	potassium voltage-gated channel subfamily A member 7 [Source:RGD Symbol;Acc:1309632]
ENSRNOG00000015354	-1.48227	2.49909	5.24012e-06	0.000142148	Aox1	aldehyde oxidase 1 [Source:RGD Symbol;Acc:620528]
ENSRNOG00000002947	-1.48088	9.47627	7.60767e-07	2.71222e-05	Dpt	dermatopontin [Source:RGD Symbol;Acc:1307176]
ENSRNOG00000014204	-1.48084	6.12626	4.40924e-08	2.11101e-06	Pacsin3	protein kinase C and casein kinase substrate in neurons 3 [Source:RGD Symbol;Acc:1307327]
ENSRNOG00000046231	-1.47981	4.39214	5.82235e-06	0.000155315	Cacna1s	calcium voltage-gated channel subunit alpha1 S [Source:RGD Symbol;Acc:70983]
ENSRNOG00000004404	-1.47974	2.53252	4.79032e-05	0.000910586	Tac4	tachykinin 4 (hemokinin) [Source:RGD Symbol;Acc:628842]
ENSRNOG00000028939	-1.47894	5.0393	8.99138e-07	3.13501e-05	LOC108352650	40S ribosomal protein S29 [Source:RGD Symbol;Acc:11376557]
ENSRNOG00000022242	-1.47413	4.79476	1.29159e-05	0.000308037	Cxcl9	C-X-C motif chemokine ligand 9 [Source:RGD Symbol;Acc:628798]
ENSRNOG00000012723	-1.47406	4.91487	2.4895e-07	1.01405e-05	Trim55	tripartite motif-containing 55 [Source:RGD Symbol;Acc:1306943]
ENSRNOG00000042869	-1.47002	4.5735	6.49837e-06	0.000170862	Usmg5	up-regulated during skeletal muscle growth 5 homolog (mouse) [Source:RGD Symbol;Acc:631426]
ENSRNOG00000016731	-1.46666	10.3081	3.71196e-07	1.44224e-05	Tpm2	tropomyosin 2, beta [Source:RGD Symbol;Acc:1559479]
ENSRNOG00000047966	-1.46588	1.50536	0.000582201	0.00674885	Hspa1l	heat shock protein family A (Hsp70) member 1 like [Source:RGD Symbol;Acc:1595925]
ENSRNOG00000043098	-1.46496	4.08031	3.53924e-05	0.000709563	Mt2A	metallothionein 2A [Source:RGD Symbol;Acc:1592345]
ENSRNOG00000058752	-1.45839	3.09893	2.44481e-05	0.000527216	Popdc2	popeye domain containing 2 [Source:RGD Symbol;Acc:735226]
ENSRNOG00000005960	-1.456	4.96944	2.42117e-06	7.24149e-05	RGD1311744	similar to RIKEN cDNA 5830475I06 [Source:RGD Symbol;Acc:1311744]
ENSRNOG00000013269	-1.45281	2.57939	0.000289791	0.00390578	Tnfsf10	tumor necrosis factor superfamily member 10 [Source:RGD Symbol;Acc:628734]
ENSRNOG00000012701	-1.45264	2.5164	6.47874e-05	0.0011808	Map7	microtubule-associated protein 7 [Source:RGD Symbol;Acc:1308866]
ENSRNOG00000016623	-1.45002	2.24004	4.5278e-07	1.72905e-05	Tmeff2	transmembrane protein with EGF-like and two follistatin-like domains 2 [Source:RGD Symbol;Acc:1308839]
ENSRNOG00000042903	-1.44925	3.10598	6.14084e-06	0.000163133	Cox7a2	cytochrome c oxidase subunit 7A2 [Source:RGD Symbol;Acc:68365]
ENSRNOG00000028945	-1.4471	5.26771	6.3736e-08	2.94171e-06	Tmem182	transmembrane protein 182 [Source:RGD Symbol;Acc:1563696]
ENSRNOG00000015357	-1.44662	3.04375	1.18363e-05	0.000284938	Bmper	BMP-binding endothelial regulator [Source:RGD Symbol;Acc:1563373]
ENSRNOG00000032443	-1.44657	5.58077	1.65606e-06	5.23371e-05	Lmod3	leiomodin 3 [Source:RGD Symbol;Acc:1564924]
ENSRNOG00000042274	-1.44219	5.12762	5.76722e-07	2.12032e-05	Fbxo31	F-box protein 31 [Source:RGD Symbol;Acc:1561069]
ENSRNOG00000015085	-1.44151	5.92327	3.65e-07	1.42784e-05	Dmpk	dystrophia myotonica-protein kinase [Source:RGD Symbol;Acc:1309825]
ENSRNOG00000015774	-1.43778	3.65316	0.000180611	0.00265455	Mreg	melanoregulin [Source:RGD Symbol;Acc:1562333]
ENSRNOG00000018485	-1.43578	3.327	3.15465e-05	0.00065076	Gpr155	G protein-coupled receptor 155 [Source:RGD Symbol;Acc:1309162]
ENSRNOG00000030743	-1.43313	6.73359	7.86892e-06	0.000201529	Myog	myogenin [Source:RGD Symbol;Acc:620432]
ENSRNOG00000049912	-1.42983	9.33854	3.363e-07	1.31959e-05	Atp5e	ATP synthase, H+ transporting, mitochondrial F1 complex, epsilon subunit [Source:RGD Symbol;Acc:621374]
ENSRNOG00000013000	-1.42783	5.26047	0.000358886	0.00465139	Ldhb	lactate dehydrogenase B [Source:RGD Symbol;Acc:2997]
ENSRNOG00000020981	-1.42749	0.207224	2.84016e-05	0.000598493	Prss46	protease, serine, 46 [Source:RGD Symbol;Acc:1302970]
ENSRNOG00000038218	-1.4151	4.61546	1.19162e-06	3.96107e-05	Ndufc1	NADH:ubiquinone oxidoreductase subunit C1 [Source:RGD Symbol;Acc:1586362]
ENSRNOG00000019219	-1.41469	2.41557	0.000204646	0.00295035	Vamp1	vesicle-associated membrane protein 1 [Source:RGD Symbol;Acc:3948]
ENSRNOG00000025140	-1.41407	3.93218	9.68661e-05	0.00162895	Zfat	zinc finger and AT hook domain containing [Source:RGD Symbol;Acc:1310886]
ENSRNOG00000009889	-1.41378	6.93131	7.60968e-07	2.71222e-05	Pgm1	phosphoglucomutase 1 [Source:RGD Symbol;Acc:3316]
ENSRNOG00000008785	-1.41196	4.76895	1.24518e-05	0.000298076	Klf5	Kruppel-like factor 5 [Source:RGD Symbol;Acc:621446]
ENSRNOG00000016214	-1.41107	6.07467	3.41063e-05	0.000690479	Agl	amylo-alpha-1, 6-glucosidase, 4-alpha-glucanotransferase [Source:RGD Symbol;Acc:1306376]
ENSRNOG00000045892	-1.40403	7.5571	2.30479e-09	1.30853e-07	Cfl2	cofilin 2 [Source:RGD Symbol;Acc:1306982]
ENSRNOG00000001376	-1.40158	4.81599	3.1325e-06	9.16524e-05	Mettl7a	methyltransferase like 7A [Source:RGD Symbol;Acc:1308407]
ENSRNOG00000002828	-1.40104	5.42669	2.64298e-06	7.85003e-05	Tob1	transducer of ErbB-2.1 [Source:RGD Symbol;Acc:621126]
ENSRNOG00000027212	-1.39785	1.55722	0.000106267	0.0017534	Tekt3	tektin 3 [Source:RGD Symbol;Acc:1310582]
ENSRNOG00000017420	-1.39513	1.31938	7.83659e-05	0.0013831	Nudt6	nudix hydrolase 6 [Source:RGD Symbol;Acc:621356]
ENSRNOG00000004483	-1.38912	1.67388	1.04732e-05	0.00025793	Ptprr	protein tyrosine phosphatase, receptor type, R [Source:RGD Symbol;Acc:620780]
ENSRNOG00000008806	-1.38045	1.53619	0.000328835	0.00432747	Clip4	CAP-GLY domain containing linker protein family, member 4 [Source:RGD Symbol;Acc:1311049]
ENSRNOG00000013408	-1.38009	3.20288	0.000426921	0.00534422	Npas2	neuronal PAS domain protein 2 [Source:RGD Symbol;Acc:1309681]
ENSRNOG00000030478	-1.38004	13.8243	3.22879e-06	9.37383e-05	AY172581.9
ENSRNOG00000025079	-1.37867	1.73955	6.72882e-05	0.00122034	Fam126b	family with sequence similarity 126, member B [Source:RGD Symbol;Acc:1309752]
ENSRNOG00000030371	-1.37366	16.2406	5.5813e-09	2.99639e-07	Mt-co2	mitochondrially encoded cytochrome c oxidase II [Source:RGD Symbol;Acc:621872]
ENSRNOG00000007102	-1.36711	3.34174	6.48075e-06	0.000170749	Acss1	acyl-CoA synthetase short-chain family member 1 [Source:RGD Symbol;Acc:1306246]
ENSRNOG00000048109	-1.35702	5.65423	7.68974e-07	2.73316e-05	LOC100365839	40S ribosomal protein S3a-like [Source:RGD Symbol;Acc:2318248]
ENSRNOG00000021079	-1.35493	6.02582	6.65584e-07	2.40567e-05	Fxyd1	FXYD domain-containing ion transport regulator 1 [Source:RGD Symbol;Acc:69306]
ENSRNOG00000018426	-1.3544	2.12429	0.000259444	0.00356417	Apoc1	apolipoprotein C1 [Source:RGD Symbol;Acc:2134]
ENSRNOG00000043866	-1.35369	14.6001	1.90986e-06	5.91919e-05	AY172581.24
ENSRNOG00000011754	-1.35113	5.03092	1.07139e-06	3.62717e-05	Myom2	myomesin 2 [Source:RGD Symbol;Acc:631437]
ENSRNOG00000010263	-1.34761	0.8623	0.000337525	0.00441917	Cldn11	claudin 11 [Source:RGD Symbol;Acc:71081]
ENSRNOG00000012794	-1.33613	3.43321	1.48666e-05	0.000347456	Grhpr	glyoxylate and hydroxypyruvate reductase [Source:RGD Symbol;Acc:1308851]
ENSRNOG00000010060	-1.3353	3.14637	0.0007988	0.00847759	Panx1	Pannexin 1 [Source:RGD Symbol;Acc:735204]
ENSRNOG00000000521	-1.33496	7.62599	3.27014e-07	1.29105e-05	Cdkn1a	cyclin-dependent kinase inhibitor 1A [Source:RGD Symbol;Acc:69328]
ENSRNOG00000007304	-1.3336	3.2526	1.06813e-05	0.00026205	Herc3	HECT and RLD domain containing E3 ubiquitin protein ligase 3 [Source:RGD Symbol;Acc:1307803]
ENSRNOG00000029778	-1.3329	1.99566	6.60795e-07	2.3951e-05	Maob	monoamine oxidase B [Source:RGD Symbol;Acc:3041]
ENSRNOG00000025145	-1.33267	4.78535	7.91729e-06	0.000202259	Rmdn1	regulator of microtubule dynamics 1 [Source:RGD Symbol;Acc:1563085]
ENSRNOG00000003283	-1.3315	5.2268	1.79758e-06	5.61188e-05	Rcsd1	RCSD domain containing 1 [Source:RGD Symbol;Acc:1304715]
ENSRNOG00000009073	-1.32741	8.36838	8.72278e-06	0.000220753	Tnni1	troponin I1, slow skeletal type [Source:RGD Symbol;Acc:621765]
ENSRNOG00000003777	-1.32528	3.58761	2.51427e-05	0.000539474	Chrne	cholinergic receptor nicotinic epsilon subunit [Source:RGD Symbol;Acc:2353]
ENSRNOG00000040350	-1.32509	7.23877	2.17542e-05	0.000483757	Mir675	microRNA 675 [Source:RGD Symbol;Acc:2314883]
ENSRNOG00000014705	-1.32498	3.19909	0.000570824	0.00665611	Rbm20	RNA binding motif protein 20 [Source:RGD Symbol;Acc:1307427]
ENSRNOG00000012659	-1.31341	2.76528	3.08704e-05	0.000637839	Vamp5	vesicle-associated membrane protein 5 [Source:RGD Symbol;Acc:620419]
ENSRNOG00000060123	-1.31042	1.67926	2.0961e-05	0.000468555	Kifc2	kinesin family member C2 [Source:RGD Symbol;Acc:735021]
ENSRNOG00000025624	-1.30858	3.08485	5.35285e-06	0.000144594	Arhgap20	Rho GTPase activating protein 20 [Source:RGD Symbol;Acc:1303160]
ENSRNOG00000007281	-1.30519	7.85764	3.35653e-08	1.63135e-06	Flnc	filamin C [Source:RGD Symbol;Acc:1308807]
ENSRNOG00000002839	-1.30476	2.01569	0.000153462	0.00233828	Slc19a2	solute carrier family 19 member 2 [Source:RGD Symbol;Acc:1308611]
ENSRNOG00000039551	-1.30263	4.06926	1.50764e-05	0.000351718	Rdh14	retinol dehydrogenase 14 (all-trans/9-cis/11-cis) [Source:RGD Symbol;Acc:1565196]
ENSRNOG00000036601	-1.30167	3.98247	6.08233e-05	0.00111809	Exoc6	exocyst complex component 6 [Source:RGD Symbol;Acc:3653]
ENSRNOG00000015588	-1.29877	6.21066	4.84697e-08	2.30339e-06	Nol3	nucleolar protein 3 [Source:RGD Symbol;Acc:708558]
ENSRNOG00000043203	-1.29574	1.96534	0.00038168	0.00489244	Krt75	keratin 75 [Source:RGD Symbol;Acc:1359576]
ENSRNOG00000017481	-1.29218	6.99515	6.30066e-07	2.29019e-05	Sucla2	succinate-CoA ligase ADP-forming beta subunit [Source:RGD Symbol;Acc:1309397]
ENSRNOG00000021198	-1.29218	6.15122	5.95946e-07	2.17852e-05	Hist1h2bcl1	histone cluster 1, H2bc-like 1 [Source:RGD Symbol;Acc:1591796]
ENSRNOG00000020296	-1.2916	5.21389	4.52454e-05	0.000866483	LOC103693430	up-regulated during skeletal muscle growth protein 5 [Source:RGD Symbol;Acc:9203006]
ENSRNOG00000026302	-1.28935	4.78641	0.000104611	0.00173418	Lrrn4cl	LRRN4 C-terminal like [Source:RGD Symbol;Acc:1597359]
ENSRNOG00000006608	-1.28895	4.72344	0.000251847	0.00349979	Tmem70	transmembrane protein 70 [Source:RGD Symbol;Acc:1566224]
ENSRNOG00000006320	-1.28476	2.59877	4.43206e-05	0.000850041	Ptges	prostaglandin E synthase [Source:RGD Symbol;Acc:62076]
ENSRNOG00000018951	-1.27451	2.69565	0.000979697	0.00984377	Col4a5	collagen type IV alpha 5 chain [Source:RGD Symbol;Acc:1565499]
ENSRNOG00000011140	-1.27379	2.67284	4.702e-06	0.000130305	Fam213a	family with sequence similarity 213, member A [Source:RGD Symbol;Acc:1309676]
ENSRNOG00000000610	-1.26947	6.51063	6.79544e-07	2.44922e-05	Cisd1	CDGSH iron sulfur domain 1 [Source:RGD Symbol;Acc:1309529]
ENSRNOG00000004980	-1.26193	4.95038	8.51401e-05	0.00147427	Rangrf	RAN guanine nucleotide release factor [Source:RGD Symbol;Acc:1563195]
ENSRNOG00000013468	-1.26092	3.04086	9.27491e-06	0.00023108	Fam213b	family with sequence similarity 213, member B [Source:RGD Symbol;Acc:1308251]
ENSRNOG00000005765	-1.26054	5.08422	1.29918e-06	4.29634e-05	Ap4s1	adaptor-related protein complex 4, sigma 1 subunit [Source:RGD Symbol;Acc:1311990]
ENSRNOG00000047309	-1.25857	2.36583	3.1358e-06	9.16524e-05	Smim10l1	small integral membrane protein 10 like 1 [Source:RGD Symbol;Acc:2322729]
ENSRNOG00000039971	-1.25782	4.3167	3.65197e-06	0.000104362	Ctla2a	cytotoxic T lymphocyte-associated protein 2 alpha [Source:RGD Symbol;Acc:1565540]
ENSRNOG00000012443	-1.25679	4.59216	3.74942e-05	0.000743567	Cpt2	carnitine palmitoyltransferase 2 [Source:RGD Symbol;Acc:2398]
ENSRNOG00000002365	-1.25535	8.87199	3.41177e-05	0.000690479	Itm2a	integral membrane protein 2A [Source:RGD Symbol;Acc:1559423]
ENSRNOG00000018906	-1.25465	1.8484	0.000484892	0.00588614	Ghdc	GH3 domain containing [Source:RGD Symbol;Acc:1308881]
ENSRNOG00000052802	-1.25341	10.1614	1.70475e-06	5.37436e-05	Aldoa	aldolase, fructose-bisphosphate A [Source:RGD Symbol;Acc:2089]
ENSRNOG00000010402	-1.24941	3.84664	0.000271952	0.00370426	Hspb2	heat shock protein family B (small) member 2 [Source:RGD Symbol;Acc:70914]
ENSRNOG00000045961	-1.24749	3.28834	1.15032e-05	0.000279541	Lyrm7	LYR motif containing 7 [Source:RGD Symbol;Acc:1596391]
ENSRNOG00000003229	-1.24165	4.74081	3.04831e-06	8.97084e-05	Tspan7	tetraspanin 7 [Source:RGD Symbol;Acc:1589725]
ENSRNOG00000000443	-1.24151	3.6599	0.000863457	0.00896361	C4a	complement component 4A (Rodgers blood group) [Source:RGD Symbol;Acc:620005]
ENSRNOG00000001991	-1.24021	8.29212	8.45981e-06	0.000214521	Atp5o	ATP synthase, H+ transporting, mitochondrial F1 complex, O subunit [Source:RGD Symbol;Acc:621379]
ENSRNOG00000033615	-1.23782	12.1625	1.48485e-05	0.000347456	Mt-nd3	mitochondrially encoded NADH dehydrogenase 3 [Source:RGD Symbol;Acc:620557]
ENSRNOG00000011360	-1.23435	3.23016	0.000206345	0.00296547	Dkk2	dickkopf WNT signaling pathway inhibitor 2 [Source:RGD Symbol;Acc:1308639]
ENSRNOG00000004000	-1.23057	2.72712	2.96474e-05	0.000621577	Tefm	transcription elongation factor, mitochondrial [Source:RGD Symbol;Acc:1306595]
ENSRNOG00000050843	-1.22388	4.58156	0.000120205	0.00191835	Mut	methylmalonyl CoA mutase [Source:RGD Symbol;Acc:1587662]
ENSRNOG00000000064	-1.21786	7.55584	0.000332649	0.00436424	Atp5i	ATP synthase, H+ transporting, mitochondrial Fo complex, subunit E [Source:RGD Symbol;Acc:621377]
ENSRNOG00000009951	-1.21732	4.45676	8.03518e-05	0.00140462	Aif1l	allograft inflammatory factor 1-like [Source:RGD Symbol;Acc:1305081]
ENSRNOG00000030021	-1.21564	6.14601	0.000216523	0.00308524	Ccl6	chemokine (C-C motif) ligand 6 [Source:RGD Symbol;Acc:1303200]
ENSRNOG00000029911	-1.20738	6.49263	0.000746972	0.00806767	Cilp	cartilage intermediate layer protein [Source:RGD Symbol;Acc:1305124]
ENSRNOG00000004040	-1.20547	1.71774	0.000934483	0.0095086	Abca8	ATP binding cassette subfamily A member 8 [Source:RGD Symbol;Acc:1307069]
ENSRNOG00000015654	-1.20406	3.99304	5.25776e-06	0.000142326	Ghr	growth hormone receptor [Source:RGD Symbol;Acc:2687]
ENSRNOG00000010633	-1.20231	5.58355	1.79251e-06	5.60967e-05	Acsl1	acyl-CoA synthetase long-chain family member 1 [Source:RGD Symbol;Acc:2015]
ENSRNOG00000042962	-1.20193	3.96853	4.03218e-05	0.000787472	Pdss2	decaprenyl diphosphate synthase subunit 2 [Source:RGD Symbol;Acc:1359372]
ENSRNOG00000020563	-1.19812	3.33953	8.48014e-05	0.00147039	Cma1	chymase 1 [Source:RGD Symbol;Acc:2365]
ENSRNOG00000005574	-1.19775	1.84405	1.49497e-07	6.30986e-06	Adamts8	ADAM metallopeptidase with thrombospondin type 1 motif, 8 [Source:RGD Symbol;Acc:1308511]
ENSRNOG00000010077	-1.19144	5.30897	9.1022e-06	0.000228106	Smarcd3	SWI/SNF related, matrix associated, actin dependent regulator of chromatin, subfamily d, member 3 [Source:RGD Symbol;Acc:1311869]
ENSRNOG00000016085	-1.19017	0.65175	6.05281e-05	0.00111461	Mpzl2	myelin protein zero-like 2 [Source:RGD Symbol;Acc:1307196]
ENSRNOG00000054609	-1.18991	6.42349	1.10822e-06	3.74198e-05	AABR07002683.1
ENSRNOG00000018655	-1.18911	5.44146	8.902e-06	0.000223964	Adsl	adenylosuccinate lyase [Source:RGD Symbol;Acc:1307617]
ENSRNOG00000012852	-1.18882	7.66802	1.52581e-06	4.89441e-05	Bin1	bridging integrator 1 [Source:RGD Symbol;Acc:621786]
ENSRNOG00000014168	-1.18311	4.41342	3.48937e-06	0.000100161	Xylb	xylulokinase [Source:RGD Symbol;Acc:1307372]
ENSRNOG00000030700	-1.18226	15.6696	7.98425e-07	2.82277e-05	Mt-cox3	mitochondrially encoded cytochrome C oxidase III [Source:RGD Symbol;Acc:621873]
ENSRNOG00000012512	-1.18138	6.03313	1.77303e-05	0.000406972	Nexn	nexilin (F actin binding protein) [Source:RGD Symbol;Acc:708354]
ENSRNOG00000001815	-1.17459	7.8822	5.46551e-07	2.03269e-05	Eif4a2	eukaryotic translation initiation factor 4A2 [Source:RGD Symbol;Acc:1309225]
ENSRNOG00000061768	-1.169	2.41348	8.96466e-08	4.0502e-06	Slc43a3	solute carrier family 43, member 3 [Source:RGD Symbol;Acc:1312016]
ENSRNOG00000015385	-1.16677	7.10431	0.00014622	0.0022442	Pink1	PTEN induced putative kinase 1 [Source:RGD Symbol;Acc:1305769]
ENSRNOG00000021510	-1.16537	2.03092	0.000782889	0.00834323	Tbc1d10c	TBC1 domain family, member 10C [Source:RGD Symbol;Acc:1311490]
ENSRNOG00000059500	-1.16305	7.37971	3.94898e-06	0.000111606	Cdkn1c	cyclin-dependent kinase inhibitor 1C [Source:RGD Symbol;Acc:727892]
ENSRNOG00000016971	-1.15929	0.818298	0.000332065	0.00436103	Zfp612	zinc finger protein 612 [Source:RGD Symbol;Acc:1307197]
ENSRNOG00000004003	-1.15828	3.6318	0.000172253	0.00256105	Dusp10	dual specificity phosphatase 10 [Source:RGD Symbol;Acc:1310844]
ENSRNOG00000021206	-1.15727	5.35544	0.000179255	0.00264371	Pla2g16	phospholipase A2, group XVI [Source:RGD Symbol;Acc:2829]
ENSRNOG00000019254	-1.1522	4.37705	3.68946e-05	0.000736228	Dyrk1b	dual specificity tyrosine phosphorylation regulated kinase 1B [Source:RGD Symbol;Acc:1307223]
ENSRNOG00000051307	-1.15133	6.62121	0.000200767	0.00290422	Aoc3	amine oxidase, copper containing 3 [Source:RGD Symbol;Acc:62058]
ENSRNOG00000014352	-1.14599	2.31852	1.0535e-05	0.000258954	Smim12	small integral membrane protein 12 [Source:RGD Symbol;Acc:1591379]
ENSRNOG00000010453	-1.14504	5.36713	1.94629e-05	0.000439664	Klhl7	kelch-like family member 7 [Source:RGD Symbol;Acc:1305564]
ENSRNOG00000018715	-1.14438	5.64919	1.90978e-05	0.000434474	Clec10a	C-type lectin domain family 10, member A [Source:RGD Symbol;Acc:621158]
ENSRNOG00000009364	-1.14309	8.01423	6.03407e-06	0.000160629	Ndufb9	NADH:ubiquinone oxidoreductase subunit B9 [Source:RGD Symbol;Acc:1307114]
ENSRNOG00000016671	-1.14238	2.82841	0.000372267	0.00478614	Dtna	dystrobrevin, alpha [Source:RGD Symbol;Acc:1561985]
ENSRNOG00000038868	-1.14006	2.84214	1.11346e-05	0.000272131	Iqcb1	IQ motif containing B1 [Source:RGD Symbol;Acc:1310069]
ENSRNOG00000009974	-1.13813	4.4146	2.18688e-05	0.000485464	Coq3	coenzyme Q3 methyltransferase [Source:RGD Symbol;Acc:2380]
ENSRNOG00000013659	-1.13695	4.32247	1.00919e-05	0.000250463	Tex2	testis expressed 2 [Source:RGD Symbol;Acc:1305112]
ENSRNOG00000011680	-1.13495	3.49965	4.02718e-06	0.000113318	Il16	interleukin 16 [Source:RGD Symbol;Acc:1583872]
ENSRNOG00000007316	-1.13405	6.76747	1.5768e-05	0.00036454	Idh3B	isocitrate dehydrogenase 3 (NAD+) beta [Source:RGD Symbol;Acc:621881]
ENSRNOG00000019662	-1.13314	5.54961	1.54069e-05	0.000358572	Tm6sf1	transmembrane 6 superfamily member 1 [Source:RGD Symbol;Acc:1307978]
ENSRNOG00000006068	-1.12954	3.64488	0.000164524	0.00246325	Tmem117	transmembrane protein 117 [Source:RGD Symbol;Acc:1562562]
ENSRNOG00000004893	-1.12844	3.36927	0.000153595	0.00233828	Atp5s	ATP synthase, H+ transporting, mitochondrial Fo complex, subunit s (factor B) [Source:RGD Symbol;Acc:1359208]
ENSRNOG00000004730	-1.12544	3.11881	1.91755e-05	0.000434701	Meis2	Meis homeobox 2 [Source:RGD Symbol;Acc:1305198]
ENSRNOG00000016356	-1.12484	6.53086	4.59003e-05	0.000877714	Got1	glutamic-oxaloacetic transaminase 1 [Source:RGD Symbol;Acc:2721]
ENSRNOG00000042939	-1.12297	0.072027	0.000317793	0.00421675	Nrip2	nuclear receptor interacting protein 2 [Source:RGD Symbol;Acc:1589959]
ENSRNOG00000016243	-1.12054	6.67501	0.000839617	0.00879439	Casq2	calsequestrin 2 [Source:RGD Symbol;Acc:2276]
ENSRNOG00000006364	-1.11881	6.81227	3.58568e-05	0.000717752	Dld	dihydrolipoamide dehydrogenase [Source:RGD Symbol;Acc:735073]
ENSRNOG00000001653	-1.11757	3.26566	0.000718108	0.00786182	St3gal6	ST3 beta-galactoside alpha-2,3-sialyltransferase 6 [Source:RGD Symbol;Acc:1303279]
ENSRNOG00000061379	-1.11095	4.20908	0.000121358	0.00193434	C7	complement C7 [Source:RGD Symbol;Acc:620318]
ENSRNOG00000034234	-1.11054	16.6862	1.30193e-05	0.000309928	Mt-co1	mitochondrially encoded cytochrome c oxidase 1 [Source:RGD Symbol;Acc:621871]
ENSRNOG00000011659	-1.10938	4.78197	9.14146e-05	0.00154946	Alpk3	alpha-kinase 3 [Source:RGD Symbol;Acc:1309860]
ENSRNOG00000050646	-1.1073	4.69856	9.05087e-05	0.00153817	Fem1a	fem-1 homolog A [Source:RGD Symbol;Acc:1561112]
ENSRNOG00000020339	-1.10651	3.78131	0.000126305	0.00199584	Neurl1	neuralized E3 ubiquitin protein ligase 1 [Source:RGD Symbol;Acc:1307021]
ENSRNOG00000052421	-1.10364	0.253081	0.000583141	0.00674885	AABR07012475.2
ENSRNOG00000031979	-1.0954	16.4625	1.59108e-06	5.05325e-05	Mt-atp6	mitochondrially encoded ATP synthase 6 [Source:RGD Symbol;Acc:621239]
ENSRNOG00000007884	-1.09529	5.4141	0.00015767	0.00238568	Bcap29	B-cell receptor-associated protein 29 [Source:RGD Symbol;Acc:1359431]
ENSRNOG00000000172	-1.0951	3.55774	0.000216649	0.00308524	Sqrdl	sulfide quinone reductase-like (yeast) [Source:RGD Symbol;Acc:1564504]
ENSRNOG00000043192	-1.09148	5.04682	0.000117526	0.00188262	Hacd1	3-hydroxyacyl-CoA dehydratase 1 [Source:RGD Symbol;Acc:1595507]
ENSRNOG00000018166	-1.08945	4.05144	6.60883e-05	0.00120281	Prkab2	protein kinase AMP-activated non-catalytic subunit beta 2 [Source:RGD Symbol;Acc:620905]
ENSRNOG00000011383	-1.08769	6.79576	1.88525e-05	0.00043042	Ndufs4	NADH:ubiquinone oxidoreductase subunit S4 [Source:RGD Symbol;Acc:1594380]
ENSRNOG00000009276	-1.08702	5.68866	0.000604332	0.00695615	Schip1	schwannomin interacting protein 1 [Source:RGD Symbol;Acc:1309962]
ENSRNOG00000007433	-1.08485	2.3009	0.000512716	0.00615979	Cyb561	cytochrome b-561 [Source:RGD Symbol;Acc:1310987]
ENSRNOG00000012236	-1.08447	5.24418	7.4597e-05	0.00133062	Hddc3	HD domain containing 3 [Source:RGD Symbol;Acc:1311839]
ENSRNOG00000042821	-1.084	7.53169	0.000181442	0.00266067	Cd59	CD59 molecule [Source:RGD Symbol;Acc:2311]
ENSRNOG00000008961	-1.0751	4.46829	0.000304794	0.00407376	Mapre3	microtubule-associated protein, RP/EB family, member 3 [Source:RGD Symbol;Acc:1359297]
ENSRNOG00000012989	-1.07464	3.64796	8.03249e-05	0.00140462	Serinc2	serine incorporator 2 [Source:RGD Symbol;Acc:1311396]
ENSRNOG00000011684	-1.07398	4.87306	0.000139065	0.00216022	Auh	AU RNA binding methylglutaconyl-CoA hydratase [Source:RGD Symbol;Acc:1306087]
ENSRNOG00000031033	-1.07232	15.3266	2.6526e-06	7.86039e-05	Mt-nd2	mitochondrially encoded NADH dehydrogenase 2 [Source:RGD Symbol;Acc:620556]
ENSRNOG00000025676	-1.07098	1.26272	0.000676408	0.00754039	Fam198a	family with sequence similarity 198, member A [Source:RGD Symbol;Acc:1305157]
ENSRNOG00000006931	-1.06538	3.94267	0.000128944	0.00202506	Eepd1	endonuclease/exonuclease/phosphatase family domain containing 1 [Source:RGD Symbol;Acc:1307401]
ENSRNOG00000026616	-1.0642	6.76921	0.000102148	0.00170133	Ndufb2	NADH:ubiquinone oxidoreductase subunit B2 [Source:RGD Symbol;Acc:1308130]
ENSRNOG00000032414	-1.06346	0.315663	0.000301233	0.00403512	Tmem161b	transmembrane protein 161B [Source:RGD Symbol;Acc:1309660]
ENSRNOG00000011901	-1.06308	4.12559	0.000274537	0.00373551	Rrad	RRAD, Ras related glycolysis inhibitor and calcium channel regulator [Source:RGD Symbol;Acc:69357]
ENSRNOG00000022347	-1.06159	3.62697	5.01567e-05	0.000949204	Fam173b	family with sequence similarity 173, member B [Source:RGD Symbol;Acc:1560629]
ENSRNOG00000005512	-1.05764	7.91111	0.000154566	0.00234981	Ndufa4	NADH:ubiquinone oxidoreductase subunit A4 [Source:RGD Symbol;Acc:1584719]
ENSRNOG00000061005	-1.05722	2.60341	0.000141351	0.00218408	AABR07016572.1
ENSRNOG00000039091	-1.05555	6.09764	8.53903e-05	0.00147643	Pnpla8	patatin-like phospholipase domain containing 8 [Source:RGD Symbol;Acc:1311444]
ENSRNOG00000012354	-1.05313	4.84599	0.000105814	0.00174962	Trim23	tripartite motif-containing 23 [Source:RGD Symbol;Acc:621587]
ENSRNOG00000047198	-1.05122	3.7582	0.000162739	0.00244223	Tatdn1	TatD DNase domain containing 1 [Source:RGD Symbol;Acc:1585145]
ENSRNOG00000039850	-1.05075	5.70068	5.3065e-05	0.00099882	Pigp	phosphatidylinositol glycan anchor biosynthesis, class P [Source:RGD Symbol;Acc:1307205]
ENSRNOG00000053615	-1.05022	5.17949	3.26987e-05	0.00066915	Mrpl50	mitochondrial ribosomal protein L50 [Source:RGD Symbol;Acc:1308008]
ENSRNOG00000004621	-1.04622	8.52892	0.00018117	0.00265972	Rtn4	reticulon 4 [Source:RGD Symbol;Acc:620989]
ENSRNOG00000019817	-1.04469	3.37804	0.000102231	0.00170133	Ddx28	DEAD-box helicase 28 [Source:RGD Symbol;Acc:1311976]
ENSRNOG00000019522	-1.04399	4.11333	2.44467e-05	0.000527216	Narfl	nuclear prelamin A recognition factor-like [Source:RGD Symbol;Acc:1305982]
ENSRNOG00000017571	-1.04325	6.92688	8.54951e-05	0.00147643	Ndufa2	NADH:ubiquinone oxidoreductase subunit A2 [Source:RGD Symbol;Acc:1309997]
ENSRNOG00000054689	-1.04248	7.5906	8.9757e-05	0.00152848	Cox7b	cytochrome c oxidase subunit 7B [Source:RGD Symbol;Acc:727789]
ENSRNOG00000017243	-1.04206	5.24921	0.000716291	0.00784862	Bnip3	BCL2 interacting protein 3 [Source:RGD Symbol;Acc:620800]
ENSRNOG00000004629	-1.04084	7.89598	0.000109165	0.00177753	Fkbp3	FK506 binding protein 3 [Source:RGD Symbol;Acc:1304992]
ENSRNOG00000029574	-1.0404	5.15952	9.74413e-05	0.00163648	Rps4x	ribosomal protein S4, X-linked [Source:RGD Symbol;Acc:2324318]
ENSRNOG00000005698	-1.03382	6.73381	0.000323906	0.00428016	Ndufa5	NADH:ubiquinone oxidoreductase subunit A5 [Source:RGD Symbol;Acc:3155]
ENSRNOG00000017063	-1.03362	5.03812	0.000556431	0.00654795	Fcna	ficolin A [Source:RGD Symbol;Acc:621221]
ENSRNOG00000015691	-1.03307	3.21402	8.96684e-05	0.00152848	Fam212b	family with sequence similarity 212, member B [Source:RGD Symbol;Acc:1306526]
ENSRNOG00000061213	-1.03209	5.51547	0.000903297	0.00926475	Mrps36	mitochondrial ribosomal protein S36 [Source:RGD Symbol;Acc:1309315]
ENSRNOG00000019660	-1.03188	2.25318	0.000649062	0.00731995	Spib	Spi-B transcription factor [Source:RGD Symbol;Acc:1565899]
ENSRNOG00000009845	-1.0285	6.14673	0.000254163	0.00351581	Acadm	acyl-CoA dehydrogenase, C-4 to C-12 straight chain [Source:RGD Symbol;Acc:2012]
ENSRNOG00000005018	-1.02798	0.839947	3.53179e-05	0.000709178	Scn2a	sodium voltage-gated channel alpha subunit 2 [Source:RGD Symbol;Acc:3632]
ENSRNOG00000022777	-1.02773	6.10165	5.87298e-05	0.00108896	Six1	SIX homeobox 1 [Source:RGD Symbol;Acc:620906]
ENSRNOG00000008569	-1.02623	6.85279	0.00014311	0.00220438	Ndufa6	NADH:ubiquinone oxidoreductase subunit A6 [Source:RGD Symbol;Acc:1309818]
ENSRNOG00000036917	-1.02605	4.22698	4.28814e-05	0.000828632	Amn1	antagonist of mitotic exit network 1 homolog [Source:RGD Symbol;Acc:1308119]
ENSRNOG00000022555	-1.02524	1.41252	0.000751122	0.00809206	LOC497899	similar to hypothetical protein 4930503F14 [Source:RGD Symbol;Acc:1561674]
ENSRNOG00000013463	-1.02515	3.78469	0.000212456	0.00303228	Kcnj8	potassium voltage-gated channel subfamily J member 8 [Source:RGD Symbol;Acc:2960]
ENSRNOG00000012314	-1.02198	5.20841	5.67407e-05	0.00105666	Slirp	SRA stem-loop interacting RNA binding protein [Source:RGD Symbol;Acc:1585290]
ENSRNOG00000014030	-1.01951	4.75728	0.000669971	0.00748303	Synm	synemin [Source:RGD Symbol;Acc:727872]
ENSRNOG00000016834	-1.01901	3.65251	0.000465575	0.00570019	Wdr37	WD repeat domain 37 [Source:RGD Symbol;Acc:1306189]
ENSRNOG00000025143	-1.01851	3.75354	3.2935e-05	0.000672913	Icam2	intercellular adhesion molecule 2 [Source:RGD Symbol;Acc:1359660]
ENSRNOG00000055020	-1.01697	2.01795	0.000776813	0.00828536	Rn60_X_0648.1
ENSRNOG00000017552	-1.01466	5.23192	9.49736e-05	0.00160554	Mrpl34	mitochondrial ribosomal protein L34 [Source:RGD Symbol;Acc:1359397]
ENSRNOG00000036971	-1.01459	4.64104	0.000192069	0.00279732	RGD1566320	RGD1566320 [Source:RGD Symbol;Acc:1566320]
ENSRNOG00000010830	-1.01054	9.69036	0.000314686	0.00419287	Slc25a4	solute carrier family 25 member 4 [Source:RGD Symbol;Acc:620352]
ENSRNOG00000008566	-1.01007	6.77339	0.000142068	0.00219096	Mrpl15	mitochondrial ribosomal protein L15 [Source:RGD Symbol;Acc:1304796]
ENSRNOG00000022980	-1.00902	7.14681	0.00017073	0.00254135	Sdhd	succinate dehydrogenase complex subunit D [Source:RGD Symbol;Acc:735231]
ENSRNOG00000002876	-1.00837	1.86026	0.000230719	0.00325313	Eef2kmt	eukaryotic elongation factor 2 lysine methyltransferase [Source:RGD Symbol;Acc:1304969]
ENSRNOG00000020607	-1.0047	5.24848	0.00026082	0.00357924	Bckdha	branched chain ketoacid dehydrogenase E1, alpha polypeptide [Source:RGD Symbol;Acc:2196]
ENSRNOG00000033134	-1.0038	7.55821	0.00037973	0.00487719	Mef2c	myocyte enhancer factor 2C [Source:RGD Symbol;Acc:1563119]
ENSRNOG00000003687	-1.00209	4.5437	7.95043e-05	0.00139934	Rgs2	regulator of G-protein signaling 2 [Source:RGD Symbol;Acc:621665]
ENSRNOG00000028884	-0.999906	8.32282	0.000168847	0.00251916	Atp5l	ATP synthase, H+ transporting, mitochondrial Fo complex, subunit G [Source:RGD Symbol;Acc:1303259]
ENSRNOG00000017955	-0.999486	3.42983	0.000941219	0.00955731	Nudt8	nudix hydrolase 8 [Source:RGD Symbol;Acc:1309040]
ENSRNOG00000018859	-0.995976	3.96284	0.000646711	0.00730891	Pik3ip1	phosphoinositide-3-kinase interacting protein 1 [Source:RGD Symbol;Acc:1311203]
ENSRNOG00000037206	-0.994871	3.25756	0.000434655	0.00541252	Ccdc77	coiled-coil domain containing 77 [Source:RGD Symbol;Acc:1310710]
ENSRNOG00000007336	-0.992063	5.2266	0.000242833	0.00339411	Churc1	churchill domain containing 1 [Source:RGD Symbol;Acc:1305116]
ENSRNOG00000004820	-0.990217	6.62958	0.000429486	0.00537108	Sar1b	secretion associated, Ras related GTPase 1B [Source:RGD Symbol;Acc:1305590]
ENSRNOG00000009888	-0.988295	6.56855	8.72136e-05	0.00149604	Timm8b	translocase of inner mitochondrial membrane 8 homolog B [Source:RGD Symbol;Acc:619840]
ENSRNOG00000018061	-0.984647	3.46978	9.62539e-05	0.00162078	Tmem80	transmembrane protein 80 [Source:RGD Symbol;Acc:1308399]
ENSRNOG00000018408	-0.982613	4.40049	0.000703228	0.00775848	RGD1307554	similar to CG16812-PA [Source:RGD Symbol;Acc:1307554]
ENSRNOG00000032777	-0.9763	4.40824	0.000234605	0.00330429	Rpl26-ps1	ribosomal protein L26, pseudogene 1 [Source:RGD Symbol;Acc:1590264]
ENSRNOG00000016322	-0.971246	2.64251	0.00012813	0.00201475	Camk2n1	calcium/calmodulin-dependent protein kinase II inhibitor 1 [Source:RGD Symbol;Acc:708430]
ENSRNOG00000010408	-0.970258	5.16914	0.000382694	0.00490055	Polr2k	RNA polymerase II subunit K [Source:RGD Symbol;Acc:2319895]
ENSRNOG00000020148	-0.964391	0.900804	0.000639742	0.00725135	Il4i1	interleukin 4 induced 1 [Source:RGD Symbol;Acc:1304831]
ENSRNOG00000003150	-0.964369	5.61692	0.000438561	0.00544214	Mpc2	mitochondrial pyruvate carrier 2 [Source:RGD Symbol;Acc:1563422]
ENSRNOG00000012966	-0.96431	6.83905	0.000255412	0.00352766	Acadl	acyl-CoA dehydrogenase, long chain [Source:RGD Symbol;Acc:2011]
ENSRNOG00000027491	-0.963755	5.64606	0.000156284	0.00237031	Vldlr	very low density lipoprotein receptor [Source:RGD Symbol;Acc:3963]
ENSRNOG00000009155	-0.960533	6.6594	0.00064575	0.00730655	Ndufs3	NADH dehydrogenase (ubiquinone) Fe-S protein 3 [Source:RGD Symbol;Acc:1309406]
ENSRNOG00000010807	-0.95892	8.13045	0.000867631	0.00899966	Cox6c	cytochrome c oxidase subunit 6C [Source:RGD Symbol;Acc:620616]
ENSRNOG00000051039	-0.956992	3.98106	0.000276246	0.00375478	LOC108349594	uncharacterized LOC108349594 [Source:RGD Symbol;Acc:11468822]
ENSRNOG00000004829	-0.956585	4.74886	0.000527211	0.00628685	Immp1l	inner mitochondrial membrane peptidase subunit 1 [Source:RGD Symbol;Acc:1587441]
ENSRNOG00000028449	-0.955052	2.43384	0.00025428	0.00351581	LOC100360449	ribosomal protein L9-like [Source:RGD Symbol;Acc:2322107]
ENSRNOG00000038330	-0.950042	2.78036	2.67824e-05	0.000570839	RGD1359508	similar to protein C33A12.3 [Source:RGD Symbol;Acc:1359508]
ENSRNOG00000042201	-0.949631	0.964248	0.000386324	0.00492246	Efcab2	EF-hand calcium binding domain 2 [Source:RGD Symbol;Acc:1308593]
ENSRNOG00000015756	-0.946403	5.37533	0.000176615	0.00261076	Nphp1	nephrocystin 1 [Source:RGD Symbol;Acc:1308136]
ENSRNOG00000016062	-0.944959	5.50964	0.000906389	0.00928904	Snta1	syntrophin, alpha 1 [Source:RGD Symbol;Acc:1307068]
ENSRNOG00000036572	-0.939798	1.73672	0.000647099	0.00730891	Sfxn4	sideroflexin 4 [Source:RGD Symbol;Acc:1306088]
ENSRNOG00000012873	-0.93921	5.6962	0.000335787	0.0044009	Gfm1	G elongation factor, mitochondrial 1 [Source:RGD Symbol;Acc:631396]
ENSRNOG00000011541	-0.934082	5.2938	0.000103134	0.00171414	Cygb	cytoglobin [Source:RGD Symbol;Acc:69415]
ENSRNOG00000025909	-0.931193	6.07213	0.000697382	0.00771238	Uqcc2	ubiquinol-cytochrome c reductase complex assembly factor 2 [Source:RGD Symbol;Acc:1306917]
ENSRNOG00000026953	-0.931171	3.7473	0.000119895	0.00191578	Gpr88	G-protein coupled receptor 88 [Source:RGD Symbol;Acc:61921]
ENSRNOG00000014624	-0.926317	6.25067	0.000258005	0.00355938	Selenok	selenoprotein K [Source:RGD Symbol;Acc:1303129]
ENSRNOG00000007512	-0.925484	6.76103	0.000116707	0.00187184	Srp14	signal recognition particle 14 [Source:RGD Symbol;Acc:1308506]
ENSRNOG00000000130	-0.9253	5.28467	0.000749692	0.00808761	Dnajb5	DnaJ heat shock protein family (Hsp40) member B5 [Source:RGD Symbol;Acc:1307453]
ENSRNOG00000008329	-0.923713	7.10309	0.000837393	0.00877826	Ndufb11	NADH:ubiquinone oxidoreductase subunit B11 [Source:RGD Symbol;Acc:1563698]
ENSRNOG00000023484	-0.917255	4.51402	0.000361366	0.00467408	Rpap2	RNA polymerase II associated protein 2 [Source:RGD Symbol;Acc:1309034]
ENSRNOG00000004351	-0.916284	2.11248	0.000543114	0.00642699	Slc25a29	solute carrier family 25 member 29 [Source:RGD Symbol;Acc:1308104]
ENSRNOG00000051816	-0.91324	2.92297	0.000200234	0.00289978	Tigar	TP53 induced glycolysis regulatory phosphatase [Source:RGD Symbol;Acc:1560038]
ENSRNOG00000001205	-0.910872	3.77392	0.00028335	0.00383914	Agpat3	1-acylglycerol-3-phosphate O-acyltransferase 3 [Source:RGD Symbol;Acc:1305787]
ENSRNOG00000016038	-0.910421	4.10413	0.000862305	0.00895889	Mgmt	O-6-methylguanine-DNA methyltransferase [Source:RGD Symbol;Acc:3087]
ENSRNOG00000038951	-0.906942	6.1292	0.000958417	0.00969066	Cox17	COX17 cytochrome c oxidase copper chaperone [Source:RGD Symbol;Acc:620548]
ENSRNOG00000013961	-0.903953	6.87236	0.000131454	0.00205944	Ghitm	growth hormone inducible transmembrane protein [Source:RGD Symbol;Acc:1359301]
ENSRNOG00000024066	-0.903322	4.88323	0.00055137	0.00649645	Fundc2	FUN14 domain containing 2 [Source:RGD Symbol;Acc:1560916]
ENSRNOG00000007325	-0.898097	5.3041	0.000371676	0.00478332	Usp28	ubiquitin specific peptidase 28 [Source:RGD Symbol;Acc:1311555]
ENSRNOG00000004214	-0.892106	7.60849	0.000134779	0.00210213	Rpl26	ribosomal protein L26 [Source:RGD Symbol;Acc:1310607]
ENSRNOG00000037137	-0.891394	1.95133	0.000683414	0.00759211	Svip	small VCP interacting protein [Source:RGD Symbol;Acc:1565432]
ENSRNOG00000031766	-0.888759	15.644	0.000187558	0.00273784	Mt-cyb	mitochondrially encoded cytochrome b [Source:RGD Symbol;Acc:620081]
ENSRNOG00000003385	-0.887365	3.83998	0.000885062	0.00914351	Glrx2	glutaredoxin 2 [Source:RGD Symbol;Acc:1307950]
ENSRNOG00000010598	-0.885973	2.24316	0.000794434	0.00843823	Hs3st1	heparan sulfate-glucosamine 3-sulfotransferase 1 [Source:RGD Symbol;Acc:71084]
ENSRNOG00000002194	-0.88591	3.82112	0.000421673	0.00528884	Coq2	coenzyme Q2, polyprenyltransferase [Source:RGD Symbol;Acc:1306722]
ENSRNOG00000042503	-0.883991	7.86815	0.000800211	0.00848398	Ndufv2	NADH:ubiquinone oxidoreductase core subunit V2 [Source:RGD Symbol;Acc:621733]
ENSRNOG00000005016	-0.880128	4.3433	0.00079132	0.00841909	Tmed4	transmembrane p24 trafficking protein 4 [Source:RGD Symbol;Acc:1306319]
ENSRNOG00000033824	-0.877972	4.27279	0.000840644	0.00879797	Gpd2	glycerol-3-phosphate dehydrogenase 2 [Source:RGD Symbol;Acc:2726]
ENSRNOG00000009149	-0.871909	3.99053	0.000157423	0.00238477	Jam3	junctional adhesion molecule 3 [Source:RGD Symbol;Acc:1303248]
ENSRNOG00000060335	-0.867369	6.24539	0.000430311	0.00537617	Strn3	striatin 3 [Source:RGD Symbol;Acc:621827]
ENSRNOG00000000701	-0.863401	6.80427	0.000443739	0.00548362	Iscu	iron-sulfur cluster assembly enzyme [Source:RGD Symbol;Acc:1309562]
ENSRNOG00000021273	-0.862505	4.89151	0.000828213	0.00871764	Crls1	cardiolipin synthase 1 [Source:RGD Symbol;Acc:1311037]
ENSRNOG00000013589	-0.860915	5.91925	0.000870587	0.00901574	Cxcl12	C-X-C motif chemokine ligand 12 [Source:RGD Symbol;Acc:3651]
ENSRNOG00000001242	-0.859421	3.18448	0.000174387	0.00258378	Gstt3	glutathione S-transferase, theta 3 [Source:RGD Symbol;Acc:1562732]
ENSRNOG00000012874	-0.855939	4.83007	0.00064093	0.00725841	Rgma	repulsive guidance molecule family member A [Source:RGD Symbol;Acc:1311983]
ENSRNOG00000015233	-0.853527	6.28438	0.000599957	0.0069227	Etfa	electron transfer flavoprotein alpha subunit [Source:RGD Symbol;Acc:628747]
ENSRNOG00000056701	-0.851657	5.26972	0.000681007	0.00757193	Gtf2a2	general transcription factor2A subunit 2 [Source:RGD Symbol;Acc:620720]
ENSRNOG00000023473	-0.847801	4.22383	0.00024845	0.00345756	Rnf122	ring finger protein 122 [Source:RGD Symbol;Acc:1561238]
ENSRNOG00000030644	-0.843986	15.1754	0.00021897	0.00311141	Mt-nd1	mitochondrially encoded NADH dehydrogenase 1 [Source:RGD Symbol;Acc:620555]
ENSRNOG00000009892	-0.840732	5.15581	0.000755506	0.00812565	Adamts15	ADAM metallopeptidase with thrombospondin type 1 motif, 15 [Source:RGD Symbol;Acc:1309770]
ENSRNOG00000021158	-0.839938	3.08278	0.000355841	0.00462125	Nudt22	nudix hydrolase 22 [Source:RGD Symbol;Acc:735224]
ENSRNOG00000022999	-0.839715	4.85165	0.000901919	0.00926399	Ppp2r3a	protein phosphatase 2, regulatory subunit B'', alpha [Source:RGD Symbol;Acc:1306958]
ENSRNOG00000022234	-0.839472	5.35475	0.000850131	0.00886212	mrpl24	mitochondrial ribosomal protein L24 [Source:RGD Symbol;Acc:1359289]
ENSRNOG00000008079	-0.836407	7.35573	0.000388082	0.00493506	Ugp2	UDP-glucose pyrophosphorylase 2 [Source:RGD Symbol;Acc:1310210]
ENSRNOG00000018647	-0.820877	6.32638	0.000712537	0.00782084	Mrpl20	mitochondrial ribosomal protein L20 [Source:RGD Symbol;Acc:1588219]
ENSRNOG00000010805	-0.813657	8.3115	0.00073568	0.00799282	Fabp4	fatty acid binding protein 4 [Source:RGD Symbol;Acc:69309]
ENSRNOG00000045989	-0.811539	6.58548	0.000494695	0.0059825	Hba-a3	hemoglobin alpha, adult chain 3 [Source:RGD Symbol;Acc:1359209]
ENSRNOG00000001647	-0.80456	5.33387	0.000967688	0.00976132	Ets2	ETS proto-oncogene 2, transcription factor [Source:RGD Symbol;Acc:1584977]
ENSRNOG00000024410	-0.797718	5.49796	0.000531638	0.00632201	Blvrb	biliverdin reductase B [Source:RGD Symbol;Acc:1306080]
ENSRNOG00000008746	-0.791989	4.46507	0.000774368	0.00827304	Dtd1	D-tyrosyl-tRNA deacylase 1 [Source:RGD Symbol;Acc:1311821]
ENSRNOG00000007753	-0.788067	5.89189	0.000729508	0.00795269	Plaa	phospholipase A2, activating protein [Source:RGD Symbol;Acc:621245]
ENSRNOG00000037480	-0.779458	3.21523	0.000384434	0.00490325	Ddx51	DEAD-box helicase 51 [Source:RGD Symbol;Acc:1309580]
ENSRNOG00000004735	-0.769653	4.2503	0.00091767	0.00938217	Gzf1	GDNF-inducible zinc finger protein 1 [Source:RGD Symbol;Acc:1562321]
ENSRNOG00000053362	-0.757107	6.143	0.000890664	0.00918659	Gabarapl1	GABA type A receptor associated protein like 1 [Source:RGD Symbol;Acc:1596143]
ENSRNOG00000008510	-0.698185	1.86498	0.00045262	0.00557884	Abtb2	ankyrin repeat and BTB domain containing 2 [Source:RGD Symbol;Acc:620724]
ENSRNOG00000059662	-0.515651	0.365037	0.000463001	0.00567951	AABR07004228.1
ENSRNOG00000055745	-0.255283	-0.218234	0.000103429	0.00171681	AABR07043748.2
ENSRNOG00000009540	-0.0698511	-0.1989	0.000159784	0.00240921	Gpr3	G protein-coupled receptor 3 [Source:RGD Symbol;Acc:628686]

## Sheet: K_vs_S.up_in_S.GENES
EnsemblID	logFC	logCPM	PValue	FDR	GeneName	Description
ENSRNOG00000018982	7.6658	1.73586	3.65341e-07	4.34045e-05	Entpd3	ectonucleoside triphosphate diphosphohydrolase 3 [Source:RGD Symbol;Acc:631326]
ENSRNOG00000020981	7.24078	0.207224	3.85855e-12	2.15257e-09	Prss46	protease, serine, 46 [Source:RGD Symbol;Acc:1302970]
ENSRNOG00000024651	5.84557	-0.312773	4.32214e-05	0.00208486	Greb1	growth regulation by estrogen in breast cancer 1 [Source:RGD Symbol;Acc:1564091]
ENSRNOG00000031675	4.45407	2.46743	2.93072e-08	5.44986e-06	Panx3	pannexin 3 [Source:RGD Symbol;Acc:735137]
ENSRNOG00000002158	4.3383	8.10418	9.19719e-10	2.68479e-07	Ibsp	integrin-binding sialoprotein [Source:RGD Symbol;Acc:2855]
ENSRNOG00000014082	3.6993	1.93904	4.28358e-06	0.000325454	Sp7	Sp7 transcription factor [Source:RGD Symbol;Acc:631377]
ENSRNOG00000055745	3.61582	-0.218234	5.13558e-09	1.24329e-06	AABR07043748.2
ENSRNOG00000013474	3.48893	0.286384	4.09129e-05	0.00198846	Casz1	castor zinc finger 1 [Source:RGD Symbol;Acc:1563533]
ENSRNOG00000014870	3.46691	1.83948	1.15152e-06	0.000108868	Slc13a5	solute carrier family 13 member 5 [Source:RGD Symbol;Acc:631374]
ENSRNOG00000003304	3.17379	1.53809	4.82142e-05	0.0022744	Chad	chondroadherin [Source:RGD Symbol;Acc:2336]
ENSRNOG00000000552	3.15915	3.00017	3.48901e-06	0.000271318	Col13a1	collagen type XIII alpha 1 chain [Source:RGD Symbol;Acc:1595704]
ENSRNOG00000003694	3.04015	1.69347	1.66056e-11	7.54673e-09	Prox1	prospero homeobox 1 [Source:RGD Symbol;Acc:1306890]
ENSRNOG00000010478	2.96657	4.12804	3.75936e-07	4.34561e-05	LOC500712	Ab1-233 [Source:RGD Symbol;Acc:1562479]
ENSRNOG00000032002	2.94474	1.62338	5.4072e-05	0.00248673	Hapln1	hyaluronan and proteoglycan link protein 1 [Source:RGD Symbol;Acc:2412]
ENSRNOG00000019607	2.85467	6.55663	6.27926e-14	5.37128e-11	Bglap	bone gamma-carboxyglutamate protein [Source:RGD Symbol;Acc:2206]
ENSRNOG00000007765	2.80066	2.09115	1.53958e-05	0.000918807	Frzb	frizzled-related protein [Source:RGD Symbol;Acc:1311315]
ENSRNOG00000017959	2.75394	0.087974	4.624e-05	0.00218932	Cfap100	cilia and flagella associated protein 100 [Source:RGD Symbol;Acc:1305768]
ENSRNOG00000002167	2.7291	5.13812	7.55042e-10	2.30665e-07	Dmp1	dentin matrix acidic phosphoprotein 1 [Source:RGD Symbol;Acc:2508]
ENSRNOG00000031685	2.57949	8.93777	1.10769e-18	7.10638e-15	AY172581.12
ENSRNOG00000030462	2.5424	3.53344	7.87101e-12	4.20804e-09	Ostn	osteocrin [Source:RGD Symbol;Acc:1303110]
ENSRNOG00000042939	2.46919	0.072027	5.52084e-08	9.42316e-06	Nrip2	nuclear receptor interacting protein 2 [Source:RGD Symbol;Acc:1589959]
ENSRNOG00000002154	2.40321	2.94668	2.61498e-05	0.00139804	Mepe	matrix extracellular phosphoglycoprotein [Source:RGD Symbol;Acc:71036]
ENSRNOG00000051941	2.36462	1.10795	1.06308e-07	1.58609e-05	Fam78b	family with sequence similarity 78, member B [Source:MGI Symbol;Acc:MGI:2443050]
ENSRNOG00000017136	2.34995	0.555435	0.000315971	0.00998576	Syt17	synaptotagmin 17 [Source:RGD Symbol;Acc:708576]
ENSRNOG00000030759	2.31879	0.774762	2.61876e-06	0.000218191	Nhs	NHS actin remodeling regulator [Source:RGD Symbol;Acc:1561818]
ENSRNOG00000054493	2.30991	6.80329	4.82409e-09	1.21368e-06	Rmrp	RNA component of mitochondrial RNA processing endoribonuclease [Source:RGD Symbol;Acc:3580]
ENSRNOG00000016374	2.25825	4.48446	8.55368e-06	0.00058691	Fgfr2	fibroblast growth factor receptor 2 [Source:RGD Symbol;Acc:2611]
ENSRNOG00000000463	2.24256	5.06317	1.77744e-08	3.62004e-06	Col11a2	collagen type XI alpha 2 chain [Source:RGD Symbol;Acc:2373]
ENSRNOG00000010326	2.23651	1.11626	1.00291e-05	0.000663314	Col20a1	collagen type XX alpha 1 chain [Source:RGD Symbol;Acc:1563901]
ENSRNOG00000029370	2.23124	0.736114	7.48167e-06	0.000527458	Abhd3	abhydrolase domain containing 3 [Source:RGD Symbol;Acc:1310655]
ENSRNOG00000010188	2.18203	3.02269	0.000132491	0.00504447	Satb2	SATB homeobox 2 [Source:RGD Symbol;Acc:1562369]
ENSRNOG00000026087	2.17536	2.84594	1.68846e-06	0.000148387	Igfn1	immunoglobulin-like and fibronectin type III domain containing 1 [Source:RGD Symbol;Acc:1565384]
ENSRNOG00000047781	2.16659	0.634674	3.40978e-07	4.20681e-05	Slc25a23	solute carrier family 25 member 23 [Source:RGD Symbol;Acc:1588586]
ENSRNOG00000008034	2.13987	1.28289	0.000131177	0.00503933	Tmeff1	transmembrane protein with EGF-like and two follistatin-like domains 1 [Source:RGD Symbol;Acc:62005]
ENSRNOG00000006857	2.11384	2.73231	8.63381e-07	8.75972e-05	Ndnf	neuron-derived neurotrophic factor [Source:RGD Symbol;Acc:1311080]
ENSRNOG00000007637	2.07896	2.2039	6.41718e-10	2.00827e-07	Acer2	alkaline ceramidase 2 [Source:RGD Symbol;Acc:1304629]
ENSRNOG00000034134	2.06585	4.15817	5.70207e-07	6.04655e-05	Cpm	carboxypeptidase M [Source:RGD Symbol;Acc:1310532]
ENSRNOG00000015071	2.05862	1.26869	2.40215e-05	0.00131718	Zim1	zinc finger, imprinted 1 [Source:RGD Symbol;Acc:1310930]
ENSRNOG00000046377	2.04163	0.824318	6.24145e-09	1.48304e-06	Btnl9	butyrophilin-like 9 [Source:RGD Symbol;Acc:1590287]
ENSRNOG00000016971	2.00855	0.818298	7.72139e-05	0.00336984	Zfp612	zinc finger protein 612 [Source:RGD Symbol;Acc:1307197]
ENSRNOG00000028108	1.99159	1.32336	0.000138365	0.00522417	Cytl1	cytokine like 1 [Source:RGD Symbol;Acc:1561846]
ENSRNOG00000052421	1.96911	0.253081	0.000141819	0.00532068	AABR07012475.2
ENSRNOG00000018381	1.8992	1.7774	7.94928e-08	1.21735e-05	Cdkal1	CDK5 regulatory subunit associated protein 1-like 1 [Source:RGD Symbol;Acc:1310246]
ENSRNOG00000027694	1.89148	4.9394	1.91731e-11	7.93579e-09	Rn60_5_1691.1
ENSRNOG00000026592	1.88049	1.86649	1.62873e-05	0.000954256	Rhbdl2	rhomboid like 2 [Source:RGD Symbol;Acc:1308295]
ENSRNOG00000053862	1.84511	1.99643	1.16242e-06	0.000108868	AABR07070635.1
ENSRNOG00000005964	1.84393	1.28646	0.000169728	0.0059994	Nr4a3	nuclear receptor subfamily 4, group A, member 3 [Source:RGD Symbol;Acc:61882]
ENSRNOG00000061441	1.84302	1.82796	3.01072e-05	0.00155143	AABR07071935.1
ENSRNOG00000010905	1.833	3.29232	1.77423e-06	0.000153818	Dlx5	distal-less homeobox 5 [Source:RGD Symbol;Acc:2506]
ENSRNOG00000008949	1.82848	3.84882	2.13067e-05	0.00120435	Synpo2l	synaptopodin 2-like [Source:RGD Symbol;Acc:1565434]
ENSRNOG00000018426	1.81522	2.12429	0.000301428	0.00962094	Apoc1	apolipoprotein C1 [Source:RGD Symbol;Acc:2134]
ENSRNOG00000009222	1.8065	2.52001	8.6104e-06	0.00058766	Epha2	Eph receptor A2 [Source:RGD Symbol;Acc:1307204]
ENSRNOG00000015821	1.80177	1.71168	8.89499e-05	0.00369358	Cd2	Cd2 molecule [Source:RGD Symbol;Acc:2297]
ENSRNOG00000005299	1.78362	1.69926	8.52213e-05	0.00363281	Kif5a	kinesin family member 5A [Source:RGD Symbol;Acc:1303035]
ENSRNOG00000000414	1.75944	0.972091	3.9209e-07	4.45213e-05	Cep85l	centrosomal protein 85-like [Source:RGD Symbol;Acc:2319745]
ENSRNOG00000002511	1.74304	2.83107	0.000126562	0.00492096	Flt4	fms-related tyrosine kinase 4 [Source:RGD Symbol;Acc:621737]
ENSRNOG00000018797	1.67749	0.89021	8.61791e-05	0.00364938	Myrip	myosin VIIA and Rab interacting protein [Source:RGD Symbol;Acc:727731]
ENSRNOG00000026518	1.66451	0.360678	0.000173821	0.0061104	Tmem156	transmembrane protein 156 [Source:RGD Symbol;Acc:1562424]
ENSRNOG00000048213	1.64769	1.61034	3.63013e-07	4.34045e-05	Rn50_X_0744.1
ENSRNOG00000015049	1.62259	2.95445	0.00023691	0.00799878	Scn5a	sodium voltage-gated channel alpha subunit 5 [Source:RGD Symbol;Acc:3637]
ENSRNOG00000027742	1.61864	2.45426	9.88661e-07	9.53798e-05	Adamtsl2	ADAMTS-like 2 [Source:RGD Symbol;Acc:1305459]
ENSRNOG00000062101	1.61278	2.50148	3.45661e-05	0.00171242	Ace	angiotensin I converting enzyme [Source:RGD Symbol;Acc:2493]
ENSRNOG00000014265	1.6111	2.64294	4.43944e-05	0.00212546	Tnfrsf19	TNF receptor superfamily member 19 [Source:RGD Symbol;Acc:1564996]
ENSRNOG00000006978	1.60711	1.91234	2.48789e-05	0.00135263	Mterf2	mitochondrial transcription termination factor 2 [Source:RGD Symbol;Acc:1311836]
ENSRNOG00000019365	1.5954	3.59346	2.57433e-05	0.00138206	Ablim3	actin binding LIM protein family, member 3 [Source:RGD Symbol;Acc:1565118]
ENSRNOG00000017539	1.5941	8.15309	9.46389e-06	0.000639112	Mmp9	matrix metallopeptidase 9 [Source:RGD Symbol;Acc:621320]
ENSRNOG00000023465	1.592	3.45669	3.32461e-05	0.00167945	LOC500300	similar to hypothetical protein MGC6835 [Source:RGD Symbol;Acc:1565700]
ENSRNOG00000046261	1.57094	8.46744	1.61739e-05	0.000951962	Acp5	acid phosphatase 5, tartrate resistant [Source:RGD Symbol;Acc:2022]
ENSRNOG00000012422	1.56746	1.22052	8.73856e-07	8.75972e-05	Tnik	TRAF2 and NCK interacting kinase [Source:RGD Symbol;Acc:1561817]
ENSRNOG00000029956	1.5547	1.5579	0.000282345	0.00921823	Zfp654	zinc finger protein 654 [Source:RGD Symbol;Acc:1308321]
ENSRNOG00000052373	1.55049	1.58512	1.59028e-05	0.000940317	Vault	Vault RNA [Source:RFAM;Acc:RF00006]
ENSRNOG00000050964	1.54623	0.763737	7.92083e-06	0.000552349	LOC100911068	roundabout homolog 4-like [Source:RGD Symbol;Acc:6494870]
ENSRNOG00000038746	1.54492	2.48577	2.85555e-05	0.00148338	Tex12	testis expressed 12 [Source:RGD Symbol;Acc:1597300]
ENSRNOG00000009074	1.5421	2.05527	3.40061e-05	0.00169121	AABR07017902.1
ENSRNOG00000024998	1.5306	2.3106	2.83899e-06	0.000233507	Trps1	transcriptional repressor GATA binding 1 [Source:RGD Symbol;Acc:1311883]
ENSRNOG00000030285	1.4976	4.6493	6.14738e-07	6.46533e-05	Epha3	Eph receptor A3 [Source:RGD Symbol;Acc:68389]
ENSRNOG00000014168	1.48882	4.41342	1.89079e-08	3.73537e-06	Xylb	xylulokinase [Source:RGD Symbol;Acc:1307372]
ENSRNOG00000003840	1.44969	4.53126	1.4813e-05	0.000892325	Slit2	slit guidance ligand 2 [Source:RGD Symbol;Acc:69310]
ENSRNOG00000002451	1.42806	2.44322	0.000261703	0.00863241	Fndc3c1	fibronectin type III domain containing 3C1 [Source:RGD Symbol;Acc:1563846]
ENSRNOG00000002487	1.42117	-0.276546	3.29747e-05	0.00167233	Mbnl3	muscleblind-like splicing regulator 3 [Source:RGD Symbol;Acc:1565834]
ENSRNOG00000052080	1.40475	4.74943	2.31974e-05	0.00128851	Camk2b	calcium/calmodulin-dependent protein kinase II beta [Source:RGD Symbol;Acc:2262]
ENSRNOG00000011696	1.3997	1.89321	0.000290002	0.00935259	Lifr	leukemia inhibitory factor receptor alpha [Source:RGD Symbol;Acc:621431]
ENSRNOG00000022249	1.39784	2.57325	0.00018003	0.00631138	Mllt10	myeloid/lymphoid or mixed-lineage leukemia; translocated to, 10 [Source:RGD Symbol;Acc:1310874]
ENSRNOG00000032825	1.39707	5.82929	9.65215e-07	9.40224e-05	Rpl30	ribosomal protein L30 [Source:RGD Symbol;Acc:621201]
ENSRNOG00000014019	1.37952	1.88314	2.55519e-06	0.000214487	Tbc1d7	TBC1 domain family, member 7 [Source:RGD Symbol;Acc:1307661]
ENSRNOG00000020563	1.36126	3.33953	1.49043e-05	0.000893632	Cma1	chymase 1 [Source:RGD Symbol;Acc:2365]
ENSRNOG00000061379	1.3555	4.20908	5.08704e-05	0.00238218	C7	complement C7 [Source:RGD Symbol;Acc:620318]
ENSRNOG00000005608	1.35058	4.2405	1.02633e-05	0.000675328	Tead4	TEA domain transcription factor 4 [Source:RGD Symbol;Acc:1585671]
ENSRNOG00000021334	1.34821	0.162939	5.74047e-05	0.00262121	Lag3	lymphocyte activating 3 [Source:RGD Symbol;Acc:1302990]
ENSRNOG00000042201	1.34009	0.964248	0.000165606	0.00591891	Efcab2	EF-hand calcium binding domain 2 [Source:RGD Symbol;Acc:1308593]
ENSRNOG00000002208	1.3378	1.57602	2.54987e-05	0.00137826	Shroom3	shroom family member 3 [Source:RGD Symbol;Acc:1310470]
ENSRNOG00000019022	1.33191	0.744917	1.19671e-05	0.000760145	Fam89a	family with sequence similarity 89, member A [Source:RGD Symbol;Acc:1309879]
ENSRNOG00000053272	1.32769	3.38863	0.000106443	0.00425472	Chi3l1	chitinase 3 like 1 [Source:RGD Symbol;Acc:620874]
ENSRNOG00000008478	1.3261	8.62223	3.72987e-07	4.34561e-05	Mmp13	matrix metallopeptidase 13 [Source:RGD Symbol;Acc:620196]
ENSRNOG00000055293	1.30482	3.08926	0.000150883	0.00559531	Ptprb	protein tyrosine phosphatase, receptor type, B [Source:RGD Symbol;Acc:1305922]
ENSRNOG00000032274	1.29505	2.26066	1.13205e-05	0.000729915	AY172581.15
ENSRNOG00000032414	1.28973	0.315663	0.000260545	0.00863241	Tmem161b	transmembrane protein 161B [Source:RGD Symbol;Acc:1309660]
ENSRNOG00000011809	1.28249	0.206004	0.000182867	0.00637601	Rpgrip1	retinitis pigmentosa GTPase regulator interacting protein 1 [Source:RGD Symbol;Acc:1310807]
ENSRNOG00000027434	1.2815	4.65076	4.71604e-06	0.000349778	Fitm2	fat storage-inducing transmembrane protein 2 [Source:RGD Symbol;Acc:1307696]
ENSRNOG00000049856	1.27082	1.40974	7.71523e-05	0.00336984	Zfp617	zinc finger protein 617 [Source:RGD Symbol;Acc:2319713]
ENSRNOG00000005271	1.26851	3.10263	5.19038e-05	0.00242174	Rapgef5	Rap guanine nucleotide exchange factor 5 [Source:RGD Symbol;Acc:1561668]
ENSRNOG00000005574	1.25346	1.84405	3.48014e-06	0.000271318	Adamts8	ADAM metallopeptidase with thrombospondin type 1 motif, 8 [Source:RGD Symbol;Acc:1308511]
ENSRNOG00000016494	1.24971	3.37662	0.0001692	0.00599726	Tmem204	transmembrane protein 204 [Source:RGD Symbol;Acc:1359314]
ENSRNOG00000045961	1.24627	3.28834	2.55651e-05	0.00137826	Lyrm7	LYR motif containing 7 [Source:RGD Symbol;Acc:1596391]
ENSRNOG00000014197	1.2383	2.66706	2.78182e-05	0.00146285	Tmem51	transmembrane protein 51 [Source:RGD Symbol;Acc:1565452]
ENSRNOG00000005042	1.21943	1.27003	0.000237514	0.00799878	Ranbp17	RAN binding protein 17 [Source:RGD Symbol;Acc:1562576]
ENSRNOG00000029399	1.17139	4.37519	1.39447e-05	0.000856096	Bcam	basal cell adhesion molecule (Lutheran blood group) [Source:RGD Symbol;Acc:68378]
ENSRNOG00000002876	1.16937	1.86026	1.17263e-05	0.000748559	Eef2kmt	eukaryotic elongation factor 2 lysine methyltransferase [Source:RGD Symbol;Acc:1304969]
ENSRNOG00000003687	1.15686	4.5437	1.38571e-05	0.00085481	Rgs2	regulator of G-protein signaling 2 [Source:RGD Symbol;Acc:621665]
ENSRNOG00000020093	1.14676	3.68015	1.85074e-05	0.00107452	LOC100360573	ribosomal protein S12-like [Source:RGD Symbol;Acc:2321884]
ENSRNOG00000028323	1.14513	4.28969	0.000315328	0.00998576	Dhrsx	dehydrogenase/reductase X-linked [Source:RGD Symbol;Acc:1305017]
ENSRNOG00000038868	1.14506	2.84214	0.000129028	0.00498664	Iqcb1	IQ motif containing B1 [Source:RGD Symbol;Acc:1310069]
ENSRNOG00000011300	1.14028	2.0755	0.000269077	0.00882998	Lama3	laminin subunit alpha 3 [Source:RGD Symbol;Acc:628776]
ENSRNOG00000025143	1.12857	3.75354	2.84837e-05	0.00148338	Icam2	intercellular adhesion molecule 2 [Source:RGD Symbol;Acc:1359660]
ENSRNOG00000042848	1.12548	5.03394	2.09494e-05	0.00118939	Jam2	junctional adhesion molecule 2 [Source:RGD Symbol;Acc:1561692]
ENSRNOG00000001544	1.11106	3.66755	6.42932e-05	0.00289455	Cyyr1	cysteine and tyrosine rich 1 [Source:RGD Symbol;Acc:1359578]
ENSRNOG00000057527	1.10921	5.15443	0.000287436	0.00933692	RNase_MRP	RNase MRP [Source:RFAM;Acc:RF00030]
ENSRNOG00000050000	1.10531	2.12828	0.000296474	0.00953399	LOC100361706	lambda-chain C1-region-like [Source:RGD Symbol;Acc:2319568]
ENSRNOG00000024780	1.09824	2.55979	0.000195308	0.00673656	MGC95210	hypothetical LOC287798 [Source:RGD Symbol;Acc:1359207]
ENSRNOG00000019667	1.08856	4.23189	8.85687e-05	0.00369358	Ppfibp2	PPFIA binding protein 2 [Source:RGD Symbol;Acc:1565383]
ENSRNOG00000012488	1.07247	3.69099	3.36032e-06	0.00026615	Rab2b	RAB2B, member RAS oncogene family [Source:RGD Symbol;Acc:1309117]
ENSRNOG00000021237	1.06673	2.10461	0.000166738	0.00594282	RGD1565616	RGD1565616 [Source:RGD Symbol;Acc:1565616]
ENSRNOG00000029662	1.0551	3.60366	0.000224936	0.00767593	Wdfy4	WDFY family member 4 [Source:RGD Symbol;Acc:1564142]
ENSRNOG00000009149	1.02572	3.99053	5.61311e-05	0.00257221	Jam3	junctional adhesion molecule 3 [Source:RGD Symbol;Acc:1303248]
ENSRNOG00000014791	1.02026	6.89416	8.26876e-05	0.00353655	Peg3	paternally expressed 3 [Source:RGD Symbol;Acc:2323590]
ENSRNOG00000036913	0.983644	5.04362	0.000159473	0.00576393	RGD1309621	similar to hypothetical protein FLJ10652 [Source:RGD Symbol;Acc:1309621]
ENSRNOG00000037480	0.972211	3.21523	0.000122256	0.0048264	Ddx51	DEAD-box helicase 51 [Source:RGD Symbol;Acc:1309580]
ENSRNOG00000014259	0.972067	2.46222	0.000135452	0.00514197	Mycl	v-myc avian myelocytomatosis viral oncogene lung carcinoma derived homolog [Source:RGD Symbol;Acc:1588591]
ENSRNOG00000032803	0.970784	4.03204	0.000153855	0.00564623	Rpl21	ribosomal protein L21 [Source:RGD Symbol;Acc:68390]
ENSRNOG00000029134	0.960758	3.49329	0.000298411	0.00954842	Adgrl1	adhesion G protein-coupled receptor L1 [Source:RGD Symbol;Acc:620768]
ENSRNOG00000017500	0.949227	4.37362	0.000125496	0.00489433	Mtss1l	MTSS1L, I-BAR domain containing [Source:RGD Symbol;Acc:1309731]
ENSRNOG00000031052	0.933002	4.8489	0.000288312	0.00934176	LOC100362751	ribosomal protein P2-like [Source:RGD Symbol;Acc:2324107]
ENSRNOG00000004730	0.931821	3.11881	0.000165297	0.00591891	Meis2	Meis homeobox 2 [Source:RGD Symbol;Acc:1305198]
ENSRNOG00000004693	0.892112	3.09656	0.000113686	0.00453012	Pbx1	PBX homeobox 1 [Source:RGD Symbol;Acc:1308213]
ENSRNOG00000020309	0.88476	0.519164	6.66702e-05	0.0029703	Gfra3	GDNF family receptor alpha 3 [Source:RGD Symbol;Acc:620502]
ENSRNOG00000027447	0.861579	3.35464	0.00025803	0.00857716	Stam2	signal transducing adaptor molecule 2 [Source:RGD Symbol;Acc:1311497]

## Sheet: K_vs_S.down_in_S.GENES
EnsemblID	logFC	logCPM	PValue	FDR	GeneName	Description
ENSRNOG00000023508	-5.38911	-0.504989	1.52448e-06	0.000137751	Mfsd2b	major facilitator superfamily domain containing 2B [Source:RGD Symbol;Acc:1561716]
ENSRNOG00000028114	-4.5085	2.3992	1.39662e-13	1.12e-10	Hbq1b	hemoglobin, theta 1B [Source:RGD Symbol;Acc:2320907]
ENSRNOG00000051128	-3.7082	0.447959	3.54341e-07	4.32397e-05	Rn50_1_1855.1
ENSRNOG00000032374	-3.69411	1.22527	3.62533e-11	1.4096e-08	Paqr9	progestin and adipoQ receptor family member 9 [Source:RGD Symbol;Acc:1311515]
ENSRNOG00000008356	-3.68827	3.37612	1.8157e-16	3.88287e-13	Myo5c	myosin VC [Source:RGD Symbol;Acc:1309994]
ENSRNOG00000008656	-3.67036	2.37189	1.97283e-05	0.00113006	Snca	synuclein alpha [Source:RGD Symbol;Acc:3729]
ENSRNOG00000017130	-3.62808	4.60871	1.99763e-26	2.56316e-22	Rhd	Rh blood group, D antigen [Source:RGD Symbol;Acc:620451]
ENSRNOG00000022298	-3.60037	1.54808	2.79207e-16	4.47813e-13	Cxcl11	C-X-C motif chemokine ligand 11 [Source:RGD Symbol;Acc:727827]
ENSRNOG00000011353	-3.58716	1.82237	2.16458e-16	3.96768e-13	Gfi1b	growth factor independent 1B transcriptional repressor [Source:RGD Symbol;Acc:1311727]
ENSRNOG00000011649	-3.55813	4.60687	7.95447e-13	5.10319e-10	Epb42	erythrocyte membrane protein band 4.2 [Source:RGD Symbol;Acc:1305306]
ENSRNOG00000010698	-3.54273	5.97682	5.59305e-17	1.43529e-13	Car1	carbonic anhydrase I [Source:RGD Symbol;Acc:1309780]
ENSRNOG00000009797	-3.49559	0.941457	2.09481e-10	7.26475e-08	Aqp3	aquaporin 3 [Source:RGD Symbol;Acc:68428]
ENSRNOG00000020420	-3.34718	0.784336	2.65016e-08	5.00061e-06	Pklr	pyruvate kinase, liver and RBC [Source:RGD Symbol;Acc:3336]
ENSRNOG00000050121	-3.31992	3.53667	4.09154e-11	1.54407e-08	Rhag	Rh-associated glycoprotein [Source:RGD Symbol;Acc:61871]
ENSRNOG00000015682	-3.31692	4.31013	1.59102e-13	1.20084e-10	Kel	Kell blood group, metallo-endopeptidase [Source:RGD Symbol;Acc:1565470]
ENSRNOG00000006911	-3.27793	5.54533	1.75512e-17	5.62998e-14	Sptb	spectrin, beta, erythrocytic [Source:RGD Symbol;Acc:1303243]
ENSRNOG00000015903	-3.18009	4.94343	4.73975e-08	8.33093e-06	Add2	adducin 2 [Source:RGD Symbol;Acc:2042]
ENSRNOG00000003443	-3.08546	4.0733	2.09489e-10	7.26475e-08	Klf1	Kruppel like factor 1 [Source:RGD Symbol;Acc:1309398]
ENSRNOG00000021802	-3.0562	4.11217	1.55934e-17	5.62998e-14	Isg15	ISG15 ubiquitin-like modifier [Source:RGD Symbol;Acc:1310312]
ENSRNOG00000003537	-2.97324	5.40128	1.19633e-09	3.26599e-07	Spta1	spectrin, alpha, erythrocytic 1 [Source:RGD Symbol;Acc:1305194]
ENSRNOG00000040201	-2.96665	0.594918	8.78441e-05	0.00369358	Atp6ap1l	ATPase H+ transporting accessory protein 1 like [Source:RGD Symbol;Acc:1564936]
ENSRNOG00000027767	-2.95843	2.09183	1.45988e-14	1.4409e-11	Slc38a5	solute carrier family 38, member 5 [Source:RGD Symbol;Acc:620702]
ENSRNOG00000038720	-2.83107	1.84813	2.73576e-05	0.00144455	Cdkl1	cyclin dependent kinase like 1 [Source:RGD Symbol;Acc:1305080]
ENSRNOG00000021555	-2.82909	3.30727	4.55202e-05	0.00216322	Mis18a	MIS18 kinetochore protein A [Source:RGD Symbol;Acc:1310778]
ENSRNOG00000005670	-2.78866	1.07479	1.29283e-10	4.73953e-08	Art4	ADP-ribosyltransferase 4 [Source:RGD Symbol;Acc:1306456]
ENSRNOG00000009332	-2.73572	0.705103	1.50803e-07	2.05846e-05	Rec114	REC114 meiotic recombination protein [Source:RGD Symbol;Acc:1311874]
ENSRNOG00000001963	-2.72696	4.40439	1.25117e-11	6.17452e-09	Mx2	MX dynamin like GTPase 2 [Source:RGD Symbol;Acc:628821]
ENSRNOG00000000335	-2.72343	2.09477	4.06334e-05	0.00198239	Ermap	erythroblast membrane-associated protein [Source:RGD Symbol;Acc:1309996]
ENSRNOG00000015403	-2.68134	3.97751	3.37633e-05	0.00168822	Cd52	CD52 molecule [Source:RGD Symbol;Acc:620627]
ENSRNOG00000046151	-2.6738	-0.417415	0.000122625	0.0048264	Tubb1	tubulin, beta 1 class VI [Source:RGD Symbol;Acc:1589557]
ENSRNOG00000020165	-2.66172	7.00549	1.74392e-11	7.54673e-09	Ahsp	alpha hemoglobin stabilizing protein [Source:RGD Symbol;Acc:1306725]
ENSRNOG00000025051	-2.65346	4.60921	1.13931e-14	1.32895e-11	Tal1	TAL bHLH transcription factor 1, erythroid differentiation factor [Source:RGD Symbol;Acc:1306748]
ENSRNOG00000012619	-2.64243	1.66711	2.00837e-12	1.17134e-09	Epor	erythropoietin receptor [Source:RGD Symbol;Acc:2560]
ENSRNOG00000051337	-2.62947	-0.624709	1.74831e-05	0.00101966	Rn50_13_0873.1
ENSRNOG00000004870	-2.61765	2.37281	1.92139e-08	3.73537e-06	Dyrk3	dual specificity tyrosine phosphorylation regulated kinase 3 [Source:RGD Symbol;Acc:1310924]
ENSRNOG00000001369	-2.60247	2.01183	4.9151e-10	1.57664e-07	Oas1a	2'-5' oligoadenylate synthetase 1A [Source:RGD Symbol;Acc:621760]
ENSRNOG00000020951	-2.57071	8.40001	2.4962e-10	8.42862e-08	Slc4a1	solute carrier family 4 member 1 [Source:RGD Symbol;Acc:3710]
ENSRNOG00000013330	-2.56436	3.86916	1.48669e-12	9.08366e-10	Cdhr1	cadherin-related family member 1 [Source:RGD Symbol;Acc:620420]
ENSRNOG00000019577	-2.5586	0.955577	6.94885e-08	1.10075e-05	Adamts19	ADAM metallopeptidase with thrombospondin type 1 motif, 19 [Source:RGD Symbol;Acc:1308359]
ENSRNOG00000010037	-2.55272	5.16296	3.83458e-14	3.51439e-11	Epb41	erythrocyte membrane protein band 4.1 [Source:RGD Symbol;Acc:1564762]
ENSRNOG00000057092	-2.54447	7.48372	6.84004e-13	4.61919e-10	Slfn4	schlafen 4 [Source:RGD Symbol;Acc:620455]
ENSRNOG00000016753	-2.53115	1.58914	1.51581e-08	3.18842e-06	Slc14a1	solute carrier family 14 member 1 [Source:RGD Symbol;Acc:3688]
ENSRNOG00000001959	-2.49116	5.06882	1.10744e-07	1.63328e-05	Mx1	myxovirus (influenza virus) resistance 1 [Source:RGD Symbol;Acc:3127]
ENSRNOG00000038625	-2.48519	0.647404	5.11237e-08	8.86443e-06	Sbk2	SH3 domain binding kinase family, member 2 [Source:RGD Symbol;Acc:1563279]
ENSRNOG00000018316	-2.48125	1.86781	0.000143227	0.00535785	Grap2	GRB2-related adaptor protein 2 [Source:MGI Symbol;Acc:MGI:1333842]
ENSRNOG00000015222	-2.45472	4.40323	2.07673e-05	0.00118429	Fam46c	family with sequence similarity 46, member C [Source:RGD Symbol;Acc:1359446]
ENSRNOG00000036837	-2.42762	3.94374	4.99978e-06	0.000364501	Nfe2	nuclear factor, erythroid 2 [Source:RGD Symbol;Acc:1306888]
ENSRNOG00000007539	-2.41455	7.00291	4.26173e-07	4.75498e-05	Rsad2	radical S-adenosyl methionine domain containing 2 [Source:RGD Symbol;Acc:620495]
ENSRNOG00000002397	-2.40944	0.00843502	4.28663e-06	0.000325454	Slc30a10	solute carrier family 30, member 10 [Source:RGD Symbol;Acc:1305098]
ENSRNOG00000022839	-2.38777	3.54402	2.42449e-05	0.00132377	Ifit3	interferon-induced protein with tetratricopeptide repeats 3 [Source:RGD Symbol;Acc:1359681]
ENSRNOG00000012878	-2.38647	0.133193	2.80922e-05	0.00147123	Atp7b	ATPase copper transporting beta [Source:RGD Symbol;Acc:2180]
ENSRNOG00000012273	-2.38113	3.50241	2.95227e-13	2.10448e-10	Dmtn	dematin actin binding protein [Source:RGD Symbol;Acc:1311419]
ENSRNOG00000027799	-2.36648	1.559	8.83932e-05	0.00369358	Tmie	transmembrane inner ear [Source:RGD Symbol;Acc:1562523]
ENSRNOG00000022256	-2.35744	3.89554	1.24798e-06	0.000114378	Cxcl10	C-X-C motif chemokine ligand 10 [Source:RGD Symbol;Acc:620209]
ENSRNOG00000007690	-2.3524	3.8062	4.24278e-08	7.56098e-06	Cmpk2	cytidine/uridine monophosphate kinase 2 [Source:RGD Symbol;Acc:1305881]
ENSRNOG00000024594	-2.33292	3.22228	8.19984e-15	1.05212e-11	Fhdc1	FH2 domain containing 1 [Source:RGD Symbol;Acc:1311955]
ENSRNOG00000019484	-2.31071	3.05291	1.38572e-14	1.4409e-11	Slc6a9	solute carrier family 6 member 9 [Source:RGD Symbol;Acc:621243]
ENSRNOG00000001407	-2.3008	0.611998	6.78076e-08	1.08755e-05	Tfr2	transferrin receptor 2 [Source:RGD Symbol;Acc:1310152]
ENSRNOG00000033220	-2.27703	2.58901	1.50065e-11	7.13141e-09	Oas1b	2-5 oligoadenylate synthetase 1B [Source:RGD Symbol;Acc:708393]
ENSRNOG00000000588	-2.27559	2.29661	2.16361e-09	5.7836e-07	Slc16a10	solute carrier family 16 member 10 [Source:RGD Symbol;Acc:69197]
ENSRNOG00000039571	-2.27347	0.757716	4.00433e-07	4.50698e-05	Glod5	glyoxalase domain containing 5 [Source:RGD Symbol;Acc:1564596]
ENSRNOG00000051850	-2.26929	0.108079	2.2218e-05	0.00124489	SCARNA2	Small Cajal body-specific RNA 2 [Source:RFAM;Acc:RF01268]
ENSRNOG00000043419	-2.26892	0.707159	4.58045e-07	5.06653e-05	Hist3h2ba	histone cluster 3, H2ba [Source:RGD Symbol;Acc:1307520]
ENSRNOG00000013034	-2.2664	2.22481	7.54873e-08	1.18119e-05	Dupd1	dual specificity phosphatase and pro isomerase domain containing 1 [Source:RGD Symbol;Acc:1310229]
ENSRNOG00000027891	-2.24427	3.85961	6.0438e-15	8.61644e-12	Dhrs11	dehydrogenase/reductase 11 [Source:RGD Symbol;Acc:1307935]
ENSRNOG00000010098	-2.23996	0.26043	4.88651e-06	0.000358761	Plek2	pleckstrin 2 [Source:RGD Symbol;Acc:1305786]
ENSRNOG00000033056	-2.20034	0.191614	3.76974e-05	0.00185324	LOC691422	similar to zinc finger protein 101 [Source:RGD Symbol;Acc:1583951]
ENSRNOG00000012811	-2.18408	1.6236	1.12706e-08	2.49334e-06	Spint1	serine peptidase inhibitor, Kunitz type 1 [Source:RGD Symbol;Acc:1303138]
ENSRNOG00000009436	-2.18398	5.75682	3.04626e-06	0.000245828	Hemgn	hemogen [Source:RGD Symbol;Acc:621569]
ENSRNOG00000007900	-2.18216	2.53883	2.32563e-11	9.32504e-09	Tspan33	tetraspanin 33 [Source:RGD Symbol;Acc:1560915]
ENSRNOG00000019183	-2.12869	6.7583	1.35974e-05	0.000842844	Alox15	arachidonate 15-lipoxygenase [Source:RGD Symbol;Acc:70493]
ENSRNOG00000011007	-2.09257	5.77688	3.19979e-05	0.00164226	Ube2o	ubiquitin-conjugating enzyme E2O [Source:RGD Symbol;Acc:1310297]
ENSRNOG00000009629	-2.03148	7.6829	1.01329e-09	2.82641e-07	Car2	carbonic anhydrase 2 [Source:RGD Symbol;Acc:2240]
ENSRNOG00000002139	-2.01479	1.50456	2.04194e-07	2.70105e-05	RGD1311575	hypothetical LOC289568 [Source:RGD Symbol;Acc:1311575]
ENSRNOG00000008450	-2.00616	1.89312	4.94557e-07	5.42365e-05	LOC100359539	ribonucleotide reductase M2 polypeptide [Source:RGD Symbol;Acc:2323655]
ENSRNOG00000057335	-2.00284	2.09269	6.4464e-06	0.000462088	Clec1b	C-type lectin domain family 1, member B [Source:RGD Symbol;Acc:1563517]
ENSRNOG00000008841	-1.99998	1.15124	0.000203557	0.00698352	Orc1	origin recognition complex, subunit 1 [Source:RGD Symbol;Acc:631435]
ENSRNOG00000009280	-1.97098	6.44333	1.96681e-07	2.62876e-05	Mkrn1	makorin ring finger protein 1 [Source:RGD Symbol;Acc:1303251]
ENSRNOG00000061299	-1.95595	8.82413	1.24883e-05	0.000785476	LOC103694857	hemoglobin subunit beta-2 [Source:RGD Symbol;Acc:9218369]
ENSRNOG00000031851	-1.94787	3.85098	9.20667e-10	2.68479e-07	Ndufa4l2	NDUFA4, mitochondrial complex associated like 2 [Source:RGD Symbol;Acc:2324558]
ENSRNOG00000006314	-1.94226	2.05715	3.72562e-09	9.56069e-07	Zbp1	Z-DNA binding protein 1 [Source:RGD Symbol;Acc:619956]
ENSRNOG00000004466	-1.9244	2.98153	1.49654e-07	2.05846e-05	Fam210b	family with sequence similarity 210, member B [Source:RGD Symbol;Acc:1311378]
ENSRNOG00000014343	-1.92399	1.90653	5.44334e-07	5.8203e-05	Anln	anillin, actin binding protein [Source:RGD Symbol;Acc:1561367]
ENSRNOG00000021663	-1.89767	1.18264	1.33452e-06	0.000121441	RGD1561849	similar to RIKEN cDNA 3110035E14 [Source:RGD Symbol;Acc:1561849]
ENSRNOG00000009434	-1.88976	2.11433	2.75761e-06	0.000228277	RGD1310507	similar to RIKEN cDNA 1300017J02 [Source:RGD Symbol;Acc:1310507]
ENSRNOG00000047741	-1.88848	5.37996	2.68355e-07	3.34298e-05	E2f2	E2F transcription factor 2 [Source:RGD Symbol;Acc:1593939]
ENSRNOG00000012892	-1.86559	1.86261	0.00012504	0.00489144	Abca4	ATP binding cassette subfamily A member 4 [Source:RGD Symbol;Acc:1309445]
ENSRNOG00000017414	-1.85447	6.30226	5.37576e-07	5.79634e-05	Irf7	interferon regulatory factor 7 [Source:RGD Symbol;Acc:1307828]
ENSRNOG00000038132	-1.83829	1.61845	0.000192479	0.00665686	Vsig4	V-set and immunoglobulin domain containing 4 [Source:RGD Symbol;Acc:1564659]
ENSRNOG00000007805	-1.83465	4.34923	2.59252e-08	4.96487e-06	Mybl2	myeloblastosis oncogene-like 2 [Source:RGD Symbol;Acc:1308474]
ENSRNOG00000013167	-1.83231	5.10322	8.53751e-08	1.28876e-05	Hmgb2l1	high mobility group box 2-like 1 [Source:RGD Symbol;Acc:1564519]
ENSRNOG00000043039	-1.80517	1.46178	4.50133e-06	0.000337758	LOC691162	hypothetical protein LOC691162 [Source:RGD Symbol;Acc:1587426]
ENSRNOG00000019445	-1.80182	4.99615	9.55534e-12	4.90418e-09	Msln	mesothelin [Source:RGD Symbol;Acc:69333]
ENSRNOG00000003802	-1.79756	4.57253	1.31472e-08	2.81153e-06	Pttg1	pituitary tumor-transforming 1 [Source:RGD Symbol;Acc:68359]
ENSRNOG00000027787	-1.78927	2.88004	1.15608e-07	1.66671e-05	Cdc6	cell division cycle 6 [Source:RGD Symbol;Acc:1309157]
ENSRNOG00000004417	-1.78638	4.79356	6.1295e-05	0.00277907	Fam117a	family with sequence similarity 117, member A [Source:RGD Symbol;Acc:1561062]
ENSRNOG00000010688	-1.76197	2.71675	5.00025e-05	0.00235012	Nrgn	neurogranin [Source:RGD Symbol;Acc:61833]
ENSRNOG00000018851	-1.74543	0.381177	0.000207771	0.00710911	Ppp2r2b	protein phosphatase 2, regulatory subunit B, beta [Source:RGD Symbol;Acc:631441]
ENSRNOG00000028137	-1.73496	6.0793	1.76449e-11	7.54673e-09	Mki67	marker of proliferation Ki-67 [Source:RGD Symbol;Acc:1305476]
ENSRNOG00000021248	-1.73421	6.79153	8.48726e-06	0.000585484	Cdc25b	cell division cycle 25B [Source:RGD Symbol;Acc:621500]
ENSRNOG00000048166	-1.72592	2.69875	2.79371e-09	7.31554e-07	Arhgap19	Rho GTPase activating protein 19 [Source:RGD Symbol;Acc:1593044]
ENSRNOG00000014786	-1.70721	3.3544	1.02874e-08	2.31574e-06	Ccne1	cyclin E1 [Source:RGD Symbol;Acc:2294]
ENSRNOG00000032596	-1.70365	0.879419	8.11992e-05	0.0034845	RT1-T24-1	RT1 class I, locus T24, gene 1 [Source:RGD Symbol;Acc:1359499]
ENSRNOG00000005390	-1.69516	3.15366	4.94745e-09	1.22078e-06	Nup210	nucleoporin 210 [Source:RGD Symbol;Acc:69339]
ENSRNOG00000052444	-1.69322	4.9067	1.00897e-09	2.82641e-07	RGD1563091	similar to OEF2 [Source:RGD Symbol;Acc:1563091]
ENSRNOG00000001766	-1.693	7.03827	2.44863e-07	3.14183e-05	Tfrc	transferrin receptor [Source:RGD Symbol;Acc:70488]
ENSRNOG00000022261	-1.68803	2.39789	3.22616e-08	5.91355e-06	Cenpu	centromere protein U [Source:RGD Symbol;Acc:1562566]
ENSRNOG00000007546	-1.68172	4.61972	6.35271e-08	1.03179e-05	Asns	asparagine synthetase (glutamine-hydrolyzing) [Source:RGD Symbol;Acc:2162]
ENSRNOG00000030058	-1.67816	1.2851	0.000156546	0.00572263	LOC100359600	karyopherin alpha 2-like [Source:RGD Symbol;Acc:2325125]
ENSRNOG00000011241	-1.66996	4.77259	0.000297961	0.00954842	Tfdp2	transcription factor Dp-2 [Source:RGD Symbol;Acc:1305814]
ENSRNOG00000000186	-1.66222	2.38017	2.06475e-06	0.000176618	Tst	thiosulfate sulfurtransferase [Source:RGD Symbol;Acc:3913]
ENSRNOG00000020701	-1.66114	2.84423	1.66684e-06	0.000147498	Brca1	BRCA1, DNA repair associated [Source:RGD Symbol;Acc:2218]
ENSRNOG00000054286	-1.65617	2.51283	1.21046e-07	1.72571e-05	Rrm2	ribonucleotide reductase regulatory subunit M2 [Source:RGD Symbol;Acc:1598310]
ENSRNOG00000018224	-1.64486	0.637222	1.27943e-05	0.000800796	AABR07033020.1
ENSRNOG00000021478	-1.64297	1.19826	3.757e-06	0.000290398	Tpd52l1	tumor protein D52-like 1 [Source:RGD Symbol;Acc:1594796]
ENSRNOG00000001654	-1.64118	5.30442	3.74238e-10	1.23124e-07	Cpox	coproporphyrinogen oxidase [Source:RGD Symbol;Acc:1311817]
ENSRNOG00000046086	-1.6311	1.55376	9.67263e-07	9.40224e-05	Tmc8	transmembrane channel-like 8 [Source:RGD Symbol;Acc:1591150]
ENSRNOG00000017762	-1.61758	2.22278	7.10671e-05	0.00315523	Cdhr5	cadherin-related family member 5 [Source:RGD Symbol;Acc:620504]
ENSRNOG00000049033	-1.61268	2.53162	5.33502e-07	5.79634e-05	Racgap1	Rac GTPase-activating protein 1 [Source:RGD Symbol;Acc:1305912]
ENSRNOG00000018053	-1.6121	6.81776	2.89698e-06	0.00023526	Fech	ferrochelatase [Source:RGD Symbol;Acc:1307556]
ENSRNOG00000043077	-1.60722	4.22782	2.50632e-07	3.18402e-05	Zfpm1	zinc finger protein, multitype 1 [Source:RGD Symbol;Acc:1582810]
ENSRNOG00000047321	-1.60106	11.8556	1.56055e-06	0.000139052	Hba-a2	hemoglobin alpha, adult chain 2 [Source:RGD Symbol;Acc:1359364]
ENSRNOG00000012835	-1.59768	2.79265	1.08208e-06	0.000103614	Espl1	extra spindle pole bodies like 1, separase [Source:RGD Symbol;Acc:1306266]
ENSRNOG00000029886	-1.59224	12.8792	1.11462e-05	0.000725975	Hba-a2	hemoglobin alpha, adult chain 2 [Source:RGD Symbol;Acc:1359364]
ENSRNOG00000018815	-1.58482	3.69173	7.3487e-09	1.71438e-06	Plk1	polo-like kinase 1 [Source:RGD Symbol;Acc:3352]
ENSRNOG00000020151	-1.58206	1.6871	0.00012333	0.00483928	Cdh1	cadherin 1 [Source:RGD Symbol;Acc:69279]
ENSRNOG00000006996	-1.57989	3.34641	1.75628e-08	3.62004e-06	Mms22l	MMS22-like, DNA repair protein [Source:RGD Symbol;Acc:1304693]
ENSRNOG00000030449	-1.57736	2.34834	0.000153204	0.00564623	Gsta4	glutathione S-transferase alpha 4 [Source:RGD Symbol;Acc:1309970]
ENSRNOG00000023410	-1.56629	4.99832	1.91146e-05	0.00109982	Apol9a	apolipoprotein L 9a [Source:RGD Symbol;Acc:1562332]
ENSRNOG00000015206	-1.56484	4.90343	5.67504e-08	9.43378e-06	Alad	aminolevulinate dehydratase [Source:RGD Symbol;Acc:2083]
ENSRNOG00000017260	-1.56123	6.09121	3.87937e-07	4.4443e-05	Cdr2	cerebellar degeneration-related protein 2 [Source:RGD Symbol;Acc:1310578]
ENSRNOG00000021713	-1.56105	2.9321	0.00010076	0.00406559	Kif18b	kinesin family member 18B [Source:RGD Symbol;Acc:1310360]
ENSRNOG00000013148	-1.55884	2.16798	4.67435e-06	0.000348701	Rad54l	RAD54 like (S. cerevisiae) [Source:RGD Symbol;Acc:1310600]
ENSRNOG00000012543	-1.55308	4.65535	9.32043e-09	2.13554e-06	Mcm3	minichromosome maintenance complex component 3 [Source:RGD Symbol;Acc:1305168]
ENSRNOG00000011777	-1.54937	3.83636	1.89958e-08	3.73537e-06	Spag5	sperm associated antigen 5 [Source:RGD Symbol;Acc:620152]
ENSRNOG00000011263	-1.53691	3.98529	1.19694e-08	2.60305e-06	Plac9	placenta-specific 9 [Source:RGD Symbol;Acc:1306662]
ENSRNOG00000005522	-1.53158	2.85287	0.000227858	0.00775501	Sh3yl1	SH3 and SYLF domain containing 1 [Source:RGD Symbol;Acc:1306440]
ENSRNOG00000058105	-1.53107	10.4908	9.08109e-07	9.03251e-05	Hbb	hemoglobin subunit beta [Source:RGD Symbol;Acc:2783]
ENSRNOG00000017720	-1.53	4.48368	2.36569e-07	3.06608e-05	Mxd1	max dimerization protein 1 [Source:RGD Symbol;Acc:1564525]
ENSRNOG00000000529	-1.52365	2.98668	2.31942e-07	3.03678e-05	Pim1	Pim-1 proto-oncogene, serine/threonine kinase [Source:RGD Symbol;Acc:3330]
ENSRNOG00000031785	-1.52219	1.00884	9.21487e-05	0.00380886	Krt76	keratin 76 [Source:RGD Symbol;Acc:1303078]
ENSRNOG00000003388	-1.51513	4.53304	9.35545e-07	9.23383e-05	Cenpf	centromere protein F [Source:RGD Symbol;Acc:628667]
ENSRNOG00000019627	-1.5037	7.24711	0.000188605	0.00654051	Mybpc2	myosin binding protein C, fast-type [Source:RGD Symbol;Acc:1311596]
ENSRNOG00000055111	-1.50287	3.15544	6.43229e-06	0.000462088	AABR07000658.1
ENSRNOG00000023614	-1.49468	0.955249	0.000128126	0.00496671	Hsh2d	hematopoietic SH2 domain containing [Source:RGD Symbol;Acc:2321939]
ENSRNOG00000023202	-1.49158	5.99839	1.87701e-05	0.00108486	Usp15	ubiquitin specific peptidase 15 [Source:RGD Symbol;Acc:628795]
ENSRNOG00000013409	-1.49131	4.77675	7.5062e-05	0.00329836	Gclm	glutamate cysteine ligase, modifier subunit [Source:RGD Symbol;Acc:619871]
ENSRNOG00000023536	-1.4807	1.2537	9.24502e-05	0.00380886	Adgrd1	adhesion G protein-coupled receptor D1 [Source:RGD Symbol;Acc:1594795]
ENSRNOG00000001528	-1.47645	4.86282	3.69027e-07	4.34403e-05	Gap43	growth associated protein 43 [Source:RGD Symbol;Acc:62071]
ENSRNOG00000010390	-1.4661	6.06085	4.89309e-06	0.000358761	Hmbs	hydroxymethylbilane synthase [Source:RGD Symbol;Acc:2801]
ENSRNOG00000004245	-1.46005	3.07475	1.75325e-07	2.36799e-05	Mgst3	microsomal glutathione S-transferase 3 [Source:RGD Symbol;Acc:1306373]
ENSRNOG00000017993	-1.45546	3.82007	5.58148e-08	9.42316e-06	Abcb10	ATP binding cassette subfamily B member 10 [Source:RGD Symbol;Acc:1311222]
ENSRNOG00000020322	-1.45434	1.71117	1.56542e-05	0.000929904	Asb1	ankyrin repeat and SOCS box-containing 1 [Source:RGD Symbol;Acc:1310760]
ENSRNOG00000011518	-1.45093	1.58265	1.7084e-06	0.000149119	Dusp26	dual specificity phosphatase 26 [Source:RGD Symbol;Acc:1310090]
ENSRNOG00000060130	-1.44976	4.00896	0.000285803	0.00930745	Ypel4	yippee-like 4 [Source:RGD Symbol;Acc:1560142]
ENSRNOG00000028814	-1.44498	4.19112	0.000167701	0.00596058	Oasl2	2'-5' oligoadenylate synthetase-like 2 [Source:RGD Symbol;Acc:1307351]
ENSRNOG00000000563	-1.43362	5.10444	5.73482e-08	9.43378e-06	Adamts14	ADAM metallopeptidase with thrombospondin type 1 motif, 14 [Source:RGD Symbol;Acc:1308899]
ENSRNOG00000043176	-1.42837	3.1199	8.71381e-07	8.75972e-05	RGD1565355	similar to fatty acid translocase/CD36 [Source:RGD Symbol;Acc:1565355]
ENSRNOG00000019100	-1.42447	3.06557	7.58547e-07	7.91294e-05	Kif2c	kinesin family member 2C [Source:RGD Symbol;Acc:620239]
ENSRNOG00000015529	-1.40206	3.69252	1.31852e-07	1.85911e-05	Cdca3	cell division cycle associated 3 [Source:RGD Symbol;Acc:1359093]
ENSRNOG00000008243	-1.40021	2.98099	0.00023892	0.0080251	Slc43a1	solute carrier family 43 member 1 [Source:RGD Symbol;Acc:1308229]
ENSRNOG00000020525	-1.39657	8.80362	1.14708e-07	1.66671e-05	Col5a3	collagen type V alpha 3 chain [Source:RGD Symbol;Acc:70922]
ENSRNOG00000007221	-1.39369	4.80192	2.609e-07	3.28197e-05	Dut	deoxyuridine triphosphatase [Source:RGD Symbol;Acc:620849]
ENSRNOG00000038035	-1.39253	3.86117	8.95437e-06	0.000607902	Kif4a	kinesin family member 4A [Source:RGD Symbol;Acc:620526]
ENSRNOG00000025167	-1.38614	3.35854	7.96958e-08	1.21735e-05	Sema4b	semaphorin 4B [Source:RGD Symbol;Acc:1307872]
ENSRNOG00000017601	-1.37598	1.88393	2.70633e-05	0.00143492	Srd5a1	steroid 5 alpha-reductase 1 [Source:RGD Symbol;Acc:3757]
ENSRNOG00000014336	-1.37354	4.43501	3.89166e-08	7.03294e-06	Mcm5	minichromosome maintenance complex component 5 [Source:RGD Symbol;Acc:1306616]
ENSRNOG00000018824	-1.37348	4.0647	2.26632e-06	0.000192577	Slc7a5	solute carrier family 7 member 5 [Source:RGD Symbol;Acc:620639]
ENSRNOG00000058539	-1.37279	3.97729	4.25384e-06	0.000325454	Ccnb1	cyclin B1 [Source:RGD Symbol;Acc:2291]
ENSRNOG00000010133	-1.36664	7.57644	9.85669e-05	0.00400225	Bpgm	bisphosphoglycerate mutase [Source:RGD Symbol;Acc:735018]
ENSRNOG00000020647	-1.36562	1.36886	0.000159209	0.00576393	Ctsg	cathepsin G [Source:RGD Symbol;Acc:1307681]
ENSRNOG00000021265	-1.35948	1.45948	0.000310878	0.00989795	Cds2	CDP-diacylglycerol synthase 2 [Source:RGD Symbol;Acc:621186]
ENSRNOG00000009334	-1.3512	4.23992	2.36452e-05	0.00130211	Knstrn	kinetochore-localized astrin/SPAG5 binding protein [Source:RGD Symbol;Acc:1303240]
ENSRNOG00000031440	-1.34796	1.93279	1.20372e-05	0.000760835	Nova1	NOVA alternative splicing regulator 1 [Source:RGD Symbol;Acc:621345]
ENSRNOG00000059997	-1.34252	1.44258	0.000154016	0.00564623	Brip1	BRCA1 interacting protein C-terminal helicase 1 [Source:RGD Symbol;Acc:1307659]
ENSRNOG00000045989	-1.33366	6.58548	7.81995e-05	0.00339384	Hba-a3	hemoglobin alpha, adult chain 3 [Source:RGD Symbol;Acc:1359209]
ENSRNOG00000047314	-1.33056	5.5227	1.23145e-06	0.000113722	Tk1	thymidine kinase 1 [Source:RGD Symbol;Acc:621014]
ENSRNOG00000022537	-1.32147	2.21792	4.3625e-05	0.00209645	E2f8	E2F transcription factor 8 [Source:RGD Symbol;Acc:1308091]
ENSRNOG00000002004	-1.30845	1.22432	0.000158053	0.00574497	Prdm8	PR/SET domain 8 [Source:RGD Symbol;Acc:1311628]
ENSRNOG00000018247	-1.30486	3.00925	3.27396e-06	0.000262551	Dhx58	DEXH-box helicase 58 [Source:RGD Symbol;Acc:1310093]
ENSRNOG00000012862	-1.3027	1.82569	2.27372e-05	0.00126844	Spsb4	splA/ryanodine receptor domain and SOCS box containing 4 [Source:RGD Symbol;Acc:1562307]
ENSRNOG00000013970	-1.29504	3.1312	1.28634e-05	0.000801218	Cdt1	chromatin licensing and DNA replication factor 1 [Source:RGD Symbol;Acc:1309211]
ENSRNOG00000004195	-1.29247	1.79955	0.000130592	0.00503191	Dtl	denticleless E3 ubiquitin protein ligase homolog [Source:RGD Symbol;Acc:1310439]
ENSRNOG00000010515	-1.29065	4.84554	3.53007e-05	0.00174209	Trim59	tripartite motif-containing 59 [Source:RGD Symbol;Acc:1311956]
ENSRNOG00000011654	-1.28761	4.21	3.57213e-07	4.32397e-05	Plk4	polo-like kinase 4 [Source:RGD Symbol;Acc:1305390]
ENSRNOG00000000795	-1.27499	4.24299	5.49747e-06	0.00039852	RT1-N3	RT1 class Ib, locus N3 [Source:RGD Symbol;Acc:1598370]
ENSRNOG00000013820	-1.26984	1.45484	7.85926e-05	0.00339536	Tnfrsf14	TNF receptor superfamily member 14 [Source:RGD Symbol;Acc:1310115]
ENSRNOG00000032472	-1.26945	3.10641	1.41413e-05	0.000861693	Adgrg2	adhesion G protein-coupled receptor G2 [Source:RGD Symbol;Acc:628618]
ENSRNOG00000002903	-1.26354	5.814	7.8293e-05	0.00339384	Specc1	sperm antigen with calponin homology and coiled-coil domains 1 [Source:RGD Symbol;Acc:1309718]
ENSRNOG00000015423	-1.25959	4.69368	0.000132245	0.00504447	Ccna2	cyclin A2 [Source:RGD Symbol;Acc:621059]
ENSRNOG00000002181	-1.25779	1.82928	8.64794e-05	0.00365006	Helq	helicase, POLQ-like [Source:RGD Symbol;Acc:1560216]
ENSRNOG00000025502	-1.25366	2.83123	3.21387e-05	0.00164292	Arhgef37	Rho guanine nucleotide exchange factor 37 [Source:RGD Symbol;Acc:1560471]
ENSRNOG00000025604	-1.24182	3.44295	2.87349e-06	0.000234839	Atad2	ATPase family, AAA domain containing 2 [Source:RGD Symbol;Acc:1304849]
ENSRNOG00000001050	-1.2385	5.32102	1.15433e-06	0.000108868	Eif2ak1	eukaryotic translation initiation factor 2 alpha kinase 1 [Source:RGD Symbol;Acc:70883]
ENSRNOG00000039284	-1.23717	4.35881	6.57938e-06	0.000467896	Haus4	HAUS augmin-like complex, subunit 4 [Source:RGD Symbol;Acc:1305288]
ENSRNOG00000004206	-1.23614	6.8777	9.59084e-06	0.000644293	Glrx5	glutaredoxin 5 [Source:RGD Symbol;Acc:1308383]
ENSRNOG00000005115	-1.23112	3.30609	3.3258e-06	0.000265051	Asf1b	anti-silencing function 1B histone chaperone [Source:RGD Symbol;Acc:1304918]
ENSRNOG00000008165	-1.22987	4.8625	0.00026171	0.00863241	Tpx2	TPX2, microtubule nucleation factor [Source:RGD Symbol;Acc:1311894]
ENSRNOG00000013368	-1.22964	5.24593	8.88062e-05	0.00369358	Plcl2	phospholipase C-like 2 [Source:RGD Symbol;Acc:1305941]
ENSRNOG00000053026	-1.22232	2.97096	4.31914e-06	0.000325993	Shcbp1	SHC binding and spindle associated 1 [Source:RGD Symbol;Acc:1590844]
ENSRNOG00000000299	-1.21865	2.82499	0.000132006	0.00504447	Foxo3	forkhead box O3 [Source:RGD Symbol;Acc:1309196]
ENSRNOG00000009503	-1.21756	3.64283	1.55328e-06	0.000139052	Depdc1	DEP domain containing 1 [Source:RGD Symbol;Acc:1306987]
ENSRNOG00000015948	-1.20889	4.35161	1.36396e-07	1.90227e-05	Slc1a5	solute carrier family 1 member 5 [Source:RGD Symbol;Acc:708512]
ENSRNOG00000011287	-1.19515	2.94434	2.35875e-05	0.00130211	Minpp1	multiple inositol-polyphosphate phosphatase 1 [Source:RGD Symbol;Acc:3089]
ENSRNOG00000016618	-1.19212	3.94521	2.94299e-05	0.00152264	Tmem52	transmembrane protein 52 [Source:RGD Symbol;Acc:2318502]
ENSRNOG00000018143	-1.18578	1.01256	0.000229024	0.00777409	Hpdl	4-hydroxyphenylpyruvate dioxygenase-like [Source:RGD Symbol;Acc:1310014]
ENSRNOG00000017981	-1.17064	2.74416	0.000181985	0.00636254	Mcm10	minichromosome maintenance 10 replication initiation factor [Source:RGD Symbol;Acc:1311330]
ENSRNOG00000002930	-1.16792	2.23074	4.1606e-05	0.00201452	Ppl	periplakin [Source:RGD Symbol;Acc:1305511]
ENSRNOG00000018241	-1.1633	4.70141	0.000240919	0.00807111	Ank1	ankyrin 1 [Source:RGD Symbol;Acc:1309620]
ENSRNOG00000011167	-1.16092	3.3652	3.46078e-06	0.000271318	Wdhd1	WD repeat and HMG-box DNA binding protein 1 [Source:RGD Symbol;Acc:1310200]
ENSRNOG00000050819	-1.15665	3.62745	0.000277248	0.00907492	Birc5	baculoviral IAP repeat-containing 5 [Source:RGD Symbol;Acc:70499]
ENSRNOG00000030568	-1.15573	3.89367	8.14666e-07	8.36238e-05	Rgs12	regulator of G-protein signaling 12 [Source:RGD Symbol;Acc:3564]
ENSRNOG00000004210	-1.15482	4.77491	3.80338e-05	0.00186264	Osr1	odd-skipped related transciption factor 1 [Source:RGD Symbol;Acc:1311807]
ENSRNOG00000045846	-1.15199	2.49857	6.60678e-05	0.00296404	Rfx2	regulatory factor X2 [Source:RGD Symbol;Acc:1588579]
ENSRNOG00000024077	-1.14932	3.3341	7.74311e-06	0.000542906	Fbxo5	F-box protein 5 [Source:RGD Symbol;Acc:1309405]
ENSRNOG00000055300	-1.14856	4.14481	0.0001617	0.00582802	Ncapd2	non-SMC condensin I complex, subunit D2 [Source:RGD Symbol;Acc:1562596]
ENSRNOG00000053047	-1.14758	5.84773	5.27395e-05	0.00245181	Top2a	topoisomerase (DNA) II alpha [Source:RGD Symbol;Acc:62048]
ENSRNOG00000058288	-1.14684	4.29295	1.85785e-06	0.000159987	Tcf19	transcription factor 19 [Source:RGD Symbol;Acc:1302974]
ENSRNOG00000015257	-1.14612	2.2543	0.00015354	0.00564623	Coro2b	coronin 2B [Source:RGD Symbol;Acc:1561953]
ENSRNOG00000008055	-1.14178	3.97337	6.60036e-06	0.000467896	Ccne2	cyclin E2 [Source:RGD Symbol;Acc:1307783]
ENSRNOG00000006828	-1.1417	5.32652	0.000122075	0.0048264	Baz1a	bromodomain adjacent to zinc finger domain, 1A [Source:RGD Symbol;Acc:1306199]
ENSRNOG00000016888	-1.14026	2.03389	0.000102263	0.00411326	Pask	PAS domain containing serine/threonine kinase [Source:RGD Symbol;Acc:1306146]
ENSRNOG00000022071	-1.13263	2.2198	3.38144e-05	0.00168822	Itga2b	integrin subunit alpha 2b [Source:RGD Symbol;Acc:1596428]
ENSRNOG00000005975	-1.12911	5.11147	1.12747e-05	0.000729915	LOC100362027	ribosomal protein L30-like [Source:RGD Symbol;Acc:2318953]
ENSRNOG00000053201	-1.12884	4.87913	8.00339e-07	8.28158e-05	Gpcpd1	glycerophosphocholine phosphodiesterase 1 [Source:RGD Symbol;Acc:735140]
ENSRNOG00000001580	-1.12568	3.30125	2.70128e-05	0.00143492	Hoxd9	homeo box D9 [Source:RGD Symbol;Acc:1582908]
ENSRNOG00000010994	-1.11246	2.32778	0.000290104	0.00935259	Has1	hyaluronan synthase 1 [Source:RGD Symbol;Acc:708528]
ENSRNOG00000049361	-1.11077	5.91548	6.6469e-05	0.0029703	Gas7	growth arrest specific 7 [Source:RGD Symbol;Acc:621550]
ENSRNOG00000010301	-1.1079	4.78686	1.14063e-05	0.000731771	Eif4e3	eukaryotic translation initiation factor 4E family member 3 [Source:RGD Symbol;Acc:1586185]
ENSRNOG00000013057	-1.10162	5.10777	9.7101e-06	0.000648512	Prc1	protein regulator of cytokinesis 1 [Source:RGD Symbol;Acc:1311754]
ENSRNOG00000015505	-1.09996	7.42417	2.55759e-06	0.000214487	Mfap5	microfibrillar associated protein 5 [Source:RGD Symbol;Acc:1307919]
ENSRNOG00000002746	-1.09814	8.50052	1.23196e-06	0.000113722	Fstl1	follistatin-like 1 [Source:RGD Symbol;Acc:68955]
ENSRNOG00000061085	-1.09291	3.15962	1.09106e-05	0.000714253	Fancd2	Fanconi anemia, complementation group D2 [Source:RGD Symbol;Acc:1303172]
ENSRNOG00000004921	-1.09147	4.25889	8.20126e-06	0.000568813	Nusap1	nucleolar and spindle associated protein 1 [Source:RGD Symbol;Acc:1305764]
ENSRNOG00000013304	-1.08547	3.79364	0.000114053	0.00453069	Arg1	arginase 1 [Source:RGD Symbol;Acc:2150]
ENSRNOG00000003703	-1.07865	5.19054	1.47569e-05	0.000892325	Mcm6	minichromosome maintenance complex component 6 [Source:RGD Symbol;Acc:61967]
ENSRNOG00000013767	-1.07806	2.36664	0.000184778	0.00642517	Ccdc61	coiled-coil domain containing 61 [Source:RGD Symbol;Acc:1307390]
ENSRNOG00000026502	-1.07283	2.46491	8.60194e-05	0.00364938	Dscc1	DNA replication and sister chromatid cohesion 1 [Source:RGD Symbol;Acc:1561749]
ENSRNOG00000016150	-1.07224	4.63319	0.000145865	0.00544067	Ifrd2	interferon-related developmental regulator 2 [Source:RGD Symbol;Acc:1310222]
ENSRNOG00000008533	-1.06943	2.77435	4.47893e-05	0.0021364	Ago2	argonaute 2, RISC catalytic component [Source:RGD Symbol;Acc:621255]
ENSRNOG00000008091	-1.06884	3.03283	3.26898e-05	0.00166446	Gins1	GINS complex subunit 1 [Source:RGD Symbol;Acc:1562246]
ENSRNOG00000009117	-1.06324	2.49234	7.5006e-05	0.00329836	Otub2	OTU deubiquitinase, ubiquitin aldehyde binding 2 [Source:RGD Symbol;Acc:1306688]
ENSRNOG00000008986	-1.06071	2.7734	5.97609e-05	0.00271912	Diaph3	diaphanous-related formin 3 [Source:RGD Symbol;Acc:1593287]
ENSRNOG00000003657	-1.05566	1.86407	0.000198995	0.00684532	Pkmyt1	protein kinase, membrane associated tyrosine/threonine 1 [Source:RGD Symbol;Acc:1305434]
ENSRNOG00000010917	-1.04367	2.31204	0.000139855	0.00526239	Bmp5	bone morphogenetic protein 5 [Source:RGD Symbol;Acc:1305979]
ENSRNOG00000011213	-1.04215	2.99231	5.32345e-05	0.00246589	Blm	Bloom syndrome RecQ like helicase [Source:RGD Symbol;Acc:1308810]
ENSRNOG00000028627	-1.04034	5.6721	1.41701e-05	0.000861693	Hmcn1	hemicentin 1 [Source:RGD Symbol;Acc:1564772]
ENSRNOG00000023013	-1.03905	2.83069	2.18468e-05	0.00122946	2017-03-03	membrane associated ring-CH-type finger 3 [Source:RGD Symbol;Acc:1359308]
ENSRNOG00000003217	-1.02455	6.60299	6.41279e-05	0.00289455	Lgals3bp	galectin 3 binding protein [Source:RGD Symbol;Acc:620837]
ENSRNOG00000052038	-1.01606	2.76234	0.000265607	0.00873846	Haus8	HAUS augmin-like complex, subunit 8 [Source:RGD Symbol;Acc:1311565]
ENSRNOG00000009339	-1.01538	3.9374	9.64763e-05	0.00395491	Cenpe	centromere protein E [Source:RGD Symbol;Acc:1307115]
ENSRNOG00000014902	-1.01404	2.14133	0.000234132	0.0079265	Stx11	syntaxin 11 [Source:RGD Symbol;Acc:1304744]
ENSRNOG00000007091	-1.00543	7.31921	0.000241981	0.00808558	Ly6e	lymphocyte antigen 6 complex, locus E [Source:RGD Symbol;Acc:1565342]
ENSRNOG00000020994	-0.994419	6.87184	9.69421e-05	0.00396135	Slc25a39	solute carrier family 25, member 39 [Source:RGD Symbol;Acc:1306193]
ENSRNOG00000025142	-0.993538	4.55046	0.000149004	0.00554167	Mex3b	mex-3 RNA binding family member B [Source:RGD Symbol;Acc:1306790]
ENSRNOG00000010274	-0.976181	5.35147	7.45341e-05	0.00329775	Smc4	structural maintenance of chromosomes 4 [Source:RGD Symbol;Acc:1306680]
ENSRNOG00000006060	-0.970388	5.58085	0.000164224	0.00590239	Matn2	matrilin 2 [Source:RGD Symbol;Acc:1305353]
ENSRNOG00000020531	-0.968462	3.86988	0.000157819	0.00574497	Fen1	flap structure-specific endonuclease 1 [Source:RGD Symbol;Acc:621821]
ENSRNOG00000011739	-0.964515	4.71615	9.75472e-06	0.000648512	Dennd4a	DENN domain containing 4A [Source:RGD Symbol;Acc:1562639]
ENSRNOG00000003721	-0.957089	4.05868	8.09276e-05	0.0034845	Paqr4	progestin and adipoQ receptor family member 4 [Source:RGD Symbol;Acc:1309533]
ENSRNOG00000018991	-0.954122	8.76859	9.97335e-05	0.00403685	Gsn	gelsolin [Source:RGD Symbol;Acc:1303089]
ENSRNOG00000018552	-0.91602	3.82811	9.26168e-05	0.00380886	Slc25a38	solute carrier family 25, member 38 [Source:RGD Symbol;Acc:1311914]
ENSRNOG00000042253	-0.914985	3.02153	0.000172525	0.0060815	Ecd	ecdysoneless cell cycle regulator [Source:RGD Symbol;Acc:1565023]
ENSRNOG00000018536	-0.90989	4.4681	0.000104151	0.00417613	Pck2	phosphoenolpyruvate carboxykinase 2 (mitochondrial) [Source:RGD Symbol;Acc:1311112]
ENSRNOG00000059903	-0.908977	5.05259	5.38757e-05	0.00248661	Thbs3	thrombospondin 3 [Source:RGD Symbol;Acc:1596780]
ENSRNOG00000056011	-0.89681	3.1864	0.000138432	0.00522417	LOC314140	ribose-phosphate pyrophosphokinase I -like [Source:RGD Symbol;Acc:1359636]
ENSRNOG00000009830	-0.879131	2.89271	0.000313457	0.00995536	Fam204a	family with sequence similarity 204, member A [Source:RGD Symbol;Acc:1305500]
ENSRNOG00000012817	-0.877204	6.95348	3.33919e-05	0.0016802	Lrrc17	leucine rich repeat containing 17 [Source:RGD Symbol;Acc:1560165]
ENSRNOG00000043143	-0.876455	4.25126	9.85077e-05	0.00400225	Eml1	echinoderm microtubule associated protein like 1 [Source:RGD Symbol;Acc:1306374]
ENSRNOG00000003365	-0.800859	3.74258	0.000248739	0.00828978	Cadm3	cell adhesion molecule 3 [Source:RGD Symbol;Acc:1307035]

## Sheet: Library stats
Sample	Qbit conc. (ng/ul)	Total reads	% failed	% accepted	nextfelx reads	% library non-redundancy	mapped	%mapped to transcripts	%minus	%plus
E1	2.42	42569271	2.39	97.61	6304593	16.09	2850672	0.4522	0.966	0.034
E2	16	49876905	4.26	95.74	8150016	18.07	4827337	0.5923	0.9713	0.0287
E3	43.8	60611307	9.75	90.25	25930805	50.04	17257044	0.6655	0.9772	0.0228
S1	0.53	25168463	0.27	99.73	5871118	24.91	3223640	0.5491	0.9698	0.0302
S2	68.2	53170899	6.78	93.22	15472340	33.08	8643978	0.5587	0.9698	0.0302
S3	41	38343610	4.51	95.49	5826001	16.99	3202383	0.5497	0.9579	0.0421
K1	3.8	40632422	3.3	96.7	3783021	10.34	1273261	0.3366	0.9482	0.0518
K2	34.2	51557730	6.24	93.76	24283969	53.02	16071701	0.6618	0.9759	0.0241
K3	1.6	55836591	11	89	22335778	47.68	14348770	0.6424	0.9703	0.0297
