# Supplementary material for: Electrical stimulation shifts healing/scarring towards regeneration in a rat limb amputation model
Source: Sci Rep. 2019 Aug 7;9:11433. doi: 10.1038/s41598-019-47389-w (PMC6685943; doi:10.1038/s41598-019-47389-w)
Supplement: Supplementary file 3 — Supplementary Table S2 [file 41598_2019_47389_MOESM3_ESM.xlsx]

## Sheet: S_vs_E.up_in_E.GOTERMS
SCROLL DOWN FOR TABLE
GO Term	Description	P-value	FDR q-value	Enrichment	N	B	n	b	Genes
GO:0032502	developmental process	1.89e-19	2.89e-15	1.66	17529	4561	562	243	[Dusp4 - dual specificity phosphatase 4, Gsc - goosecoid homeobox, Rdx - radixin, Rc3h1 - ring finger and ccch-type domains 1, Mybl2 - myeloblastosis oncogene-like 2, Raph1 - ras association (ralgds/af-6) and pleckstrin homology domains 1, Birc6 - baculoviral iap repeat-containing 6, Ctsz - cathepsin z, Creb5 - camp responsive element binding protein 5, Mtpn - myotrophin, Lif - leukemia inhibitor…
GO:0048856	anatomical structure development	9.07e-19	6.94e-15	1.85	17529	3139	562	186	[Lpcat1 - lysophosphatidylcholine acyltransferase 1, Gsc - goosecoid homeobox, Gli1 - gli family zinc finger 1, Nf1 - neurofibromin 1, Rdx - radixin, Rc3h1 - ring finger and ccch-type domains 1, Hapln1 - hyaluronan and proteoglycan link protein 1, Ddit4 - dna-damage-inducible transcript 4, Birc6 - baculoviral iap repeat-containing 6, Ngfr - nerve growth factor receptor, Creb5 - camp responsive el…
GO:0016043	cellular component organization	8.6e-17	4.38e-13	1.65	17529	4128	562	219	[Rdx - radixin, Srpk1 - srsf protein kinase 1, Rc3h1 - ring finger and ccch-type domains 1, Mybl2 - myeloblastosis oncogene-like 2, Acaca - acetyl-coa carboxylase alpha, Mtpn - myotrophin, Col6a1 - collagen, type vi, alpha 1, E2f5 - e2f transcription factor 5, Wdhd1 - wd repeat and hmg-box dna binding protein 1, Ube2c - ubiquitin-conjugating enzyme e2c, Ptprn - protein tyrosine phosphatase, recep…
GO:0051128	regulation of cellular component organization	1.32e-16	5.04e-13	1.99	17529	2246	562	143	[Nf1 - neurofibromin 1, Tppp - tubulin polymerization promoting protein, Rdx - radixin, Myo10 - myosin x, Esm1 - endothelial cell-specific molecule 1, Metrn - meteorin, glial cell differentiation regulator, Jdp2 - jun dimerization protein 2, Ctsz - cathepsin z, Ngfr - nerve growth factor receptor, Arrb1 - arrestin, beta 1, Tgfb2 - transforming growth factor, beta 2, Sema5a - sema domain, seven th…
GO:0071840	cellular component organization or biogenesis	3.88e-16	1.19e-12	1.63	17529	4181	562	219	[Rdx - radixin, Srpk1 - srsf protein kinase 1, Mybl2 - myeloblastosis oncogene-like 2, Rc3h1 - ring finger and ccch-type domains 1, Acaca - acetyl-coa carboxylase alpha, Mtpn - myotrophin, Col6a1 - collagen, type vi, alpha 1, E2f5 - e2f transcription factor 5, Wdhd1 - wd repeat and hmg-box dna binding protein 1, Ube2c - ubiquitin-conjugating enzyme e2c, Ptprn - protein tyrosine phosphatase, recep…
GO:0050793	regulation of developmental process	4.33e-15	1.1e-11	1.91	17529	2317	562	142	[Gli1 - gli family zinc finger 1, Nf1 - neurofibromin 1, Gpr37l1 - g protein-coupled receptor 37-like 1, Rdx - radixin, Rc3h1 - ring finger and ccch-type domains 1, Myo10 - myosin x, Metrn - meteorin, glial cell differentiation regulator, Jdp2 - jun dimerization protein 2, Ctsz - cathepsin z, Ngfr - nerve growth factor receptor, Tgfb2 - transforming growth factor, beta 2, Sema5a - sema domain, se…
GO:0006928	movement of cell or subcellular component	6.17e-14	1.35e-10	2.4	17529	1077	562	83	[Elmo1 - engulfment and cell motility 1, Ttc21b - tetratricopeptide repeat domain 21b, Erg - v-ets avian erythroblastosis virus e26 oncogene, Col5a1 - collagen, type v, alpha 1, Fmnl3 - formin-like 3, Ddit4 - dna-damage-inducible transcript 4, Tyro3 - tyro3 protein tyrosine kinase, Ngfr - nerve growth factor receptor, Unc5b - unc-5 homolog b (c. elegans), Lhx2 - lim homeobox 2, Ets1 - v-ets avian…
GO:0009653	anatomical structure morphogenesis	1e-13	1.91e-10	2.2	17529	1358	562	96	[Fancd2 - fanconi anemia, complementation group d2, Gsc - goosecoid homeobox, Gli1 - gli family zinc finger 1, Nf1 - neurofibromin 1, Sostdc1 - sclerostin domain containing 1, Nfatc1 - nuclear factor of activated t-cells, cytoplasmic, calcineurin-dependent 1, Col5a1 - collagen, type v, alpha 1, Actn1 - actinin, alpha 1, Ctsz - cathepsin z, Ngfr - nerve growth factor receptor, Tyro3 - tyro3 protei…
GO:0048869	cellular developmental process	1.56e-13	2.65e-10	1.79	17529	2617	562	150	[Gsc - goosecoid homeobox, Gli1 - gli family zinc finger 1, Nf1 - neurofibromin 1, Rdx - radixin, Rc3h1 - ring finger and ccch-type domains 1, Mybl2 - myeloblastosis oncogene-like 2, Metrn - meteorin, glial cell differentiation regulator, Ddit4 - dna-damage-inducible transcript 4, Ngfr - nerve growth factor receptor, Col24a1 - collagen, type xxiv, alpha 1, Creb5 - camp responsive element binding …
GO:0048513	animal organ development	2.15e-13	3.28e-10	2.08	17529	1572	562	105	[Gsc - goosecoid homeobox, Gli1 - gli family zinc finger 1, Nf1 - neurofibromin 1, Rc3h1 - ring finger and ccch-type domains 1, Ddit4 - dna-damage-inducible transcript 4, Birc6 - baculoviral iap repeat-containing 6, Ngfr - nerve growth factor receptor, Tgfb2 - transforming growth factor, beta 2, Tspan2 - tetraspanin 2, Ercc2 - excision repair cross-complementing rodent repair deficiency, compleme…
GO:0042127	regulation of cell proliferation	8.87e-13	1.23e-09	2.06	17529	1563	562	103	[Gli1 - gli family zinc finger 1, Nf1 - neurofibromin 1, Gpr37l1 - g protein-coupled receptor 37-like 1, Rc3h1 - ring finger and ccch-type domains 1, Esm1 - endothelial cell-specific molecule 1, Birc6 - baculoviral iap repeat-containing 6, Ctsz - cathepsin z, Ngfr - nerve growth factor receptor, Tgfb2 - transforming growth factor, beta 2, RGD1310335 - similar to riken cdna c330027c09, Nr2f2 - nuc…
GO:0048523	negative regulation of cellular process	1.16e-12	1.48e-09	1.55	17529	4137	562	206	[Dusp4 - dual specificity phosphatase 4, Gsc - goosecoid homeobox, Gpr37l1 - g protein-coupled receptor 37-like 1, Rdx - radixin, Rc3h1 - ring finger and ccch-type domains 1, Jdp2 - jun dimerization protein 2, Birc6 - baculoviral iap repeat-containing 6, Ctsz - cathepsin z, Unc5b - unc-5 homolog b (c. elegans), Lif - leukemia inhibitory factor, Khsrp - kh-type splicing regulatory protein, Gfi1b -…
GO:0040011	locomotion	4.28e-12	5.03e-09	2.47	17529	858	562	68	[Elmo1 - engulfment and cell motility 1, Erg - v-ets avian erythroblastosis virus e26 oncogene, Col5a1 - collagen, type v, alpha 1, Fmnl3 - formin-like 3, Ddit4 - dna-damage-inducible transcript 4, Tyro3 - tyro3 protein tyrosine kinase, Ets1 - v-ets avian erythroblastosis virus e26 oncogene homolog 1, Tgfb2 - transforming growth factor, beta 2, Arsb - arylsulfatase b, Nr2f2 - nuclear receptor sub…
GO:0016477	cell migration	7.61e-12	8.3e-09	2.65	17529	694	562	59	[Elmo1 - engulfment and cell motility 1, Erg - v-ets avian erythroblastosis virus e26 oncogene, Col5a1 - collagen, type v, alpha 1, Ddit4 - dna-damage-inducible transcript 4, Fmnl3 - formin-like 3, Tyro3 - tyro3 protein tyrosine kinase, Tgfb2 - transforming growth factor, beta 2, Arsb - arylsulfatase b, Nr2f2 - nuclear receptor subfamily 2, group f, member 2, Sema5a - sema domain, seven thrombosp…
GO:2000026	regulation of multicellular organismal development	1.04e-11	1.06e-08	1.91	17529	1812	562	111	[Gli1 - gli family zinc finger 1, Nf1 - neurofibromin 1, Gpr37l1 - g protein-coupled receptor 37-like 1, Rc3h1 - ring finger and ccch-type domains 1, Metrn - meteorin, glial cell differentiation regulator, Ctsz - cathepsin z, Ngfr - nerve growth factor receptor, Tgfb2 - transforming growth factor, beta 2, Sema5a - sema domain, seven thrombospondin repeats (type 1 and type 1-like), transmembrane d…
GO:0051239	regulation of multicellular organismal process	1.23e-11	1.17e-08	1.71	17529	2689	562	147	[Gli1 - gli family zinc finger 1, Nf1 - neurofibromin 1, Gpr37l1 - g protein-coupled receptor 37-like 1, Rc3h1 - ring finger and ccch-type domains 1, Metrn - meteorin, glial cell differentiation regulator, Ctsz - cathepsin z, Ngfr - nerve growth factor receptor, Arrb1 - arrestin, beta 1, Tgfb2 - transforming growth factor, beta 2, Nr2f2 - nuclear receptor subfamily 2, group f, member 2, Sema5a - …
GO:0048518	positive regulation of biological process	1.76e-11	1.58e-08	1.45	17529	5114	562	237	[Srpk1 - srsf protein kinase 1, Gpr37l1 - g protein-coupled receptor 37-like 1, Rdx - radixin, Rc3h1 - ring finger and ccch-type domains 1, Mybl2 - myeloblastosis oncogene-like 2, Jdp2 - jun dimerization protein 2, Birc6 - baculoviral iap repeat-containing 6, Ctsz - cathepsin z, Unc5b - unc-5 homolog b (c. elegans), Lat2 - linker for activation of t cells family, member 2, Creb5 - camp responsive…
GO:0048519	negative regulation of biological process	2.07e-11	1.76e-08	1.49	17529	4534	562	216	[Dusp4 - dual specificity phosphatase 4, Gsc - goosecoid homeobox, Gpr37l1 - g protein-coupled receptor 37-like 1, Rdx - radixin, Srpk1 - srsf protein kinase 1, Rc3h1 - ring finger and ccch-type domains 1, Jdp2 - jun dimerization protein 2, Birc6 - baculoviral iap repeat-containing 6, Ctsz - cathepsin z, Unc5b - unc-5 homolog b (c. elegans), Lif - leukemia inhibitory factor, Khsrp - kh-type splic…
GO:0048870	cell motility	3.3e-11	2.66e-08	2.49	17529	778	562	62	[Elmo1 - engulfment and cell motility 1, Erg - v-ets avian erythroblastosis virus e26 oncogene, Col5a1 - collagen, type v, alpha 1, Fmnl3 - formin-like 3, Ddit4 - dna-damage-inducible transcript 4, Tyro3 - tyro3 protein tyrosine kinase, Ets1 - v-ets avian erythroblastosis virus e26 oncogene homolog 1, Tgfb2 - transforming growth factor, beta 2, Arsb - arylsulfatase b, Nr2f2 - nuclear receptor sub…
GO:0048522	positive regulation of cellular process	6.08e-11	4.65e-08	1.47	17529	4639	562	218	[Gpr37l1 - g protein-coupled receptor 37-like 1, Rdx - radixin, Rc3h1 - ring finger and ccch-type domains 1, Mybl2 - myeloblastosis oncogene-like 2, Jdp2 - jun dimerization protein 2, Birc6 - baculoviral iap repeat-containing 6, Ctsz - cathepsin z, Unc5b - unc-5 homolog b (c. elegans), Creb5 - camp responsive element binding protein 5, Mtpn - myotrophin, Lif - leukemia inhibitory factor, Khsrp - …
GO:0030334	regulation of cell migration	6.94e-11	5.05e-08	2.51	17529	733	562	59	[Nf1 - neurofibromin 1, Sdc3 - syndecan 3, Apod - apolipoprotein d, Gli1 - gli family zinc finger 1, Rdx - radixin, Ets1 - v-ets avian erythroblastosis virus e26 oncogene homolog 1, Tgfb2 - transforming growth factor, beta 2, Arsb - arylsulfatase b, Nr2f2 - nuclear receptor subfamily 2, group f, member 2, Sema5a - sema domain, seven thrombospondin repeats (type 1 and type 1-like), transmembrane d…
GO:0030155	regulation of cell adhesion	9.31e-11	6.47e-08	2.65	17529	623	562	53	[Fancd2 - fanconi anemia, complementation group d2, Nf1 - neurofibromin 1, Apod - apolipoprotein d, Rdx - radixin, Rc3h1 - ring finger and ccch-type domains 1, Myo10 - myosin x, Ets1 - v-ets avian erythroblastosis virus e26 oncogene homolog 1, Tgfb2 - transforming growth factor, beta 2, Sema5a - sema domain, seven thrombospondin repeats (type 1 and type 1-like), transmembrane domain (tm) and shor…
GO:0051983	regulation of chromosome segregation	1.05e-10	7.01e-08	6.76	17529	83	562	18	[Rcc2 - regulator of chromosome condensation 2, Bub1b - bub1 mitotic checkpoint serine/threonine kinase b, Rad18 - rad18 homolog (s. cerevisiae), Racgap1 - rac gtpase-activating protein 1, Chtf18 - ctf18, chromosome transmission fidelity factor 18 homolog (s. cerevisiae), Plk1 - polo-like kinase 1, Ect2 - epithelial cell transforming sequence 2 oncogene, Recql4 - recq protein-like 4, Mki67 - anti…
GO:1903047	mitotic cell cycle process	1.53e-10	9.72e-08	3.2	17529	380	562	39	[Nfatc1 - nuclear factor of activated t-cells, cytoplasmic, calcineurin-dependent 1, Bub1b - bub1 mitotic checkpoint serine/threonine kinase b, Mybl2 - myeloblastosis oncogene-like 2, Cdc45 - cell division cycle 45, Rcc1 - regulator of chromosome condensation 1, Eme1 - essential meiotic structure-specific endonuclease 1, Tcf19 - transcription factor 19, Plk1 - polo-like kinase 1, Eml1 - echinoder…
GO:0010564	regulation of cell cycle process	1.65e-10	1.01e-07	2.85	17529	503	562	46	[Tom1l1 - target of myb1 (chicken)-like 1, Gli1 - gli family zinc finger 1, Atad5 - atpase family, aaa domain containing 5, Rdx - radixin, Bub1b - bub1 mitotic checkpoint serine/threonine kinase b, Cdc45 - cell division cycle 45, Rcc1 - regulator of chromosome condensation 1, Birc6 - baculoviral iap repeat-containing 6, Plk1 - polo-like kinase 1, Recql4 - recq protein-like 4, Ercc2 - excision rep…
GO:0045595	regulation of cell differentiation	2.22e-10	1.3e-07	1.89	17529	1669	562	101	[Gli1 - gli family zinc finger 1, Nf1 - neurofibromin 1, Gpr37l1 - g protein-coupled receptor 37-like 1, Rc3h1 - ring finger and ccch-type domains 1, Metrn - meteorin, glial cell differentiation regulator, Ctsz - cathepsin z, Jdp2 - jun dimerization protein 2, Ngfr - nerve growth factor receptor, Tgfb2 - transforming growth factor, beta 2, Sema5a - sema domain, seven thrombospondin repeats (type …
GO:0030154	cell differentiation	2.53e-10	1.43e-07	1.84	17529	1814	562	107	[Gli1 - gli family zinc finger 1, Nf1 - neurofibromin 1, Mybl2 - myeloblastosis oncogene-like 2, Rc3h1 - ring finger and ccch-type domains 1, Metrn - meteorin, glial cell differentiation regulator, Ddit4 - dna-damage-inducible transcript 4, Ngfr - nerve growth factor receptor, Col24a1 - collagen, type xxiv, alpha 1, Creb5 - camp responsive element binding protein 5, Tgfb2 - transforming growth fa…
GO:0051726	regulation of cell cycle	2.93e-10	1.6e-07	2.3	17529	882	562	65	[Gli1 - gli family zinc finger 1, Rdx - radixin, Bub1b - bub1 mitotic checkpoint serine/threonine kinase b, Birc6 - baculoviral iap repeat-containing 6, Ngfr - nerve growth factor receptor, Ets1 - v-ets avian erythroblastosis virus e26 oncogene homolog 1, Plk1 - polo-like kinase 1, Tgfb2 - transforming growth factor, beta 2, Ercc2 - excision repair cross-complementing rodent repair deficiency, co…
GO:0006259	DNA metabolic process	3.48e-10	1.84e-07	2.68	17529	570	562	49	[Fancd2 - fanconi anemia, complementation group d2, Rrm2 - ribonucleotide reductase m2, Polg - polymerase (dna directed), gamma, Mdc1 - mediator of dna damage checkpoint 1, Chtf18 - ctf18, chromosome transmission fidelity factor 18 homolog (s. cerevisiae), Ercc2 - excision repair cross-complementing rodent repair deficiency, complementation group 2, Eya3 - eyes absent homolog 3 (drosophila), Pold…
GO:0051094	positive regulation of developmental process	3.7e-10	1.89e-07	2.01	17529	1318	562	85	[Gli1 - gli family zinc finger 1, Nf1 - neurofibromin 1, Gpr37l1 - g protein-coupled receptor 37-like 1, Ptgis - prostaglandin i2 (prostacyclin) synthase, Metrn - meteorin, glial cell differentiation regulator, Ngfr - nerve growth factor receptor, Ets1 - v-ets avian erythroblastosis virus e26 oncogene homolog 1, Tgfb2 - transforming growth factor, beta 2, Arsb - arylsulfatase b, Sema5a - sema dom…
GO:2000145	regulation of cell motility	6.42e-10	3.17e-07	2.37	17529	776	562	59	[Gli1 - gli family zinc finger 1, Apod - apolipoprotein d, Nf1 - neurofibromin 1, Sdc3 - syndecan 3, Rdx - radixin, Ets1 - v-ets avian erythroblastosis virus e26 oncogene homolog 1, Tgfb2 - transforming growth factor, beta 2, Arsb - arylsulfatase b, Nr2f2 - nuclear receptor subfamily 2, group f, member 2, Sema5a - sema domain, seven thrombospondin repeats (type 1 and type 1-like), transmembrane d…
GO:0022603	regulation of anatomical structure morphogenesis	6.47e-10	3.09e-07	2.24	17529	920	562	66	[Gli1 - gli family zinc finger 1, Nf1 - neurofibromin 1, Rdx - radixin, Rc3h1 - ring finger and ccch-type domains 1, Erg - v-ets avian erythroblastosis virus e26 oncogene, Ptgis - prostaglandin i2 (prostacyclin) synthase, Myo10 - myosin x, Col5a1 - collagen, type v, alpha 1, Metrn - meteorin, glial cell differentiation regulator, Fmnl3 - formin-like 3, Ngfr - nerve growth factor receptor, Ets1 - …
GO:0009888	tissue development	8.87e-10	4.11e-07	2.58	17529	605	562	50	[Nf1 - neurofibromin 1, Apod - apolipoprotein d, Erg - v-ets avian erythroblastosis virus e26 oncogene, Ptgis - prostaglandin i2 (prostacyclin) synthase, Col5a1 - collagen, type v, alpha 1, Birc6 - baculoviral iap repeat-containing 6, Creb5 - camp responsive element binding protein 5, Lhx2 - lim homeobox 2, Tgfb2 - transforming growth factor, beta 2, Nr2f2 - nuclear receptor subfamily 2, group f,…
GO:0007166	cell surface receptor signaling pathway	1.07e-09	4.82e-07	1.92	17529	1461	562	90	[Gli1 - gli family zinc finger 1, Ttc21b - tetratricopeptide repeat domain 21b, Nf1 - neurofibromin 1, Sostdc1 - sclerostin domain containing 1, Strn - striatin, calmodulin binding protein, Tjp2 - tight junction protein 2, Ddit4 - dna-damage-inducible transcript 4, Unc5b - unc-5 homolog b (c. elegans), Ngfr - nerve growth factor receptor, Lat2 - linker for activation of t cells family, member 2, …
GO:0051270	regulation of cellular component movement	1.18e-09	5.15e-07	2.28	17529	850	562	62	[Gli1 - gli family zinc finger 1, Sdc3 - syndecan 3, Apod - apolipoprotein d, Nf1 - neurofibromin 1, Rdx - radixin, Actn1 - actinin, alpha 1, Ets1 - v-ets avian erythroblastosis virus e26 oncogene homolog 1, Tgfb2 - transforming growth factor, beta 2, Arsb - arylsulfatase b, Nr2f2 - nuclear receptor subfamily 2, group f, member 2, Sema5a - sema domain, seven thrombospondin repeats (type 1 and typ…
GO:0008284	positive regulation of cell proliferation	1.2e-09	5.1e-07	2.24	17529	892	562	64	[Gli1 - gli family zinc finger 1, Nf1 - neurofibromin 1, Gpr37l1 - g protein-coupled receptor 37-like 1, Rrm2 - ribonucleotide reductase m2, Esm1 - endothelial cell-specific molecule 1, Ctsz - cathepsin z, Birc6 - baculoviral iap repeat-containing 6, Ngfr - nerve growth factor receptor, Ets1 - v-ets avian erythroblastosis virus e26 oncogene homolog 1, Tgfb2 - transforming growth factor, beta 2, R…
GO:0007059	chromosome segregation	1.61e-09	6.64e-07	6.17	17529	86	562	17	[Srpk1 - srsf protein kinase 1, Cdca2 - cell division cycle associated 2, Rcc1 - regulator of chromosome condensation 1, Plk1 - polo-like kinase 1, Ercc2 - excision repair cross-complementing rodent repair deficiency, complementation group 2, Ino80 - ino80 homolog (s. cerevisiae), Smc4 - structural maintenance of chromosomes 4, Birc5 - baculoviral iap repeat-containing 5, Pmf1 - polyamine-modulat…
GO:0007010	cytoskeleton organization	1.85e-09	7.42e-07	2.44	17529	677	562	53	[Elmo1 - engulfment and cell motility 1, Nf1 - neurofibromin 1, Tppp - tubulin polymerization promoting protein, Mybl2 - myeloblastosis oncogene-like 2, Actn1 - actinin, alpha 1, Fmnl3 - formin-like 3, Arrb1 - arrestin, beta 1, Plk1 - polo-like kinase 1, Syne3 - spectrin repeat containing, nuclear envelope family member 3, Gas8 - growth arrest specific 8, Arhgef17 - rho guanine nucleotide exchang…
GO:0033043	regulation of organelle organization	2.38e-09	9.32e-07	2.06	17529	1123	562	74	[Rdx - radixin, Bub1b - bub1 mitotic checkpoint serine/threonine kinase b, Jdp2 - jun dimerization protein 2, Arrb1 - arrestin, beta 1, Plk1 - polo-like kinase 1, Tgfb2 - transforming growth factor, beta 2, Mtpn - myotrophin, Sema5a - sema domain, seven thrombospondin repeats (type 1 and type 1-like), transmembrane domain (tm) and short cytoplasmic domain, (semaphorin) 5a, Lif - leukemia inhibito…
GO:0009887	animal organ morphogenesis	4.8e-09	1.83e-06	2.71	17529	483	562	42	[Fancd2 - fanconi anemia, complementation group d2, Gsc - goosecoid homeobox, Sostdc1 - sclerostin domain containing 1, Nf1 - neurofibromin 1, Acp5 - acid phosphatase 5, tartrate resistant, Col5a1 - collagen, type v, alpha 1, Tgfb2 - transforming growth factor, beta 2, Recql4 - recq protein-like 4, Satb2 - satb homeobox 2, Chst11 - carbohydrate (chondroitin 4) sulfotransferase 11, Bglap - bone ga…
GO:0009611	response to wounding	6.61e-09	2.46e-06	3.45	17529	262	562	29	[Pllp - plasmolipin, Nf1 - neurofibromin 1, Gli1 - gli family zinc finger 1, Apod - apolipoprotein d, Sdc2 - syndecan 2, Ngfr - nerve growth factor receptor, Ets1 - v-ets avian erythroblastosis virus e26 oncogene homolog 1, Tgfb2 - transforming growth factor, beta 2, Timp1 - timp metallopeptidase inhibitor 1, Eng - endoglin, Gfap - glial fibrillary acidic protein, Ppard - peroxisome proliferator-…
GO:0040012	regulation of locomotion	6.69e-09	2.43e-06	2.21	17529	847	562	60	[Gli1 - gli family zinc finger 1, Apod - apolipoprotein d, Nf1 - neurofibromin 1, Sdc3 - syndecan 3, Rdx - radixin, Ets1 - v-ets avian erythroblastosis virus e26 oncogene homolog 1, Tgfb2 - transforming growth factor, beta 2, Arsb - arylsulfatase b, Nr2f2 - nuclear receptor subfamily 2, group f, member 2, Sema5a - sema domain, seven thrombospondin repeats (type 1 and type 1-like), transmembrane d…
GO:0022402	cell cycle process	6.82e-09	2.42e-06	2.43	17529	643	562	50	[Fancd2 - fanconi anemia, complementation group d2, Nfatc1 - nuclear factor of activated t-cells, cytoplasmic, calcineurin-dependent 1, Mybl2 - myeloblastosis oncogene-like 2, Bub1b - bub1 mitotic checkpoint serine/threonine kinase b, Chtf18 - ctf18, chromosome transmission fidelity factor 18 homolog (s. cerevisiae), Plk1 - polo-like kinase 1, Tgfb2 - transforming growth factor, beta 2, Dsn1 - ds…
GO:0051716	cellular response to stimulus	7.17e-09	2.49e-06	1.61	17529	2576	562	133	[Nf1 - neurofibromin 1, Rdx - radixin, Rc3h1 - ring finger and ccch-type domains 1, Mybl2 - myeloblastosis oncogene-like 2, Ddit4 - dna-damage-inducible transcript 4, Ngfr - nerve growth factor receptor, Acaca - acetyl-coa carboxylase alpha, Ercc2 - excision repair cross-complementing rodent repair deficiency, complementation group 2, Eya3 - eyes absent homolog 3 (drosophila), Mtpn - myotrophin, …
GO:0051240	positive regulation of multicellular organismal process	7.87e-09	2.67e-06	1.82	17529	1592	562	93	[Gli1 - gli family zinc finger 1, Nf1 - neurofibromin 1, Gpr37l1 - g protein-coupled receptor 37-like 1, Erg - v-ets avian erythroblastosis virus e26 oncogene, Ptgis - prostaglandin i2 (prostacyclin) synthase, Metrn - meteorin, glial cell differentiation regulator, Ngfr - nerve growth factor receptor, Ets1 - v-ets avian erythroblastosis virus e26 oncogene homolog 1, Tgfb2 - transforming growth fa…
GO:0051130	positive regulation of cellular component organization	8.74e-09	2.9e-06	1.98	17529	1180	562	75	[Tppp - tubulin polymerization promoting protein, Nf1 - neurofibromin 1, Metrn - meteorin, glial cell differentiation regulator, Jdp2 - jun dimerization protein 2, Ngfr - nerve growth factor receptor, Arrb1 - arrestin, beta 1, Tgfb2 - transforming growth factor, beta 2, Arsb - arylsulfatase b, Sema5a - sema domain, seven thrombospondin repeats (type 1 and type 1-like), transmembrane domain (tm) a…
GO:0051093	negative regulation of developmental process	9.95e-09	3.23e-06	2.14	17529	920	562	63	[Nf1 - neurofibromin 1, Sostdc1 - sclerostin domain containing 1, Gpr37l1 - g protein-coupled receptor 37-like 1, Nfatc1 - nuclear factor of activated t-cells, cytoplasmic, calcineurin-dependent 1, Rc3h1 - ring finger and ccch-type domains 1, Col5a1 - collagen, type v, alpha 1, Tjp2 - tight junction protein 2, Jdp2 - jun dimerization protein 2, Ctsz - cathepsin z, Ngfr - nerve growth factor recep…
GO:0070482	response to oxygen levels	1.11e-08	3.52e-06	2.8	17529	423	562	38	[Nf1 - neurofibromin 1, Ptgis - prostaglandin i2 (prostacyclin) synthase, Ddit4 - dna-damage-inducible transcript 4, Sdc2 - syndecan 2, Ets1 - v-ets avian erythroblastosis virus e26 oncogene homolog 1, Polg - polymerase (dna directed), gamma, Tgfb2 - transforming growth factor, beta 2, S100b - s100 calcium binding protein b, Ercc2 - excision repair cross-complementing rodent repair deficiency, co…
GO:0007155	cell adhesion	1.44e-08	4.49e-06	2.42	17529	618	562	48	[Lgals3bp - lectin, galactoside-binding, soluble, 3 binding protein, Sdc3 - syndecan 3, Hapln1 - hyaluronan and proteoglycan link protein 1, Lama4 - laminin, alpha 4, Ibsp - integrin-binding sialoprotein, Col5a1 - collagen, type v, alpha 1, Itga5 - integrin, alpha 5 (fibronectin receptor, alpha polypeptide), Tyro3 - tyro3 protein tyrosine kinase, Tgfb2 - transforming growth factor, beta 2, Cd2ap …
GO:0060707	trophoblast giant cell differentiation	2e-08	6.12e-06	14.68	17529	17	562	8	[Erf - ets2 repressor factor, Plk4 - polo-like kinase 4, E2f8 - e2f transcription factor 8, Nr2f2 - nuclear receptor subfamily 2, group f, member 2, Lif - leukemia inhibitory factor, Prdm1 - pr domain containing 1, with znf domain, Socs3 - suppressor of cytokine signaling 3, Snai1 - snail family zinc finger 1]
GO:0048729	tissue morphogenesis	2.13e-08	6.4e-06	2.83	17529	397	562	36	[Sostdc1 - sclerostin domain containing 1, Tbx18 - t-box18, Nfatc1 - nuclear factor of activated t-cells, cytoplasmic, calcineurin-dependent 1, Ctsz - cathepsin z, Tgfb2 - transforming growth factor, beta 2, Sema5a - sema domain, seven thrombospondin repeats (type 1 and type 1-like), transmembrane domain (tm) and short cytoplasmic domain, (semaphorin) 5a, Tgm2 - transglutaminase 2, c polypeptide,…
GO:0022610	biological adhesion	2.16e-08	6.34e-06	2.39	17529	626	562	48	[Lgals3bp - lectin, galactoside-binding, soluble, 3 binding protein, Sdc3 - syndecan 3, Hapln1 - hyaluronan and proteoglycan link protein 1, Lama4 - laminin, alpha 4, Ibsp - integrin-binding sialoprotein, Col5a1 - collagen, type v, alpha 1, Itga5 - integrin, alpha 5 (fibronectin receptor, alpha polypeptide), Tyro3 - tyro3 protein tyrosine kinase, Tgfb2 - transforming growth factor, beta 2, Cd2ap …
GO:0045596	negative regulation of cell differentiation	2.42e-08	6.98e-06	2.31	17529	689	562	51	[Nf1 - neurofibromin 1, Sostdc1 - sclerostin domain containing 1, Nfatc1 - nuclear factor of activated t-cells, cytoplasmic, calcineurin-dependent 1, Gpr37l1 - g protein-coupled receptor 37-like 1, Rc3h1 - ring finger and ccch-type domains 1, Col5a1 - collagen, type v, alpha 1, Jdp2 - jun dimerization protein 2, Ctsz - cathepsin z, Tjp2 - tight junction protein 2, Ngfr - nerve growth factor recep…
GO:0090068	positive regulation of cell cycle process	2.76e-08	7.8e-06	3.63	17529	215	562	25	[Gli1 - gli family zinc finger 1, Rdx - radixin, Cdc45 - cell division cycle 45, Cdc6 - cell division cycle 6, Cdc7 - cell division cycle 7, Ube2c - ubiquitin-conjugating enzyme e2c, E2f8 - e2f transcription factor 8, Dtl - denticleless e3 ubiquitin protein ligase homolog (drosophila), Cenpe - centromere protein e, Spag5 - sperm associated antigen 5, Rcc2 - regulator of chromosome condensation 2,…
GO:0048731	system development	3.33e-08	9.24e-06	2.44	17529	575	562	45	[Ttc21b - tetratricopeptide repeat domain 21b, Nf1 - neurofibromin 1, Tbx18 - t-box18, Hapln1 - hyaluronan and proteoglycan link protein 1, Nrn1 - neuritin 1, Ngfr - nerve growth factor receptor, Lhx2 - lim homeobox 2, Tgfb2 - transforming growth factor, beta 2, Taok1 - tao kinase 1, Recql4 - recq protein-like 4, Arsb - arylsulfatase b, Pcdhgb5 - protocadherin gamma subfamily b, 5, Ednrb - endoth…
GO:0001666	response to hypoxia	4.38e-08	1.19e-05	2.85	17529	372	562	34	[Nf1 - neurofibromin 1, Ptgis - prostaglandin i2 (prostacyclin) synthase, Ddit4 - dna-damage-inducible transcript 4, Sdc2 - syndecan 2, Ets1 - v-ets avian erythroblastosis virus e26 oncogene homolog 1, Tgfb2 - transforming growth factor, beta 2, S100b - s100 calcium binding protein b, Ercc2 - excision repair cross-complementing rodent repair deficiency, complementation group 2, Cox4i2 - cytochrom…
GO:0030335	positive regulation of cell migration	4.83e-08	1.29e-05	2.65	17529	447	562	38	[Dock5 - dedicator of cytokinesis 5, Gli1 - gli family zinc finger 1, Rdx - radixin, Acp5 - acid phosphatase 5, tartrate resistant, Itga5 - integrin, alpha 5 (fibronectin receptor, alpha polypeptide), Ets1 - v-ets avian erythroblastosis virus e26 oncogene homolog 1, Tgfb2 - transforming growth factor, beta 2, Itga4 - integrin, alpha 4, Sema5a - sema domain, seven thrombospondin repeats (type 1 an…
GO:0051988	regulation of attachment of spindle microtubules to kinetochore	4.87e-08	1.28e-05	16.79	17529	13	562	7	[Rcc2 - regulator of chromosome condensation 2, Ccnb1 - cyclin b1, Racgap1 - rac gtpase-activating protein 1, Ect2 - epithelial cell transforming sequence 2 oncogene, Cenpe - centromere protein e, Spag5 - sperm associated antigen 5, Knstrn - kinetochore-localized astrin/spag5 binding protein]
GO:0030198	extracellular matrix organization	6.1e-08	1.58e-05	4.02	17529	163	562	21	[Nf1 - neurofibromin 1, Ibsp - integrin-binding sialoprotein, Col5a1 - collagen, type v, alpha 1, Flrt2 - fibronectin leucine rich transmembrane protein 2, Vwa1 - von willebrand factor a domain containing 1, Foxc2 - forkhead box c2, Myo1e - myosin ie, Tgfb2 - transforming growth factor, beta 2, Ercc2 - excision repair cross-complementing rodent repair deficiency, complementation group 2, Mmp9 - m…
GO:0051241	negative regulation of multicellular organismal process	6.49e-08	1.65e-05	1.94	17529	1124	562	70	[Nf1 - neurofibromin 1, Apod - apolipoprotein d, Sostdc1 - sclerostin domain containing 1, Gpr37l1 - g protein-coupled receptor 37-like 1, Nfatc1 - nuclear factor of activated t-cells, cytoplasmic, calcineurin-dependent 1, Rc3h1 - ring finger and ccch-type domains 1, Col5a1 - collagen, type v, alpha 1, Tjp2 - tight junction protein 2, Ctsz - cathepsin z, Ngfr - nerve growth factor receptor, Arrb1…
GO:0043062	extracellular structure organization	6.79e-08	1.7e-05	3.99	17529	164	562	21	[Nf1 - neurofibromin 1, Ibsp - integrin-binding sialoprotein, Col5a1 - collagen, type v, alpha 1, Flrt2 - fibronectin leucine rich transmembrane protein 2, Vwa1 - von willebrand factor a domain containing 1, Foxc2 - forkhead box c2, Myo1e - myosin ie, Tgfb2 - transforming growth factor, beta 2, Ercc2 - excision repair cross-complementing rodent repair deficiency, complementation group 2, Mmp9 - m…
GO:0009628	response to abiotic stimulus	8.39e-08	2.07e-05	1.88	17529	1246	562	75	[Fancd2 - fanconi anemia, complementation group d2, Nf1 - neurofibromin 1, Ptgis - prostaglandin i2 (prostacyclin) synthase, Ddit4 - dna-damage-inducible transcript 4, Ngfr - nerve growth factor receptor, Polg - polymerase (dna directed), gamma, Ets1 - v-ets avian erythroblastosis virus e26 oncogene homolog 1, Arrb1 - arrestin, beta 1, Tgfb2 - transforming growth factor, beta 2, Arsb - arylsulfat…
GO:0048646	anatomical structure formation involved in morphogenesis	8.44e-08	2.05e-05	2.26	17529	675	562	49	[Dusp4 - dual specificity phosphatase 4, Nfatc1 - nuclear factor of activated t-cells, cytoplasmic, calcineurin-dependent 1, Esm1 - endothelial cell-specific molecule 1, Actn1 - actinin, alpha 1, Ets1 - v-ets avian erythroblastosis virus e26 oncogene homolog 1, Lhx2 - lim homeobox 2, Tgfb2 - transforming growth factor, beta 2, Kctd10 - potassium channel tetramerization domain containing 10, Ercc2…
GO:0036293	response to decreased oxygen levels	1.01e-07	2.4e-05	2.75	17529	385	562	34	[Nf1 - neurofibromin 1, Ptgis - prostaglandin i2 (prostacyclin) synthase, Ddit4 - dna-damage-inducible transcript 4, Sdc2 - syndecan 2, Ets1 - v-ets avian erythroblastosis virus e26 oncogene homolog 1, Tgfb2 - transforming growth factor, beta 2, S100b - s100 calcium binding protein b, Ercc2 - excision repair cross-complementing rodent repair deficiency, complementation group 2, Cox4i2 - cytochrom…
GO:0060284	regulation of cell development	1.25e-07	2.93e-05	2.02	17529	941	562	61	[Nf1 - neurofibromin 1, Gpr37l1 - g protein-coupled receptor 37-like 1, Metrn - meteorin, glial cell differentiation regulator, Tjp2 - tight junction protein 2, Ctsz - cathepsin z, Ngfr - nerve growth factor receptor, Arsb - arylsulfatase b, Ednrb - endothelin receptor type b, Sema5a - sema domain, seven thrombospondin repeats (type 1 and type 1-like), transmembrane domain (tm) and short cytoplas…
GO:2000147	positive regulation of cell motility	1.27e-07	2.95e-05	2.55	17529	464	562	38	[Dock5 - dedicator of cytokinesis 5, Gli1 - gli family zinc finger 1, Rdx - radixin, Acp5 - acid phosphatase 5, tartrate resistant, Itga5 - integrin, alpha 5 (fibronectin receptor, alpha polypeptide), Ets1 - v-ets avian erythroblastosis virus e26 oncogene homolog 1, Tgfb2 - transforming growth factor, beta 2, Itga4 - integrin, alpha 4, Sema5a - sema domain, seven thrombospondin repeats (type 1 an…
GO:0031344	regulation of cell projection organization	2.04e-07	4.65e-05	2.22	17529	674	562	48	[Nf1 - neurofibromin 1, Rdx - radixin, Myo10 - myosin x, Rap1gap - rap1 gtpase-activating protein, Metrn - meteorin, glial cell differentiation regulator, Ctsz - cathepsin z, Sdc2 - syndecan 2, Ngfr - nerve growth factor receptor, Coro1c - coronin, actin binding protein 1c, Shank1 - sh3 and multiple ankyrin repeat domains 1, Arsb - arylsulfatase b, Sema5a - sema domain, seven thrombospondin repea…
GO:0001525	angiogenesis	2.28e-07	5.12e-05	3.47	17529	207	562	23	[Esm1 - endothelial cell-specific molecule 1, Angptl4 - angiopoietin-like 4, Ets1 - v-ets avian erythroblastosis virus e26 oncogene homolog 1, Kctd10 - potassium channel tetramerization domain containing 10, Enpep - glutamyl aminopeptidase, Clic4 - chloride intracellular channel 4, Flna - filamin a, alpha, Ncl - nucleolin, Nrp2 - neuropilin 2, Cyp1b1 - cytochrome p450, family 1, subfamily b, poly…
GO:0051129	negative regulation of cellular component organization	2.38e-07	5.27e-05	2.26	17529	636	562	46	[Tom1l1 - target of myb1 (chicken)-like 1, Apod - apolipoprotein d, Rdx - radixin, Bub1b - bub1 mitotic checkpoint serine/threonine kinase b, Atad2 - atpase family, aaa domain containing 2, Hnrnpa1 - heterogeneous nuclear ribonucleoprotein a1, Rap1gap - rap1 gtpase-activating protein, Ctsz - cathepsin z, Ngfr - nerve growth factor receptor, Plk1 - polo-like kinase 1, Coro1c - coronin, actin bindi…
GO:0065007	biological regulation	2.67e-07	5.82e-05	1.16	17529	11116	562	412	[Dusp4 - dual specificity phosphatase 4, Gsc - goosecoid homeobox, Srpk1 - srsf protein kinase 1, Raph1 - ras association (ralgds/af-6) and pleckstrin homology domains 1, Birc6 - baculoviral iap repeat-containing 6, Unc5b - unc-5 homolog b (c. elegans), Lat2 - linker for activation of t cells family, member 2, Creb5 - camp responsive element binding protein 5, Acaca - acetyl-coa carboxylase alpha…
GO:0051272	positive regulation of cellular component movement	2.71e-07	5.84e-05	2.48	17529	478	562	38	[Dock5 - dedicator of cytokinesis 5, Gli1 - gli family zinc finger 1, Rdx - radixin, Acp5 - acid phosphatase 5, tartrate resistant, Itga5 - integrin, alpha 5 (fibronectin receptor, alpha polypeptide), Ets1 - v-ets avian erythroblastosis virus e26 oncogene homolog 1, Tgfb2 - transforming growth factor, beta 2, Itga4 - integrin, alpha 4, Sema5a - sema domain, seven thrombospondin repeats (type 1 an…
GO:0071396	cellular response to lipid	2.86e-07	6.07e-05	2.47	17529	479	562	38	[Nf1 - neurofibromin 1, Hnrnpa1 - heterogeneous nuclear ribonucleoprotein a1, Ddit4 - dna-damage-inducible transcript 4, Acaca - acetyl-coa carboxylase alpha, Ednrb - endothelin receptor type b, Ncl - nucleolin, Bglap - bone gamma-carboxyglutamate (gla) protein, Cyp1b1 - cytochrome p450, family 1, subfamily b, polypeptide 1, Wnt7b - wingless-type mmtv integration site family, member 7b, Ctsg - ca…
GO:0033993	response to lipid	2.96e-07	6.2e-05	1.92	17529	1055	562	65	[Nf1 - neurofibromin 1, Ddit4 - dna-damage-inducible transcript 4, Ngfr - nerve growth factor receptor, Ets1 - v-ets avian erythroblastosis virus e26 oncogene homolog 1, Tgfb2 - transforming growth factor, beta 2, Acaca - acetyl-coa carboxylase alpha, Nr2f2 - nuclear receptor subfamily 2, group f, member 2, Ednrb - endothelin receptor type b, Wnt7b - wingless-type mmtv integration site family, me…
GO:0001763	morphogenesis of a branching structure	3.37e-07	6.96e-05	3.64	17529	180	562	21	[Wnt5a - wingless-type mmtv integration site family, member 5a, Fat4 - fat atypical cadherin 4, Rdh10 - retinol dehydrogenase 10 (all-trans), Nfatc1 - nuclear factor of activated t-cells, cytoplasmic, calcineurin-dependent 1, Ctsz - cathepsin z, Foxc2 - forkhead box c2, Clic4 - chloride intracellular channel 4, Pml - promyelocytic leukemia, Smad4 - smad family member 4, Sema5a - sema domain, seve…
GO:0070887	cellular response to chemical stimulus	3.44e-07	7.02e-05	1.68	17529	1725	562	93	[Fancd2 - fanconi anemia, complementation group d2, Nf1 - neurofibromin 1, Rdx - radixin, Mybl2 - myeloblastosis oncogene-like 2, Rc3h1 - ring finger and ccch-type domains 1, Ptgis - prostaglandin i2 (prostacyclin) synthase, Ddit4 - dna-damage-inducible transcript 4, Ngfr - nerve growth factor receptor, Polg - polymerase (dna directed), gamma, Ets1 - v-ets avian erythroblastosis virus e26 oncogen…
GO:0009719	response to endogenous stimulus	3.96e-07	7.97e-05	1.79	17529	1343	562	77	[Nf1 - neurofibromin 1, Rdx - radixin, Ddit4 - dna-damage-inducible transcript 4, Ngfr - nerve growth factor receptor, Ets1 - v-ets avian erythroblastosis virus e26 oncogene homolog 1, Tgfb2 - transforming growth factor, beta 2, Acaca - acetyl-coa carboxylase alpha, Nr2f2 - nuclear receptor subfamily 2, group f, member 2, Wnt7b - wingless-type mmtv integration site family, member 7b, Eng - endogl…
GO:0000226	microtubule cytoskeleton organization	4.67e-07	9.28e-05	2.98	17529	283	562	27	[Tppp - tubulin polymerization promoting protein, Mybl2 - myeloblastosis oncogene-like 2, Rcc1 - regulator of chromosome condensation 1, Plk1 - polo-like kinase 1, Eml1 - echinoderm microtubule associated protein like 1, Gas8 - growth arrest specific 8, Stil - scl/tal1 interrupting locus, Cenpe - centromere protein e, Kif2c - kinesin family member 2c, Spag5 - sperm associated antigen 5, Fbxo5 - f…
GO:0006270	DNA replication initiation	4.96e-07	9.73e-05	10.4	17529	24	562	8	[Ccne1 - cyclin e1, Mcm6 - minichromosome maintenance complex component 6, Cdc7 - cell division cycle 7, Cdc45 - cell division cycle 45, Mcm5 - minichromosome maintenance complex component 5, Mcm10 - minichromosome maintenance complex component 10, Mcm3 - minichromosome maintenance complex component 3, Cdc6 - cell division cycle 6]
GO:0007411	axon guidance	5.09e-07	9.84e-05	3.69	17529	169	562	20	[Efnb1 - ephrin b1, Wnt5a - wingless-type mmtv integration site family, member 5a, Efna2 - ephrin a2, Slit3 - slit homolog 3 (drosophila), Flrt2 - fibronectin leucine rich transmembrane protein 2, Crmp1 - collapsin response mediator protein 1, Unc5b - unc-5 homolog b (c. elegans), Ngfr - nerve growth factor receptor, Lhx2 - lim homeobox 2, Tgfb2 - transforming growth factor, beta 2, Smad4 - smad …
GO:0061138	morphogenesis of a branching epithelium	5.6e-07	0.000107	3.67	17529	170	562	20	[Wnt5a - wingless-type mmtv integration site family, member 5a, Fat4 - fat atypical cadherin 4, Rdh10 - retinol dehydrogenase 10 (all-trans), Nfatc1 - nuclear factor of activated t-cells, cytoplasmic, calcineurin-dependent 1, Ctsz - cathepsin z, Foxc2 - forkhead box c2, Clic4 - chloride intracellular channel 4, Pml - promyelocytic leukemia, Smad4 - smad family member 4, Sema5a - sema domain, seve…
GO:0097485	neuron projection guidance	6.15e-07	0.000116	3.65	17529	171	562	20	[Efnb1 - ephrin b1, Wnt5a - wingless-type mmtv integration site family, member 5a, Efna2 - ephrin a2, Slit3 - slit homolog 3 (drosophila), Flrt2 - fibronectin leucine rich transmembrane protein 2, Crmp1 - collapsin response mediator protein 1, Unc5b - unc-5 homolog b (c. elegans), Ngfr - nerve growth factor receptor, Lhx2 - lim homeobox 2, Tgfb2 - transforming growth factor, beta 2, Smad4 - smad …
GO:0040017	positive regulation of locomotion	6.17e-07	0.000115	2.4	17529	494	562	38	[Dock5 - dedicator of cytokinesis 5, Gli1 - gli family zinc finger 1, Rdx - radixin, Acp5 - acid phosphatase 5, tartrate resistant, Itga5 - integrin, alpha 5 (fibronectin receptor, alpha polypeptide), Ets1 - v-ets avian erythroblastosis virus e26 oncogene homolog 1, Tgfb2 - transforming growth factor, beta 2, Itga4 - integrin, alpha 4, Sema5a - sema domain, seven thrombospondin repeats (type 1 an…
GO:0098813	nuclear chromosome segregation	6.51e-07	0.00012	8.51	17529	33	562	9	[Smc4 - structural maintenance of chromosomes 4, Dsn1 - dsn1, mis12 kinetochore complex component, Pttg1 - pituitary tumor-transforming 1, Nusap1 - nucleolar and spindle associated protein 1, Plk1 - polo-like kinase 1, Ino80 - ino80 homolog (s. cerevisiae), Top2a - topoisomerase (dna) ii alpha, Knstrn - kinetochore-localized astrin/spag5 binding protein, Spag5 - sperm associated antigen 5]
GO:0050678	regulation of epithelial cell proliferation	6.71e-07	0.000122	2.79	17529	324	562	29	[Nf1 - neurofibromin 1, Gli1 - gli family zinc finger 1, Tbx18 - t-box18, Rap1gap - rap1 gtpase-activating protein, Ngfr - nerve growth factor receptor, Tgfb2 - transforming growth factor, beta 2, Nr2f2 - nuclear receptor subfamily 2, group f, member 2, Ednrb - endothelin receptor type b, Sema5a - sema domain, seven thrombospondin repeats (type 1 and type 1-like), transmembrane domain (tm) and sh…
GO:0009968	negative regulation of signal transduction	7.45e-07	0.000134	1.88	17529	1060	562	64	[Dusp4 - dual specificity phosphatase 4, Gsc - goosecoid homeobox, Gli1 - gli family zinc finger 1, Apod - apolipoprotein d, Sostdc1 - sclerostin domain containing 1, Nf1 - neurofibromin 1, Gpr37l1 - g protein-coupled receptor 37-like 1, Birc6 - baculoviral iap repeat-containing 6, Ddit4 - dna-damage-inducible transcript 4, Unc5b - unc-5 homolog b (c. elegans), Ngfr - nerve growth factor receptor…
GO:0002009	morphogenesis of an epithelium	7.61e-07	0.000135	2.77	17529	326	562	29	[Sostdc1 - sclerostin domain containing 1, Tbx18 - t-box18, Nfatc1 - nuclear factor of activated t-cells, cytoplasmic, calcineurin-dependent 1, Ctsz - cathepsin z, Sema5a - sema domain, seven thrombospondin repeats (type 1 and type 1-like), transmembrane domain (tm) and short cytoplasmic domain, (semaphorin) 5a, Tgm2 - transglutaminase 2, c polypeptide, Eng - endoglin, Hey1 - hairy/enhancer-of-sp…
GO:0022414	reproductive process	7.92e-07	0.000139	1.76	17529	1367	562	77	[Fancd2 - fanconi anemia, complementation group d2, Gli1 - gli family zinc finger 1, Sostdc1 - sclerostin domain containing 1, Pbrm1 - polybromo 1, Bub1b - bub1 mitotic checkpoint serine/threonine kinase b, Ptgis - prostaglandin i2 (prostacyclin) synthase, Birc6 - baculoviral iap repeat-containing 6, Tyro3 - tyro3 protein tyrosine kinase, Chtf18 - ctf18, chromosome transmission fidelity factor 18…
GO:0048585	negative regulation of response to stimulus	7.92e-07	0.000138	1.75	17529	1391	562	78	[Dusp4 - dual specificity phosphatase 4, Gsc - goosecoid homeobox, Gli1 - gli family zinc finger 1, Nf1 - neurofibromin 1, Apod - apolipoprotein d, Sostdc1 - sclerostin domain containing 1, Gpr37l1 - g protein-coupled receptor 37-like 1, Rc3h1 - ring finger and ccch-type domains 1, Ptgis - prostaglandin i2 (prostacyclin) synthase, Birc6 - baculoviral iap repeat-containing 6, Ddit4 - dna-damage-in…
GO:0120035	regulation of plasma membrane bounded cell projection organization	8.36e-07	0.000144	2.16	17529	665	562	46	[Nf1 - neurofibromin 1, Rdx - radixin, Myo10 - myosin x, Rap1gap - rap1 gtpase-activating protein, Metrn - meteorin, glial cell differentiation regulator, Ctsz - cathepsin z, Sdc2 - syndecan 2, Ngfr - nerve growth factor receptor, Coro1c - coronin, actin binding protein 1c, Shank1 - sh3 and multiple ankyrin repeat domains 1, Arsb - arylsulfatase b, Sema5a - sema domain, seven thrombospondin repea…
GO:0007051	spindle organization	8.59e-07	0.000146	4.59	17529	102	562	15	[Mybl2 - myeloblastosis oncogene-like 2, Fbxo5 - f-box protein 5, Rcc1 - regulator of chromosome condensation 1, Ezr - ezrin, Ino80 - ino80 homolog (s. cerevisiae), Flna - filamin a, alpha, Poc1a - poc1 centriolar protein homolog a (chlamydomonas), Eml1 - echinoderm microtubule associated protein like 1, Birc5 - baculoviral iap repeat-containing 5, Ccnb1 - cyclin b1, Stil - scl/tal1 interrupting …
GO:0071103	DNA conformation change	1.14e-06	0.000191	4.8	17529	91	562	14	[Mcm6 - minichromosome maintenance complex component 6, Brip1 - brca1 interacting protein c-terminal helicase 1, Gtf2h4 - general transcription factor ii h, polypeptide 4, Cdc45 - cell division cycle 45, Hnrnpa1 - heterogeneous nuclear ribonucleoprotein a1, Rad54l - rad54 like (s. cerevisiae), Recql4 - recq protein-like 4, Ercc2 - excision repair cross-complementing rodent repair deficiency, comp…
GO:0006950	response to stress	1.19e-06	0.000197	1.5	17529	2597	562	125	[Gli1 - gli family zinc finger 1, Nf1 - neurofibromin 1, Ddit4 - dna-damage-inducible transcript 4, Ngfr - nerve growth factor receptor, Tgfb2 - transforming growth factor, beta 2, Tspan2 - tetraspanin 2, Ercc2 - excision repair cross-complementing rodent repair deficiency, complementation group 2, Eya3 - eyes absent homolog 3 (drosophila), Fstl1 - follistatin-like 1, Oas1a - 2'-5' oligoadenylate…
GO:0034330	cell junction organization	1.54e-06	0.000252	3.74	17529	150	562	18	[Rcc2 - regulator of chromosome condensation 2, Actn1 - actinin, alpha 1, Itga5 - integrin, alpha 5 (fibronectin receptor, alpha polypeptide), Ect2 - epithelial cell transforming sequence 2 oncogene, Tgfb2 - transforming growth factor, beta 2, Fscn1 - fascin homolog 1, actin bundling protein (strongylocentrotus purpuratus), Flna - filamin a, alpha, Ugt8 - udp glycosyltransferase 8, Shroom2 - shro…
GO:0045787	positive regulation of cell cycle	1.64e-06	0.000266	2.73	17529	320	562	28	[Gli1 - gli family zinc finger 1, Rdx - radixin, Cdc45 - cell division cycle 45, Tgfb2 - transforming growth factor, beta 2, Cdc6 - cell division cycle 6, Cdc7 - cell division cycle 7, Ube2c - ubiquitin-conjugating enzyme e2c, Src - v-src avian sarcoma (schmidt-ruppin a-2) viral oncogene homolog, Stil - scl/tal1 interrupting locus, E2f8 - e2f transcription factor 8, Dtl - denticleless e3 ubiquiti…
GO:0010632	regulation of epithelial cell migration	1.66e-06	0.000267	3.43	17529	182	562	20	[Dock5 - dedicator of cytokinesis 5, Wnt5a - wingless-type mmtv integration site family, member 5a, Nf1 - neurofibromin 1, RGD1562037 - similar to otthump00000046255, Foxc2 - forkhead box c2, Ets1 - v-ets avian erythroblastosis virus e26 oncogene homolog 1, Coro1c - coronin, actin binding protein 1c, Tgfb2 - transforming growth factor, beta 2, Arsb - arylsulfatase b, Nr2f2 - nuclear receptor subf…
GO:0060706	cell differentiation involved in embryonic placenta development	1.87e-06	0.000298	8.91	17529	28	562	8	[Erf - ets2 repressor factor, Plk4 - polo-like kinase 4, E2f8 - e2f transcription factor 8, Nr2f2 - nuclear receptor subfamily 2, group f, member 2, Lif - leukemia inhibitory factor, Socs3 - suppressor of cytokine signaling 3, Snai1 - snail family zinc finger 1, Prdm1 - pr domain containing 1, with znf domain]
GO:0032879	regulation of localization	1.88e-06	0.000296	1.49	17529	2567	562	123	[Gli1 - gli family zinc finger 1, Sdc3 - syndecan 3, Nf1 - neurofibromin 1, Rdx - radixin, Ngfr - nerve growth factor receptor, Arrb1 - arrestin, beta 1, Tgfb2 - transforming growth factor, beta 2, Nr2f2 - nuclear receptor subfamily 2, group f, member 2, Sema5a - sema domain, seven thrombospondin repeats (type 1 and type 1-like), transmembrane domain (tm) and short cytoplasmic domain, (semaphorin…
GO:0050789	regulation of biological process	1.91e-06	0.000298	1.16	17529	10527	562	390	[Dusp4 - dual specificity phosphatase 4, Gsc - goosecoid homeobox, Srpk1 - srsf protein kinase 1, Birc6 - baculoviral iap repeat-containing 6, Raph1 - ras association (ralgds/af-6) and pleckstrin homology domains 1, Unc5b - unc-5 homolog b (c. elegans), Lat2 - linker for activation of t cells family, member 2, Creb5 - camp responsive element binding protein 5, Lif - leukemia inhibitory factor, Kh…
GO:0007017	microtubule-based process	2.29e-06	0.000353	2.3	17529	501	562	37	[Tppp - tubulin polymerization promoting protein, Ttc21b - tetratricopeptide repeat domain 21b, Mybl2 - myeloblastosis oncogene-like 2, Rcc1 - regulator of chromosome condensation 1, Plk1 - polo-like kinase 1, Arhgap21 - rho gtpase activating protein 21, Eml1 - echinoderm microtubule associated protein like 1, Gas8 - growth arrest specific 8, Stil - scl/tal1 interrupting locus, Mgarp - mitochondr…
GO:0001837	epithelial to mesenchymal transition	2.31e-06	0.000353	5.82	17529	59	562	11	[Wnt5a - wingless-type mmtv integration site family, member 5a, Nfatc1 - nuclear factor of activated t-cells, cytoplasmic, calcineurin-dependent 1, Eng - endoglin, Erg - v-ets avian erythroblastosis virus e26 oncogene, Gsk3b - glycogen synthase kinase 3 beta, Hey1 - hairy/enhancer-of-split related with yrpw motif 1, Tgfb2 - transforming growth factor, beta 2, Flna - filamin a, alpha, Snai2 - snai…
GO:0071310	cellular response to organic substance	2.45e-06	0.000371	1.69	17529	1457	562	79	[Nf1 - neurofibromin 1, Rdx - radixin, Mybl2 - myeloblastosis oncogene-like 2, Rc3h1 - ring finger and ccch-type domains 1, Ptgis - prostaglandin i2 (prostacyclin) synthase, Ddit4 - dna-damage-inducible transcript 4, Ngfr - nerve growth factor receptor, Polg - polymerase (dna directed), gamma, Acaca - acetyl-coa carboxylase alpha, Trim2 - tripartite motif-containing 2, Ednrb - endothelin receptor…
GO:0048468	cell development	2.68e-06	0.000401	2.07	17529	694	562	46	[Nf1 - neurofibromin 1, Rdx - radixin, Actn1 - actinin, alpha 1, Dhh - desert hedgehog, Tjp2 - tight junction protein 2, Tgfb2 - transforming growth factor, beta 2, Tspan2 - tetraspanin 2, Satb2 - satb homeobox 2, Chst11 - carbohydrate (chondroitin 4) sulfotransferase 11, Bglap - bone gamma-carboxyglutamate (gla) protein, Lif - leukemia inhibitory factor, Runx2 - runt-related transcription factor…
GO:0010634	positive regulation of epithelial cell migration	2.88e-06	0.000427	4.18	17529	112	562	15	[Dock5 - dedicator of cytokinesis 5, Wnt5a - wingless-type mmtv integration site family, member 5a, RGD1562037 - similar to otthump00000046255, Foxc2 - forkhead box c2, Ets1 - v-ets avian erythroblastosis virus e26 oncogene homolog 1, Tgfb2 - transforming growth factor, beta 2, Sema5a - sema domain, seven thrombospondin repeats (type 1 and type 1-like), transmembrane domain (tm) and short cytopla…
GO:0060560	developmental growth involved in morphogenesis	2.88e-06	0.000423	4.18	17529	112	562	15	[Wnt5a - wingless-type mmtv integration site family, member 5a, Yap1 - yes-associated protein 1, Slit3 - slit homolog 3 (drosophila), Rdh10 - retinol dehydrogenase 10 (all-trans), Raph1 - ras association (ralgds/af-6) and pleckstrin homology domains 1, Nrn1 - neuritin 1, Lhx2 - lim homeobox 2, Sema5a - sema domain, seven thrombospondin repeats (type 1 and type 1-like), transmembrane domain (tm) a…
GO:0007229	integrin-mediated signaling pathway	2.94e-06	0.000427	4.77	17529	85	562	13	[Lat - linker for activation of t cells, Rcc2 - regulator of chromosome condensation 2, Ibsp - integrin-binding sialoprotein, Itga5 - integrin, alpha 5 (fibronectin receptor, alpha polypeptide), Plp1 - proteolipid protein 1, Itga4 - integrin, alpha 4, Itga10 - integrin, alpha 10, Itgb8 - integrin, beta 8, Sema7a - semaphorin 7a, gpi membrane anchor, Thy1 - thy-1 cell surface antigen, Itgb3 - inte…
GO:0045785	positive regulation of cell adhesion	3e-06	0.000433	2.54	17529	368	562	30	[Dock5 - dedicator of cytokinesis 5, Tbx18 - t-box18, Ibsp - integrin-binding sialoprotein, Myo10 - myosin x, Rap1gap - rap1 gtpase-activating protein, Itga5 - integrin, alpha 5 (fibronectin receptor, alpha polypeptide), Ets1 - v-ets avian erythroblastosis virus e26 oncogene homolog 1, Tgfb2 - transforming growth factor, beta 2, Itga4 - integrin, alpha 4, Tgm2 - transglutaminase 2, c polypeptide,…
GO:0031960	response to corticosteroid	3.16e-06	0.000452	2.76	17529	294	562	26	[Nf1 - neurofibromin 1, Ddit4 - dna-damage-inducible transcript 4, S100b - s100 calcium binding protein b, Bglap - bone gamma-carboxyglutamate (gla) protein, Cyp1b1 - cytochrome p450, family 1, subfamily b, polypeptide 1, Eng - endoglin, Wnt7b - wingless-type mmtv integration site family, member 7b, Hey1 - hairy/enhancer-of-split related with yrpw motif 1, L1cam - l1 cell adhesion molecule, Src -…
GO:0010721	negative regulation of cell development	3.35e-06	0.000474	2.63	17529	332	562	28	[Nf1 - neurofibromin 1, Gpr37l1 - g protein-coupled receptor 37-like 1, Rap1gap - rap1 gtpase-activating protein, Tjp2 - tight junction protein 2, Ctsz - cathepsin z, Ngfr - nerve growth factor receptor, Coro1c - coronin, actin binding protein 1c, Ednrb - endothelin receptor type b, Sema5a - sema domain, seven thrombospondin repeats (type 1 and type 1-like), transmembrane domain (tm) and short cy…
GO:0031589	cell-substrate adhesion	3.4e-06	0.000477	3.9	17529	128	562	16	[Itga5 - integrin, alpha 5 (fibronectin receptor, alpha polypeptide), Tyro3 - tyro3 protein tyrosine kinase, Ttyh1 - tweety homolog 1 (drosophila), Itga10 - integrin, alpha 10, Itga4 - integrin, alpha 4, Itgb8 - integrin, beta 8, Col5a3 - collagen, type v, alpha 3, Angpt1 - angiopoietin 1, Tnn - tenascin n, L1cam - l1 cell adhesion molecule, Itgb3 - integrin, beta 3, Src - v-src avian sarcoma (sc…
GO:0007162	negative regulation of cell adhesion	3.52e-06	0.000489	2.96	17529	242	562	23	[Ptpn22 - protein tyrosine phosphatase, non-receptor type 22 (lymphoid), Rcc2 - regulator of chromosome condensation 2, Apod - apolipoprotein d, Nf1 - neurofibromin 1, Rdx - radixin, Rc3h1 - ring finger and ccch-type domains 1, Acp5 - acid phosphatase 5, tartrate resistant, Coro1c - coronin, actin binding protein 1c, Snai2 - snail family zinc finger 2, Sema5a - sema domain, seven thrombospondin r…
GO:0050794	regulation of cellular process	3.8e-06	0.000524	1.16	17529	10025	562	373	[Gsc - goosecoid homeobox, Dusp4 - dual specificity phosphatase 4, Sdc3 - syndecan 3, Srpk1 - srsf protein kinase 1, Rdx - radixin, Gpr37l1 - g protein-coupled receptor 37-like 1, Rc3h1 - ring finger and ccch-type domains 1, Mybl2 - myeloblastosis oncogene-like 2, Raph1 - ras association (ralgds/af-6) and pleckstrin homology domains 1, Birc6 - baculoviral iap repeat-containing 6, Jdp2 - jun dimer…
GO:0033044	regulation of chromosome organization	4.3e-06	0.000588	2.71	17529	299	562	26	[Bub1b - bub1 mitotic checkpoint serine/threonine kinase b, Cdc45 - cell division cycle 45, Hnrnpa1 - heterogeneous nuclear ribonucleoprotein a1, Atad2 - atpase family, aaa domain containing 2, Jdp2 - jun dimerization protein 2, Arrb1 - arrestin, beta 1, Plk1 - polo-like kinase 1, Recql4 - recq protein-like 4, Supt6h - suppressor of ty 6 homolog (s. cerevisiae), Lif - leukemia inhibitory factor, …
GO:0048545	response to steroid hormone	4.38e-06	0.000593	2.5	17529	375	562	30	[Nf1 - neurofibromin 1, Ddit4 - dna-damage-inducible transcript 4, Tgfb2 - transforming growth factor, beta 2, S100b - s100 calcium binding protein b, Bglap - bone gamma-carboxyglutamate (gla) protein, Cyp1b1 - cytochrome p450, family 1, subfamily b, polypeptide 1, Eng - endoglin, Wnt7b - wingless-type mmtv integration site family, member 7b, Hey1 - hairy/enhancer-of-split related with yrpw motif…
GO:0023051	regulation of signaling	5.12e-06	0.000687	1.43	17529	2968	562	136	[Gsc - goosecoid homeobox, Dusp4 - dual specificity phosphatase 4, Gli1 - gli family zinc finger 1, Nf1 - neurofibromin 1, Gpr37l1 - g protein-coupled receptor 37-like 1, Rc3h1 - ring finger and ccch-type domains 1, Esm1 - endothelial cell-specific molecule 1, Ddit4 - dna-damage-inducible transcript 4, Birc6 - baculoviral iap repeat-containing 6, Ngfr - nerve growth factor receptor, Unc5b - unc-5…
GO:0008366	axon ensheathment	5.77e-06	0.000766	4.86	17529	77	562	12	[Pllp - plasmolipin, Nf1 - neurofibromin 1, Mpz - myelin protein zero, Kel - kell blood group, metallo-endopeptidase, Dhh - desert hedgehog, Prx - periaxin, Plp1 - proteolipid protein 1, Tspan2 - tetraspanin 2, Ugt8 - udp glycosyltransferase 8, Ppard - peroxisome proliferator-activated receptor delta, Mbp - myelin basic protein, Sox10 - sry (sex determining region y)-box 10]
GO:0007272	ensheathment of neurons	5.77e-06	0.00076	4.86	17529	77	562	12	[Pllp - plasmolipin, Nf1 - neurofibromin 1, Mpz - myelin protein zero, Kel - kell blood group, metallo-endopeptidase, Dhh - desert hedgehog, Prx - periaxin, Plp1 - proteolipid protein 1, Tspan2 - tetraspanin 2, Ugt8 - udp glycosyltransferase 8, Ppard - peroxisome proliferator-activated receptor delta, Mbp - myelin basic protein, Sox10 - sry (sex determining region y)-box 10]
GO:0009966	regulation of signal transduction	5.77e-06	0.000753	1.46	17529	2625	562	123	[Gsc - goosecoid homeobox, Dusp4 - dual specificity phosphatase 4, Gli1 - gli family zinc finger 1, Nf1 - neurofibromin 1, Gpr37l1 - g protein-coupled receptor 37-like 1, Rc3h1 - ring finger and ccch-type domains 1, Esm1 - endothelial cell-specific molecule 1, Ddit4 - dna-damage-inducible transcript 4, Birc6 - baculoviral iap repeat-containing 6, Ngfr - nerve growth factor receptor, Unc5b - unc-5…
GO:0048583	regulation of response to stimulus	5.8e-06	0.000751	1.4	17529	3330	562	149	[Gsc - goosecoid homeobox, Dusp4 - dual specificity phosphatase 4, Nf1 - neurofibromin 1, Gli1 - gli family zinc finger 1, Gpr37l1 - g protein-coupled receptor 37-like 1, Rc3h1 - ring finger and ccch-type domains 1, Esm1 - endothelial cell-specific molecule 1, Ddit4 - dna-damage-inducible transcript 4, Birc6 - baculoviral iap repeat-containing 6, Lat2 - linker for activation of t cells family, me…
GO:0032392	DNA geometric change	5.97e-06	0.000766	5.88	17529	53	562	10	[Brip1 - brca1 interacting protein c-terminal helicase 1, Mcm6 - minichromosome maintenance complex component 6, Gtf2h4 - general transcription factor ii h, polypeptide 4, Cdc45 - cell division cycle 45, Hnrnpa1 - heterogeneous nuclear ribonucleoprotein a1, Mcm5 - minichromosome maintenance complex component 5, Rad54l - rad54 like (s. cerevisiae), Recql4 - recq protein-like 4, Ino80 - ino80 homol…
GO:0045216	cell-cell junction organization	6.21e-06	0.000791	3.72	17529	134	562	16	[Rcc2 - regulator of chromosome condensation 2, Actn1 - actinin, alpha 1, Ect2 - epithelial cell transforming sequence 2 oncogene, Tgfb2 - transforming growth factor, beta 2, Fscn1 - fascin homolog 1, actin bundling protein (strongylocentrotus purpuratus), Flna - filamin a, alpha, Ugt8 - udp glycosyltransferase 8, Shroom2 - shroom family member 2, Snai2 - snail family zinc finger 2, Cdh1 - cadher…
GO:0010033	response to organic substance	6.4e-06	0.000808	1.47	17529	2524	562	119	[Nf1 - neurofibromin 1, Rdx - radixin, Rc3h1 - ring finger and ccch-type domains 1, Mybl2 - myeloblastosis oncogene-like 2, Ddit4 - dna-damage-inducible transcript 4, Ngfr - nerve growth factor receptor, Tgfb2 - transforming growth factor, beta 2, Acaca - acetyl-coa carboxylase alpha, Nr2f2 - nuclear receptor subfamily 2, group f, member 2, Khsrp - kh-type splicing regulatory protein, Col6a1 - co…
GO:0051783	regulation of nuclear division	6.59e-06	0.000825	3.38	17529	166	562	18	[Wnt5a - wingless-type mmtv integration site family, member 5a, Tom1l1 - target of myb1 (chicken)-like 1, Bub1b - bub1 mitotic checkpoint serine/threonine kinase b, Fbxo5 - f-box protein 5, Rcc1 - regulator of chromosome condensation 1, Plk1 - polo-like kinase 1, Mki67 - antigen identified by monoclonal antibody ki-67, Lif - leukemia inhibitory factor, Cdc6 - cell division cycle 6, Mad1l1 - mad1 …
GO:0000819	sister chromatid segregation	7.22e-06	0.000897	9.1	17529	24	562	7	[Dsn1 - dsn1, mis12 kinetochore complex component, Nusap1 - nucleolar and spindle associated protein 1, Plk1 - polo-like kinase 1, Ino80 - ino80 homolog (s. cerevisiae), Top2a - topoisomerase (dna) ii alpha, Spag5 - sperm associated antigen 5, Knstrn - kinetochore-localized astrin/spag5 binding protein]
GO:0009725	response to hormone	7.3e-06	0.000899	1.82	17529	994	562	58	[Nf1 - neurofibromin 1, Rdx - radixin, Ddit4 - dna-damage-inducible transcript 4, Ets1 - v-ets avian erythroblastosis virus e26 oncogene homolog 1, Tgfb2 - transforming growth factor, beta 2, Acaca - acetyl-coa carboxylase alpha, Nr2f2 - nuclear receptor subfamily 2, group f, member 2, Wnt7b - wingless-type mmtv integration site family, member 7b, Eng - endoglin, L1cam - l1 cell adhesion molecule…
GO:0051172	negative regulation of nitrogen compound metabolic process	7.41e-06	0.000906	1.52	17529	2137	562	104	[Gsc - goosecoid homeobox, Dusp4 - dual specificity phosphatase 4, Lpcat1 - lysophosphatidylcholine acyltransferase 1, Nf1 - neurofibromin 1, Rc3h1 - ring finger and ccch-type domains 1, Ddit4 - dna-damage-inducible transcript 4, Birc6 - baculoviral iap repeat-containing 6, Ctsz - cathepsin z, Jdp2 - jun dimerization protein 2, Arrb1 - arrestin, beta 1, Nr2f2 - nuclear receptor subfamily 2, group…
GO:0051384	response to glucocorticoid	7.83e-06	0.00095	2.75	17529	272	562	24	[Srd5a1 - steroid-5-alpha-reductase, alpha polypeptide 1 (3-oxo-5 alpha-steroid delta 4-dehydrogenase alpha 1), Slit3 - slit homolog 3 (drosophila), Wnt5a - wingless-type mmtv integration site family, member 5a, Nf1 - neurofibromin 1, Ddit4 - dna-damage-inducible transcript 4, Pla2g4a - phospholipase a2, group iva (cytosolic, calcium-dependent), S100b - s100 calcium binding protein b, Bglap - bon…
GO:0040007	growth	7.85e-06	0.000945	2.38	17529	406	562	31	[Apod - apolipoprotein d, Nrn1 - neuritin 1, Raph1 - ras association (ralgds/af-6) and pleckstrin homology domains 1, Lhx2 - lim homeobox 2, Tgfb2 - transforming growth factor, beta 2, Ercc2 - excision repair cross-complementing rodent repair deficiency, complementation group 2, Sema5a - sema domain, seven thrombospondin repeats (type 1 and type 1-like), transmembrane domain (tm) and short cytopl…
GO:0010604	positive regulation of macromolecule metabolic process	7.89e-06	0.000942	1.43	17529	2830	562	130	[Lpcat1 - lysophosphatidylcholine acyltransferase 1, Gli1 - gli family zinc finger 1, Gpr37l1 - g protein-coupled receptor 37-like 1, Rdx - radixin, Mybl2 - myeloblastosis oncogene-like 2, Rc3h1 - ring finger and ccch-type domains 1, Jdp2 - jun dimerization protein 2, Ngfr - nerve growth factor receptor, Arrb1 - arrestin, beta 1, Creb5 - camp responsive element binding protein 5, Chtf18 - ctf18, …
GO:0042060	wound healing	8.41e-06	0.000997	3.83	17529	122	562	15	[Wnt5a - wingless-type mmtv integration site family, member 5a, Nf1 - neurofibromin 1, Sdc2 - syndecan 2, Tgfb2 - transforming growth factor, beta 2, Wnt5b - wingless-type mmtv integration site family, member 5b, Smad4 - smad family member 4, Timp1 - timp metallopeptidase inhibitor 1, Sdc1 - syndecan 1, Eng - endoglin, Serpine1 - serpin peptidase inhibitor, clade e (nexin, plasminogen activator i…
GO:1901701	cellular response to oxygen-containing compound	8.41e-06	0.00099	1.85	17529	929	562	55	[Nf1 - neurofibromin 1, Ddit4 - dna-damage-inducible transcript 4, Ngfr - nerve growth factor receptor, Ets1 - v-ets avian erythroblastosis virus e26 oncogene homolog 1, Polg - polymerase (dna directed), gamma, Acaca - acetyl-coa carboxylase alpha, Ednrb - endothelin receptor type b, Wnt7b - wingless-type mmtv integration site family, member 7b, Col6a1 - collagen, type vi, alpha 1, L1cam - l1 cel…
GO:0098609	cell-cell adhesion	8.65e-06	0.00101	2.5	17529	349	562	28	[Itga5 - integrin, alpha 5 (fibronectin receptor, alpha polypeptide), Tyro3 - tyro3 protein tyrosine kinase, Tgfb2 - transforming growth factor, beta 2, Cd2ap - cd2-associated protein, Ttyh1 - tweety homolog 1 (drosophila), Itga4 - integrin, alpha 4, Pcdhgb5 - protocadherin gamma subfamily b, 5, Cyp1b1 - cytochrome p450, family 1, subfamily b, polypeptide 1, Wnt7b - wingless-type mmtv integration…
GO:0031346	positive regulation of cell projection organization	8.66e-06	0.001	2.37	17529	408	562	31	[Nf1 - neurofibromin 1, Metrn - meteorin, glial cell differentiation regulator, Ngfr - nerve growth factor receptor, Coro1c - coronin, actin binding protein 1c, Arsb - arylsulfatase b, Shank1 - sh3 and multiple ankyrin repeat domains 1, Sema5a - sema domain, seven thrombospondin repeats (type 1 and type 1-like), transmembrane domain (tm) and short cytoplasmic domain, (semaphorin) 5a, Lif - leukem…
GO:0007088	regulation of mitotic nuclear division	9.09e-06	0.00104	3.62	17529	138	562	16	[Tom1l1 - target of myb1 (chicken)-like 1, Bub1b - bub1 mitotic checkpoint serine/threonine kinase b, Fbxo5 - f-box protein 5, Rcc1 - regulator of chromosome condensation 1, Plk1 - polo-like kinase 1, Mki67 - antigen identified by monoclonal antibody ki-67, Cdc6 - cell division cycle 6, Birc5 - baculoviral iap repeat-containing 5, Mad1l1 - mad1 mitotic arrest deficient-like 1 (yeast), Pttg1 - pit…
GO:0008285	negative regulation of cell proliferation	9.38e-06	0.00107	2.05	17529	640	562	42	[Apod - apolipoprotein d, Nf1 - neurofibromin 1, Pbrm1 - polybromo 1, Strn - striatin, calmodulin binding protein, Nfatc1 - nuclear factor of activated t-cells, cytoplasmic, calcineurin-dependent 1, Rc3h1 - ring finger and ccch-type domains 1, Rarres1 - retinoic acid receptor responder (tazarotene induced) 1, Rap1gap - rap1 gtpase-activating protein, Ngfr - nerve growth factor receptor, Tgfb2 - t…
GO:0042221	response to chemical	9.79e-06	0.00111	1.41	17529	3005	562	136	[Nf1 - neurofibromin 1, Rdx - radixin, Mybl2 - myeloblastosis oncogene-like 2, Rc3h1 - ring finger and ccch-type domains 1, Ddit4 - dna-damage-inducible transcript 4, Ngfr - nerve growth factor receptor, Arrb1 - arrestin, beta 1, Tgfb2 - transforming growth factor, beta 2, Acaca - acetyl-coa carboxylase alpha, Nr2f2 - nuclear receptor subfamily 2, group f, member 2, Khsrp - kh-type splicing regul…
GO:0010646	regulation of cell communication	1e-05	0.00113	1.42	17529	2952	562	134	[Gsc - goosecoid homeobox, Dusp4 - dual specificity phosphatase 4, Gli1 - gli family zinc finger 1, Nf1 - neurofibromin 1, Gpr37l1 - g protein-coupled receptor 37-like 1, Rc3h1 - ring finger and ccch-type domains 1, Esm1 - endothelial cell-specific molecule 1, Ddit4 - dna-damage-inducible transcript 4, Birc6 - baculoviral iap repeat-containing 6, Ngfr - nerve growth factor receptor, Unc5b - unc-5…
GO:0030030	cell projection organization	1.16e-05	0.00129	1.92	17529	779	562	48	[Apod - apolipoprotein d, Rdx - radixin, Strn - striatin, calmodulin binding protein, Ehd3 - eh-domain containing 3, Sdc2 - syndecan 2, Dbndd2 - dysbindin (dystrobrevin binding protein 1) domain containing 2, Llgl1 - lethal giant larvae homolog 1 (drosophila), Ttyh1 - tweety homolog 1 (drosophila), Tspan2 - tetraspanin 2, Shank1 - sh3 and multiple ankyrin repeat domains 1, Sema5a - sema domain, s…
GO:0044087	regulation of cellular component biogenesis	1.17e-05	0.0013	1.91	17529	802	562	49	[Apod - apolipoprotein d, Tppp - tubulin polymerization promoting protein, Rdx - radixin, Myo10 - myosin x, Plk1 - polo-like kinase 1, Mtpn - myotrophin, Src - v-src avian sarcoma (schmidt-ruppin a-2) viral oncogene homolog, Stil - scl/tal1 interrupting locus, Tenm2 - teneurin transmembrane protein 2, Spag5 - sperm associated antigen 5, Wnt5a - wingless-type mmtv integration site family, member 5…
GO:0006996	organelle organization	1.28e-05	0.00141	1.56	17529	1802	562	90	[Elmo1 - engulfment and cell motility 1, Fancd2 - fanconi anemia, complementation group d2, Tppp - tubulin polymerization promoting protein, Nf1 - neurofibromin 1, Mybl2 - myeloblastosis oncogene-like 2, Rc3h1 - ring finger and ccch-type domains 1, Bub1b - bub1 mitotic checkpoint serine/threonine kinase b, Actn1 - actinin, alpha 1, Fmnl3 - formin-like 3, Plk1 - polo-like kinase 1, Arrb1 - arresti…
GO:0051985	negative regulation of chromosome segregation	1.3e-05	0.00142	8.4	17529	26	562	7	[Mad1l1 - mad1 mitotic arrest deficient-like 1 (yeast), Bub1b - bub1 mitotic checkpoint serine/threonine kinase b, Pttg1 - pituitary tumor-transforming 1, Plk1 - polo-like kinase 1, Chtf18 - ctf18, chromosome transmission fidelity factor 18 homolog (s. cerevisiae), Recql4 - recq protein-like 4, Cenpe - centromere protein e]
GO:0014070	response to organic cyclic compound	1.47e-05	0.0016	1.74	17529	1113	562	62	[Nf1 - neurofibromin 1, Ddit4 - dna-damage-inducible transcript 4, Ets1 - v-ets avian erythroblastosis virus e26 oncogene homolog 1, Tgfb2 - transforming growth factor, beta 2, Acaca - acetyl-coa carboxylase alpha, Nr2f2 - nuclear receptor subfamily 2, group f, member 2, Ednrb - endothelin receptor type b, Wnt7b - wingless-type mmtv integration site family, member 7b, Eng - endoglin, L1cam - l1 c…
GO:1901989	positive regulation of cell cycle phase transition	1.49e-05	0.00161	4.83	17529	71	562	11	[Rcc2 - regulator of chromosome condensation 2, Stxbp4 - syntaxin binding protein 4, Gli1 - gli family zinc finger 1, Birc5 - baculoviral iap repeat-containing 5, Rdx - radixin, Cdc7 - cell division cycle 7, Cdc45 - cell division cycle 45, Ube2c - ubiquitin-conjugating enzyme e2c, Hyal1 - hyaluronoglucosaminidase 1, Dtl - denticleless e3 ubiquitin protein ligase homolog (drosophila), Cenpe - cent…
GO:1901700	response to oxygen-containing compound	1.51e-05	0.00161	1.58	17529	1682	562	85	[Apod - apolipoprotein d, Nf1 - neurofibromin 1, Ddit4 - dna-damage-inducible transcript 4, Ngfr - nerve growth factor receptor, Polg - polymerase (dna directed), gamma, Ets1 - v-ets avian erythroblastosis virus e26 oncogene homolog 1, Tgfb2 - transforming growth factor, beta 2, Acaca - acetyl-coa carboxylase alpha, Nr2f2 - nuclear receptor subfamily 2, group f, member 2, Ednrb - endothelin recep…
GO:0001503	ossification	1.51e-05	0.00161	3.66	17529	128	562	15	[Fat4 - fat atypical cadherin 4, Acp5 - acid phosphatase 5, tartrate resistant, Ibsp - integrin-binding sialoprotein, Foxc2 - forkhead box c2, Bglap - bone gamma-carboxyglutamate (gla) protein, Runx2 - runt-related transcription factor 2, Mmp9 - matrix metallopeptidase 9, Mmp13 - matrix metallopeptidase 13, Pth1r - parathyroid hormone 1 receptor, Fstl3 - follistatin-like 3 (secreted glycoprotein)…
GO:0010648	negative regulation of cell communication	1.55e-05	0.00163	1.71	17529	1187	562	65	[Dusp4 - dual specificity phosphatase 4, Gsc - goosecoid homeobox, Gli1 - gli family zinc finger 1, Sostdc1 - sclerostin domain containing 1, Apod - apolipoprotein d, Nf1 - neurofibromin 1, Gpr37l1 - g protein-coupled receptor 37-like 1, Birc6 - baculoviral iap repeat-containing 6, Ddit4 - dna-damage-inducible transcript 4, Unc5b - unc-5 homolog b (c. elegans), Ngfr - nerve growth factor receptor…
GO:0060255	regulation of macromolecule metabolic process	1.6e-05	0.00167	1.28	17529	4954	562	204	[Dusp4 - dual specificity phosphatase 4, Gsc - goosecoid homeobox, Gpr37l1 - g protein-coupled receptor 37-like 1, Rdx - radixin, Srpk1 - srsf protein kinase 1, Rc3h1 - ring finger and ccch-type domains 1, Mybl2 - myeloblastosis oncogene-like 2, Jdp2 - jun dimerization protein 2, Birc6 - baculoviral iap repeat-containing 6, Ctsz - cathepsin z, Creb5 - camp responsive element binding protein 5, Mt…
GO:0032989	cellular component morphogenesis	1.61e-05	0.00167	2.23	17529	462	562	33	[Actn1 - actinin, alpha 1, Sdc2 - syndecan 2, Tyro3 - tyro3 protein tyrosine kinase, Tgfb2 - transforming growth factor, beta 2, Llgl1 - lethal giant larvae homolog 1 (drosophila), Shank1 - sh3 and multiple ankyrin repeat domains 1, Itga4 - integrin, alpha 4, Wnt7b - wingless-type mmtv integration site family, member 7b, Itgb3 - integrin, beta 3, Src - v-src avian sarcoma (schmidt-ruppin a-2) vir…
GO:0023057	negative regulation of signaling	1.68e-05	0.00173	1.7	17529	1190	562	65	[Dusp4 - dual specificity phosphatase 4, Gsc - goosecoid homeobox, Gli1 - gli family zinc finger 1, Apod - apolipoprotein d, Sostdc1 - sclerostin domain containing 1, Nf1 - neurofibromin 1, Gpr37l1 - g protein-coupled receptor 37-like 1, Birc6 - baculoviral iap repeat-containing 6, Ddit4 - dna-damage-inducible transcript 4, Unc5b - unc-5 homolog b (c. elegans), Ngfr - nerve growth factor receptor…
GO:0060317	cardiac epithelial to mesenchymal transition	1.7e-05	0.00175	8.09	17529	27	562	7	[Eng - endoglin, Erg - v-ets avian erythroblastosis virus e26 oncogene, Hey1 - hairy/enhancer-of-split related with yrpw motif 1, Tgfb2 - transforming growth factor, beta 2, Snai2 - snail family zinc finger 2, Smad4 - smad family member 4, Snai1 - snail family zinc finger 1]
GO:1901987	regulation of cell cycle phase transition	1.71e-05	0.00174	2.77	17529	248	562	22	[Rcc2 - regulator of chromosome condensation 2, Gli1 - gli family zinc finger 1, Stxbp4 - syntaxin binding protein 4, Rdx - radixin, Atad5 - atpase family, aaa domain containing 5, Bub1b - bub1 mitotic checkpoint serine/threonine kinase b, Cdc45 - cell division cycle 45, Plk1 - polo-like kinase 1, Ercc2 - excision repair cross-complementing rodent repair deficiency, complementation group 2, Ino80…
GO:2000027	regulation of organ morphogenesis	1.73e-05	0.00175	3.04	17529	195	562	19	[Wnt5a - wingless-type mmtv integration site family, member 5a, Gli1 - gli family zinc finger 1, Nkd1 - naked cuticle homolog 1 (drosophila), Foxc2 - forkhead box c2, Ngfr - nerve growth factor receptor, Tgfb2 - transforming growth factor, beta 2, Pml - promyelocytic leukemia, Snai2 - snail family zinc finger 2, Smad4 - smad family member 4, Lif - leukemia inhibitory factor, Runx2 - runt-related …
GO:0001568	blood vessel development	1.86e-05	0.00187	3.42	17529	146	562	16	[Lama4 - laminin, alpha 4, Col5a1 - collagen, type v, alpha 1, Foxc2 - forkhead box c2, Ngfr - nerve growth factor receptor, Tgfb2 - transforming growth factor, beta 2, Nr2f2 - nuclear receptor subfamily 2, group f, member 2, Luzp1 - leucine zipper protein 1, Ndst1 - n-deacetylase/n-sulfotransferase (heparan glucosaminyl) 1, Angpt1 - angiopoietin 1, Foxs1 - forkhead box s1, Hey1 - hairy/enhancer-…
GO:0048754	branching morphogenesis of an epithelial tube	1.86e-05	0.00186	3.42	17529	146	562	16	[Wnt5a - wingless-type mmtv integration site family, member 5a, Fat4 - fat atypical cadherin 4, Rdh10 - retinol dehydrogenase 10 (all-trans), Nfatc1 - nuclear factor of activated t-cells, cytoplasmic, calcineurin-dependent 1, Ctsz - cathepsin z, Foxc2 - forkhead box c2, Clic4 - chloride intracellular channel 4, Pml - promyelocytic leukemia, Sema5a - sema domain, seven thrombospondin repeats (type…
GO:0019222	regulation of metabolic process	1.86e-05	0.00185	1.27	17529	5374	562	218	[Dusp4 - dual specificity phosphatase 4, Gsc - goosecoid homeobox, Gpr37l1 - g protein-coupled receptor 37-like 1, Rdx - radixin, Srpk1 - srsf protein kinase 1, Mybl2 - myeloblastosis oncogene-like 2, Rc3h1 - ring finger and ccch-type domains 1, Jdp2 - jun dimerization protein 2, Birc6 - baculoviral iap repeat-containing 6, Ctsz - cathepsin z, Creb5 - camp responsive element binding protein 5, Mt…
GO:0031324	negative regulation of cellular metabolic process	1.87e-05	0.00184	1.47	17529	2289	562	108	[Gsc - goosecoid homeobox, Dusp4 - dual specificity phosphatase 4, Lpcat1 - lysophosphatidylcholine acyltransferase 1, Nf1 - neurofibromin 1, Rc3h1 - ring finger and ccch-type domains 1, Ddit4 - dna-damage-inducible transcript 4, Birc6 - baculoviral iap repeat-containing 6, Ctsz - cathepsin z, Jdp2 - jun dimerization protein 2, Arrb1 - arrestin, beta 1, Tgfb2 - transforming growth factor, beta 2,…
GO:0031099	regeneration	2.09e-05	0.00204	2.81	17529	233	562	21	[Apod - apolipoprotein d, Gli1 - gli family zinc finger 1, Mki67 - antigen identified by monoclonal antibody ki-67, Dhfr - dihydrofolate reductase, Mtpn - myotrophin, Ncl - nucleolin, Lif - leukemia inhibitory factor, Tyms - thymidylate synthetase, Ccne1 - cyclin e1, Angpt1 - angiopoietin 1, Serpine1 - serpin peptidase inhibitor, clade e (nexin, plasminogen activator inhibitor type 1), member 1, …
GO:0051056	regulation of small GTPase mediated signal transduction	2.09e-05	0.00203	2.81	17529	233	562	21	[Nf1 - neurofibromin 1, Foxm1 - forkhead box m1, Rap1gap - rap1 gtpase-activating protein, Myo9b - myosin ixb, Plekhg2 - pleckstrin homology domain containing, family g (with rhogef domain) member 2, Ngfr - nerve growth factor receptor, Ect2 - epithelial cell transforming sequence 2 oncogene, Arrb1 - arrestin, beta 1, Cd2ap - cd2-associated protein, Tgfb2 - transforming growth factor, beta 2, Fgd…
GO:0034097	response to cytokine	2.18e-05	0.0021	2.04	17529	597	562	39	[Ptgis - prostaglandin i2 (prostacyclin) synthase, Acp5 - acid phosphatase 5, tartrate resistant, Rc3h1 - ring finger and ccch-type domains 1, Mybl2 - myeloblastosis oncogene-like 2, Ets1 - v-ets avian erythroblastosis virus e26 oncogene homolog 1, Tgfb2 - transforming growth factor, beta 2, Itga4 - integrin, alpha 4, Trim2 - tripartite motif-containing 2, Ncl - nucleolin, Timp1 - timp metallopep…
GO:0003198	epithelial to mesenchymal transition involved in endocardial cushion formation	2.19e-05	0.0021	13	17529	12	562	5	[Eng - endoglin, Hey1 - hairy/enhancer-of-split related with yrpw motif 1, Snai2 - snail family zinc finger 2, Smad4 - smad family member 4, Snai1 - snail family zinc finger 1]
GO:0007163	establishment or maintenance of cell polarity	2.19e-05	0.0021	3.54	17529	132	562	15	[Wnt5a - wingless-type mmtv integration site family, member 5a, Gsk3b - glycogen synthase kinase 3 beta, Myo9b - myosin ixb, Ezr - ezrin, Lhx2 - lim homeobox 2, Llgl1 - lethal giant larvae homolog 1 (drosophila), Fscn1 - fascin homolog 1, actin bundling protein (strongylocentrotus purpuratus), Mark2 - map/microtubule affinity-regulating kinase 2, Dlg3 - discs, large homolog 3 (drosophila), Wnt7b …
GO:0001649	osteoblast differentiation	2.28e-05	0.00217	3.73	17529	117	562	14	[Nf1 - neurofibromin 1, Gli1 - gli family zinc finger 1, Tpm4 - tropomyosin 4, Ibsp - integrin-binding sialoprotein, Dhh - desert hedgehog, Smad4 - smad family member 4, Snai2 - snail family zinc finger 2, Bglap - bone gamma-carboxyglutamate (gla) protein, Snai1 - snail family zinc finger 1, Col11a2 - collagen, type xi, alpha 2, Runx2 - runt-related transcription factor 2, Col6a1 - collagen, type…
GO:0010605	negative regulation of macromolecule metabolic process	2.38e-05	0.00224	1.47	17529	2249	562	106	[Gsc - goosecoid homeobox, Dusp4 - dual specificity phosphatase 4, Nf1 - neurofibromin 1, Rc3h1 - ring finger and ccch-type domains 1, Ddit4 - dna-damage-inducible transcript 4, Birc6 - baculoviral iap repeat-containing 6, Ctsz - cathepsin z, Jdp2 - jun dimerization protein 2, Arrb1 - arrestin, beta 1, Tgfb2 - transforming growth factor, beta 2, Nr2f2 - nuclear receptor subfamily 2, group f, memb…
GO:0009893	positive regulation of metabolic process	2.38e-05	0.00223	1.39	17529	3058	562	136	[Lpcat1 - lysophosphatidylcholine acyltransferase 1, Gli1 - gli family zinc finger 1, Nf1 - neurofibromin 1, Gpr37l1 - g protein-coupled receptor 37-like 1, Rdx - radixin, Rc3h1 - ring finger and ccch-type domains 1, Mybl2 - myeloblastosis oncogene-like 2, Jdp2 - jun dimerization protein 2, Ngfr - nerve growth factor receptor, Arrb1 - arrestin, beta 1, Creb5 - camp responsive element binding prot…
GO:0048732	gland development	2.53e-05	0.00236	2.36	17529	370	562	28	[Nf1 - neurofibromin 1, Gli1 - gli family zinc finger 1, Ets1 - v-ets avian erythroblastosis virus e26 oncogene homolog 1, Tgfb2 - transforming growth factor, beta 2, Ncl - nucleolin, Cyp1b1 - cytochrome p450, family 1, subfamily b, polypeptide 1, Fstl3 - follistatin-like 3 (secreted glycoprotein), Flt1 - fms-related tyrosine kinase 1, Lbp - lipopolysaccharide binding protein, Arg1 - arginase, li…
GO:0051276	chromosome organization	2.68e-05	0.00249	2.62	17529	274	562	23	[Brip1 - brca1 interacting protein c-terminal helicase 1, Fancd2 - fanconi anemia, complementation group d2, Mcm6 - minichromosome maintenance complex component 6, Gtf2h4 - general transcription factor ii h, polypeptide 4, Bub1b - bub1 mitotic checkpoint serine/threonine kinase b, Cdc45 - cell division cycle 45, Hnrnpa1 - heterogeneous nuclear ribonucleoprotein a1, Plk1 - polo-like kinase 1, Rad5…
GO:0051098	regulation of binding	2.78e-05	0.00256	2.39	17529	352	562	27	[Rap1gap - rap1 gtpase-activating protein, Ctsz - cathepsin z, Ica1 - islet cell autoantigen 1, Arrb1 - arrestin, beta 1, Lhx2 - lim homeobox 2, Plk1 - polo-like kinase 1, Tgfb2 - transforming growth factor, beta 2, Ercc2 - excision repair cross-complementing rodent repair deficiency, complementation group 2, Itga4 - integrin, alpha 4, Lif - leukemia inhibitory factor, Zbtb7c - zinc finger and bt…
GO:0002076	osteoblast development	2.79e-05	0.00256	9.36	17529	20	562	6	[Runx2 - runt-related transcription factor 2, Tnn - tenascin n, Hey1 - hairy/enhancer-of-split related with yrpw motif 1, Pth1r - parathyroid hormone 1 receptor, Satb2 - satb homeobox 2, Bglap - bone gamma-carboxyglutamate (gla) protein]
GO:0065008	regulation of biological quality	2.91e-05	0.00265	1.38	17529	3098	562	137	[Lpcat1 - lysophosphatidylcholine acyltransferase 1, Nf1 - neurofibromin 1, Rdx - radixin, Rc3h1 - ring finger and ccch-type domains 1, Myo10 - myosin x, Ngfr - nerve growth factor receptor, Plcb3 - phospholipase c, beta 3 (phosphatidylinositol-specific), Arrb1 - arrestin, beta 1, Tgfb2 - transforming growth factor, beta 2, Acaca - acetyl-coa carboxylase alpha, Nr2f2 - nuclear receptor subfamily …
GO:0048589	developmental growth	3.22e-05	0.00291	2.37	17529	355	562	27	[Apod - apolipoprotein d, Nrn1 - neuritin 1, Raph1 - ras association (ralgds/af-6) and pleckstrin homology domains 1, Lhx2 - lim homeobox 2, Ercc2 - excision repair cross-complementing rodent repair deficiency, complementation group 2, Mtpn - myotrophin, Sema5a - sema domain, seven thrombospondin repeats (type 1 and type 1-like), transmembrane domain (tm) and short cytoplasmic domain, (semaphorin…
GO:0046697	decidualization	3.59e-05	0.00323	7.28	17529	30	562	7	[Cdh1 - cadherin 1, Ptgis - prostaglandin i2 (prostacyclin) synthase, Serpine1 - serpin peptidase inhibitor, clade e (nexin, plasminogen activator inhibitor type 1), member 1, Pla2g4a - phospholipase a2, group iva (cytosolic, calcium-dependent), Vdr - vitamin d (1,25- dihydroxyvitamin d3) receptor, Ppard - peroxisome proliferator-activated receptor delta, Lif - leukemia inhibitory factor]
GO:0048762	mesenchymal cell differentiation	3.71e-05	0.00331	4.4	17529	78	562	11	[Wnt5a - wingless-type mmtv integration site family, member 5a, Nfatc1 - nuclear factor of activated t-cells, cytoplasmic, calcineurin-dependent 1, Eng - endoglin, Erg - v-ets avian erythroblastosis virus e26 oncogene, Gsk3b - glycogen synthase kinase 3 beta, Hey1 - hairy/enhancer-of-split related with yrpw motif 1, Tgfb2 - transforming growth factor, beta 2, Flna - filamin a, alpha, Snai2 - snai…
GO:0030029	actin filament-based process	3.94e-05	0.0035	2.5	17529	300	562	24	[Elmo1 - engulfment and cell motility 1, Nf1 - neurofibromin 1, Actn1 - actinin, alpha 1, Myo9b - myosin ixb, Fmnl3 - formin-like 3, Ezr - ezrin, Racgap1 - rac gtpase-activating protein 1, Arrb1 - arrestin, beta 1, Llgl1 - lethal giant larvae homolog 1 (drosophila), Coro1c - coronin, actin binding protein 1c, Gas2l3 - growth arrest-specific 2 like 3, Fscn1 - fascin homolog 1, actin bundling prote…
GO:1901990	regulation of mitotic cell cycle phase transition	3.98e-05	0.00351	2.77	17529	225	562	20	[Rcc2 - regulator of chromosome condensation 2, Rdx - radixin, Atad5 - atpase family, aaa domain containing 5, Bub1b - bub1 mitotic checkpoint serine/threonine kinase b, Cdc45 - cell division cycle 45, Plk1 - polo-like kinase 1, Ercc2 - excision repair cross-complementing rodent repair deficiency, complementation group 2, Ino80 - ino80 homolog (s. cerevisiae), Pml - promyelocytic leukemia, Cdc6 -…
GO:0061245	establishment or maintenance of bipolar cell polarity	3.99e-05	0.0035	6.09	17529	41	562	8	[Wnt5a - wingless-type mmtv integration site family, member 5a, Dlg3 - discs, large homolog 3 (drosophila), Ezr - ezrin, Lhx2 - lim homeobox 2, Llgl1 - lethal giant larvae homolog 1 (drosophila), Fscn1 - fascin homolog 1, actin bundling protein (strongylocentrotus purpuratus), Mark2 - map/microtubule affinity-regulating kinase 2, Ptk7 - protein tyrosine kinase 7]
GO:0035088	establishment or maintenance of apical/basal cell polarity	3.99e-05	0.00348	6.09	17529	41	562	8	[Wnt5a - wingless-type mmtv integration site family, member 5a, Dlg3 - discs, large homolog 3 (drosophila), Ezr - ezrin, Lhx2 - lim homeobox 2, Llgl1 - lethal giant larvae homolog 1 (drosophila), Fscn1 - fascin homolog 1, actin bundling protein (strongylocentrotus purpuratus), Mark2 - map/microtubule affinity-regulating kinase 2, Ptk7 - protein tyrosine kinase 7]
GO:0009987	cellular process	4.1e-05	0.00356	1.1	17529	12817	562	451	[Dusp4 - dual specificity phosphatase 4, Gsc - goosecoid homeobox, Srpk1 - srsf protein kinase 1, Birc6 - baculoviral iap repeat-containing 6, Raph1 - ras association (ralgds/af-6) and pleckstrin homology domains 1, Unc5b - unc-5 homolog b (c. elegans), Lat2 - linker for activation of t cells family, member 2, Creb5 - camp responsive element binding protein 5, Acaca - acetyl-coa carboxylase alpha…
GO:1902850	microtubule cytoskeleton organization involved in mitosis	4.18e-05	0.00361	4.34	17529	79	562	11	[Poc1a - poc1 centriolar protein homolog a (chlamydomonas), Birc5 - baculoviral iap repeat-containing 5, Eml1 - echinoderm microtubule associated protein like 1, Mybl2 - myeloblastosis oncogene-like 2, Ccnb1 - cyclin b1, Rcc1 - regulator of chromosome condensation 1, Nusap1 - nucleolar and spindle associated protein 1, Stil - scl/tal1 interrupting locus, Insc - inscuteable homolog (drosophila), C…
GO:0006281	DNA repair	4.26e-05	0.00366	2.43	17529	321	562	25	[Fancd2 - fanconi anemia, complementation group d2, Cdc45 - cell division cycle 45, Eme1 - essential meiotic structure-specific endonuclease 1, Mdc1 - mediator of dna damage checkpoint 1, Taok1 - tao kinase 1, Recql4 - recq protein-like 4, Ercc2 - excision repair cross-complementing rodent repair deficiency, complementation group 2, Eya3 - eyes absent homolog 3 (drosophila), Pold1 - polymerase (d…
GO:0035239	tube morphogenesis	4.39e-05	0.00375	2.67	17529	245	562	21	[Fat4 - fat atypical cadherin 4, Yap1 - yes-associated protein 1, Wnt5a - wingless-type mmtv integration site family, member 5a, Rdh10 - retinol dehydrogenase 10 (all-trans), Nfatc1 - nuclear factor of activated t-cells, cytoplasmic, calcineurin-dependent 1, Ctsz - cathepsin z, Foxc2 - forkhead box c2, Clic4 - chloride intracellular channel 4, Pml - promyelocytic leukemia, Smad4 - smad family mem…
GO:0003007	heart morphogenesis	4.93e-05	0.00418	5.2	17529	54	562	9	[Fat4 - fat atypical cadherin 4, Tbx2 - t-box 2, Col5a1 - collagen, type v, alpha 1, Flrt2 - fibronectin leucine rich transmembrane protein 2, Foxc2 - forkhead box c2, Tgfb2 - transforming growth factor, beta 2, Flna - filamin a, alpha, Col11a1 - collagen, type xi, alpha 1, Ptch1 - patched 1]
GO:0010639	negative regulation of organelle organization	4.96e-05	0.00419	2.41	17529	324	562	25	[Tom1l1 - target of myb1 (chicken)-like 1, Rdx - radixin, Bub1b - bub1 mitotic checkpoint serine/threonine kinase b, Hnrnpa1 - heterogeneous nuclear ribonucleoprotein a1, Atad2 - atpase family, aaa domain containing 2, Plk1 - polo-like kinase 1, Recql4 - recq protein-like 4, Shank1 - sh3 and multiple ankyrin repeat domains 1, Supt6h - suppressor of ty 6 homolog (s. cerevisiae), Lif - leukemia inh…
GO:0031323	regulation of cellular metabolic process	4.99e-05	0.00419	1.26	17529	5069	562	205	[Dusp4 - dual specificity phosphatase 4, Gsc - goosecoid homeobox, Gpr37l1 - g protein-coupled receptor 37-like 1, Rdx - radixin, Srpk1 - srsf protein kinase 1, Mybl2 - myeloblastosis oncogene-like 2, Rc3h1 - ring finger and ccch-type domains 1, Jdp2 - jun dimerization protein 2, Birc6 - baculoviral iap repeat-containing 6, Ctsz - cathepsin z, Creb5 - camp responsive element binding protein 5, Mt…
GO:2001251	negative regulation of chromosome organization	5.08e-05	0.00424	3.69	17529	110	562	13	[Bub1b - bub1 mitotic checkpoint serine/threonine kinase b, Atad2 - atpase family, aaa domain containing 2, Hnrnpa1 - heterogeneous nuclear ribonucleoprotein a1, Plk1 - polo-like kinase 1, Recql4 - recq protein-like 4, Supt6h - suppressor of ty 6 homolog (s. cerevisiae), Pml - promyelocytic leukemia, Mad1l1 - mad1 mitotic arrest deficient-like 1 (yeast), Pttg1 - pituitary tumor-transforming 1, Sr…
GO:0000070	mitotic sister chromatid segregation	5.09e-05	0.00423	8.51	17529	22	562	6	[Dsn1 - dsn1, mis12 kinetochore complex component, Nusap1 - nucleolar and spindle associated protein 1, Plk1 - polo-like kinase 1, Ino80 - ino80 homolog (s. cerevisiae), Knstrn - kinetochore-localized astrin/spag5 binding protein, Spag5 - sperm associated antigen 5]
GO:0051248	negative regulation of protein metabolic process	5.1e-05	0.00421	1.72	17529	1015	562	56	[Dusp4 - dual specificity phosphatase 4, Apod - apolipoprotein d, Nf1 - neurofibromin 1, Rc3h1 - ring finger and ccch-type domains 1, Ctsz - cathepsin z, Birc6 - baculoviral iap repeat-containing 6, Ddit4 - dna-damage-inducible transcript 4, Arrb1 - arrestin, beta 1, Dbndd2 - dysbindin (dystrobrevin binding protein 1) domain containing 2, Plk1 - polo-like kinase 1, Ago2 - argonaute risc catalytic…
GO:0051301	cell division	5.1e-05	0.00419	2.72	17529	229	562	20	[Brip1 - brca1 interacting protein c-terminal helicase 1, Cdca2 - cell division cycle associated 2, Cdc45 - cell division cycle 45, Cdca3 - cell division cycle associated 3, Cd2ap - cd2-associated protein, Tgfb2 - transforming growth factor, beta 2, Ercc2 - excision repair cross-complementing rodent repair deficiency, complementation group 2, Cdc6 - cell division cycle 6, Ccne1 - cyclin e1, Birc5…
GO:0080090	regulation of primary metabolic process	5.11e-05	0.00418	1.27	17529	4925	562	200	[Dusp4 - dual specificity phosphatase 4, Gsc - goosecoid homeobox, Gpr37l1 - g protein-coupled receptor 37-like 1, Rdx - radixin, Srpk1 - srsf protein kinase 1, Mybl2 - myeloblastosis oncogene-like 2, Rc3h1 - ring finger and ccch-type domains 1, Jdp2 - jun dimerization protein 2, Birc6 - baculoviral iap repeat-containing 6, Ctsz - cathepsin z, Creb5 - camp responsive element binding protein 5, Mt…
GO:1903392	negative regulation of adherens junction organization	5.24e-05	0.00426	11.14	17529	14	562	5	[Rcc2 - regulator of chromosome condensation 2, Apod - apolipoprotein d, Rdx - radixin, Src - v-src avian sarcoma (schmidt-ruppin a-2) viral oncogene homolog, Coro1c - coronin, actin binding protein 1c]
GO:0051171	regulation of nitrogen compound metabolic process	5.27e-05	0.00426	1.27	17529	4811	562	196	[Dusp4 - dual specificity phosphatase 4, Gsc - goosecoid homeobox, Gpr37l1 - g protein-coupled receptor 37-like 1, Rdx - radixin, Srpk1 - srsf protein kinase 1, Mybl2 - myeloblastosis oncogene-like 2, Rc3h1 - ring finger and ccch-type domains 1, Jdp2 - jun dimerization protein 2, Birc6 - baculoviral iap repeat-containing 6, Ctsz - cathepsin z, Creb5 - camp responsive element binding protein 5, Mt…
GO:0051173	positive regulation of nitrogen compound metabolic process	5.34e-05	0.0043	1.39	17529	2752	562	123	[Lpcat1 - lysophosphatidylcholine acyltransferase 1, Gli1 - gli family zinc finger 1, Nf1 - neurofibromin 1, Gpr37l1 - g protein-coupled receptor 37-like 1, Rdx - radixin, Rc3h1 - ring finger and ccch-type domains 1, Mybl2 - myeloblastosis oncogene-like 2, Jdp2 - jun dimerization protein 2, Ngfr - nerve growth factor receptor, Chtf18 - ctf18, chromosome transmission fidelity factor 18 homolog (s.…
GO:0070848	response to growth factor	5.61e-05	0.00449	2.26	17529	387	562	28	[Nf1 - neurofibromin 1, Rdx - radixin, Ibsp - integrin-binding sialoprotein, Rap1gap - rap1 gtpase-activating protein, Hnrnpa1 - heterogeneous nuclear ribonucleoprotein a1, Ncl - nucleolin, Bglap - bone gamma-carboxyglutamate (gla) protein, Runx2 - runt-related transcription factor 2, Eng - endoglin, L1cam - l1 cell adhesion molecule, Itgb3 - integrin, beta 3, Src - v-src avian sarcoma (schmidt-r…
GO:0000902	cell morphogenesis	5.86e-05	0.00467	2.88	17529	195	562	18	[Yap1 - yes-associated protein 1, Actn1 - actinin, alpha 1, Tyro3 - tyro3 protein tyrosine kinase, Ect2 - epithelial cell transforming sequence 2 oncogene, Tgfb2 - transforming growth factor, beta 2, Clic4 - chloride intracellular channel 4, Itga4 - integrin, alpha 4, Flna - filamin a, alpha, Cdh1 - cadherin 1, Src - v-src avian sarcoma (schmidt-ruppin a-2) viral oncogene homolog, Itgb3 - integri…
GO:0007346	regulation of mitotic cell cycle	5.93e-05	0.0047	2.11	17529	472	562	32	[Tom1l1 - target of myb1 (chicken)-like 1, Rdx - radixin, Atad5 - atpase family, aaa domain containing 5, Bub1b - bub1 mitotic checkpoint serine/threonine kinase b, Cdc45 - cell division cycle 45, Eme1 - essential meiotic structure-specific endonuclease 1, Rcc1 - regulator of chromosome condensation 1, Plk1 - polo-like kinase 1, Taok1 - tao kinase 1, Ercc2 - excision repair cross-complementing ro…
GO:0045597	positive regulation of cell differentiation	6.48e-05	0.00511	1.73	17529	976	562	54	[Nf1 - neurofibromin 1, Metrn - meteorin, glial cell differentiation regulator, Ngfr - nerve growth factor receptor, Ets1 - v-ets avian erythroblastosis virus e26 oncogene homolog 1, Tgfb2 - transforming growth factor, beta 2, Arsb - arylsulfatase b, Sema5a - sema domain, seven thrombospondin repeats (type 1 and type 1-like), transmembrane domain (tm) and short cytoplasmic domain, (semaphorin) 5a…
GO:0022407	regulation of cell-cell adhesion	6.56e-05	0.00514	2.28	17529	370	562	27	[Fancd2 - fanconi anemia, complementation group d2, Tbx18 - t-box18, Rdx - radixin, Rc3h1 - ring finger and ccch-type domains 1, Myo10 - myosin x, Rap1gap - rap1 gtpase-activating protein, Ets1 - v-ets avian erythroblastosis virus e26 oncogene homolog 1, Itga4 - integrin, alpha 4, Vsig4 - v-set and immunoglobulin domain containing 4, L1cam - l1 cell adhesion molecule, Nrarp - notch-regulated anky…
GO:0007052	mitotic spindle organization	6.63e-05	0.00517	5.01	17529	56	562	9	[Poc1a - poc1 centriolar protein homolog a (chlamydomonas), Birc5 - baculoviral iap repeat-containing 5, Eml1 - echinoderm microtubule associated protein like 1, Mybl2 - myeloblastosis oncogene-like 2, Ccnb1 - cyclin b1, Rcc1 - regulator of chromosome condensation 1, Stil - scl/tal1 interrupting locus, Cenpe - centromere protein e, Flna - filamin a, alpha]
GO:0010975	regulation of neuron projection development	6.67e-05	0.00517	2.05	17529	518	562	34	[Nf1 - neurofibromin 1, Metrn - meteorin, glial cell differentiation regulator, Ctsz - cathepsin z, Sdc2 - syndecan 2, Ngfr - nerve growth factor receptor, Arsb - arylsulfatase b, Shank1 - sh3 and multiple ankyrin repeat domains 1, Sema5a - sema domain, seven thrombospondin repeats (type 1 and type 1-like), transmembrane domain (tm) and short cytoplasmic domain, (semaphorin) 5a, Lif - leukemia in…
GO:0032508	DNA duplex unwinding	6.8e-05	0.00525	5.67	17529	44	562	8	[Mcm6 - minichromosome maintenance complex component 6, Brip1 - brca1 interacting protein c-terminal helicase 1, Gtf2h4 - general transcription factor ii h, polypeptide 4, Cdc45 - cell division cycle 45, Mcm5 - minichromosome maintenance complex component 5, Recql4 - recq protein-like 4, Ino80 - ino80 homolog (s. cerevisiae), Ercc2 - excision repair cross-complementing rodent repair deficiency, c…
GO:0010965	regulation of mitotic sister chromatid separation	6.8e-05	0.00522	5.67	17529	44	562	8	[Mad1l1 - mad1 mitotic arrest deficient-like 1 (yeast), Bub1b - bub1 mitotic checkpoint serine/threonine kinase b, Pttg1 - pituitary tumor-transforming 1, Ccnb1 - cyclin b1, Ube2c - ubiquitin-conjugating enzyme e2c, Plk1 - polo-like kinase 1, Cenpe - centromere protein e, Cdc6 - cell division cycle 6]
GO:0051784	negative regulation of nuclear division	6.8e-05	0.00519	5.67	17529	44	562	8	[Tom1l1 - target of myb1 (chicken)-like 1, Mad1l1 - mad1 mitotic arrest deficient-like 1 (yeast), Bub1b - bub1 mitotic checkpoint serine/threonine kinase b, Pttg1 - pituitary tumor-transforming 1, Fbxo5 - f-box protein 5, Plk1 - polo-like kinase 1, Cenpe - centromere protein e, Lif - leukemia inhibitory factor]
GO:0033554	cellular response to stress	6.81e-05	0.00518	1.61	17529	1296	562	67	[Fancd2 - fanconi anemia, complementation group d2, Apod - apolipoprotein d, Nf1 - neurofibromin 1, Ptgis - prostaglandin i2 (prostacyclin) synthase, Ddit4 - dna-damage-inducible transcript 4, Ngfr - nerve growth factor receptor, Mdc1 - mediator of dna damage checkpoint 1, Ets1 - v-ets avian erythroblastosis virus e26 oncogene homolog 1, Ercc2 - excision repair cross-complementing rodent repair d…
GO:0015804	neutral amino acid transport	6.93e-05	0.00525	6.62	17529	33	562	7	[Slc6a17 - solute carrier family 6 (neutral amino acid transporter), member 17, Slc6a9 - solute carrier family 6 (neurotransmitter transporter, glycine), member 9, Slc6a15 - solute carrier family 6 (neutral amino acid transporter), member 15, Slc1a4 - solute carrier family 1 (glutamate/neutral amino acid transporter), member 4, Slc38a5 - solute carrier family 38, member 5, Slc7a5 - solute carrier…
GO:0044259	multicellular organismal macromolecule metabolic process	6.93e-05	0.00522	6.62	17529	33	562	7	[Mmp9 - matrix metallopeptidase 9, Mmp13 - matrix metallopeptidase 13, Col5a1 - collagen, type v, alpha 1, Ctsk - cathepsin k, Acaca - acetyl-coa carboxylase alpha, Arg1 - arginase, liver, Mmp3 - matrix metallopeptidase 3]
GO:1901654	response to ketone	6.97e-05	0.00523	2.41	17529	311	562	24	[Srd5a1 - steroid-5-alpha-reductase, alpha polypeptide 1 (3-oxo-5 alpha-steroid delta 4-dehydrogenase alpha 1), Slit3 - slit homolog 3 (drosophila), Wnt5a - wingless-type mmtv integration site family, member 5a, Nf1 - neurofibromin 1, Ddit4 - dna-damage-inducible transcript 4, Tgfb2 - transforming growth factor, beta 2, Acaca - acetyl-coa carboxylase alpha, Bglap - bone gamma-carboxyglutamate (gl…
GO:0051246	regulation of protein metabolic process	7.24e-05	0.0054	1.42	17529	2445	562	111	[Dusp4 - dual specificity phosphatase 4, Lpcat1 - lysophosphatidylcholine acyltransferase 1, Nf1 - neurofibromin 1, Gpr37l1 - g protein-coupled receptor 37-like 1, Rdx - radixin, Rc3h1 - ring finger and ccch-type domains 1, Jdp2 - jun dimerization protein 2, Ddit4 - dna-damage-inducible transcript 4, Birc6 - baculoviral iap repeat-containing 6, Ctsz - cathepsin z, Ngfr - nerve growth factor recep…
GO:0032355	response to estradiol	7.33e-05	0.00544	2.65	17529	235	562	20	[Srd5a1 - steroid-5-alpha-reductase, alpha polypeptide 1 (3-oxo-5 alpha-steroid delta 4-dehydrogenase alpha 1), Wnt5a - wingless-type mmtv integration site family, member 5a, Dhh - desert hedgehog, Gsk3b - glycogen synthase kinase 3 beta, Ets1 - v-ets avian erythroblastosis virus e26 oncogene homolog 1, Tgfb2 - transforming growth factor, beta 2, Nr2f2 - nuclear receptor subfamily 2, group f, mem…
GO:0030036	actin cytoskeleton organization	7.36e-05	0.00543	2.51	17529	273	562	22	[Elmo1 - engulfment and cell motility 1, Nf1 - neurofibromin 1, Actn1 - actinin, alpha 1, Fmnl3 - formin-like 3, Ezr - ezrin, Racgap1 - rac gtpase-activating protein 1, Arrb1 - arrestin, beta 1, Coro1c - coronin, actin binding protein 1c, Llgl1 - lethal giant larvae homolog 1 (drosophila), Fscn1 - fascin homolog 1, actin bundling protein (strongylocentrotus purpuratus), Gas2l3 - growth arrest-spe…
GO:0051597	response to methylmercury	7.65e-05	0.00562	10.4	17529	15	562	5	[Ccne1 - cyclin e1, Pla2g4a - phospholipase a2, group iva (cytosolic, calcium-dependent), S100b - s100 calcium binding protein b, Arsb - arylsulfatase b, Arg1 - arginase, liver]
GO:0097435	supramolecular fiber organization	7.73e-05	0.00565	2.34	17529	333	562	25	[Nf1 - neurofibromin 1, Tppp - tubulin polymerization promoting protein, Col5a1 - collagen, type v, alpha 1, Actn1 - actinin, alpha 1, Arrb1 - arrestin, beta 1, Cd2ap - cd2-associated protein, Tgfb2 - transforming growth factor, beta 2, Cyp1b1 - cytochrome p450, family 1, subfamily b, polypeptide 1, Cgnl1 - cingulin-like 1, Src - v-src avian sarcoma (schmidt-ruppin a-2) viral oncogene homolog, Gf…
GO:0032269	negative regulation of cellular protein metabolic process	7.82e-05	0.00569	1.72	17529	959	562	53	[Dusp4 - dual specificity phosphatase 4, Nf1 - neurofibromin 1, Rc3h1 - ring finger and ccch-type domains 1, Ctsz - cathepsin z, Birc6 - baculoviral iap repeat-containing 6, Ddit4 - dna-damage-inducible transcript 4, Arrb1 - arrestin, beta 1, Dbndd2 - dysbindin (dystrobrevin binding protein 1) domain containing 2, Plk1 - polo-like kinase 1, Ago2 - argonaute risc catalytic component 2, Nr2f2 - nuc…
GO:1901342	regulation of vasculature development	7.84e-05	0.00568	2.57	17529	255	562	21	[Wnt5a - wingless-type mmtv integration site family, member 5a, Nf1 - neurofibromin 1, RGD1562037 - similar to otthump00000046255, Ptgis - prostaglandin i2 (prostacyclin) synthase, Itga5 - integrin, alpha 5 (fibronectin receptor, alpha polypeptide), Foxc2 - forkhead box c2, Ngfr - nerve growth factor receptor, Ets1 - v-ets avian erythroblastosis virus e26 oncogene homolog 1, Pml - promyelocytic l…
GO:0010810	regulation of cell-substrate adhesion	8.07e-05	0.00582	2.91	17529	182	562	17	[Rcc2 - regulator of chromosome condensation 2, Dock5 - dedicator of cytokinesis 5, Nf1 - neurofibromin 1, Apod - apolipoprotein d, Gsk3b - glycogen synthase kinase 3 beta, Itga5 - integrin, alpha 5 (fibronectin receptor, alpha polypeptide), Coro1c - coronin, actin binding protein 1c, Flna - filamin a, alpha, Serpine1 - serpin peptidase inhibitor, clade e (nexin, plasminogen activator inhibitor t…
GO:0050767	regulation of neurogenesis	8.32e-05	0.00597	1.79	17529	819	562	47	[Nf1 - neurofibromin 1, Gpr37l1 - g protein-coupled receptor 37-like 1, Metrn - meteorin, glial cell differentiation regulator, Rap1gap - rap1 gtpase-activating protein, Ctsz - cathepsin z, Sdc2 - syndecan 2, Ngfr - nerve growth factor receptor, Arsb - arylsulfatase b, Shank1 - sh3 and multiple ankyrin repeat domains 1, Ednrb - endothelin receptor type b, Sema5a - sema domain, seven thrombospondi…
GO:0009892	negative regulation of metabolic process	8.42e-05	0.00601	1.41	17529	2481	562	112	[Gsc - goosecoid homeobox, Dusp4 - dual specificity phosphatase 4, Lpcat1 - lysophosphatidylcholine acyltransferase 1, Nf1 - neurofibromin 1, Rc3h1 - ring finger and ccch-type domains 1, Jdp2 - jun dimerization protein 2, Ddit4 - dna-damage-inducible transcript 4, Birc6 - baculoviral iap repeat-containing 6, Ctsz - cathepsin z, Arrb1 - arrestin, beta 1, Tgfb2 - transforming growth factor, beta 2,…
GO:0008150	biological_process	8.63e-05	0.00614	1.05	17529	15784	562	531	[Gsc - goosecoid homeobox, Dusp4 - dual specificity phosphatase 4, Srpk1 - srsf protein kinase 1, Raph1 - ras association (ralgds/af-6) and pleckstrin homology domains 1, Birc6 - baculoviral iap repeat-containing 6, Lat2 - linker for activation of t cells family, member 2, Unc5b - unc-5 homolog b (c. elegans), Creb5 - camp responsive element binding protein 5, Acaca - acetyl-coa carboxylase alpha…
GO:0002040	sprouting angiogenesis	8.69e-05	0.00615	7.8	17529	24	562	6	[Angpt1 - angiopoietin 1, Esm1 - endothelial cell-specific molecule 1, Nrarp - notch-regulated ankyrin repeat protein, E2f8 - e2f transcription factor 8, Flt1 - fms-related tyrosine kinase 1, Parva - parvin, alpha]
GO:0033046	negative regulation of sister chromatid segregation	8.69e-05	0.00612	7.8	17529	24	562	6	[Mad1l1 - mad1 mitotic arrest deficient-like 1 (yeast), Bub1b - bub1 mitotic checkpoint serine/threonine kinase b, Pttg1 - pituitary tumor-transforming 1, Plk1 - polo-like kinase 1, Recql4 - recq protein-like 4, Cenpe - centromere protein e]
GO:0016310	phosphorylation	8.93e-05	0.00626	1.73	17529	940	562	52	[Nf1 - neurofibromin 1, Srpk1 - srsf protein kinase 1, Bub1b - bub1 mitotic checkpoint serine/threonine kinase b, Tyro3 - tyro3 protein tyrosine kinase, Plk1 - polo-like kinase 1, Tgfb2 - transforming growth factor, beta 2, Ercc2 - excision repair cross-complementing rodent repair deficiency, complementation group 2, Lif - leukemia inhibitory factor, Map3k6 - mitogen-activated protein kinase kina…
GO:1901992	positive regulation of mitotic cell cycle phase transition	0.000101	0.00705	4.76	17529	59	562	9	[Rcc2 - regulator of chromosome condensation 2, Birc5 - baculoviral iap repeat-containing 5, Rdx - radixin, Cdc7 - cell division cycle 7, Cdc45 - cell division cycle 45, Ube2c - ubiquitin-conjugating enzyme e2c, Hyal1 - hyaluronoglucosaminidase 1, Dtl - denticleless e3 ubiquitin protein ligase homolog (drosophila), Cenpe - centromere protein e]
GO:0051493	regulation of cytoskeleton organization	0.000102	0.00712	2.11	17529	443	562	30	[Rdx - radixin, Plekhg2 - pleckstrin homology domain containing, family g (with rhogef domain) member 2, Plk1 - polo-like kinase 1, Taok1 - tao kinase 1, Cd2ap - cd2-associated protein, Tgfb2 - transforming growth factor, beta 2, Shank1 - sh3 and multiple ankyrin repeat domains 1, Sema5a - sema domain, seven thrombospondin repeats (type 1 and type 1-like), transmembrane domain (tm) and short cyto…
GO:0042552	myelination	0.000107	0.0074	4.27	17529	73	562	10	[Pllp - plasmolipin, Nf1 - neurofibromin 1, Mpz - myelin protein zero, Kel - kell blood group, metallo-endopeptidase, Dhh - desert hedgehog, Plp1 - proteolipid protein 1, Tspan2 - tetraspanin 2, Ugt8 - udp glycosyltransferase 8, Mbp - myelin basic protein, Sox10 - sry (sex determining region y)-box 10]
GO:0048145	regulation of fibroblast proliferation	0.000113	0.00776	3.63	17529	103	562	12	[Wnt5a - wingless-type mmtv integration site family, member 5a, Mmp9 - matrix metallopeptidase 9, Nf1 - neurofibromin 1, Serpine1 - serpin peptidase inhibitor, clade e (nexin, plasminogen activator inhibitor type 1), member 1, Thy1 - thy-1 cell surface antigen, Ccnb1 - cyclin b1, Itgb3 - integrin, beta 3, Ngfr - nerve growth factor receptor, Pdgfb - platelet-derived growth factor beta polypeptide…
GO:0045859	regulation of protein kinase activity	0.000113	0.00777	1.85	17529	690	562	41	[Tom1l1 - target of myb1 (chicken)-like 1, Dusp4 - dual specificity phosphatase 4, Nf1 - neurofibromin 1, Plk1 - polo-like kinase 1, Arrb1 - arrestin, beta 1, Dbndd2 - dysbindin (dystrobrevin binding protein 1) domain containing 2, Tgfb2 - transforming growth factor, beta 2, Coro1c - coronin, actin binding protein 1c, Taok1 - tao kinase 1, Nr2f2 - nuclear receptor subfamily 2, group f, member 2, …
GO:0051271	negative regulation of cellular component movement	0.000115	0.00785	2.5	17529	262	562	21	[Wnt5a - wingless-type mmtv integration site family, member 5a, Apod - apolipoprotein d, Nf1 - neurofibromin 1, Actn1 - actinin, alpha 1, Gsk3b - glycogen synthase kinase 3 beta, Coro1c - coronin, actin binding protein 1c, Dpysl3 - dihydropyrimidinase-like 3, Clic4 - chloride intracellular channel 4, Nr2f2 - nuclear receptor subfamily 2, group f, member 2, Stard13 - star-related lipid transfer (s…
GO:2001204	regulation of osteoclast development	0.000116	0.00787	13.86	17529	9	562	4	[Slc9b2 - solute carrier family 9, subfamily b (nha2, cation proton antiporter 2), member 2, Tjp2 - tight junction protein 2, Siglec15 - sialic acid binding ig-like lectin 15, Gpr68 - g protein-coupled receptor 68]
GO:0048703	embryonic viscerocranium morphogenesis	0.000116	0.00784	13.86	17529	9	562	4	[Ndst1 - n-deacetylase/n-sulfotransferase (heparan glucosaminyl) 1, Rdh10 - retinol dehydrogenase 10 (all-trans), Foxc2 - forkhead box c2, Chst11 - carbohydrate (chondroitin 4) sulfotransferase 11]
GO:0006468	protein phosphorylation	0.000116	0.00783	1.82	17529	737	562	43	[Nf1 - neurofibromin 1, Srpk1 - srsf protein kinase 1, Bub1b - bub1 mitotic checkpoint serine/threonine kinase b, Tyro3 - tyro3 protein tyrosine kinase, Plk1 - polo-like kinase 1, Tgfb2 - transforming growth factor, beta 2, Taok1 - tao kinase 1, Ercc2 - excision repair cross-complementing rodent repair deficiency, complementation group 2, Cdk18 - cyclin-dependent kinase 18, Lif - leukemia inhibit…
GO:0050680	negative regulation of epithelial cell proliferation	0.000121	0.00812	3.21	17529	136	562	14	[Wnt5a - wingless-type mmtv integration site family, member 5a, Nf1 - neurofibromin 1, Rap1gap - rap1 gtpase-activating protein, Ngfr - nerve growth factor receptor, Tgfb2 - transforming growth factor, beta 2, Nr2f2 - nuclear receptor subfamily 2, group f, member 2, Snai2 - snail family zinc finger 2, Wdr13 - wd repeat domain 13, Cdh1 - cadherin 1, Eng - endoglin, Vdr - vitamin d (1,25- dihydroxy…
GO:0050919	negative chemotaxis	0.000125	0.00832	6.06	17529	36	562	7	[Slit3 - slit homolog 3 (drosophila), Wnt5a - wingless-type mmtv integration site family, member 5a, Nrp2 - neuropilin 2, Sema7a - semaphorin 7a, gpi membrane anchor, Flrt2 - fibronectin leucine rich transmembrane protein 2, Itgb3 - integrin, beta 3, Sema5a - sema domain, seven thrombospondin repeats (type 1 and type 1-like), transmembrane domain (tm) and short cytoplasmic domain, (semaphorin) 5a]
GO:1905818	regulation of chromosome separation	0.000129	0.00859	5.2	17529	48	562	8	[Mad1l1 - mad1 mitotic arrest deficient-like 1 (yeast), Bub1b - bub1 mitotic checkpoint serine/threonine kinase b, Pttg1 - pituitary tumor-transforming 1, Ccnb1 - cyclin b1, Ube2c - ubiquitin-conjugating enzyme e2c, Plk1 - polo-like kinase 1, Cenpe - centromere protein e, Cdc6 - cell division cycle 6]
GO:1904018	positive regulation of vasculature development	0.000131	0.00868	3.04	17529	154	562	15	[Wnt5a - wingless-type mmtv integration site family, member 5a, RGD1562037 - similar to otthump00000046255, Ptgis - prostaglandin i2 (prostacyclin) synthase, Itga5 - integrin, alpha 5 (fibronectin receptor, alpha polypeptide), Foxc2 - forkhead box c2, Ets1 - v-ets avian erythroblastosis virus e26 oncogene homolog 1, Sema5a - sema domain, seven thrombospondin repeats (type 1 and type 1-like), tran…
GO:0033045	regulation of sister chromatid segregation	0.000132	0.00868	4.6	17529	61	562	9	[Mad1l1 - mad1 mitotic arrest deficient-like 1 (yeast), Bub1b - bub1 mitotic checkpoint serine/threonine kinase b, Pttg1 - pituitary tumor-transforming 1, Ccnb1 - cyclin b1, Ube2c - ubiquitin-conjugating enzyme e2c, Plk1 - polo-like kinase 1, Recql4 - recq protein-like 4, Cenpe - centromere protein e, Cdc6 - cell division cycle 6]
GO:0120036	plasma membrane bounded cell projection organization	0.000136	0.0089	1.93	17529	582	562	36	[Apod - apolipoprotein d, Strn - striatin, calmodulin binding protein, Rdx - radixin, Ehd3 - eh-domain containing 3, Dbndd2 - dysbindin (dystrobrevin binding protein 1) domain containing 2, Ttyh1 - tweety homolog 1 (drosophila), Shank1 - sh3 and multiple ankyrin repeat domains 1, Tspan2 - tetraspanin 2, Sema5a - sema domain, seven thrombospondin repeats (type 1 and type 1-like), transmembrane dom…
GO:0000904	cell morphogenesis involved in differentiation	0.000136	0.00891	3.35	17529	121	562	13	[Actn1 - actinin, alpha 1, Tyro3 - tyro3 protein tyrosine kinase, Clic4 - chloride intracellular channel 4, Flna - filamin a, alpha, Itga4 - integrin, alpha 4, Cdh1 - cadherin 1, Itgb3 - integrin, beta 3, Src - v-src avian sarcoma (schmidt-ruppin a-2) viral oncogene homolog, Flnb - filamin b, beta, Parva - parvin, alpha, Reln - reelin, Col18a1 - collagen, type xviii, alpha 1, Fat3 - fat atypical …
GO:0003148	outflow tract septum morphogenesis	0.000141	0.00916	7.2	17529	26	562	6	[Nrp2 - neuropilin 2, Eng - endoglin, Tbx2 - t-box 2, Tgfb2 - transforming growth factor, beta 2, Parva - parvin, alpha, Smad4 - smad family member 4]
GO:0045766	positive regulation of angiogenesis	0.000153	0.00991	3.14	17529	139	562	14	[Wnt5a - wingless-type mmtv integration site family, member 5a, RGD1562037 - similar to otthump00000046255, Ptgis - prostaglandin i2 (prostacyclin) synthase, Foxc2 - forkhead box c2, Itga5 - integrin, alpha 5 (fibronectin receptor, alpha polypeptide), Ets1 - v-ets avian erythroblastosis virus e26 oncogene homolog 1, Sema5a - sema domain, seven thrombospondin repeats (type 1 and type 1-like), tran…
GO:0010638	positive regulation of organelle organization	0.000155	0.01	1.92	17529	586	562	36	[Hnrnpa1 - heterogeneous nuclear ribonucleoprotein a1, Jdp2 - jun dimerization protein 2, Arrb1 - arrestin, beta 1, Sema5a - sema domain, seven thrombospondin repeats (type 1 and type 1-like), transmembrane domain (tm) and short cytoplasmic domain, (semaphorin) 5a, Lif - leukemia inhibitory factor, Kirrel - kin of irre like (drosophila), Ube2c - ubiquitin-conjugating enzyme e2c, Src - v-src avian…
GO:0003006	developmental process involved in reproduction	0.000159	0.0102	1.84	17529	678	562	40	[Gli1 - gli family zinc finger 1, Pbrm1 - polybromo 1, Ptgis - prostaglandin i2 (prostacyclin) synthase, Dhh - desert hedgehog, Hnrnpa1 - heterogeneous nuclear ribonucleoprotein a1, Birc6 - baculoviral iap repeat-containing 6, Tyro3 - tyro3 protein tyrosine kinase, Tgfb2 - transforming growth factor, beta 2, Nr2f2 - nuclear receptor subfamily 2, group f, member 2, Lif - leukemia inhibitory factor…
GO:0010629	negative regulation of gene expression	0.000161	0.0103	1.54	17529	1436	562	71	[Gsc - goosecoid homeobox, Nfatc1 - nuclear factor of activated t-cells, cytoplasmic, calcineurin-dependent 1, Rc3h1 - ring finger and ccch-type domains 1, Jdp2 - jun dimerization protein 2, Ctsz - cathepsin z, Plk1 - polo-like kinase 1, Ago2 - argonaute risc catalytic component 2, Tgfb2 - transforming growth factor, beta 2, Nr2f2 - nuclear receptor subfamily 2, group f, member 2, Ednrb - endothe…
GO:0034329	cell junction assembly	0.000163	0.0104	3.5	17529	107	562	12	[Rcc2 - regulator of chromosome condensation 2, Cdh1 - cadherin 1, Actn1 - actinin, alpha 1, Thy1 - thy-1 cell surface antigen, Actn4 - actinin alpha 4, Itga5 - integrin, alpha 5 (fibronectin receptor, alpha polypeptide), Itgb3 - integrin, beta 3, Ect2 - epithelial cell transforming sequence 2 oncogene, Cldn1 - claudin 1, Fscn1 - fascin homolog 1, actin bundling protein (strongylocentrotus purpur…
GO:0032501	multicellular organismal process	0.000171	0.0108	1.34	17529	3048	562	131	[Gsc - goosecoid homeobox, Gli1 - gli family zinc finger 1, Nf1 - neurofibromin 1, Ctsz - cathepsin z, Ngfr - nerve growth factor receptor, Arrb1 - arrestin, beta 1, Tgfb2 - transforming growth factor, beta 2, Acaca - acetyl-coa carboxylase alpha, Ercc2 - excision repair cross-complementing rodent repair deficiency, complementation group 2, Nr2f2 - nuclear receptor subfamily 2, group f, member 2,…
GO:0048771	tissue remodeling	0.000171	0.0108	3.73	17529	92	562	11	[Efna2 - ephrin a2, Mmp9 - matrix metallopeptidase 9, Cspg4 - chondroitin sulfate proteoglycan 4, Foxc2 - forkhead box c2, Ptprv - protein tyrosine phosphatase, receptor type, v, Tgfb2 - transforming growth factor, beta 2, Arg1 - arginase, liver, Itga4 - integrin, alpha 4, Flna - filamin a, alpha, Lif - leukemia inhibitory factor, Tgm2 - transglutaminase 2, c polypeptide]
GO:0045765	regulation of angiogenesis	0.000172	0.0108	2.57	17529	231	562	19	[Wnt5a - wingless-type mmtv integration site family, member 5a, Nf1 - neurofibromin 1, RGD1562037 - similar to otthump00000046255, Ptgis - prostaglandin i2 (prostacyclin) synthase, Itga5 - integrin, alpha 5 (fibronectin receptor, alpha polypeptide), Foxc2 - forkhead box c2, Ngfr - nerve growth factor receptor, Ets1 - v-ets avian erythroblastosis virus e26 oncogene homolog 1, Pml - promyelocytic l…
GO:0009612	response to mechanical stimulus	0.000175	0.011	2.43	17529	270	562	21	[Gsk3b - glycogen synthase kinase 3 beta, Tlr5 - toll-like receptor 5, Ets1 - v-ets avian erythroblastosis virus e26 oncogene homolog 1, Mtpn - myotrophin, Bglap - bone gamma-carboxyglutamate (gla) protein, Mmp9 - matrix metallopeptidase 9, Eng - endoglin, Fadd - fas (tnfrsf6)-associated via death domain, Mmp13 - matrix metallopeptidase 13, Serpine1 - serpin peptidase inhibitor, clade e (nexin, p…
GO:0061564	axon development	0.000178	0.0111	5.75	17529	38	562	7	[Apod - apolipoprotein d, L1cam - l1 cell adhesion molecule, Mtr - 5-methyltetrahydrofolate-homocysteine methyltransferase, Plp1 - proteolipid protein 1, Dhfr - dihydrofolate reductase, Tspan2 - tetraspanin 2, Chl1 - cell adhesion molecule l1-like]
GO:0042330	taxis	0.00019	0.0118	2.48	17529	252	562	20	[Wnt5a - wingless-type mmtv integration site family, member 5a, Slit3 - slit homolog 3 (drosophila), Flrt2 - fibronectin leucine rich transmembrane protein 2, Myo9b - myosin ixb, Tgfb2 - transforming growth factor, beta 2, Ednrb - endothelin receptor type b, Sema5a - sema domain, seven thrombospondin repeats (type 1 and type 1-like), transmembrane domain (tm) and short cytoplasmic domain, (semaph…
GO:0031175	neuron projection development	0.000195	0.0121	2.35	17529	292	562	22	[Fat4 - fat atypical cadherin 4, Apod - apolipoprotein d, Strn - striatin, calmodulin binding protein, Gsk3b - glycogen synthase kinase 3 beta, Dbndd2 - dysbindin (dystrobrevin binding protein 1) domain containing 2, Plp1 - proteolipid protein 1, Dhfr - dihydrofolate reductase, Shank1 - sh3 and multiple ankyrin repeat domains 1, Tspan2 - tetraspanin 2, Sema5a - sema domain, seven thrombospondin r…
GO:0002693	positive regulation of cellular extravasation	0.000202	0.0124	8.66	17529	18	562	5	[Fadd - fas (tnfrsf6)-associated via death domain, Il1r1 - interleukin 1 receptor, type i, Thy1 - thy-1 cell surface antigen, Pawr - prkc, apoptosis, wt1, regulator, Itga4 - integrin, alpha 4]
GO:0051216	cartilage development	0.000209	0.0128	3.95	17529	79	562	10	[Tyms - thymidylate synthetase, Timp1 - timp metallopeptidase inhibitor 1, Wnt5a - wingless-type mmtv integration site family, member 5a, Col11a2 - collagen, type xi, alpha 2, Mmp13 - matrix metallopeptidase 13, Hyal1 - hyaluronoglucosaminidase 1, Satb2 - satb homeobox 2, Col11a1 - collagen, type xi, alpha 1, Chst11 - carbohydrate (chondroitin 4) sulfotransferase 11, Itgb8 - integrin, beta 8]
GO:0031325	positive regulation of cellular metabolic process	0.00021	0.0129	1.35	17529	2868	562	124	[Gli1 - gli family zinc finger 1, Nf1 - neurofibromin 1, Gpr37l1 - g protein-coupled receptor 37-like 1, Rdx - radixin, Rc3h1 - ring finger and ccch-type domains 1, Mybl2 - myeloblastosis oncogene-like 2, Jdp2 - jun dimerization protein 2, Ngfr - nerve growth factor receptor, Chtf18 - ctf18, chromosome transmission fidelity factor 18 homolog (s. cerevisiae), Arrb1 - arrestin, beta 1, Creb5 - camp…
GO:0030199	collagen fibril organization	0.000211	0.0129	5.6	17529	39	562	7	[Col11a2 - collagen, type xi, alpha 2, Cyp1b1 - cytochrome p450, family 1, subfamily b, polypeptide 1, Nf1 - neurofibromin 1, Col5a1 - collagen, type v, alpha 1, Foxc2 - forkhead box c2, Tgfb2 - transforming growth factor, beta 2, Col11a1 - collagen, type xi, alpha 1]
GO:0002791	regulation of peptide secretion	0.000213	0.0129	2.03	17529	462	562	30	[Slc9b2 - solute carrier family 9, subfamily b (nha2, cation proton antiporter 2), member 2, Ica1 - islet cell autoantigen 1, Arrb1 - arrestin, beta 1, Tgfb2 - transforming growth factor, beta 2, Llgl1 - lethal giant larvae homolog 1 (drosophila), Pfkl - phosphofructokinase, liver, Ncl - nucleolin, Lif - leukemia inhibitory factor, Angpt1 - angiopoietin 1, Src - v-src avian sarcoma (schmidt-ruppi…
GO:0071453	cellular response to oxygen levels	0.000215	0.013	2.91	17529	161	562	15	[Brip1 - brca1 interacting protein c-terminal helicase 1, Ptgis - prostaglandin i2 (prostacyclin) synthase, S100b - s100 calcium binding protein b, Cox4i2 - cytochrome c oxidase subunit iv isoform 2 (lung), Polr2a - polymerase (rna) ii (dna directed) polypeptide a, Hyou1 - hypoxia up-regulated 1, Serpine1 - serpin peptidase inhibitor, clade e (nexin, plasminogen activator inhibitor type 1), membe…
GO:0032570	response to progesterone	0.000217	0.013	4.32	17529	65	562	9	[Tyms - thymidylate synthetase, Ccne1 - cyclin e1, Cyp1b1 - cytochrome p450, family 1, subfamily b, polypeptide 1, Src - v-src avian sarcoma (schmidt-ruppin a-2) viral oncogene homolog, Tgfb2 - transforming growth factor, beta 2, Mbp - myelin basic protein, Reln - reelin, Socs3 - suppressor of cytokine signaling 3, Sox10 - sry (sex determining region y)-box 10]
GO:0031214	biomineral tissue development	0.000217	0.013	4.32	17529	65	562	9	[Mmp13 - matrix metallopeptidase 13, Ibsp - integrin-binding sialoprotein, Ifitm5 - interferon induced transmembrane protein 5, Pth1r - parathyroid hormone 1 receptor, Fam20a - family with sequence similarity 20, member a, Mepe - matrix extracellular phosphoglycoprotein, Ercc2 - excision repair cross-complementing rodent repair deficiency, complementation group 2, Bglap - bone gamma-carboxyglutam…
GO:0006796	phosphate-containing compound metabolic process	0.000223	0.0133	1.49	17529	1607	562	77	[Lpcat1 - lysophosphatidylcholine acyltransferase 1, Dusp4 - dual specificity phosphatase 4, Nf1 - neurofibromin 1, Srpk1 - srsf protein kinase 1, Rrm2 - ribonucleotide reductase m2, Bub1b - bub1 mitotic checkpoint serine/threonine kinase b, Tyro3 - tyro3 protein tyrosine kinase, Plk1 - polo-like kinase 1, Plcb3 - phospholipase c, beta 3 (phosphatidylinositol-specific), Tgfb2 - transforming growt…
GO:0045786	negative regulation of cell cycle	0.000229	0.0136	2.18	17529	357	562	25	[Tom1l1 - target of myb1 (chicken)-like 1, Bub1b - bub1 mitotic checkpoint serine/threonine kinase b, Eme1 - essential meiotic structure-specific endonuclease 1, Ngfr - nerve growth factor receptor, Ets1 - v-ets avian erythroblastosis virus e26 oncogene homolog 1, Plk1 - polo-like kinase 1, Tgfb2 - transforming growth factor, beta 2, Recql4 - recq protein-like 4, Nr2f2 - nuclear receptor subfamil…
GO:0033047	regulation of mitotic sister chromatid segregation	0.00023	0.0137	4.8	17529	52	562	8	[Mad1l1 - mad1 mitotic arrest deficient-like 1 (yeast), Bub1b - bub1 mitotic checkpoint serine/threonine kinase b, Pttg1 - pituitary tumor-transforming 1, Ccnb1 - cyclin b1, Ube2c - ubiquitin-conjugating enzyme e2c, Plk1 - polo-like kinase 1, Cenpe - centromere protein e, Cdc6 - cell division cycle 6]
GO:0030278	regulation of ossification	0.000239	0.0141	2.66	17529	199	562	17	[Wnt5a - wingless-type mmtv integration site family, member 5a, Gli1 - gli family zinc finger 1, Nfatc1 - nuclear factor of activated t-cells, cytoplasmic, calcineurin-dependent 1, Pla2g4a - phospholipase a2, group iva (cytosolic, calcium-dependent), Tgfb2 - transforming growth factor, beta 2, Mepe - matrix extracellular phosphoglycoprotein, Snai2 - snail family zinc finger 2, Bglap - bone gamma-…
GO:0030071	regulation of mitotic metaphase/anaphase transition	0.000249	0.0147	5.46	17529	40	562	7	[Mad1l1 - mad1 mitotic arrest deficient-like 1 (yeast), Bub1b - bub1 mitotic checkpoint serine/threonine kinase b, Ccnb1 - cyclin b1, Ube2c - ubiquitin-conjugating enzyme e2c, Plk1 - polo-like kinase 1, Cenpe - centromere protein e, Cdc6 - cell division cycle 6]
GO:0045576	mast cell activation	0.000266	0.0156	8.21	17529	19	562	5	[Lat - linker for activation of t cells, Serpine1 - serpin peptidase inhibitor, clade e (nexin, plasminogen activator inhibitor type 1), member 1, Thy1 - thy-1 cell surface antigen, Lat2 - linker for activation of t cells family, member 2, Lcp2 - lymphocyte cytosolic protein 2]
GO:0003401	axis elongation	0.000266	0.0155	8.21	17529	19	562	5	[Yap1 - yes-associated protein 1, Wnt5a - wingless-type mmtv integration site family, member 5a, Rdh10 - retinol dehydrogenase 10 (all-trans), Med12 - mediator complex subunit 12, Ptk7 - protein tyrosine kinase 7]
GO:0042634	regulation of hair cycle	0.000268	0.0156	6.45	17529	29	562	6	[Wnt5a - wingless-type mmtv integration site family, member 5a, Nfatc1 - nuclear factor of activated t-cells, cytoplasmic, calcineurin-dependent 1, Ngfr - nerve growth factor receptor, Tgfb2 - transforming growth factor, beta 2, Gal - galanin/gmap prepropeptide, Smad4 - smad family member 4]
GO:0090087	regulation of peptide transport	0.000272	0.0157	1.72	17529	814	562	45	[Apod - apolipoprotein d, Nf1 - neurofibromin 1, Slc9b2 - solute carrier family 9, subfamily b (nha2, cation proton antiporter 2), member 2, Ica1 - islet cell autoantigen 1, Arrb1 - arrestin, beta 1, Llgl1 - lethal giant larvae homolog 1 (drosophila), Tgfb2 - transforming growth factor, beta 2, Supt6h - suppressor of ty 6 homolog (s. cerevisiae), Pfkl - phosphofructokinase, liver, Sema5a - sema d…
GO:0050708	regulation of protein secretion	0.000272	0.0157	2.05	17529	425	562	28	[Slc9b2 - solute carrier family 9, subfamily b (nha2, cation proton antiporter 2), member 2, Ica1 - islet cell autoantigen 1, Arrb1 - arrestin, beta 1, Tgfb2 - transforming growth factor, beta 2, Llgl1 - lethal giant larvae homolog 1 (drosophila), Pfkl - phosphofructokinase, liver, Ncl - nucleolin, Angpt1 - angiopoietin 1, Src - v-src avian sarcoma (schmidt-ruppin a-2) viral oncogene homolog, Rhb…
GO:0030178	negative regulation of Wnt signaling pathway	0.00028	0.0161	3.12	17529	130	562	13	[Gsc - goosecoid homeobox, Wnt5a - wingless-type mmtv integration site family, member 5a, Gli1 - gli family zinc finger 1, Tbx18 - t-box18, Sostdc1 - sclerostin domain containing 1, Nkd1 - naked cuticle homolog 1 (drosophila), Wnt5b - wingless-type mmtv integration site family, member 5b, Snai2 - snail family zinc finger 2, Sox10 - sry (sex determining region y)-box 10, Cdh1 - cadherin 1, Kremen1…
GO:0071363	cellular response to growth factor stimulus	0.000283	0.0162	2.2	17529	341	562	24	[Srd5a1 - steroid-5-alpha-reductase, alpha polypeptide 1 (3-oxo-5 alpha-steroid delta 4-dehydrogenase alpha 1), Wnt5a - wingless-type mmtv integration site family, member 5a, Nf1 - neurofibromin 1, Rdx - radixin, Ibsp - integrin-binding sialoprotein, Rap1gap - rap1 gtpase-activating protein, Hnrnpa1 - heterogeneous nuclear ribonucleoprotein a1, Gsk3b - glycogen synthase kinase 3 beta, Snai2 - sna…
GO:0022607	cellular component assembly	0.000289	0.0165	1.43	17529	1937	562	89	[Tppp - tubulin polymerization promoting protein, Rdx - radixin, Srpk1 - srsf protein kinase 1, Rrm2 - ribonucleotide reductase m2, Mybl2 - myeloblastosis oncogene-like 2, Rc3h1 - ring finger and ccch-type domains 1, Actn1 - actinin, alpha 1, Dnal1 - dynein, axonemal, light chain 1, Arrb1 - arrestin, beta 1, Hist1h2bk - histone cluster 1, h2bk, Ago2 - argonaute risc catalytic component 2, Ttyh1 -…
GO:1902099	regulation of metaphase/anaphase transition of cell cycle	0.000292	0.0166	5.33	17529	41	562	7	[Mad1l1 - mad1 mitotic arrest deficient-like 1 (yeast), Bub1b - bub1 mitotic checkpoint serine/threonine kinase b, Ccnb1 - cyclin b1, Ube2c - ubiquitin-conjugating enzyme e2c, Plk1 - polo-like kinase 1, Cenpe - centromere protein e, Cdc6 - cell division cycle 6]
GO:2001222	regulation of neuron migration	0.000292	0.0166	5.33	17529	41	562	7	[Cdh1 - cadherin 1, Il1r1 - interleukin 1 receptor, type i, Gsk3b - glycogen synthase kinase 3 beta, Flrt2 - fibronectin leucine rich transmembrane protein 2, Flna - filamin a, alpha, Reln - reelin, Kif20b - kinesin family member 20b]
GO:0032268	regulation of cellular protein metabolic process	0.000297	0.0168	1.39	17529	2288	562	102	[Dusp4 - dual specificity phosphatase 4, Nf1 - neurofibromin 1, Gpr37l1 - g protein-coupled receptor 37-like 1, Rdx - radixin, Rc3h1 - ring finger and ccch-type domains 1, Ddit4 - dna-damage-inducible transcript 4, Birc6 - baculoviral iap repeat-containing 6, Ctsz - cathepsin z, Jdp2 - jun dimerization protein 2, Ngfr - nerve growth factor receptor, Arrb1 - arrestin, beta 1, Tgfb2 - transforming …
GO:0061572	actin filament bundle organization	0.000301	0.0169	4.62	17529	54	562	8	[Actn1 - actinin, alpha 1, Actn4 - actinin alpha 4, Src - v-src avian sarcoma (schmidt-ruppin a-2) viral oncogene homolog, Ezr - ezrin, Arrb1 - arrestin, beta 1, Dpysl3 - dihydropyrimidinase-like 3, Fscn1 - fascin homolog 1, actin bundling protein (strongylocentrotus purpuratus), Pawr - prkc, apoptosis, wt1, regulator]
GO:0051017	actin filament bundle assembly	0.000301	0.0169	4.62	17529	54	562	8	[Actn1 - actinin, alpha 1, Actn4 - actinin alpha 4, Src - v-src avian sarcoma (schmidt-ruppin a-2) viral oncogene homolog, Ezr - ezrin, Arrb1 - arrestin, beta 1, Dpysl3 - dihydropyrimidinase-like 3, Fscn1 - fascin homolog 1, actin bundling protein (strongylocentrotus purpuratus), Pawr - prkc, apoptosis, wt1, regulator]
GO:0050727	regulation of inflammatory response	0.000302	0.0168	2.33	17529	281	562	21	[Mefv - mediterranean fever, Fancd2 - fanconi anemia, complementation group d2, Wnt5a - wingless-type mmtv integration site family, member 5a, Mvk - mevalonate kinase, Apod - apolipoprotein d, Ptgis - prostaglandin i2 (prostacyclin) synthase, Acp5 - acid phosphatase 5, tartrate resistant, Tyro3 - tyro3 protein tyrosine kinase, Ets1 - v-ets avian erythroblastosis virus e26 oncogene homolog 1, Pla2…
GO:0022604	regulation of cell morphogenesis	0.000307	0.0171	2.01	17529	450	562	29	[Dock5 - dedicator of cytokinesis 5, Rdx - radixin, Myo10 - myosin x, Metrn - meteorin, glial cell differentiation regulator, Fmnl3 - formin-like 3, Sdc2 - syndecan 2, Coro1c - coronin, actin binding protein 1c, S100b - s100 calcium binding protein b, Sema5a - sema domain, seven thrombospondin repeats (type 1 and type 1-like), transmembrane domain (tm) and short cytoplasmic domain, (semaphorin) 5…
GO:0006974	cellular response to DNA damage stimulus	0.000308	0.0171	1.91	17529	539	562	33	[Fancd2 - fanconi anemia, complementation group d2, Cdc45 - cell division cycle 45, Ddit4 - dna-damage-inducible transcript 4, Eme1 - essential meiotic structure-specific endonuclease 1, Mdc1 - mediator of dna damage checkpoint 1, Taok1 - tao kinase 1, Recql4 - recq protein-like 4, Ercc2 - excision repair cross-complementing rodent repair deficiency, complementation group 2, Eya3 - eyes absent ho…
GO:0042493	response to drug	0.00031	0.0171	1.61	17529	1088	562	56	[Apod - apolipoprotein d, Nf1 - neurofibromin 1, Ddit4 - dna-damage-inducible transcript 4, Arrb1 - arrestin, beta 1, Ets1 - v-ets avian erythroblastosis virus e26 oncogene homolog 1, Tgfb2 - transforming growth factor, beta 2, Acaca - acetyl-coa carboxylase alpha, Eng - endoglin, L1cam - l1 cell adhesion molecule, Src - v-src avian sarcoma (schmidt-ruppin a-2) viral oncogene homolog, Itgb3 - int…
GO:0048818	positive regulation of hair follicle maturation	0.000312	0.0172	18.71	17529	5	562	3	[Wnt5a - wingless-type mmtv integration site family, member 5a, Tgfb2 - transforming growth factor, beta 2, Gal - galanin/gmap prepropeptide]
GO:0031345	negative regulation of cell projection organization	0.000314	0.0172	2.7	17529	185	562	16	[Wnt5a - wingless-type mmtv integration site family, member 5a, Rap1gap - rap1 gtpase-activating protein, Crmp1 - collapsin response mediator protein 1, Gsk3b - glycogen synthase kinase 3 beta, Ctsz - cathepsin z, Ngfr - nerve growth factor receptor, Dpysl3 - dihydropyrimidinase-like 3, Aatk - apoptosis-associated tyrosine kinase, Flna - filamin a, alpha, Sema5a - sema domain, seven thrombospondi…
GO:0007568	aging	0.000318	0.0173	2.1	17529	386	562	26	[Apod - apolipoprotein d, Polg - polymerase (dna directed), gamma, Tgfb2 - transforming growth factor, beta 2, Ercc2 - excision repair cross-complementing rodent repair deficiency, complementation group 2, Ednrb - endothelin receptor type b, Bglap - bone gamma-carboxyglutamate (gla) protein, Timp1 - timp metallopeptidase inhibitor 1, Eng - endoglin, Vdr - vitamin d (1,25- dihydroxyvitamin d3) rec…
GO:0001101	response to acid chemical	0.000318	0.0173	1.98	17529	473	562	30	[Acp5 - acid phosphatase 5, tartrate resistant, Tgfb2 - transforming growth factor, beta 2, Acaca - acetyl-coa carboxylase alpha, Wnt7b - wingless-type mmtv integration site family, member 7b, Col6a1 - collagen, type vi, alpha 1, L1cam - l1 cell adhesion molecule, Src - v-src avian sarcoma (schmidt-ruppin a-2) viral oncogene homolog, Arg1 - arginase, liver, Col18a1 - collagen, type xviii, alpha 1…
GO:0071456	cellular response to hypoxia	0.000325	0.0176	3.07	17529	132	562	13	[Brip1 - brca1 interacting protein c-terminal helicase 1, Ptgis - prostaglandin i2 (prostacyclin) synthase, S100b - s100 calcium binding protein b, Cox4i2 - cytochrome c oxidase subunit iv isoform 2 (lung), Hyou1 - hypoxia up-regulated 1, Serpine1 - serpin peptidase inhibitor, clade e (nexin, plasminogen activator inhibitor type 1), member 1, Ccnb1 - cyclin b1, Src - v-src avian sarcoma (schmidt-…
GO:0002064	epithelial cell development	0.000325	0.0176	3.07	17529	132	562	13	[Wnt5a - wingless-type mmtv integration site family, member 5a, Rdx - radixin, Foxc2 - forkhead box c2, Tjp2 - tight junction protein 2, Ezr - ezrin, Myo1e - myosin ie, Ampd2 - adenosine monophosphate deaminase 2, Cdh1 - cadherin 1, Sdc1 - syndecan 1, Flnb - filamin b, beta, Pdgfb - platelet-derived growth factor beta polypeptide, Cldn1 - claudin 1, Prdm1 - pr domain containing 1, with znf domain]
GO:0001953	negative regulation of cell-matrix adhesion	0.000326	0.0175	6.24	17529	30	562	6	[Rcc2 - regulator of chromosome condensation 2, Nf1 - neurofibromin 1, Apod - apolipoprotein d, Serpine1 - serpin peptidase inhibitor, clade e (nexin, plasminogen activator inhibitor type 1), member 1, Src - v-src avian sarcoma (schmidt-ruppin a-2) viral oncogene homolog, Coro1c - coronin, actin binding protein 1c]
GO:0001936	regulation of endothelial cell proliferation	0.000328	0.0176	3.47	17529	99	562	11	[Wnt5a - wingless-type mmtv integration site family, member 5a, Nf1 - neurofibromin 1, RGD1562037 - similar to otthump00000046255, Eng - endoglin, Nrarp - notch-regulated ankyrin repeat protein, Itgb3 - integrin, beta 3, Ngfr - nerve growth factor receptor, Pdgfb - platelet-derived growth factor beta polypeptide, Arg1 - arginase, liver, Nr2f2 - nuclear receptor subfamily 2, group f, member 2, Sem…
GO:0090090	negative regulation of canonical Wnt signaling pathway	0.000328	0.0175	3.47	17529	99	562	11	[Wnt5a - wingless-type mmtv integration site family, member 5a, Sostdc1 - sclerostin domain containing 1, Tbx18 - t-box18, Gli1 - gli family zinc finger 1, Cdh1 - cadherin 1, Tnn - tenascin n, Kremen1 - kringle containing transmembrane protein 1, Nkd1 - naked cuticle homolog 1 (drosophila), Wnt5b - wingless-type mmtv integration site family, member 5b, Snai2 - snail family zinc finger 2, Sox10 - …
GO:0016055	Wnt signaling pathway	0.000334	0.0178	2.68	17529	186	562	16	[Wnt5a - wingless-type mmtv integration site family, member 5a, Gli1 - gli family zinc finger 1, Mgat3 - mannosyl (beta-1,4-)-glycoprotein beta-1,4-n-acetylglucosaminyltransferase, Sostdc1 - sclerostin domain containing 1, Strn - striatin, calmodulin binding protein, Gsk3b - glycogen synthase kinase 3 beta, Wnt5b - wingless-type mmtv integration site family, member 5b, Mark2 - map/microtubule aff…
GO:0045664	regulation of neuron differentiation	0.000339	0.018	1.79	17529	680	562	39	[Nf1 - neurofibromin 1, Gpr37l1 - g protein-coupled receptor 37-like 1, Rap1gap - rap1 gtpase-activating protein, Metrn - meteorin, glial cell differentiation regulator, Ctsz - cathepsin z, Sdc2 - syndecan 2, Ngfr - nerve growth factor receptor, Shank1 - sh3 and multiple ankyrin repeat domains 1, Arsb - arylsulfatase b, Ednrb - endothelin receptor type b, Sema5a - sema domain, seven thrombospondi…
GO:0051223	regulation of protein transport	0.000344	0.0182	1.73	17529	775	562	43	[Apod - apolipoprotein d, Nf1 - neurofibromin 1, Slc9b2 - solute carrier family 9, subfamily b (nha2, cation proton antiporter 2), member 2, Ica1 - islet cell autoantigen 1, Arrb1 - arrestin, beta 1, Llgl1 - lethal giant larvae homolog 1 (drosophila), Tgfb2 - transforming growth factor, beta 2, Supt6h - suppressor of ty 6 homolog (s. cerevisiae), Pfkl - phosphofructokinase, liver, Sema5a - sema d…
GO:2000816	negative regulation of mitotic sister chromatid separation	0.000346	0.0182	7.8	17529	20	562	5	[Mad1l1 - mad1 mitotic arrest deficient-like 1 (yeast), Bub1b - bub1 mitotic checkpoint serine/threonine kinase b, Pttg1 - pituitary tumor-transforming 1, Plk1 - polo-like kinase 1, Cenpe - centromere protein e]
GO:0002063	chondrocyte development	0.000346	0.0182	7.8	17529	20	562	5	[Poc1a - poc1 centriolar protein homolog a (chlamydomonas), Runx2 - runt-related transcription factor 2, Col27a1 - collagen, type xxvii, alpha 1, Col11a1 - collagen, type xi, alpha 1, Chst11 - carbohydrate (chondroitin 4) sulfotransferase 11]
GO:0048514	blood vessel morphogenesis	0.000358	0.0187	3.43	17529	100	562	11	[Cyp1b1 - cytochrome p450, family 1, subfamily b, polypeptide 1, Nf1 - neurofibromin 1, Eng - endoglin, Tbx2 - t-box 2, Hey1 - hairy/enhancer-of-split related with yrpw motif 1, Foxc2 - forkhead box c2, Tgfb2 - transforming growth factor, beta 2, Pdgfb - platelet-derived growth factor beta polypeptide, Flt1 - fms-related tyrosine kinase 1, Nr2f2 - nuclear receptor subfamily 2, group f, member 2, …
GO:0044770	cell cycle phase transition	0.000377	0.0197	3.2	17529	117	562	12	[Ccne1 - cyclin e1, Foxm1 - forkhead box m1, Nfatc1 - nuclear factor of activated t-cells, cytoplasmic, calcineurin-dependent 1, Birc5 - baculoviral iap repeat-containing 5, Mastl - microtubule associated serine/threonine kinase-like, Cdc7 - cell division cycle 7, Bub1b - bub1 mitotic checkpoint serine/threonine kinase b, Cdkn2c - cyclin-dependent kinase inhibitor 2c (p18, inhibits cdk4), Ube2c -…
GO:0009880	embryonic pattern specification	0.000389	0.0202	4.46	17529	56	562	8	[Efnb1 - ephrin b1, Wnt5a - wingless-type mmtv integration site family, member 5a, Nrarp - notch-regulated ankyrin repeat protein, Stil - scl/tal1 interrupting locus, Meox1 - mesenchyme homeobox 1, Satb2 - satb homeobox 2, Smad4 - smad family member 4, Ptch1 - patched 1]
GO:0032963	collagen metabolic process	0.000393	0.0204	6.04	17529	31	562	6	[Mmp9 - matrix metallopeptidase 9, Mmp13 - matrix metallopeptidase 13, Col5a1 - collagen, type v, alpha 1, Ctsk - cathepsin k, Arg1 - arginase, liver, Mmp3 - matrix metallopeptidase 3]
GO:0051960	regulation of nervous system development	0.000395	0.0204	1.66	17529	901	562	48	[Nf1 - neurofibromin 1, Gpr37l1 - g protein-coupled receptor 37-like 1, Metrn - meteorin, glial cell differentiation regulator, Rap1gap - rap1 gtpase-activating protein, Ctsz - cathepsin z, Sdc2 - syndecan 2, Ngfr - nerve growth factor receptor, S100b - s100 calcium binding protein b, Arsb - arylsulfatase b, Shank1 - sh3 and multiple ankyrin repeat domains 1, Ednrb - endothelin receptor type b, S…
GO:0045995	regulation of embryonic development	0.000407	0.021	3.17	17529	118	562	12	[Wnt5a - wingless-type mmtv integration site family, member 5a, Tbx18 - t-box18, Rbm19 - rna binding motif protein 19, Lama4 - laminin, alpha 4, Tbx2 - t-box 2, Col5a1 - collagen, type v, alpha 1, Nrarp - notch-regulated ankyrin repeat protein, Racgap1 - rac gtpase-activating protein 1, Pdgfb - platelet-derived growth factor beta polypeptide, Mbp - myelin basic protein, Ptk7 - protein tyrosine ki…
GO:0009636	response to toxic substance	0.000429	0.022	1.83	17529	595	562	35	[Hnrnpa1 - heterogeneous nuclear ribonucleoprotein a1, Plk1 - polo-like kinase 1, Ets1 - v-ets avian erythroblastosis virus e26 oncogene homolog 1, Bglap - bone gamma-carboxyglutamate (gla) protein, Setd7 - set domain containing (lysine methyltransferase) 7, Cyp1b1 - cytochrome p450, family 1, subfamily b, polypeptide 1, L1cam - l1 cell adhesion molecule, Src - v-src avian sarcoma (schmidt-ruppin…
GO:0043085	positive regulation of catalytic activity	0.000434	0.0222	1.54	17529	1280	562	63	[Elmo1 - engulfment and cell motility 1, Nf1 - neurofibromin 1, Ngfr - nerve growth factor receptor, Arrb1 - arrestin, beta 1, Plk1 - polo-like kinase 1, Chtf18 - ctf18, chromosome transmission fidelity factor 18 homolog (s. cerevisiae), Tgfb2 - transforming growth factor, beta 2, Map3k6 - mitogen-activated protein kinase kinase kinase 6, Arhgap23 - rho gtpase activating protein 23, Angpt1 - angi…
GO:0065009	regulation of molecular function	0.00044	0.0224	1.33	17529	2892	562	123	[Dusp4 - dual specificity phosphatase 4, Nf1 - neurofibromin 1, Rdx - radixin, Birc6 - baculoviral iap repeat-containing 6, Ctsz - cathepsin z, Ngfr - nerve growth factor receptor, Chtf18 - ctf18, chromosome transmission fidelity factor 18 homolog (s. cerevisiae), Arrb1 - arrestin, beta 1, Tgfb2 - transforming growth factor, beta 2, Ercc2 - excision repair cross-complementing rodent repair defici…
GO:0051984	positive regulation of chromosome segregation	0.000442	0.0225	7.43	17529	21	562	5	[Rcc2 - regulator of chromosome condensation 2, Ccnb1 - cyclin b1, Rad18 - rad18 homolog (s. cerevisiae), Cenpe - centromere protein e, Cdc6 - cell division cycle 6]
GO:1905819	negative regulation of chromosome separation	0.000442	0.0224	7.43	17529	21	562	5	[Mad1l1 - mad1 mitotic arrest deficient-like 1 (yeast), Bub1b - bub1 mitotic checkpoint serine/threonine kinase b, Pttg1 - pituitary tumor-transforming 1, Plk1 - polo-like kinase 1, Cenpe - centromere protein e]
GO:0051797	regulation of hair follicle development	0.000442	0.0223	7.43	17529	21	562	5	[Wnt5a - wingless-type mmtv integration site family, member 5a, Ngfr - nerve growth factor receptor, Tgfb2 - transforming growth factor, beta 2, Gal - galanin/gmap prepropeptide, Smad4 - smad family member 4]
GO:0010977	negative regulation of neuron projection development	0.000444	0.0223	2.84	17529	154	562	14	[Wnt5a - wingless-type mmtv integration site family, member 5a, Crmp1 - collapsin response mediator protein 1, Gsk3b - glycogen synthase kinase 3 beta, Ctsz - cathepsin z, Ngfr - nerve growth factor receptor, Dpysl3 - dihydropyrimidinase-like 3, Flna - filamin a, alpha, Aatk - apoptosis-associated tyrosine kinase, Sema5a - sema domain, seven thrombospondin repeats (type 1 and type 1-like), transm…
GO:0033273	response to vitamin	0.000444	0.0222	2.84	17529	154	562	14	[Brip1 - brca1 interacting protein c-terminal helicase 1, Acp5 - acid phosphatase 5, tartrate resistant, Pla2g4a - phospholipase a2, group iva (cytosolic, calcium-dependent), Tgfb2 - transforming growth factor, beta 2, Bglap - bone gamma-carboxyglutamate (gla) protein, Ccne1 - cyclin e1, Tyms - thymidylate synthetase, Mmp9 - matrix metallopeptidase 9, Angpt1 - angiopoietin 1, Vdr - vitamin d (1,2…
GO:0051049	regulation of transport	0.000454	0.0227	1.43	17529	1857	562	85	[Apod - apolipoprotein d, Nf1 - neurofibromin 1, Tpcn1 - two pore segment channel 1, Rdx - radixin, Ngfr - nerve growth factor receptor, Arrb1 - arrestin, beta 1, Tgfb2 - transforming growth factor, beta 2, Ttyh1 - tweety homolog 1 (drosophila), Sema5a - sema domain, seven thrombospondin repeats (type 1 and type 1-like), transmembrane domain (tm) and short cytoplasmic domain, (semaphorin) 5a, Edn…
GO:0045665	negative regulation of neuron differentiation	0.000462	0.023	2.44	17529	230	562	18	[Wnt5a - wingless-type mmtv integration site family, member 5a, Gpr37l1 - g protein-coupled receptor 37-like 1, Crmp1 - collapsin response mediator protein 1, Rap1gap - rap1 gtpase-activating protein, Gsk3b - glycogen synthase kinase 3 beta, Ctsz - cathepsin z, Ngfr - nerve growth factor receptor, Dpysl3 - dihydropyrimidinase-like 3, Flna - filamin a, alpha, Aatk - apoptosis-associated tyrosine k…
GO:0006935	chemotaxis	0.000468	0.0232	2.37	17529	250	562	19	[Wnt5a - wingless-type mmtv integration site family, member 5a, Slit3 - slit homolog 3 (drosophila), Flrt2 - fibronectin leucine rich transmembrane protein 2, Myo9b - myosin ixb, Tgfb2 - transforming growth factor, beta 2, Ednrb - endothelin receptor type b, Sema5a - sema domain, seven thrombospondin repeats (type 1 and type 1-like), transmembrane domain (tm) and short cytoplasmic domain, (semaph…
GO:0045839	negative regulation of mitotic nuclear division	0.000471	0.0233	5.85	17529	32	562	6	[Tom1l1 - target of myb1 (chicken)-like 1, Mad1l1 - mad1 mitotic arrest deficient-like 1 (yeast), Bub1b - bub1 mitotic checkpoint serine/threonine kinase b, Pttg1 - pituitary tumor-transforming 1, Plk1 - polo-like kinase 1, Cenpe - centromere protein e]
GO:0043393	regulation of protein binding	0.000473	0.0233	2.51	17529	211	562	17	[Wnt5a - wingless-type mmtv integration site family, member 5a, Gsk3b - glycogen synthase kinase 3 beta, Crmp1 - collapsin response mediator protein 1, Ctsz - cathepsin z, Ica1 - islet cell autoantigen 1, Arrb1 - arrestin, beta 1, Plk1 - polo-like kinase 1, Itga4 - integrin, alpha 4, Mfng - mfng o-fucosylpeptide 3-beta-n-acetylglucosaminyltransferase, Mmp9 - matrix metallopeptidase 9, Angpt1 - an…
GO:0045682	regulation of epidermis development	0.000473	0.0233	3.9	17529	72	562	9	[Wnt5a - wingless-type mmtv integration site family, member 5a, Hey1 - hairy/enhancer-of-split related with yrpw motif 1, Ngfr - nerve growth factor receptor, Tgfb2 - transforming growth factor, beta 2, Vdr - vitamin d (1,25- dihydroxyvitamin d3) receptor, Ppard - peroxisome proliferator-activated receptor delta, Gal - galanin/gmap prepropeptide, Smad4 - smad family member 4, Ptch1 - patched 1]
GO:0006793	phosphorus metabolic process	0.000474	0.0232	1.45	17529	1674	562	78	[Lpcat1 - lysophosphatidylcholine acyltransferase 1, Dusp4 - dual specificity phosphatase 4, Nf1 - neurofibromin 1, Srpk1 - srsf protein kinase 1, Rrm2 - ribonucleotide reductase m2, Bub1b - bub1 mitotic checkpoint serine/threonine kinase b, Tyro3 - tyro3 protein tyrosine kinase, Plk1 - polo-like kinase 1, Plcb3 - phospholipase c, beta 3 (phosphatidylinositol-specific), Tgfb2 - transforming growt…
GO:0071383	cellular response to steroid hormone stimulus	0.000475	0.0232	3.12	17529	120	562	12	[Srd5a1 - steroid-5-alpha-reductase, alpha polypeptide 1 (3-oxo-5 alpha-steroid delta 4-dehydrogenase alpha 1), Cyp1b1 - cytochrome p450, family 1, subfamily b, polypeptide 1, Nf1 - neurofibromin 1, Serpine1 - serpin peptidase inhibitor, clade e (nexin, plasminogen activator inhibitor type 1), member 1, L1cam - l1 cell adhesion molecule, Hey1 - hairy/enhancer-of-split related with yrpw motif 1, S…
GO:0001889	liver development	0.000475	0.0231	2.6	17529	192	562	16	[Srd5a1 - steroid-5-alpha-reductase, alpha polypeptide 1 (3-oxo-5 alpha-steroid delta 4-dehydrogenase alpha 1), Gli1 - gli family zinc finger 1, Nf1 - neurofibromin 1, Foxm1 - forkhead box m1, Fscn1 - fascin homolog 1, actin bundling protein (strongylocentrotus purpuratus), Ncl - nucleolin, Ccne1 - cyclin e1, Tyms - thymidylate synthetase, Bdh1 - 3-hydroxybutyrate dehydrogenase, type 1, Tk1 - thy…
GO:0010720	positive regulation of cell development	0.000485	0.0236	1.84	17529	576	562	34	[Dock5 - dedicator of cytokinesis 5, Nf1 - neurofibromin 1, Metrn - meteorin, glial cell differentiation regulator, Slc9b2 - solute carrier family 9, subfamily b (nha2, cation proton antiporter 2), member 2, Ngfr - nerve growth factor receptor, Shank1 - sh3 and multiple ankyrin repeat domains 1, Arsb - arylsulfatase b, Sema5a - sema domain, seven thrombospondin repeats (type 1 and type 1-like), t…
GO:0045931	positive regulation of mitotic cell cycle	0.0005	0.0242	2.94	17529	138	562	13	[Rcc2 - regulator of chromosome condensation 2, Rdx - radixin, Cdc45 - cell division cycle 45, Birc5 - baculoviral iap repeat-containing 5, Cdc7 - cell division cycle 7, Ube2c - ubiquitin-conjugating enzyme e2c, Ccnb1 - cyclin b1, Nusap1 - nucleolar and spindle associated protein 1, Pdgfb - platelet-derived growth factor beta polypeptide, Hyal1 - hyaluronoglucosaminidase 1, Dtl - denticleless e3 …
GO:0007167	enzyme linked receptor protein signaling pathway	0.000534	0.0258	1.92	17529	488	562	30	[Efna2 - ephrin a2, Sostdc1 - sclerostin domain containing 1, Ddit4 - dna-damage-inducible transcript 4, Tgfb2 - transforming growth factor, beta 2, Lif - leukemia inhibitory factor, Dok5 - docking protein 5, Runx2 - runt-related transcription factor 2, Angpt1 - angiopoietin 1, Eng - endoglin, Cspg4 - chondroitin sulfate proteoglycan 4, Itgb3 - integrin, beta 3, Src - v-src avian sarcoma (schmidt…
GO:0000302	response to reactive oxygen species	0.000539	0.0259	2.41	17529	233	562	18	[Apod - apolipoprotein d, Gsk3b - glycogen synthase kinase 3 beta, Ect2 - epithelial cell transforming sequence 2 oncogene, Ets1 - v-ets avian erythroblastosis virus e26 oncogene homolog 1, Pla2g4a - phospholipase a2, group iva (cytosolic, calcium-dependent), Lcn2 - lipocalin 2, Mmp9 - matrix metallopeptidase 9, Cyp1b1 - cytochrome p450, family 1, subfamily b, polypeptide 1, Sdc1 - syndecan 1, Se…
GO:0050768	negative regulation of neurogenesis	0.000549	0.0263	2.23	17529	294	562	21	[Wnt5a - wingless-type mmtv integration site family, member 5a, Nf1 - neurofibromin 1, Gpr37l1 - g protein-coupled receptor 37-like 1, Crmp1 - collapsin response mediator protein 1, Rap1gap - rap1 gtpase-activating protein, Gsk3b - glycogen synthase kinase 3 beta, Ctsz - cathepsin z, Ngfr - nerve growth factor receptor, Dpysl3 - dihydropyrimidinase-like 3, Flna - filamin a, alpha, Aatk - apoptosi…
GO:0032496	response to lipopolysaccharide	0.000559	0.0267	2.06	17529	379	562	25	[Acp5 - acid phosphatase 5, tartrate resistant, Ngfr - nerve growth factor receptor, Ednrb - endothelin receptor type b, Ncl - nucleolin, Ctsg - cathepsin g, Src - v-src avian sarcoma (schmidt-ruppin a-2) viral oncogene homolog, Lbp - lipopolysaccharide binding protein, Ppard - peroxisome proliferator-activated receptor delta, Arg1 - arginase, liver, Ngf - nerve growth factor (beta polypeptide), …
GO:0045684	positive regulation of epidermis development	0.00056	0.0267	5.67	17529	33	562	6	[Wnt5a - wingless-type mmtv integration site family, member 5a, Tgfb2 - transforming growth factor, beta 2, Vdr - vitamin d (1,25- dihydroxyvitamin d3) receptor, Ppard - peroxisome proliferator-activated receptor delta, Gal - galanin/gmap prepropeptide, Ptch1 - patched 1]
GO:1905114	cell surface receptor signaling pathway involved in cell-cell signaling	0.000564	0.0268	2.56	17529	195	562	16	[Wnt5a - wingless-type mmtv integration site family, member 5a, Mgat3 - mannosyl (beta-1,4-)-glycoprotein beta-1,4-n-acetylglucosaminyltransferase, Sostdc1 - sclerostin domain containing 1, Gli1 - gli family zinc finger 1, Strn - striatin, calmodulin binding protein, Gsk3b - glycogen synthase kinase 3 beta, Wnt5b - wingless-type mmtv integration site family, member 5b, Mark2 - map/microtubule aff…
GO:0006357	regulation of transcription from RNA polymerase II promoter	0.000565	0.0267	1.43	17529	1790	562	82	[Gsc - goosecoid homeobox, Gli1 - gli family zinc finger 1, Ttc21b - tetratricopeptide repeat domain 21b, Sostdc1 - sclerostin domain containing 1, Nfatc1 - nuclear factor of activated t-cells, cytoplasmic, calcineurin-dependent 1, Erg - v-ets avian erythroblastosis virus e26 oncogene, Mybl2 - myeloblastosis oncogene-like 2, Jdp2 - jun dimerization protein 2, Ngfr - nerve growth factor receptor, …
GO:0070201	regulation of establishment of protein localization	0.000567	0.0268	1.69	17529	794	562	43	[Apod - apolipoprotein d, Nf1 - neurofibromin 1, Slc9b2 - solute carrier family 9, subfamily b (nha2, cation proton antiporter 2), member 2, Ica1 - islet cell autoantigen 1, Arrb1 - arrestin, beta 1, Llgl1 - lethal giant larvae homolog 1 (drosophila), Tgfb2 - transforming growth factor, beta 2, Supt6h - suppressor of ty 6 homolog (s. cerevisiae), Pfkl - phosphofructokinase, liver, Sema5a - sema d…
GO:0032880	regulation of protein localization	0.000568	0.0267	1.6	17529	1015	562	52	[Nf1 - neurofibromin 1, Apod - apolipoprotein d, Rdx - radixin, Ngfr - nerve growth factor receptor, Arrb1 - arrestin, beta 1, Tgfb2 - transforming growth factor, beta 2, Sema5a - sema domain, seven thrombospondin repeats (type 1 and type 1-like), transmembrane domain (tm) and short cytoplasmic domain, (semaphorin) 5a, Lif - leukemia inhibitory factor, Angpt1 - angiopoietin 1, Src - v-src avian s…
GO:0048678	response to axon injury	0.000581	0.0272	3.79	17529	74	562	9	[Apod - apolipoprotein d, Mtr - 5-methyltetrahydrofolate-homocysteine methyltransferase, Uck2 - uridine-cytidine kinase 2, Dpysl3 - dihydropyrimidinase-like 3, Pdgfb - platelet-derived growth factor beta polypeptide, Dhfr - dihydrofolate reductase, Arg1 - arginase, liver, Chl1 - cell adhesion molecule l1-like, Reln - reelin]
GO:0010628	positive regulation of gene expression	0.000586	0.0274	1.43	17529	1739	562	80	[Gli1 - gli family zinc finger 1, Nfatc1 - nuclear factor of activated t-cells, cytoplasmic, calcineurin-dependent 1, Rdx - radixin, Mybl2 - myeloblastosis oncogene-like 2, Erg - v-ets avian erythroblastosis virus e26 oncogene, Ngfr - nerve growth factor receptor, Arrb1 - arrestin, beta 1, Lhx2 - lim homeobox 2, Creb5 - camp responsive element binding protein 5, Ets1 - v-ets avian erythroblastosi…
GO:0051895	negative regulation of focal adhesion assembly	0.000593	0.0277	9.6	17529	13	562	4	[Rcc2 - regulator of chromosome condensation 2, Apod - apolipoprotein d, Src - v-src avian sarcoma (schmidt-ruppin a-2) viral oncogene homolog, Coro1c - coronin, actin binding protein 1c]
GO:1902337	regulation of apoptotic process involved in morphogenesis	0.000593	0.0276	9.6	17529	13	562	4	[Foxc2 - forkhead box c2, Tgfb2 - transforming growth factor, beta 2, Vdr - vitamin d (1,25- dihydroxyvitamin d3) receptor, Pml - promyelocytic leukemia]
GO:0051338	regulation of transferase activity	0.000604	0.028	1.66	17529	845	562	45	[Tom1l1 - target of myb1 (chicken)-like 1, Dusp4 - dual specificity phosphatase 4, Nf1 - neurofibromin 1, Chtf18 - ctf18, chromosome transmission fidelity factor 18 homolog (s. cerevisiae), Dbndd2 - dysbindin (dystrobrevin binding protein 1) domain containing 2, Arrb1 - arrestin, beta 1, Plk1 - polo-like kinase 1, Taok1 - tao kinase 1, Coro1c - coronin, actin binding protein 1c, Tgfb2 - transform…
GO:0071460	cellular response to cell-matrix adhesion	0.00061	0.0282	15.6	17529	6	562	3	[Mmp9 - matrix metallopeptidase 9, Fscn1 - fascin homolog 1, actin bundling protein (strongylocentrotus purpuratus), Mmp3 - matrix metallopeptidase 3]
GO:0051987	positive regulation of attachment of spindle microtubules to kinetochore	0.00061	0.0281	15.6	17529	6	562	3	[Rcc2 - regulator of chromosome condensation 2, Ccnb1 - cyclin b1, Cenpe - centromere protein e]
GO:0071393	cellular response to progesterone stimulus	0.00061	0.028	15.6	17529	6	562	3	[Cyp1b1 - cytochrome p450, family 1, subfamily b, polypeptide 1, Src - v-src avian sarcoma (schmidt-ruppin a-2) viral oncogene homolog, Sox10 - sry (sex determining region y)-box 10]
GO:0019087	transformation of host cell by virus	0.00061	0.0279	15.6	17529	6	562	3	[Tyms - thymidylate synthetase, Mmp9 - matrix metallopeptidase 9, Hnrnpa1 - heterogeneous nuclear ribonucleoprotein a1]
GO:0072307	regulation of metanephric nephron tubule epithelial cell differentiation	0.00061	0.0278	15.6	17529	6	562	3	[Fat4 - fat atypical cadherin 4, Yap1 - yes-associated protein 1, Lif - leukemia inhibitory factor]
GO:0048702	embryonic neurocranium morphogenesis	0.00061	0.0277	15.6	17529	6	562	3	[Ndst1 - n-deacetylase/n-sulfotransferase (heparan glucosaminyl) 1, Med12 - mediator complex subunit 12, Tgfb2 - transforming growth factor, beta 2]
GO:0043549	regulation of kinase activity	0.000615	0.0279	1.71	17529	749	562	41	[Tom1l1 - target of myb1 (chicken)-like 1, Dusp4 - dual specificity phosphatase 4, Nf1 - neurofibromin 1, Plk1 - polo-like kinase 1, Arrb1 - arrestin, beta 1, Dbndd2 - dysbindin (dystrobrevin binding protein 1) domain containing 2, Tgfb2 - transforming growth factor, beta 2, Coro1c - coronin, actin binding protein 1c, Taok1 - tao kinase 1, Nr2f2 - nuclear receptor subfamily 2, group f, member 2, …
GO:0007044	cell-substrate junction assembly	0.000662	0.0299	5.5	17529	34	562	6	[Rcc2 - regulator of chromosome condensation 2, Actn1 - actinin, alpha 1, Thy1 - thy-1 cell surface antigen, Itgb3 - integrin, beta 3, Itga5 - integrin, alpha 5 (fibronectin receptor, alpha polypeptide), Itga2 - integrin, alpha 2]
GO:0071559	response to transforming growth factor beta	0.000662	0.0299	3.43	17529	91	562	10	[Wnt5a - wingless-type mmtv integration site family, member 5a, Eng - endoglin, Serpine1 - serpin peptidase inhibitor, clade e (nexin, plasminogen activator inhibitor type 1), member 1, Il1r1 - interleukin 1 receptor, type i, L1cam - l1 cell adhesion molecule, Src - v-src avian sarcoma (schmidt-ruppin a-2) viral oncogene homolog, Cldn1 - claudin 1, Arg1 - arginase, liver, Runx3 - runt-related tra…
GO:1905039	carboxylic acid transmembrane transport	0.000662	0.0298	3.43	17529	91	562	10	[Slc6a9 - solute carrier family 6 (neurotransmitter transporter, glycine), member 9, Slc6a17 - solute carrier family 6 (neutral amino acid transporter), member 17, Slc25a10 - solute carrier family 25 (mitochondrial carrier; dicarboxylate transporter), member 10, Slc6a15 - solute carrier family 6 (neutral amino acid transporter), member 15, Slc16a11 - solute carrier family 16, member 11 (monocarbo…
GO:0044772	mitotic cell cycle phase transition	0.000693	0.0311	3.18	17529	108	562	11	[Ccne1 - cyclin e1, Foxm1 - forkhead box m1, Nfatc1 - nuclear factor of activated t-cells, cytoplasmic, calcineurin-dependent 1, Birc5 - baculoviral iap repeat-containing 5, Mastl - microtubule associated serine/threonine kinase-like, Bub1b - bub1 mitotic checkpoint serine/threonine kinase b, Cdkn2c - cyclin-dependent kinase inhibitor 2c (p18, inhibits cdk4), Ube2c - ubiquitin-conjugating enzyme …
GO:0033048	negative regulation of mitotic sister chromatid segregation	0.000693	0.031	6.78	17529	23	562	5	[Mad1l1 - mad1 mitotic arrest deficient-like 1 (yeast), Bub1b - bub1 mitotic checkpoint serine/threonine kinase b, Pttg1 - pituitary tumor-transforming 1, Plk1 - polo-like kinase 1, Cenpe - centromere protein e]
GO:0036294	cellular response to decreased oxygen levels	0.000702	0.0313	2.84	17529	143	562	13	[Brip1 - brca1 interacting protein c-terminal helicase 1, Ptgis - prostaglandin i2 (prostacyclin) synthase, S100b - s100 calcium binding protein b, Cox4i2 - cytochrome c oxidase subunit iv isoform 2 (lung), Hyou1 - hypoxia up-regulated 1, Serpine1 - serpin peptidase inhibitor, clade e (nexin, plasminogen activator inhibitor type 1), member 1, Ccnb1 - cyclin b1, Src - v-src avian sarcoma (schmidt-…
GO:0006725	cellular aromatic compound metabolic process	0.000707	0.0314	1.31	17529	2871	562	121	[Mybl2 - myeloblastosis oncogene-like 2, Rc3h1 - ring finger and ccch-type domains 1, Jdp2 - jun dimerization protein 2, Chtf18 - ctf18, chromosome transmission fidelity factor 18 homolog (s. cerevisiae), Arrb1 - arrestin, beta 1, Tgfb2 - transforming growth factor, beta 2, Ercc2 - excision repair cross-complementing rodent repair deficiency, complementation group 2, Nr2f2 - nuclear receptor subf…
GO:1901888	regulation of cell junction assembly	0.000707	0.0313	3.69	17529	76	562	9	[Rcc2 - regulator of chromosome condensation 2, Apod - apolipoprotein d, Thy1 - thy-1 cell surface antigen, Src - v-src avian sarcoma (schmidt-ruppin a-2) viral oncogene homolog, Fmn1 - formin 1, Coro1c - coronin, actin binding protein 1c, Cldn1 - claudin 1, Snai2 - snail family zinc finger 2, Snai1 - snail family zinc finger 1]
GO:0071822	protein complex subunit organization	0.000725	0.032	1.58	17529	1026	562	52	[Tppp - tubulin polymerization promoting protein, Nf1 - neurofibromin 1, Rrm2 - ribonucleotide reductase m2, Col5a1 - collagen, type v, alpha 1, Ddit4 - dna-damage-inducible transcript 4, Dnal1 - dynein, axonemal, light chain 1, Tgfb2 - transforming growth factor, beta 2, Kctd10 - potassium channel tetramerization domain containing 10, Acaca - acetyl-coa carboxylase alpha, Tgm2 - transglutaminase…
GO:0031100	animal organ regeneration	0.00075	0.033	2.82	17529	144	562	13	[Gli1 - gli family zinc finger 1, Mki67 - antigen identified by monoclonal antibody ki-67, Ncl - nucleolin, Lif - leukemia inhibitory factor, Ccne1 - cyclin e1, Tyms - thymidylate synthetase, Angpt1 - angiopoietin 1, Cldn1 - claudin 1, Flt1 - fms-related tyrosine kinase 1, Aldoc - aldolase c, fructose-bisphosphate, Cxcl5 - chemokine (c-x-c motif) ligand 5, Ptch1 - patched 1, Socs3 - suppressor of…
GO:0007566	embryo implantation	0.000789	0.0347	4.55	17529	48	562	7	[Mmp9 - matrix metallopeptidase 9, Sostdc1 - sclerostin domain containing 1, Cdh1 - cadherin 1, Ptgis - prostaglandin i2 (prostacyclin) synthase, Itgb3 - integrin, beta 3, Ppard - peroxisome proliferator-activated receptor delta, Lif - leukemia inhibitory factor]
GO:1903046	meiotic cell cycle process	0.0008	0.0351	2.8	17529	145	562	13	[Brip1 - brca1 interacting protein c-terminal helicase 1, Fancd2 - fanconi anemia, complementation group d2, Bub1b - bub1 mitotic checkpoint serine/threonine kinase b, Fbxo5 - f-box protein 5, Eme1 - essential meiotic structure-specific endonuclease 1, Chtf18 - ctf18, chromosome transmission fidelity factor 18 homolog (s. cerevisiae), Plk1 - polo-like kinase 1, Ccne1 - cyclin e1, Smc4 - structura…
GO:0071495	cellular response to endogenous stimulus	0.000808	0.0353	1.64	17529	857	562	45	[Nf1 - neurofibromin 1, Rdx - radixin, Hnrnpa1 - heterogeneous nuclear ribonucleoprotein a1, Rap1gap - rap1 gtpase-activating protein, Eme1 - essential meiotic structure-specific endonuclease 1, Ddit4 - dna-damage-inducible transcript 4, Ngfr - nerve growth factor receptor, Acaca - acetyl-coa carboxylase alpha, Ncl - nucleolin, Bglap - bone gamma-carboxyglutamate (gla) protein, Cdc6 - cell divisi…
GO:1904748	regulation of apoptotic process involved in development	0.00081	0.0353	8.91	17529	14	562	4	[Foxc2 - forkhead box c2, Tgfb2 - transforming growth factor, beta 2, Vdr - vitamin d (1,25- dihydroxyvitamin d3) receptor, Pml - promyelocytic leukemia]
GO:0046599	regulation of centriole replication	0.00081	0.0352	8.91	17529	14	562	4	[Mdm1 - mdm1 nuclear protein homolog (mouse), Plk4 - polo-like kinase 4, Stil - scl/tal1 interrupting locus, Cep76 - centrosomal protein 76]
GO:0048608	reproductive structure development	0.000827	0.0358	2.07	17529	346	562	23	[Srd5a1 - steroid-5-alpha-reductase, alpha polypeptide 1 (3-oxo-5 alpha-steroid delta 4-dehydrogenase alpha 1), Brip1 - brca1 interacting protein c-terminal helicase 1, Wnt5a - wingless-type mmtv integration site family, member 5a, Pbrm1 - polybromo 1, Gli1 - gli family zinc finger 1, Rdh10 - retinol dehydrogenase 10 (all-trans), Hnrnpa1 - heterogeneous nuclear ribonucleoprotein a1, Birc6 - bacul…
GO:0010558	negative regulation of macromolecule biosynthetic process	0.00083	0.0359	1.5	17529	1287	562	62	[Gsc - goosecoid homeobox, Nfatc1 - nuclear factor of activated t-cells, cytoplasmic, calcineurin-dependent 1, Rc3h1 - ring finger and ccch-type domains 1, Jdp2 - jun dimerization protein 2, Plk1 - polo-like kinase 1, Ago2 - argonaute risc catalytic component 2, Nr2f2 - nuclear receptor subfamily 2, group f, member 2, Ednrb - endothelin receptor type b, Khsrp - kh-type splicing regulatory protein…
GO:2000113	negative regulation of cellular macromolecule biosynthetic process	0.000838	0.0361	1.51	17529	1236	562	60	[Gsc - goosecoid homeobox, Nfatc1 - nuclear factor of activated t-cells, cytoplasmic, calcineurin-dependent 1, Rc3h1 - ring finger and ccch-type domains 1, Jdp2 - jun dimerization protein 2, Plk1 - polo-like kinase 1, Ago2 - argonaute risc catalytic component 2, Nr2f2 - nuclear receptor subfamily 2, group f, member 2, Ednrb - endothelin receptor type b, Khsrp - kh-type splicing regulatory protein…
GO:1990776	response to angiotensin	0.000853	0.0366	6.5	17529	24	562	5	[Brip1 - brca1 interacting protein c-terminal helicase 1, Serpine1 - serpin peptidase inhibitor, clade e (nexin, plasminogen activator inhibitor type 1), member 1, Gsk3b - glycogen synthase kinase 3 beta, Pdgfb - platelet-derived growth factor beta polypeptide, Cdc6 - cell division cycle 6]
GO:0072132	mesenchyme morphogenesis	0.000853	0.0365	6.5	17529	24	562	5	[Eng - endoglin, Tbx2 - t-box 2, Hey1 - hairy/enhancer-of-split related with yrpw motif 1, Tgfb2 - transforming growth factor, beta 2, Smad4 - smad family member 4]
GO:0044093	positive regulation of molecular function	0.000854	0.0365	1.44	17529	1602	562	74	[Elmo1 - engulfment and cell motility 1, Nf1 - neurofibromin 1, Ngfr - nerve growth factor receptor, Plk1 - polo-like kinase 1, Arrb1 - arrestin, beta 1, Chtf18 - ctf18, chromosome transmission fidelity factor 18 homolog (s. cerevisiae), Tgfb2 - transforming growth factor, beta 2, Ercc2 - excision repair cross-complementing rodent repair deficiency, complementation group 2, Mtpn - myotrophin, Map…
GO:0006139	nucleobase-containing compound metabolic process	0.000869	0.037	1.32	17529	2691	562	114	[Rc3h1 - ring finger and ccch-type domains 1, Mybl2 - myeloblastosis oncogene-like 2, Jdp2 - jun dimerization protein 2, Chtf18 - ctf18, chromosome transmission fidelity factor 18 homolog (s. cerevisiae), Arrb1 - arrestin, beta 1, Ercc2 - excision repair cross-complementing rodent repair deficiency, complementation group 2, Nr2f2 - nuclear receptor subfamily 2, group f, member 2, Eya3 - eyes abse…
GO:0002793	positive regulation of peptide secretion	0.000879	0.0373	2.2	17529	284	562	20	[Ptpn22 - protein tyrosine phosphatase, non-receptor type 22 (lymphoid), Wnt5a - wingless-type mmtv integration site family, member 5a, Ezr - ezrin, Arrb1 - arrestin, beta 1, Tgfb2 - transforming growth factor, beta 2, Ddx58 - dead (asp-glu-ala-asp) box polypeptide 58, Sec24a - sec24 family, member a (s. cerevisiae), Ncl - nucleolin, Lif - leukemia inhibitory factor, Mmp13 - matrix metallopeptida…
GO:0032956	regulation of actin cytoskeleton organization	0.000879	0.0372	2.2	17529	284	562	20	[Rdx - radixin, Ppfia1 - protein tyrosine phosphatase, receptor type, f polypeptide (ptprf), interacting protein (liprin), alpha 1, Plekhg2 - pleckstrin homology domain containing, family g (with rhogef domain) member 2, Synpo - synaptopodin, Cd2ap - cd2-associated protein, Tgfb2 - transforming growth factor, beta 2, Fscn1 - fascin homolog 1, actin bundling protein (strongylocentrotus purpuratus)…
GO:1902275	regulation of chromatin organization	0.000883	0.0373	2.65	17529	165	562	14	[Cdc45 - cell division cycle 45, Atad2 - atpase family, aaa domain containing 2, Jdp2 - jun dimerization protein 2, Arrb1 - arrestin, beta 1, Mki67 - antigen identified by monoclonal antibody ki-67, Supt6h - suppressor of ty 6 homolog (s. cerevisiae), Pml - promyelocytic leukemia, Smad4 - smad family member 4, Snai2 - snail family zinc finger 2, Lif - leukemia inhibitory factor, Setd7 - set domai…
GO:0010001	glial cell differentiation	0.000929	0.0391	3.28	17529	95	562	10	[Nf1 - neurofibromin 1, Cdkn2c - cyclin-dependent kinase inhibitor 2c (p18, inhibits cdk4), Metrn - meteorin, glial cell differentiation regulator, Plp1 - proteolipid protein 1, S100b - s100 calcium binding protein b, Gfap - glial fibrillary acidic protein, Tspan2 - tetraspanin 2, Reln - reelin, Lif - leukemia inhibitory factor, Sox10 - sry (sex determining region y)-box 10]
GO:0002237	response to molecule of bacterial origin	0.000975	0.041	1.98	17529	394	562	25	[Acp5 - acid phosphatase 5, tartrate resistant, Ngfr - nerve growth factor receptor, Ncl - nucleolin, Ednrb - endothelin receptor type b, Ctsg - cathepsin g, Src - v-src avian sarcoma (schmidt-ruppin a-2) viral oncogene homolog, Lbp - lipopolysaccharide binding protein, Arg1 - arginase, liver, Ppard - peroxisome proliferator-activated receptor delta, Ngf - nerve growth factor (beta polypeptide), …

## Sheet: S_vs_E.down_in_E.GOTERMS
SCROLL DOWN FOR TABLE
GO Term	Description	P-value	FDR q-value	Enrichment	N	B	n	b	Genes
GO:0003012	muscle system process	4.96e-33	7.59e-29	7.59	17529	216	588	55	[Mb - myoglobin, Trim63 - tripartite motif containing 63, e3 ubiquitin protein ligase, Myog - myogenin, Tcap - titin-cap, Tmod4 - tropomodulin 4, Stac3 - sh3 and cysteine rich domain 3, Mstn - myostatin, Scn4b - sodium channel, voltage-gated, type iv, beta, Tpm2 - tropomyosin 2, beta, Tnnc2 - troponin c type 2 (fast), Lmod3 - leiomodin 3 (fetal), Mylpf - myosin light chain, phosphorylatable, fast…
GO:0006936	muscle contraction	1.18e-29	8.99e-26	8.31	17529	165	588	46	[Mb - myoglobin, Trim63 - tripartite motif containing 63, e3 ubiquitin protein ligase, Tnnt1 - troponin t type 1 (skeletal, slow), Tcap - titin-cap, Myl2 - myosin, light chain 2, regulatory, cardiac, slow, Tmod4 - tropomodulin 4, Stac3 - sh3 and cysteine rich domain 3, Scn4b - sodium channel, voltage-gated, type iv, beta, Tpm2 - tropomyosin 2, beta, Tnnc2 - troponin c type 2 (fast), Chrnb1 - chol…
GO:0006941	striated muscle contraction	1.46e-27	7.43e-24	11.52	17529	88	588	34	[Mb - myoglobin, Tnnt1 - troponin t type 1 (skeletal, slow), Tcap - titin-cap, Myl2 - myosin, light chain 2, regulatory, cardiac, slow, Stac3 - sh3 and cysteine rich domain 3, Scn4b - sodium channel, voltage-gated, type iv, beta, Tnnc2 - troponin c type 2 (fast), Chrnb1 - cholinergic receptor, nicotinic, beta 1 (muscle), Lmod3 - leiomodin 3 (fetal), Chrna1 - cholinergic receptor, nicotinic, alpha…
GO:0003009	skeletal muscle contraction	7.68e-16	2.94e-12	14.91	17529	32	588	16	[Mb - myoglobin, Chrnd - cholinergic receptor, nicotinic, delta (muscle), Tnnt1 - troponin t type 1 (skeletal, slow), Tcap - titin-cap, Tnnt3 - troponin t type 3 (skeletal, fast), Stac3 - sh3 and cysteine rich domain 3, Synm - synemin, intermediate filament protein, Tnnc2 - troponin c type 2 (fast), Myh7 - myosin, heavy chain 7, cardiac muscle, beta, Chrnb1 - cholinergic receptor, nicotinic, beta…
GO:0055002	striated muscle cell development	1.09e-14	3.34e-11	8.2	17529	80	588	22	[Acta1 - actin, alpha 1, skeletal muscle, Myog - myogenin, Popdc2 - popeye domain containing 2, Tcap - titin-cap, Myl2 - myosin, light chain 2, regulatory, cardiac, slow, Myod1 - myogenic differentiation 1, Actn2 - actinin alpha 2, Klhl41 - kelch-like family member 41, Stac3 - sh3 and cysteine rich domain 3, Nexn - nexilin (f actin binding protein), Myo18b - myosin xviiib, Flnc - filamin c, gamma…
GO:0055001	muscle cell development	2.01e-14	5.11e-11	7.53	17529	91	588	23	[Acta1 - actin, alpha 1, skeletal muscle, Myog - myogenin, Popdc2 - popeye domain containing 2, Myl2 - myosin, light chain 2, regulatory, cardiac, slow, Tcap - titin-cap, Myod1 - myogenic differentiation 1, Trim54 - tripartite motif-containing 54, Actn2 - actinin alpha 2, Klhl41 - kelch-like family member 41, Stac3 - sh3 and cysteine rich domain 3, Nexn - nexilin (f actin binding protein), Myo18b…
GO:0060537	muscle tissue development	6.01e-14	1.31e-10	6.2	17529	125	588	26	[Cfl2 - cofilin 2, muscle, Ndufv2 - nadh dehydrogenase (ubiquinone) flavoprotein 2, Myog - myogenin, Aldh1a2 - aldehyde dehydrogenase 1 family, member a2, Tp63 - tumor protein p63, Pitx1 - paired-like homeodomain 1, Casq1 - calsequestrin 1 (fast-twitch, skeletal muscle), Rxrg - retinoid x receptor gamma, Mylpf - myosin light chain, phosphorylatable, fast skeletal muscle, Myl3 - myosin, light chai…
GO:0031032	actomyosin structure organization	9.51e-14	1.82e-10	7.45	17529	88	588	22	[Myoz2 - myozenin 2, Cfl2 - cofilin 2, muscle, Tcap - titin-cap, Myom2 - myomesin 2, Myl2 - myosin, light chain 2, regulatory, cardiac, slow, Capn3 - calpain 3, Actn2 - actinin alpha 2, Tmod4 - tropomodulin 4, Klhl41 - kelch-like family member 41, LOC298139 - similar to riken cdna 2310003m01, Casq1 - calsequestrin 1 (fast-twitch, skeletal muscle), Mybph - myosin binding protein h, Myoz1 - myozeni…
GO:0014706	striated muscle tissue development	9.6e-14	1.63e-10	6.69	17529	107	588	24	[Cfl2 - cofilin 2, muscle, Ndufv2 - nadh dehydrogenase (ubiquinone) flavoprotein 2, Myog - myogenin, Vamp5 - vesicle-associated membrane protein 5, Myom1 - myomesin 1, Aldh1a2 - aldehyde dehydrogenase 1 family, member a2, Six1 - six homeobox 1, Myom2 - myomesin 2, Myod1 - myogenic differentiation 1, Pitx1 - paired-like homeodomain 1, Srpk3 - srsf protein kinase 3, Ckmt2 - creatine kinase, mitocho…
GO:0007519	skeletal muscle tissue development	1.08e-13	1.65e-10	8.4	17529	71	588	20	[Cfl2 - cofilin 2, muscle, Myog - myogenin, Myom1 - myomesin 1, Vamp5 - vesicle-associated membrane protein 5, Six1 - six homeobox 1, Myom2 - myomesin 2, Myod1 - myogenic differentiation 1, Pitx1 - paired-like homeodomain 1, Srpk3 - srsf protein kinase 3, Ckmt2 - creatine kinase, mitochondrial 2, sarcomeric, Casq1 - calsequestrin 1 (fast-twitch, skeletal muscle), Mef2c - myocyte enhancer factor 2…
GO:0006091	generation of precursor metabolites and energy	3.09e-13	4.29e-10	4.68	17529	204	588	32	[Adsl - adenylosuccinate lyase, Coq10a - coenzyme q10 homolog a (s. cerevisiae), Ndufv2 - nadh dehydrogenase (ubiquinone) flavoprotein 2, Sdhd - succinate dehydrogenase complex, subunit d, integral membrane protein, Ndufs3 - nadh dehydrogenase (ubiquinone) fe-s protein 3, Acadm - acyl-coa dehydrogenase, c-4 to c-12 straight chain, Ndufs4 - nadh dehydrogenase (ubiquinone) fe-s protein 4, Cox7c - c…
GO:0048747	muscle fiber development	5.07e-12	6.46e-09	9.35	17529	51	588	16	[Acta1 - actin, alpha 1, skeletal muscle, Myog - myogenin, Tcap - titin-cap, Myl2 - myosin, light chain 2, regulatory, cardiac, slow, Myod1 - myogenic differentiation 1, Klhl41 - kelch-like family member 41, Stac3 - sh3 and cysteine rich domain 3, Nexn - nexilin (f actin binding protein), Myo18b - myosin xviiib, Flnc - filamin c, gamma, Chrnb1 - cholinergic receptor, nicotinic, beta 1 (muscle), L…
GO:0045214	sarcomere organization	2.9e-11	3.41e-08	11.4	17529	34	588	13	[Cfl2 - cofilin 2, muscle, Tcap - titin-cap, Myom2 - myomesin 2, Capn3 - calpain 3, Actn2 - actinin alpha 2, Klhl41 - kelch-like family member 41, Casq1 - calsequestrin 1 (fast-twitch, skeletal muscle), Mybph - myosin binding protein h, Casq2 - calsequestrin 2 (cardiac muscle), Mybpc1 - myosin binding protein c, slow type, Mypn - myopalladin, Ldb3 - lim domain binding 3, Mybpc2 - myosin binding p…
GO:0055114	oxidation-reduction process	3.88e-11	4.23e-08	2.43	17529	784	588	64	[Adsl - adenylosuccinate lyase, Sdhd - succinate dehydrogenase complex, subunit d, integral membrane protein, Ndufs3 - nadh dehydrogenase (ubiquinone) fe-s protein 3, Acadm - acyl-coa dehydrogenase, c-4 to c-12 straight chain, Aldh1a2 - aldehyde dehydrogenase 1 family, member a2, Ndufs4 - nadh dehydrogenase (ubiquinone) fe-s protein 4, Grhpr - glyoxylate reductase/hydroxypyruvate reductase, Ndufa…
GO:0030239	myofibril assembly	2.7e-10	2.75e-07	12.61	17529	26	588	11	[Myoz2 - myozenin 2, Myoz1 - myozenin 1, Lmod3 - leiomodin 3 (fetal), Tcap - titin-cap, Myl2 - myosin, light chain 2, regulatory, cardiac, slow, Capn3 - calpain 3, Prox1 - prospero homeobox 1, Tmod4 - tropomodulin 4, Klhl41 - kelch-like family member 41, Tmod1 - tropomodulin 1, Csrp3 - cysteine and glycine-rich protein 3 (cardiac lim protein)]
GO:0010830	regulation of myotube differentiation	5.03e-10	4.8e-07	7.71	17529	58	588	15	[Myog - myogenin, Rbm24 - rna binding motif protein 24, Smyd1 - set and mynd domain containing 1, Myod1 - myogenic differentiation 1, Actn3 - actinin alpha 3, Dmpk - dystrophia myotonica-protein kinase, Cxcl12 - chemokine (c-x-c motif) ligand 12, Ankrd2 - ankyrin repeat domain 2 (stretch responsive muscle), Trim72 - tripartite motif-containing 72, Cav3 - caveolin 3, Lmod3 - leiomodin 3 (fetal), C…
GO:0015980	energy derivation by oxidation of organic compounds	7.65e-10	6.88e-07	5.66	17529	100	588	19	[Adsl - adenylosuccinate lyase, Coq10a - coenzyme q10 homolog a (s. cerevisiae), Acadm - acyl-coa dehydrogenase, c-4 to c-12 straight chain, Ndufs3 - nadh dehydrogenase (ubiquinone) fe-s protein 3, Pgm1 - phosphoglucomutase 1, Ppp1r3c - protein phosphatase 1, regulatory subunit 3c, Gyg1 - glycogenin 1, Ndufs4 - nadh dehydrogenase (ubiquinone) fe-s protein 4, Agl - amylo-alpha-1, 6-glucosidase, 4-…
GO:0061061	muscle structure development	7.72e-10	6.56e-07	6.91	17529	69	588	16	[Hspb2 - heat shock protein beta 2, Myog - myogenin, Vamp5 - vesicle-associated membrane protein 5, Myom1 - myomesin 1, Myom2 - myomesin 2, Myod1 - myogenic differentiation 1, Cryab - crystallin, alpha b, Capn3 - calpain 3, Pitx1 - paired-like homeodomain 1, Ky - kyphoscoliosis peptidase, Jph1 - junctophilin 1, Trim72 - tripartite motif-containing 72, Cacna1s - calcium channel, voltage-dependent,…
GO:0090257	regulation of muscle system process	2.46e-09	1.98e-06	3.81	17529	211	588	27	[Trim63 - tripartite motif containing 63, e3 ubiquitin protein ligase, Myog - myogenin, Tnnt1 - troponin t type 1 (skeletal, slow), Hrc - histidine rich calcium binding protein, Fxyd1 - fxyd domain-containing ion transport regulator 1, Hspb6 - heat shock protein, alpha-crystallin-related, b6, Dmpk - dystrophia myotonica-protein kinase, Mstn - myostatin, Casq1 - calsequestrin 1 (fast-twitch, skele…
GO:0006073	cellular glucan metabolic process	2.94e-09	2.25e-06	8.25	17529	47	588	13	[Acadm - acyl-coa dehydrogenase, c-4 to c-12 straight chain, Ppp1r3c - protein phosphatase 1, regulatory subunit 3c, Pgm1 - phosphoglucomutase 1, Gyg1 - glycogenin 1, Stbd1 - starch binding domain 1, Agl - amylo-alpha-1, 6-glucosidase, 4-alpha-glucanotransferase, Pygm - phosphorylase, glycogen, muscle, Ppp1r1a - protein phosphatase 1, regulatory (inhibitor) subunit 1a, Pfkm - phosphofructokinase,…
GO:0005977	glycogen metabolic process	2.94e-09	2.14e-06	8.25	17529	47	588	13	[Acadm - acyl-coa dehydrogenase, c-4 to c-12 straight chain, Pgm1 - phosphoglucomutase 1, Ppp1r3c - protein phosphatase 1, regulatory subunit 3c, Gyg1 - glycogenin 1, Agl - amylo-alpha-1, 6-glucosidase, 4-alpha-glucanotransferase, Stbd1 - starch binding domain 1, Pygm - phosphorylase, glycogen, muscle, Ppp1r1a - protein phosphatase 1, regulatory (inhibitor) subunit 1a, Pfkm - phosphofructokinase,…
GO:0044042	glucan metabolic process	2.94e-09	2.05e-06	8.25	17529	47	588	13	[Acadm - acyl-coa dehydrogenase, c-4 to c-12 straight chain, Pgm1 - phosphoglucomutase 1, Ppp1r3c - protein phosphatase 1, regulatory subunit 3c, Gyg1 - glycogenin 1, Agl - amylo-alpha-1, 6-glucosidase, 4-alpha-glucanotransferase, Stbd1 - starch binding domain 1, Pygm - phosphorylase, glycogen, muscle, Ppp1r1a - protein phosphatase 1, regulatory (inhibitor) subunit 1a, Pfkm - phosphofructokinase,…
GO:0035914	skeletal muscle cell differentiation	3.1e-09	2.06e-06	7.45	17529	56	588	14	[Klf5 - kruppel-like factor 5, Mylk2 - myosin light chain kinase 2, Myog - myogenin, Smyd1 - set and mynd domain containing 1, Myod1 - myogenic differentiation 1, Atf3 - activating transcription factor 3, Klhl41 - kelch-like family member 41, Ankrd1 - ankyrin repeat domain 1, Asb2 - ankyrin repeat and socs box-containing 2, Ankrd2 - ankyrin repeat domain 2 (stretch responsive muscle), Mef2c - myo…
GO:0045661	regulation of myoblast differentiation	3.99e-09	2.54e-06	7.32	17529	57	588	14	[Myog - myogenin, Capn3 - calpain 3, Smyd1 - set and mynd domain containing 1, Myod1 - myogenic differentiation 1, Klhl41 - kelch-like family member 41, Cxcl14 - chemokine (c-x-c motif) ligand 14, Mstn - myostatin, Nmrk2 - nicotinamide riboside kinase 2, Ankrd2 - ankyrin repeat domain 2 (stretch responsive muscle), Mef2c - myocyte enhancer factor 2c, Csrp3 - cysteine and glycine-rich protein 3 (c…
GO:0051153	regulation of striated muscle cell differentiation	5.57e-09	3.41e-06	5.06	17529	112	588	19	[Ankrd23 - ankyrin repeat domain 23, Myog - myogenin, Actn3 - actinin alpha 3, Myod1 - myogenic differentiation 1, Rbm24 - rna binding motif protein 24, Smyd1 - set and mynd domain containing 1, Dmpk - dystrophia myotonica-protein kinase, Cxcl12 - chemokine (c-x-c motif) ligand 12, Ankrd2 - ankyrin repeat domain 2 (stretch responsive muscle), Trim72 - tripartite motif-containing 72, Mef2c - myocy…
GO:0010927	cellular component assembly involved in morphogenesis	6.81e-09	4e-06	6.48	17529	69	588	15	[Myoz2 - myozenin 2, Tcap - titin-cap, Myom2 - myomesin 2, Myl2 - myosin, light chain 2, regulatory, cardiac, slow, Capn3 - calpain 3, Tmod4 - tropomodulin 4, Klhl41 - kelch-like family member 41, Myoz1 - myozenin 1, Mybph - myosin binding protein h, Lmod3 - leiomodin 3 (fetal), Prox1 - prospero homeobox 1, Tmod1 - tropomodulin 1, Csrp3 - cysteine and glycine-rich protein 3 (cardiac lim protein),…
GO:0010831	positive regulation of myotube differentiation	7.82e-09	4.43e-06	9.64	17529	34	588	11	[Myog - myogenin, Lmod3 - leiomodin 3 (fetal), Cav3 - caveolin 3, Actn3 - actinin alpha 3, Myod1 - myogenic differentiation 1, Smyd1 - set and mynd domain containing 1, Cxcl12 - chemokine (c-x-c motif) ligand 12, Csrp3 - cysteine and glycine-rich protein 3 (cardiac lim protein), Cxcl9 - chemokine (c-x-c motif) ligand 9, Neu2 - sialidase 2, Myf6 - myogenic factor 6]
GO:0044262	cellular carbohydrate metabolic process	9.62e-09	5.25e-06	4.66	17529	128	588	20	[Coq2 - coenzyme q2 4-hydroxybenzoate polyprenyltransferase, Acadm - acyl-coa dehydrogenase, c-4 to c-12 straight chain, Pgm1 - phosphoglucomutase 1, Ppp1r3c - protein phosphatase 1, regulatory subunit 3c, Gyg1 - glycogenin 1, Agl - amylo-alpha-1, 6-glucosidase, 4-alpha-glucanotransferase, Stbd1 - starch binding domain 1, Pygm - phosphorylase, glycogen, muscle, Pfkm - phosphofructokinase, muscle,…
GO:0034762	regulation of transmembrane transport	1.22e-08	6.43e-06	2.7	17529	441	588	40	[Rrad - ras-related associated with diabetes, Hrc - histidine rich calcium binding protein, Fxyd1 - fxyd domain-containing ion transport regulator 1, Cacng1 - calcium channel, voltage-dependent, gamma subunit 1, Capn3 - calpain 3, Clcn4 - chloride channel, voltage-sensitive 4, Casq1 - calsequestrin 1 (fast-twitch, skeletal muscle), Wnk2 - wnk lysine deficient protein kinase 2, Scn4b - sodium chan…
GO:0014819	regulation of skeletal muscle contraction	1.35e-08	6.9e-06	18.97	17529	11	588	7	[Casq1 - calsequestrin 1 (fast-twitch, skeletal muscle), Mylk2 - myosin light chain kinase 2, Myh7 - myosin, heavy chain 7, cardiac muscle, beta, Cav3 - caveolin 3, Actn3 - actinin alpha 3, Dmpk - dystrophia myotonica-protein kinase, Atp2a1 - atpase, ca++ transporting, cardiac muscle, fast twitch 1]
GO:0034765	regulation of ion transmembrane transport	1.54e-08	7.61e-06	2.72	17529	427	588	39	[Rrad - ras-related associated with diabetes, Hrc - histidine rich calcium binding protein, Fxyd1 - fxyd domain-containing ion transport regulator 1, Cacng1 - calcium channel, voltage-dependent, gamma subunit 1, Capn3 - calpain 3, Clcn4 - chloride channel, voltage-sensitive 4, Casq1 - calsequestrin 1 (fast-twitch, skeletal muscle), Wnk2 - wnk lysine deficient protein kinase 2, Scn4b - sodium chan…
GO:0051147	regulation of muscle cell differentiation	1.65e-08	7.87e-06	4.32	17529	145	588	21	[Klf5 - kruppel-like factor 5, Smarcd3 - swi/snf related, matrix associated, actin dependent regulator of chromatin, subfamily d, member 3, Ankrd23 - ankyrin repeat domain 23, Myog - myogenin, Myod1 - myogenic differentiation 1, Actn3 - actinin alpha 3, Rbm24 - rna binding motif protein 24, Smyd1 - set and mynd domain containing 1, Dmpk - dystrophia myotonica-protein kinase, Cxcl12 - chemokine (c…
GO:0030029	actin filament-based process	2.93e-08	1.36e-05	3.08	17529	300	588	31	[Myoz2 - myozenin 2, Cfl2 - cofilin 2, muscle, Myl2 - myosin, light chain 2, regulatory, cardiac, slow, Tcap - titin-cap, Capn3 - calpain 3, Tmod4 - tropomodulin 4, S100a9 - s100 calcium binding protein a9, Klhl41 - kelch-like family member 41, Casq1 - calsequestrin 1 (fast-twitch, skeletal muscle), Myoz1 - myozenin 1, Cap2 - cap, adenylate cyclase-associated protein, 2 (yeast), Coro6 - coronin 6…
GO:0014888	striated muscle adaptation	3.92e-08	1.76e-05	9.62	17529	31	588	10	[Trim63 - tripartite motif containing 63, e3 ubiquitin protein ligase, Mef2c - myocyte enhancer factor 2c, Myog - myogenin, Myh7 - myosin, heavy chain 7, cardiac muscle, beta, Cacna1s - calcium channel, voltage-dependent, l type, alpha 1s subunit, Tcap - titin-cap, Actn3 - actinin alpha 3, Myod1 - myogenic differentiation 1, Klf15 - kruppel-like factor 15, Mstn - myostatin]
GO:0006942	regulation of striated muscle contraction	3.97e-08	1.73e-05	5.73	17529	78	588	15	[Mylk2 - myosin light chain kinase 2, Hrc - histidine rich calcium binding protein, Fxyd1 - fxyd domain-containing ion transport regulator 1, Actn3 - actinin alpha 3, Dmpk - dystrophia myotonica-protein kinase, Tnnt3 - troponin t type 3 (skeletal, fast), Atp1a2 - atpase, na+/k+ transporting, alpha 2 polypeptide, Casq1 - calsequestrin 1 (fast-twitch, skeletal muscle), Myh7 - myosin, heavy chain 7,…
GO:0060048	cardiac muscle contraction	4.19e-08	1.78e-05	7.45	17529	48	588	12	[Scn4b - sodium channel, voltage-gated, type iv, beta, Scn1b - sodium channel, voltage-gated, type i, beta, Myh7 - myosin, heavy chain 7, cardiac muscle, beta, Myl2 - myosin, light chain 2, regulatory, cardiac, slow, Tcap - titin-cap, Tnni2 - troponin i type 2 (skeletal, fast), Casq2 - calsequestrin 2 (cardiac muscle), Tnni1 - troponin i type 1 (skeletal, slow), Atp1a2 - atpase, na+/k+ transporti…
GO:0051155	positive regulation of striated muscle cell differentiation	4.54e-08	1.88e-05	6.14	17529	68	588	14	[Myog - myogenin, Smyd1 - set and mynd domain containing 1, Actn3 - actinin alpha 3, Myod1 - myogenic differentiation 1, Cxcl12 - chemokine (c-x-c motif) ligand 12, Mef2c - myocyte enhancer factor 2c, Cav3 - caveolin 3, Lmod3 - leiomodin 3 (fetal), Prox1 - prospero homeobox 1, Slc25a4 - solute carrier family 25 (mitochondrial carrier; adenine nucleotide translocator), member 4, Csrp3 - cysteine a…
GO:0006112	energy reserve metabolic process	4.71e-08	1.89e-05	6.68	17529	58	588	13	[Acadm - acyl-coa dehydrogenase, c-4 to c-12 straight chain, Pgm1 - phosphoglucomutase 1, Ppp1r3c - protein phosphatase 1, regulatory subunit 3c, Gyg1 - glycogenin 1, Stbd1 - starch binding domain 1, Agl - amylo-alpha-1, 6-glucosidase, 4-alpha-glucanotransferase, Pygm - phosphorylase, glycogen, muscle, Ppp1r1a - protein phosphatase 1, regulatory (inhibitor) subunit 1a, Pfkm - phosphofructokinase,…
GO:0051149	positive regulation of muscle cell differentiation	4.75e-08	1.86e-05	5.66	17529	79	588	15	[Smarcd3 - swi/snf related, matrix associated, actin dependent regulator of chromatin, subfamily d, member 3, Myog - myogenin, Smyd1 - set and mynd domain containing 1, Myod1 - myogenic differentiation 1, Actn3 - actinin alpha 3, Cxcl12 - chemokine (c-x-c motif) ligand 12, Mef2c - myocyte enhancer factor 2c, Lmod3 - leiomodin 3 (fetal), Cav3 - caveolin 3, Prox1 - prospero homeobox 1, Slc25a4 - so…
GO:0044264	cellular polysaccharide metabolic process	8.93e-08	3.41e-05	6.35	17529	61	588	13	[Acadm - acyl-coa dehydrogenase, c-4 to c-12 straight chain, Ppp1r3c - protein phosphatase 1, regulatory subunit 3c, Pgm1 - phosphoglucomutase 1, Gyg1 - glycogenin 1, Stbd1 - starch binding domain 1, Agl - amylo-alpha-1, 6-glucosidase, 4-alpha-glucanotransferase, Pygm - phosphorylase, glycogen, muscle, Ppp1r1a - protein phosphatase 1, regulatory (inhibitor) subunit 1a, Pfkm - phosphofructokinase,…
GO:0006937	regulation of muscle contraction	9.33e-08	3.48e-05	4.08	17529	146	588	20	[Mylk2 - myosin light chain kinase 2, Hrc - histidine rich calcium binding protein, Tnnt1 - troponin t type 1 (skeletal, slow), Fxyd1 - fxyd domain-containing ion transport regulator 1, Actn3 - actinin alpha 3, Hspb6 - heat shock protein, alpha-crystallin-related, b6, Tnnt3 - troponin t type 3 (skeletal, fast), Dmpk - dystrophia myotonica-protein kinase, Atp1a2 - atpase, na+/k+ transporting, alph…
GO:0048741	skeletal muscle fiber development	9.49e-08	3.45e-05	10.32	17529	26	588	9	[Acta1 - actin, alpha 1, skeletal muscle, Myog - myogenin, Cacna1s - calcium channel, voltage-dependent, l type, alpha 1s subunit, Lmod3 - leiomodin 3 (fetal), Myod1 - myogenic differentiation 1, Klhl40 - kelch-like family member 40, Klhl41 - kelch-like family member 41, Ryr1 - ryanodine receptor 1 (skeletal), Stac3 - sh3 and cysteine rich domain 3]
GO:0043269	regulation of ion transport	1.55e-07	5.5e-05	2.22	17529	658	588	49	[Hrc - histidine rich calcium binding protein, Cacng1 - calcium channel, voltage-dependent, gamma subunit 1, Fxyd1 - fxyd domain-containing ion transport regulator 1, Capn3 - calpain 3, Dmpk - dystrophia myotonica-protein kinase, Clcn4 - chloride channel, voltage-sensitive 4, Wnk2 - wnk lysine deficient protein kinase 2, Scn4b - sodium channel, voltage-gated, type iv, beta, Cav3 - caveolin 3, Clc…
GO:0030036	actin cytoskeleton organization	1.61e-07	5.58e-05	3.06	17529	273	588	28	[Myoz2 - myozenin 2, Cfl2 - cofilin 2, muscle, Myl2 - myosin, light chain 2, regulatory, cardiac, slow, Tcap - titin-cap, Capn3 - calpain 3, Tmod4 - tropomodulin 4, S100a9 - s100 calcium binding protein a9, Klhl41 - kelch-like family member 41, Casq1 - calsequestrin 1 (fast-twitch, skeletal muscle), Myoz1 - myozenin 1, Cap2 - cap, adenylate cyclase-associated protein, 2 (yeast), Coro6 - coronin 6…
GO:0044281	small molecule metabolic process	1.65e-07	5.6e-05	1.78	17529	1390	588	83	[Adsl - adenylosuccinate lyase, Ankrd23 - ankyrin repeat domain 23, Sdhd - succinate dehydrogenase complex, subunit d, integral membrane protein, Acadm - acyl-coa dehydrogenase, c-4 to c-12 straight chain, Aldh1a2 - aldehyde dehydrogenase 1 family, member a2, Ghr - growth hormone receptor, Serpina12 - serpin peptidase inhibitor, clade a (alpha-1 antiproteinase, antitrypsin), member 12, Atp5l - at…
GO:0055013	cardiac muscle cell development	1.93e-07	6.42e-05	8.28	17529	36	588	10	[Myo18b - myosin xviiib, Popdc2 - popeye domain containing 2, Cav3 - caveolin 3, Bves - blood vessel epicardial substance, Tcap - titin-cap, Pitx2 - paired-like homeodomain 2, Actn2 - actinin alpha 2, Alpk3 - alpha-kinase 3, Mypn - myopalladin, Nexn - nexilin (f actin binding protein)]
GO:0005976	polysaccharide metabolic process	1.97e-07	6.42e-05	5.96	17529	65	588	13	[Acadm - acyl-coa dehydrogenase, c-4 to c-12 straight chain, Pgm1 - phosphoglucomutase 1, Ppp1r3c - protein phosphatase 1, regulatory subunit 3c, Gyg1 - glycogenin 1, Stbd1 - starch binding domain 1, Agl - amylo-alpha-1, 6-glucosidase, 4-alpha-glucanotransferase, Pygm - phosphorylase, glycogen, muscle, Ppp1r1a - protein phosphatase 1, regulatory (inhibitor) subunit 1a, Pfkm - phosphofructokinase,…
GO:0007517	muscle organ development	1.97e-07	6.29e-05	5.96	17529	65	588	13	[Myog - myogenin, Vamp5 - vesicle-associated membrane protein 5, Myom1 - myomesin 1, Myom2 - myomesin 2, Myod1 - myogenic differentiation 1, Cryab - crystallin, alpha b, Pitx1 - paired-like homeodomain 1, Ky - kyphoscoliosis peptidase, Jph1 - junctophilin 1, Trim72 - tripartite motif-containing 72, Cacna1s - calcium channel, voltage-dependent, l type, alpha 1s subunit, Pitx2 - paired-like homeodo…
GO:0031034	myosin filament assembly	2.6e-07	8.11e-05	17.89	17529	10	588	6	[Mybph - myosin binding protein h, Myh2 - myosin, heavy chain 2, skeletal muscle, adult, Myom2 - myomesin 2, Tcap - titin-cap, Mybpc1 - myosin binding protein c, slow type, Mybpc2 - myosin binding protein c, fast-type]
GO:0031033	myosin filament organization	2.6e-07	7.95e-05	17.89	17529	10	588	6	[Mybph - myosin binding protein h, Myh2 - myosin, heavy chain 2, skeletal muscle, adult, Tcap - titin-cap, Myom2 - myomesin 2, Mybpc1 - myosin binding protein c, slow type, Mybpc2 - myosin binding protein c, fast-type]
GO:0014904	myotube cell development	2.78e-07	8.33e-05	9.25	17529	29	588	9	[Acta1 - actin, alpha 1, skeletal muscle, Myog - myogenin, Cacna1s - calcium channel, voltage-dependent, l type, alpha 1s subunit, Lmod3 - leiomodin 3 (fetal), Myod1 - myogenic differentiation 1, Klhl40 - kelch-like family member 40, Klhl41 - kelch-like family member 41, Ryr1 - ryanodine receptor 1 (skeletal), Stac3 - sh3 and cysteine rich domain 3]
GO:0043500	muscle adaptation	3.38e-07	9.95e-05	7.85	17529	38	588	10	[Trim63 - tripartite motif containing 63, e3 ubiquitin protein ligase, Mef2c - myocyte enhancer factor 2c, Myog - myogenin, Myh7 - myosin, heavy chain 7, cardiac muscle, beta, Cacna1s - calcium channel, voltage-dependent, l type, alpha 1s subunit, Tcap - titin-cap, Actn3 - actinin alpha 3, Myod1 - myogenic differentiation 1, Klf15 - kruppel-like factor 15, Mstn - myostatin]
GO:0055006	cardiac cell development	4.41e-07	0.000127	7.64	17529	39	588	10	[Myo18b - myosin xviiib, Popdc2 - popeye domain containing 2, Cav3 - caveolin 3, Bves - blood vessel epicardial substance, Tcap - titin-cap, Pitx2 - paired-like homeodomain 2, Actn2 - actinin alpha 2, Alpk3 - alpha-kinase 3, Mypn - myopalladin, Nexn - nexilin (f actin binding protein)]
GO:0006812	cation transport	4.48e-07	0.000127	2.07	17529	764	588	53	[Fgf13 - fibroblast growth factor 13, Slc25a29 - solute carrier family 25 (mitochondrial carnitine/acylcarnitine carrier), member 29, Cacng1 - calcium channel, voltage-dependent, gamma subunit 1, Fxyd1 - fxyd domain-containing ion transport regulator 1, Atp5l - atp synthase, h+ transporting, mitochondrial fo complex, subunit g, Atp5i - atp synthase, h+ transporting, mitochondrial fo complex, subu…
GO:0006811	ion transport	5.01e-07	0.000139	1.84	17529	1133	588	70	[Fgf13 - fibroblast growth factor 13, Slc25a29 - solute carrier family 25 (mitochondrial carnitine/acylcarnitine carrier), member 29, Fxyd1 - fxyd domain-containing ion transport regulator 1, Cacng1 - calcium channel, voltage-dependent, gamma subunit 1, Atp5l - atp synthase, h+ transporting, mitochondrial fo complex, subunit g, Atp5i - atp synthase, h+ transporting, mitochondrial fo complex, subu…
GO:0070296	sarcoplasmic reticulum calcium ion transport	5.56e-07	0.000152	16.26	17529	11	588	6	[Trdn - triadin, Cacng1 - calcium channel, voltage-dependent, gamma subunit 1, Atp2a1 - atpase, ca++ transporting, cardiac muscle, fast twitch 1, Ryr1 - ryanodine receptor 1 (skeletal), Nol3 - nucleolar protein 3 (apoptosis repressor with card domain), Sln - sarcolipin]
GO:0005978	glycogen biosynthetic process	6.69e-07	0.000179	12.28	17529	17	588	7	[Pgm1 - phosphoglucomutase 1, Acadm - acyl-coa dehydrogenase, c-4 to c-12 straight chain, Ppp1r3c - protein phosphatase 1, regulatory subunit 3c, Gyg1 - glycogenin 1, Agl - amylo-alpha-1, 6-glucosidase, 4-alpha-glucanotransferase, Phkg1 - phosphorylase kinase, gamma 1, Prkag3 - protein kinase, amp-activated, gamma 3 non-catalytic subunit]
GO:0009250	glucan biosynthetic process	6.69e-07	0.000176	12.28	17529	17	588	7	[Pgm1 - phosphoglucomutase 1, Acadm - acyl-coa dehydrogenase, c-4 to c-12 straight chain, Ppp1r3c - protein phosphatase 1, regulatory subunit 3c, Gyg1 - glycogenin 1, Agl - amylo-alpha-1, 6-glucosidase, 4-alpha-glucanotransferase, Phkg1 - phosphorylase kinase, gamma 1, Prkag3 - protein kinase, amp-activated, gamma 3 non-catalytic subunit]
GO:1904062	regulation of cation transmembrane transport	6.87e-07	0.000178	2.85	17529	293	588	28	[Rrad - ras-related associated with diabetes, Hrc - histidine rich calcium binding protein, Fxyd1 - fxyd domain-containing ion transport regulator 1, Capn3 - calpain 3, Casq1 - calsequestrin 1 (fast-twitch, skeletal muscle), Wnk2 - wnk lysine deficient protein kinase 2, Scn4b - sodium channel, voltage-gated, type iv, beta, Cav3 - caveolin 3, Cacnb1 - calcium channel, voltage-dependent, beta 1 sub…
GO:0032787	monocarboxylic acid metabolic process	8.86e-07	0.000226	2.51	17529	404	588	34	[Ankrd23 - ankyrin repeat domain 23, Acadm - acyl-coa dehydrogenase, c-4 to c-12 straight chain, Aldh1a2 - aldehyde dehydrogenase 1 family, member a2, Ghr - growth hormone receptor, Ndufab1 - nadh dehydrogenase (ubiquinone) 1, alpha/beta subcomplex, 1, Fabp3 - fatty acid binding protein 3, muscle and heart, Cpt1b - carnitine palmitoyltransferase 1b, muscle, Scd - stearoyl-coa desaturase (delta-9-…
GO:0045663	positive regulation of myoblast differentiation	9.98e-07	0.00025	9.54	17529	25	588	8	[Mef2c - myocyte enhancer factor 2c, Myog - myogenin, Myod1 - myogenic differentiation 1, Smyd1 - set and mynd domain containing 1, Csrp3 - cysteine and glycine-rich protein 3 (cardiac lim protein), Cxcl9 - chemokine (c-x-c motif) ligand 9, Neu2 - sialidase 2, Myf6 - myogenic factor 6]
GO:0005975	carbohydrate metabolic process	1.16e-06	0.000286	2.56	17529	372	588	32	[St3gal6 - st3 beta-galactoside alpha-2,3-sialyltransferase 6, Acadm - acyl-coa dehydrogenase, c-4 to c-12 straight chain, Serpina12 - serpin peptidase inhibitor, clade a (alpha-1 antiproteinase, antitrypsin), member 12, Ndufab1 - nadh dehydrogenase (ubiquinone) 1, alpha/beta subcomplex, 1, Pygm - phosphorylase, glycogen, muscle, Ppp1r1a - protein phosphatase 1, regulatory (inhibitor) subunit 1a,…
GO:0014724	regulation of twitch skeletal muscle contraction	1.25e-06	0.000304	29.81	17529	4	588	4	[Mylk2 - myosin light chain kinase 2, Myh7 - myosin, heavy chain 7, cardiac muscle, beta, Actn3 - actinin alpha 3, Atp2a1 - atpase, ca++ transporting, cardiac muscle, fast twitch 1]
GO:0044057	regulation of system process	1.52e-06	0.000363	2.31	17529	490	588	38	[Trim63 - tripartite motif containing 63, e3 ubiquitin protein ligase, Smtnl1 - smoothelin-like 1, Myog - myogenin, Popdc2 - popeye domain containing 2, Tnnt1 - troponin t type 1 (skeletal, slow), Hrc - histidine rich calcium binding protein, Fxyd1 - fxyd domain-containing ion transport regulator 1, Myl2 - myosin, light chain 2, regulatory, cardiac, slow, Dmpk - dystrophia myotonica-protein kinas…
GO:0014874	response to stimulus involved in regulation of muscle adaptation	1.64e-06	0.000385	10.98	17529	19	588	7	[Casq1 - calsequestrin 1 (fast-twitch, skeletal muscle), Srl - sarcalumenin, Trim63 - tripartite motif containing 63, e3 ubiquitin protein ligase, Myog - myogenin, Sgca - sarcoglycan, alpha (dystrophin-associated glycoprotein), Actn3 - actinin alpha 3, Nol3 - nucleolar protein 3 (apoptosis repressor with card domain)]
GO:0042391	regulation of membrane potential	1.91e-06	0.000442	2.42	17529	418	588	34	[Fgf13 - fibroblast growth factor 13, Popdc2 - popeye domain containing 2, Mapt - microtubule-associated protein tau, Fxyd1 - fxyd domain-containing ion transport regulator 1, Dmpk - dystrophia myotonica-protein kinase, P2rx6 - purinergic receptor p2x, ligand-gated ion channel, 6, Scn4b - sodium channel, voltage-gated, type iv, beta, Chrnb1 - cholinergic receptor, nicotinic, beta 1 (muscle), Cav3…
GO:0043501	skeletal muscle adaptation	1.95e-06	0.000445	13.76	17529	13	588	6	[Trim63 - tripartite motif containing 63, e3 ubiquitin protein ligase, Myog - myogenin, Cacna1s - calcium channel, voltage-dependent, l type, alpha 1s subunit, Actn3 - actinin alpha 3, Myod1 - myogenic differentiation 1, Mstn - myostatin]
GO:0034220	ion transmembrane transport	2.05e-06	0.000462	2	17529	761	588	51	[Slc25a29 - solute carrier family 25 (mitochondrial carnitine/acylcarnitine carrier), member 29, Cacng1 - calcium channel, voltage-dependent, gamma subunit 1, Fxyd1 - fxyd domain-containing ion transport regulator 1, Atp5l - atp synthase, h+ transporting, mitochondrial fo complex, subunit g, Atp5i - atp synthase, h+ transporting, mitochondrial fo complex, subunit e, Ndufa4 - nadh dehydrogenase (u…
GO:0048641	regulation of skeletal muscle tissue development	2.08e-06	0.000461	5.86	17529	56	588	11	[Mef2c - myocyte enhancer factor 2c, Myog - myogenin, Six1 - six homeobox 1, Lmod3 - leiomodin 3 (fetal), Actn3 - actinin alpha 3, Myod1 - myogenic differentiation 1, Rbfox1 - rna binding protein, fox-1 homolog (c. elegans) 1, Capn3 - calpain 3, Klhl41 - kelch-like family member 41, Myf6 - myogenic factor 6, Mstn - myostatin]
GO:0071688	striated muscle myosin thick filament assembly	2.15e-06	0.00047	18.63	17529	8	588	5	[Mybph - myosin binding protein h, Tcap - titin-cap, Myom2 - myomesin 2, Mybpc1 - myosin binding protein c, slow type, Mybpc2 - myosin binding protein c, fast-type]
GO:0048743	positive regulation of skeletal muscle fiber development	2.15e-06	0.000463	18.63	17529	8	588	5	[Myog - myogenin, Lmod3 - leiomodin 3 (fetal), Actn3 - actinin alpha 3, Myod1 - myogenic differentiation 1, Myf6 - myogenic factor 6]
GO:0097435	supramolecular fiber organization	2.88e-06	0.000612	2.6	17529	333	588	29	[Myoz2 - myozenin 2, Fgf13 - fibroblast growth factor 13, Cfl2 - cofilin 2, muscle, Des - desmin, Clrn1 - clarin 1, Mapt - microtubule-associated protein tau, Myl2 - myosin, light chain 2, regulatory, cardiac, slow, Tcap - titin-cap, Capn3 - calpain 3, Tmod4 - tropomodulin 4, Klhl41 - kelch-like family member 41, Myoz1 - myozenin 1, Cap2 - cap, adenylate cyclase-associated protein, 2 (yeast), Tpm…
GO:0010880	regulation of release of sequestered calcium ion into cytosol by sarcoplasmic reticulum	3.56e-06	0.000745	9.94	17529	21	588	7	[Casq1 - calsequestrin 1 (fast-twitch, skeletal muscle), Trdn - triadin, Dhrs7c - dehydrogenase/reductase (sdr family) member 7c, Hrc - histidine rich calcium binding protein, Casq2 - calsequestrin 2 (cardiac muscle), Nol3 - nucleolar protein 3 (apoptosis repressor with card domain), Pln - phospholamban]
GO:0016051	carbohydrate biosynthetic process	3.72e-06	0.000769	4.35	17529	96	588	14	[Acadm - acyl-coa dehydrogenase, c-4 to c-12 straight chain, Ppp1r3c - protein phosphatase 1, regulatory subunit 3c, Pgm1 - phosphoglucomutase 1, Gyg1 - glycogenin 1, Pgam2 - phosphoglycerate mutase 2 (muscle), Agl - amylo-alpha-1, 6-glucosidase, 4-alpha-glucanotransferase, Ndufab1 - nadh dehydrogenase (ubiquinone) 1, alpha/beta subcomplex, 1, Atf3 - activating transcription factor 3, Fbp2 - fruc…
GO:0060415	muscle tissue morphogenesis	3.81e-06	0.000777	5.04	17529	71	588	12	[Mylk2 - myosin light chain kinase 2, Myh7 - myosin, heavy chain 7, cardiac muscle, beta, Myl2 - myosin, light chain 2, regulatory, cardiac, slow, Tcap - titin-cap, Pitx2 - paired-like homeodomain 2, Prox1 - prospero homeobox 1, Tnni1 - troponin i type 1 (skeletal, slow), Ankrd1 - ankyrin repeat domain 1, Nog - noggin, Xirp2 - xin actin-binding repeat containing 2, Myl3 - myosin, light chain 3, a…
GO:0055008	cardiac muscle tissue morphogenesis	4.24e-06	0.000854	5.47	17529	60	588	11	[Mylk2 - myosin light chain kinase 2, Myh7 - myosin, heavy chain 7, cardiac muscle, beta, Myl2 - myosin, light chain 2, regulatory, cardiac, slow, Tcap - titin-cap, Pitx2 - paired-like homeodomain 2, Prox1 - prospero homeobox 1, Tnni1 - troponin i type 1 (skeletal, slow), Ankrd1 - ankyrin repeat domain 1, Nog - noggin, Xirp2 - xin actin-binding repeat containing 2, Myl3 - myosin, light chain 3, a…
GO:0006631	fatty acid metabolic process	4.46e-06	0.000885	2.77	17529	269	588	25	[Ankrd23 - ankyrin repeat domain 23, Acadm - acyl-coa dehydrogenase, c-4 to c-12 straight chain, Ghr - growth hormone receptor, Ndufab1 - nadh dehydrogenase (ubiquinone) 1, alpha/beta subcomplex, 1, Fabp3 - fatty acid binding protein 3, muscle and heart, Cpt1b - carnitine palmitoyltransferase 1b, muscle, Scd - stearoyl-coa desaturase (delta-9-desaturase), Fabp4 - fatty acid binding protein 4, adi…
GO:0098655	cation transmembrane transport	5.35e-06	0.00105	2.14	17529	557	588	40	[Slc25a29 - solute carrier family 25 (mitochondrial carnitine/acylcarnitine carrier), member 29, Atp5e - atp synthase, h+ transporting, mitochondrial f1 complex, epsilon subunit, Cacng1 - calcium channel, voltage-dependent, gamma subunit 1, Atp5l - atp synthase, h+ transporting, mitochondrial fo complex, subunit g, Cox7c - cytochrome c oxidase, subunit viic, Atp5i - atp synthase, h+ transporting,…
GO:0030240	skeletal muscle thin filament assembly	6.1e-06	0.00118	23.85	17529	5	588	4	[Acta1 - actin, alpha 1, skeletal muscle, Lmod3 - leiomodin 3 (fetal), Tcap - titin-cap, Prox1 - prospero homeobox 1]
GO:0022898	regulation of transmembrane transporter activity	6.41e-06	0.00122	2.94	17529	223	588	22	[Rrad - ras-related associated with diabetes, Scn1b - sodium channel, voltage-gated, type i, beta, Fhl1 - four and a half lim domains 1, Hrc - histidine rich calcium binding protein, Fxyd1 - fxyd domain-containing ion transport regulator 1, Actn2 - actinin alpha 2, Atp1a2 - atpase, na+/k+ transporting, alpha 2 polypeptide, Rangrf - ran guanine nucleotide release factor, Trdn - triadin, Wnk2 - wnk…
GO:0044255	cellular lipid metabolic process	7.45e-06	0.00141	1.95	17529	732	588	48	[St3gal6 - st3 beta-galactoside alpha-2,3-sialyltransferase 6, Pla2g16 - phospholipase a2, group xvi, Ankrd23 - ankyrin repeat domain 23, Acadm - acyl-coa dehydrogenase, c-4 to c-12 straight chain, Aldh1a2 - aldehyde dehydrogenase 1 family, member a2, Ghr - growth hormone receptor, Ndufab1 - nadh dehydrogenase (ubiquinone) 1, alpha/beta subcomplex, 1, Apoc1 - apolipoprotein c-i, Fitm2 - fat stora…
GO:0033108	mitochondrial respiratory chain complex assembly	8.15e-06	0.00152	5.12	17529	64	588	11	[Immp1l - imp1 inner mitochondrial membrane peptidase-like (s. cerevisiae), Ndufa5 - nadh dehydrogenase (ubiquinone) 1 alpha subcomplex 5, Ndufs4 - nadh dehydrogenase (ubiquinone) fe-s protein 4, Ndufa2 - nadh dehydrogenase (ubiquinone) 1 alpha subcomplex, 2, Ndufb9 - nadh dehydrogenase (ubiquinone) 1 beta subcomplex, 9, Ndufab1 - nadh dehydrogenase (ubiquinone) 1, alpha/beta subcomplex, 1, Cox17…
GO:2000291	regulation of myoblast proliferation	8.34e-06	0.00154	11.18	17529	16	588	6	[Ankrd2 - ankyrin repeat domain 2 (stretch responsive muscle), Meis2 - meis homeobox 2, Pitx2 - paired-like homeodomain 2, Myod1 - myogenic differentiation 1, Klhl41 - kelch-like family member 41, Mstn - myostatin]
GO:0006733	oxidoreduction coenzyme metabolic process	8.62e-06	0.00157	4.05	17529	103	588	14	[Coq2 - coenzyme q2 4-hydroxybenzoate polyprenyltransferase, Idh3B - isocitrate dehydrogenase 3 (nad+) beta, Coq10a - coenzyme q10 homolog a (s. cerevisiae), Ldhb - lactate dehydrogenase b, Pgam2 - phosphoglycerate mutase 2 (muscle), Pfkm - phosphofructokinase, muscle, Coq3 - coenzyme q3 homolog, methyltransferase (s. cerevisiae), Mpc2 - mitochondrial pyruvate carrier 2, Fmo2 - flavin containing …
GO:0014732	skeletal muscle atrophy	9.15e-06	0.00165	14.91	17529	10	588	5	[Trim63 - tripartite motif containing 63, e3 ubiquitin protein ligase, Myog - myogenin, Actn3 - actinin alpha 3, Myod1 - myogenic differentiation 1, Mstn - myostatin]
GO:0034637	cellular carbohydrate biosynthetic process	1.03e-05	0.00183	6.24	17529	43	588	9	[Ppp1r3c - protein phosphatase 1, regulatory subunit 3c, Pgm1 - phosphoglucomutase 1, Got1 - glutamic-oxaloacetic transaminase 1, soluble, Acadm - acyl-coa dehydrogenase, c-4 to c-12 straight chain, Gyg1 - glycogenin 1, Agl - amylo-alpha-1, 6-glucosidase, 4-alpha-glucanotransferase, Phkg1 - phosphorylase kinase, gamma 1, Fbp2 - fructose-1,6-bisphosphatase 2, Prkag3 - protein kinase, amp-activated…
GO:0098660	inorganic ion transmembrane transport	1.09e-05	0.00191	2.08	17529	574	588	40	[Atp5e - atp synthase, h+ transporting, mitochondrial f1 complex, epsilon subunit, Cacng1 - calcium channel, voltage-dependent, gamma subunit 1, Atp5l - atp synthase, h+ transporting, mitochondrial fo complex, subunit g, Cox7c - cytochrome c oxidase, subunit viic, Atp5i - atp synthase, h+ transporting, mitochondrial fo complex, subunit e, Ndufa4 - nadh dehydrogenase (ubiquinone) 1 alpha subcomple…
GO:0008016	regulation of heart contraction	1.12e-05	0.00195	3.25	17529	165	588	18	[Scn1b - sodium channel, voltage-gated, type i, beta, Popdc2 - popeye domain containing 2, Hrc - histidine rich calcium binding protein, Fxyd1 - fxyd domain-containing ion transport regulator 1, Myl2 - myosin, light chain 2, regulatory, cardiac, slow, Dmpk - dystrophia myotonica-protein kinase, Atp1a2 - atpase, na+/k+ transporting, alpha 2 polypeptide, Snta1 - syntrophin, alpha 1, Rangrf - ran gu…
GO:0098662	inorganic cation transmembrane transport	1.15e-05	0.00198	2.17	17529	494	588	36	[Atp5e - atp synthase, h+ transporting, mitochondrial f1 complex, epsilon subunit, Cacng1 - calcium channel, voltage-dependent, gamma subunit 1, Atp5l - atp synthase, h+ transporting, mitochondrial fo complex, subunit g, Cox7c - cytochrome c oxidase, subunit viic, Atp5i - atp synthase, h+ transporting, mitochondrial fo complex, subunit e, Ndufa4 - nadh dehydrogenase (ubiquinone) 1 alpha subcomple…
GO:0022900	electron transport chain	1.29e-05	0.00219	4.89	17529	67	588	11	[Cyb561 - cytochrome b-561, Ndufv2 - nadh dehydrogenase (ubiquinone) flavoprotein 2, Sdhd - succinate dehydrogenase complex, subunit d, integral membrane protein, Ndufa5 - nadh dehydrogenase (ubiquinone) 1 alpha subcomplex 5, Ndufs4 - nadh dehydrogenase (ubiquinone) fe-s protein 4, Ndufb9 - nadh dehydrogenase (ubiquinone) 1 beta subcomplex, 9, Cox8b - cytochrome c oxidase, subunit viiib, Cox7c - …
GO:0032412	regulation of ion transmembrane transporter activity	1.3e-05	0.00218	2.9	17529	216	588	21	[Rrad - ras-related associated with diabetes, Scn1b - sodium channel, voltage-gated, type i, beta, Fhl1 - four and a half lim domains 1, Hrc - histidine rich calcium binding protein, Fxyd1 - fxyd domain-containing ion transport regulator 1, Actn2 - actinin alpha 2, Atp1a2 - atpase, na+/k+ transporting, alpha 2 polypeptide, Rangrf - ran guanine nucleotide release factor, Trdn - triadin, Wnk2 - wnk…
GO:0006818	hydrogen transport	1.3e-05	0.00216	3.7	17529	121	588	15	[Ucp3 - uncoupling protein 3 (mitochondrial, proton carrier), Cox6c - cytochrome c oxidase, subunit vic, Atp5e - atp synthase, h+ transporting, mitochondrial f1 complex, epsilon subunit, Atp5l - atp synthase, h+ transporting, mitochondrial fo complex, subunit g, Cox7c - cytochrome c oxidase, subunit viic, Atp5i - atp synthase, h+ transporting, mitochondrial fo complex, subunit e, Ndufa4 - nadh de…
GO:0032409	regulation of transporter activity	1.48e-05	0.00243	2.79	17529	235	588	22	[Rrad - ras-related associated with diabetes, Scn1b - sodium channel, voltage-gated, type i, beta, Fhl1 - four and a half lim domains 1, Hrc - histidine rich calcium binding protein, Fxyd1 - fxyd domain-containing ion transport regulator 1, Actn2 - actinin alpha 2, Atp1a2 - atpase, na+/k+ transporting, alpha 2 polypeptide, Rangrf - ran guanine nucleotide release factor, Trdn - triadin, Wnk2 - wnk…
GO:0014891	striated muscle atrophy	1.63e-05	0.00265	13.55	17529	11	588	5	[Trim63 - tripartite motif containing 63, e3 ubiquitin protein ligase, Myog - myogenin, Myod1 - myogenic differentiation 1, Actn3 - actinin alpha 3, Mstn - myostatin]
GO:0002074	extraocular skeletal muscle development	1.78e-05	0.00287	19.87	17529	6	588	4	[Myom1 - myomesin 1, Cacna1s - calcium channel, voltage-dependent, l type, alpha 1s subunit, Myom2 - myomesin 2, Pitx2 - paired-like homeodomain 2]
GO:2001014	regulation of skeletal muscle cell differentiation	1.83e-05	0.00291	9.94	17529	18	588	6	[Mef2c - myocyte enhancer factor 2c, Six1 - six homeobox 1, Capn3 - calpain 3, Rbfox1 - rna binding protein, fox-1 homolog (c. elegans) 1, Klhl41 - kelch-like family member 41, Mstn - myostatin]
GO:0046716	muscle cell cellular homeostasis	1.83e-05	0.00288	9.94	17529	18	588	6	[Cfl2 - cofilin 2, muscle, Cav3 - caveolin 3, Chrna1 - cholinergic receptor, nicotinic, alpha 1 (muscle), Aldoa - aldolase a, fructose-bisphosphate, Pfkm - phosphofructokinase, muscle, Mstn - myostatin]
GO:0055085	transmembrane transport	2.05e-05	0.00319	1.74	17529	1029	588	60	[Slc25a29 - solute carrier family 25 (mitochondrial carnitine/acylcarnitine carrier), member 29, Fxyd1 - fxyd domain-containing ion transport regulator 1, Cacng1 - calcium channel, voltage-dependent, gamma subunit 1, Atp5l - atp synthase, h+ transporting, mitochondrial fo complex, subunit g, Atp5i - atp synthase, h+ transporting, mitochondrial fo complex, subunit e, Ndufa4 - nadh dehydrogenase (u…
GO:0019752	carboxylic acid metabolic process	2.31e-05	0.00357	1.9	17529	721	588	46	[Idh3B - isocitrate dehydrogenase 3 (nad+) beta, Sdhd - succinate dehydrogenase complex, subunit d, integral membrane protein, Ankrd23 - ankyrin repeat domain 23, Acadm - acyl-coa dehydrogenase, c-4 to c-12 straight chain, Aldh1a2 - aldehyde dehydrogenase 1 family, member a2, Ghr - growth hormone receptor, Grhpr - glyoxylate reductase/hydroxypyruvate reductase, Ndufab1 - nadh dehydrogenase (ubiqu…
GO:1902600	hydrogen ion transmembrane transport	2.35e-05	0.00359	3.95	17529	98	588	13	[Ucp3 - uncoupling protein 3 (mitochondrial, proton carrier), Cox6c - cytochrome c oxidase, subunit vic, Atp5e - atp synthase, h+ transporting, mitochondrial f1 complex, epsilon subunit, Atp5l - atp synthase, h+ transporting, mitochondrial fo complex, subunit g, Cox7c - cytochrome c oxidase, subunit viic, Atp5i - atp synthase, h+ transporting, mitochondrial fo complex, subunit e, Ndufa4 - nadh de…
GO:0043623	cellular protein complex assembly	2.39e-05	0.00362	2.46	17529	315	588	26	[Fgf13 - fibroblast growth factor 13, Ndufs4 - nadh dehydrogenase (ubiquinone) fe-s protein 4, Tcap - titin-cap, Ndufab1 - nadh dehydrogenase (ubiquinone) 1, alpha/beta subcomplex, 1, Pde4dip - phosphodiesterase 4d interacting protein, Ndufb2 - nadh dehydrogenase (ubiquinone) 1 beta subcomplex, 2, Casq1 - calsequestrin 1 (fast-twitch, skeletal muscle), Vamp1 - vesicle-associated membrane protein …
GO:0044275	cellular carbohydrate catabolic process	2.59e-05	0.00389	9.41	17529	19	588	6	[Agl - amylo-alpha-1, 6-glucosidase, 4-alpha-glucanotransferase, Stbd1 - starch binding domain 1, Pygm - phosphorylase, glycogen, muscle, Pfkm - phosphofructokinase, muscle, Gpd2 - glycerol-3-phosphate dehydrogenase 2, mitochondrial, Neu2 - sialidase 2]
GO:1903169	regulation of calcium ion transmembrane transport	2.71e-05	0.00403	3.31	17529	144	588	16	[Dhrs7c - dehydrogenase/reductase (sdr family) member 7c, Rrad - ras-related associated with diabetes, Hrc - histidine rich calcium binding protein, Capn3 - calpain 3, Atp1a2 - atpase, na+/k+ transporting, alpha 2 polypeptide, Casq1 - calsequestrin 1 (fast-twitch, skeletal muscle), Trdn - triadin, Cav3 - caveolin 3, Jsrp1 - junctional sarcoplasmic reticulum protein 1, Casq2 - calsequestrin 2 (car…
GO:0070271	protein complex biogenesis	2.78e-05	0.00408	4.97	17529	60	588	10	[Ndufa5 - nadh dehydrogenase (ubiquinone) 1 alpha subcomplex 5, Ndufs4 - nadh dehydrogenase (ubiquinone) fe-s protein 4, Ndufa2 - nadh dehydrogenase (ubiquinone) 1 alpha subcomplex, 2, Ndufb9 - nadh dehydrogenase (ubiquinone) 1 beta subcomplex, 9, Ndufab1 - nadh dehydrogenase (ubiquinone) 1, alpha/beta subcomplex, 1, Cox17 - cox17 cytochrome c oxidase copper chaperone, Lyrm7 - lyr motif containin…
GO:0006082	organic acid metabolic process	3.37e-05	0.00491	1.84	17529	776	588	48	[Idh3B - isocitrate dehydrogenase 3 (nad+) beta, Ankrd23 - ankyrin repeat domain 23, Sdhd - succinate dehydrogenase complex, subunit d, integral membrane protein, Acadm - acyl-coa dehydrogenase, c-4 to c-12 straight chain, Aldh1a2 - aldehyde dehydrogenase 1 family, member a2, Ghr - growth hormone receptor, Ndufab1 - nadh dehydrogenase (ubiquinone) 1, alpha/beta subcomplex, 1, Grhpr - glyoxylate r…
GO:0015672	monovalent inorganic cation transport	3.39e-05	0.00489	2.28	17529	379	588	29	[Fgf13 - fibroblast growth factor 13, Atp5e - atp synthase, h+ transporting, mitochondrial f1 complex, epsilon subunit, Fxyd1 - fxyd domain-containing ion transport regulator 1, Atp5l - atp synthase, h+ transporting, mitochondrial fo complex, subunit g, Cox7c - cytochrome c oxidase, subunit viic, Atp5i - atp synthase, h+ transporting, mitochondrial fo complex, subunit e, Ndufa4 - nadh dehydrogena…
GO:0042692	muscle cell differentiation	3.62e-05	0.00517	3.8	17529	102	588	13	[Smarcd3 - swi/snf related, matrix associated, actin dependent regulator of chromatin, subfamily d, member 3, Acadm - acyl-coa dehydrogenase, c-4 to c-12 straight chain, Myog - myogenin, Six1 - six homeobox 1, Myod1 - myogenic differentiation 1, Trdn - triadin, Mef2c - myocyte enhancer factor 2c, Cav3 - caveolin 3, Pitx2 - paired-like homeodomain 2, Prox1 - prospero homeobox 1, Klhl40 - kelch-lik…
GO:0003010	voluntary skeletal muscle contraction	3.76e-05	0.00532	29.81	17529	3	588	3	[Mb - myoglobin, Synm - synemin, intermediate filament protein, Tnnt1 - troponin t type 1 (skeletal, slow)]
GO:0014721	twitch skeletal muscle contraction	3.76e-05	0.00527	29.81	17529	3	588	3	[Mb - myoglobin, Synm - synemin, intermediate filament protein, Tnnt1 - troponin t type 1 (skeletal, slow)]
GO:0035995	detection of muscle stretch	3.76e-05	0.00522	29.81	17529	3	588	3	[Cav3 - caveolin 3, Tcap - titin-cap, Csrp3 - cysteine and glycine-rich protein 3 (cardiac lim protein)]
GO:0031448	positive regulation of fast-twitch skeletal muscle fiber contraction	3.76e-05	0.00517	29.81	17529	3	588	3	[Mylk2 - myosin light chain kinase 2, Actn3 - actinin alpha 3, Atp2a1 - atpase, ca++ transporting, cardiac muscle, fast twitch 1]
GO:0031446	regulation of fast-twitch skeletal muscle fiber contraction	3.76e-05	0.00513	29.81	17529	3	588	3	[Mylk2 - myosin light chain kinase 2, Actn3 - actinin alpha 3, Atp2a1 - atpase, ca++ transporting, cardiac muscle, fast twitch 1]
GO:0048742	regulation of skeletal muscle fiber development	4.3e-05	0.00581	11.47	17529	13	588	5	[Myog - myogenin, Lmod3 - leiomodin 3 (fetal), Actn3 - actinin alpha 3, Myod1 - myogenic differentiation 1, Myf6 - myogenic factor 6]
GO:0043502	regulation of muscle adaptation	4.37e-05	0.00585	4.31	17529	76	588	11	[Trim63 - tripartite motif containing 63, e3 ubiquitin protein ligase, Mef2c - myocyte enhancer factor 2c, Myog - myogenin, Myh7 - myosin, heavy chain 7, cardiac muscle, beta, Tnnt1 - troponin t type 1 (skeletal, slow), Cav3 - caveolin 3, Actn3 - actinin alpha 3, Rgs2 - regulator of g-protein signaling 2, Slc25a4 - solute carrier family 25 (mitochondrial carrier; adenine nucleotide translocator),…
GO:0043436	oxoacid metabolic process	4.37e-05	0.00581	1.84	17529	762	588	47	[Idh3B - isocitrate dehydrogenase 3 (nad+) beta, Sdhd - succinate dehydrogenase complex, subunit d, integral membrane protein, Ankrd23 - ankyrin repeat domain 23, Acadm - acyl-coa dehydrogenase, c-4 to c-12 straight chain, Aldh1a2 - aldehyde dehydrogenase 1 family, member a2, Ghr - growth hormone receptor, Grhpr - glyoxylate reductase/hydroxypyruvate reductase, Ndufab1 - nadh dehydrogenase (ubiqu…
GO:0010959	regulation of metal ion transport	4.51e-05	0.00594	2.25	17529	385	588	29	[Rrad - ras-related associated with diabetes, Hrc - histidine rich calcium binding protein, Il16 - interleukin 16, Fxyd1 - fxyd domain-containing ion transport regulator 1, Capn3 - calpain 3, Dmpk - dystrophia myotonica-protein kinase, Wnk2 - wnk lysine deficient protein kinase 2, Casq1 - calsequestrin 1 (fast-twitch, skeletal muscle), Scn4b - sodium channel, voltage-gated, type iv, beta, Cav3 - …
GO:0033692	cellular polysaccharide biosynthetic process	4.79e-05	0.00626	6.96	17529	30	588	7	[Ppp1r3c - protein phosphatase 1, regulatory subunit 3c, Pgm1 - phosphoglucomutase 1, Acadm - acyl-coa dehydrogenase, c-4 to c-12 straight chain, Gyg1 - glycogenin 1, Agl - amylo-alpha-1, 6-glucosidase, 4-alpha-glucanotransferase, Phkg1 - phosphorylase kinase, gamma 1, Prkag3 - protein kinase, amp-activated, gamma 3 non-catalytic subunit]
GO:0014902	myotube differentiation	4.9e-05	0.00635	8.52	17529	21	588	6	[Trdn - triadin, Mef2c - myocyte enhancer factor 2c, Myog - myogenin, Cav3 - caveolin 3, Myod1 - myogenic differentiation 1, Klhl40 - kelch-like family member 40]
GO:0015992	proton transport	4.98e-05	0.0064	3.48	17529	120	588	14	[Ucp3 - uncoupling protein 3 (mitochondrial, proton carrier), Cox6c - cytochrome c oxidase, subunit vic, Atp5e - atp synthase, h+ transporting, mitochondrial f1 complex, epsilon subunit, Atp5l - atp synthase, h+ transporting, mitochondrial fo complex, subunit g, Cox7c - cytochrome c oxidase, subunit viic, Atp5i - atp synthase, h+ transporting, mitochondrial fo complex, subunit e, Ndufa4 - nadh de…
GO:0003008	system process	5.16e-05	0.00657	1.57	17529	1442	588	76	[Fgf13 - fibroblast growth factor 13, Mb - myoglobin, Trim63 - tripartite motif containing 63, e3 ubiquitin protein ligase, Rpgrip1 - retinitis pigmentosa gtpase regulator interacting protein 1, Myog - myogenin, Mapt - microtubule-associated protein tau, Tcap - titin-cap, Grhpr - glyoxylate reductase/hydroxypyruvate reductase, Tmod4 - tropomodulin 4, Stac3 - sh3 and cysteine rich domain 3, Mstn -…
GO:0045445	myoblast differentiation	6.01e-05	0.00759	6.73	17529	31	588	7	[Ankrd2 - ankyrin repeat domain 2 (stretch responsive muscle), Myog - myogenin, Myod1 - myogenic differentiation 1, Mapk12 - mitogen-activated protein kinase 12, Nol3 - nucleolar protein 3 (apoptosis repressor with card domain), Ankrd1 - ankyrin repeat domain 1, Asb2 - ankyrin repeat and socs box-containing 2]
GO:0014877	response to muscle inactivity involved in regulation of muscle adaptation	6.5e-05	0.00814	10.65	17529	14	588	5	[Casq1 - calsequestrin 1 (fast-twitch, skeletal muscle), Trim63 - tripartite motif containing 63, e3 ubiquitin protein ligase, Myog - myogenin, Sgca - sarcoglycan, alpha (dystrophin-associated glycoprotein), Actn3 - actinin alpha 3]
GO:0014894	response to denervation involved in regulation of muscle adaptation	6.5e-05	0.00808	10.65	17529	14	588	5	[Casq1 - calsequestrin 1 (fast-twitch, skeletal muscle), Trim63 - tripartite motif containing 63, e3 ubiquitin protein ligase, Myog - myogenin, Sgca - sarcoglycan, alpha (dystrophin-associated glycoprotein), Actn3 - actinin alpha 3]
GO:0035994	response to muscle stretch	6.55e-05	0.00807	8.13	17529	22	588	6	[Ankrd23 - ankyrin repeat domain 23, Cav3 - caveolin 3, Tcap - titin-cap, Myod1 - myogenic differentiation 1, Ankrd1 - ankyrin repeat domain 1, Csrp3 - cysteine and glycine-rich protein 3 (cardiac lim protein)]
GO:1902305	regulation of sodium ion transmembrane transport	6.98e-05	0.00854	4.97	17529	54	588	9	[Wnk2 - wnk lysine deficient protein kinase 2, Scn4b - sodium channel, voltage-gated, type iv, beta, Scn1b - sodium channel, voltage-gated, type i, beta, Cav3 - caveolin 3, Fxyd1 - fxyd domain-containing ion transport regulator 1, Ptpn3 - protein tyrosine phosphatase, non-receptor type 3, Snta1 - syntrophin, alpha 1, Atp1a2 - atpase, na+/k+ transporting, alpha 2 polypeptide, Rangrf - ran guanine …
GO:0000271	polysaccharide biosynthetic process	7.47e-05	0.00907	6.52	17529	32	588	7	[Ppp1r3c - protein phosphatase 1, regulatory subunit 3c, Pgm1 - phosphoglucomutase 1, Acadm - acyl-coa dehydrogenase, c-4 to c-12 straight chain, Gyg1 - glycogenin 1, Agl - amylo-alpha-1, 6-glucosidase, 4-alpha-glucanotransferase, Phkg1 - phosphorylase kinase, gamma 1, Prkag3 - protein kinase, amp-activated, gamma 3 non-catalytic subunit]
GO:0010257	NADH dehydrogenase complex assembly	7.85e-05	0.00945	5.55	17529	43	588	8	[Ndufa5 - nadh dehydrogenase (ubiquinone) 1 alpha subcomplex 5, Ndufs4 - nadh dehydrogenase (ubiquinone) fe-s protein 4, Ndufa2 - nadh dehydrogenase (ubiquinone) 1 alpha subcomplex, 2, Ndufb9 - nadh dehydrogenase (ubiquinone) 1 beta subcomplex, 9, Ndufab1 - nadh dehydrogenase (ubiquinone) 1, alpha/beta subcomplex, 1, Ndufb11 - nadh dehydrogenase (ubiquinone) 1 beta subcomplex, 11, Ndufc1 - nadh d…
GO:0097031	mitochondrial respiratory chain complex I biogenesis	7.85e-05	0.00938	5.55	17529	43	588	8	[Ndufa5 - nadh dehydrogenase (ubiquinone) 1 alpha subcomplex 5, Ndufs4 - nadh dehydrogenase (ubiquinone) fe-s protein 4, Ndufa2 - nadh dehydrogenase (ubiquinone) 1 alpha subcomplex, 2, Ndufb9 - nadh dehydrogenase (ubiquinone) 1 beta subcomplex, 9, Ndufab1 - nadh dehydrogenase (ubiquinone) 1, alpha/beta subcomplex, 1, Ndufb11 - nadh dehydrogenase (ubiquinone) 1 beta subcomplex, 11, Ndufc1 - nadh d…
GO:0032981	mitochondrial respiratory chain complex I assembly	7.85e-05	0.00931	5.55	17529	43	588	8	[Ndufa5 - nadh dehydrogenase (ubiquinone) 1 alpha subcomplex 5, Ndufs4 - nadh dehydrogenase (ubiquinone) fe-s protein 4, Ndufa2 - nadh dehydrogenase (ubiquinone) 1 alpha subcomplex, 2, Ndufb9 - nadh dehydrogenase (ubiquinone) 1 beta subcomplex, 9, Ndufab1 - nadh dehydrogenase (ubiquinone) 1, alpha/beta subcomplex, 1, Ndufb11 - nadh dehydrogenase (ubiquinone) 1 beta subcomplex, 11, Ndufc1 - nadh d…
GO:0048739	cardiac muscle fiber development	7.88e-05	0.00926	14.91	17529	8	588	4	[Myo18b - myosin xviiib, Tcap - titin-cap, Mypn - myopalladin, Nexn - nexilin (f actin binding protein)]
GO:0009167	purine ribonucleoside monophosphate metabolic process	7.95e-05	0.00928	3.17	17529	141	588	15	[Adsl - adenylosuccinate lyase, Pgam2 - phosphoglycerate mutase 2 (muscle), Atp5e - atp synthase, h+ transporting, mitochondrial f1 complex, epsilon subunit, Tefm - transcription elongation factor, mitochondrial, Atp5l - atp synthase, h+ transporting, mitochondrial fo complex, subunit g, Adssl1 - adenylosuccinate synthase like 1, Atp5i - atp synthase, h+ transporting, mitochondrial fo complex, su…
GO:0009127	purine nucleoside monophosphate biosynthetic process	8.11e-05	0.00939	4.88	17529	55	588	9	[Adsl - adenylosuccinate lyase, Atp5e - atp synthase, h+ transporting, mitochondrial f1 complex, epsilon subunit, Atp5l - atp synthase, h+ transporting, mitochondrial fo complex, subunit g, Adssl1 - adenylosuccinate synthase like 1, Atp5i - atp synthase, h+ transporting, mitochondrial fo complex, subunit e, Ampd1 - adenosine monophosphate deaminase 1, Aldoa - aldolase a, fructose-bisphosphate, At…
GO:0009168	purine ribonucleoside monophosphate biosynthetic process	8.11e-05	0.00932	4.88	17529	55	588	9	[Adsl - adenylosuccinate lyase, Atp5e - atp synthase, h+ transporting, mitochondrial f1 complex, epsilon subunit, Atp5l - atp synthase, h+ transporting, mitochondrial fo complex, subunit g, Adssl1 - adenylosuccinate synthase like 1, Atp5i - atp synthase, h+ transporting, mitochondrial fo complex, subunit e, Ampd1 - adenosine monophosphate deaminase 1, Aldoa - aldolase a, fructose-bisphosphate, At…
GO:2000021	regulation of ion homeostasis	8.28e-05	0.00945	2.71	17529	209	588	19	[Dhrs7c - dehydrogenase/reductase (sdr family) member 7c, Scn1b - sodium channel, voltage-gated, type i, beta, Fhl1 - four and a half lim domains 1, Hrc - histidine rich calcium binding protein, Capn3 - calpain 3, Xcr1 - chemokine (c motif) receptor 1, Rangrf - ran guanine nucleotide release factor, Casq1 - calsequestrin 1 (fast-twitch, skeletal muscle), Trdn - triadin, Wnk2 - wnk lysine deficien…
GO:0043403	skeletal muscle tissue regeneration	8.61e-05	0.00975	7.78	17529	23	588	6	[Myog - myogenin, Sgca - sarcoglycan, alpha (dystrophin-associated glycoprotein), Myod1 - myogenic differentiation 1, Eno3 - enolase 3, beta, muscle, Myf6 - myogenic factor 6, Mstn - myostatin]
GO:0009126	purine nucleoside monophosphate metabolic process	8.62e-05	0.0097	3.15	17529	142	588	15	[Adsl - adenylosuccinate lyase, Pgam2 - phosphoglycerate mutase 2 (muscle), Atp5e - atp synthase, h+ transporting, mitochondrial f1 complex, epsilon subunit, Tefm - transcription elongation factor, mitochondrial, Atp5l - atp synthase, h+ transporting, mitochondrial fo complex, subunit g, Adssl1 - adenylosuccinate synthase like 1, Atp5i - atp synthase, h+ transporting, mitochondrial fo complex, su…
GO:0051282	regulation of sequestering of calcium ion	8.82e-05	0.00984	3.49	17529	111	588	13	[Dhrs7c - dehydrogenase/reductase (sdr family) member 7c, Hrc - histidine rich calcium binding protein, Capn3 - calpain 3, Xcr1 - chemokine (c motif) receptor 1, Casq1 - calsequestrin 1 (fast-twitch, skeletal muscle), Trdn - triadin, Slc25a23 - solute carrier family 25 (mitochondrial carrier; phosphate carrier), member 23, Jsrp1 - junctional sarcoplasmic reticulum protein 1, Casq2 - calsequestrin…
GO:0051289	protein homotetramerization	0.000111	0.0123	3.9	17529	84	588	11	[Acadm - acyl-coa dehydrogenase, c-4 to c-12 straight chain, Acadl - acyl-coa dehydrogenase, long chain, Rxrg - retinoid x receptor gamma, Tp63 - tumor protein p63, Actn2 - actinin alpha 2, Pfkm - phosphofructokinase, muscle, Aldoa - aldolase a, fructose-bisphosphate, Ryr1 - ryanodine receptor 1 (skeletal), Aldh1a1 - aldehyde dehydrogenase 1 family, member a1, Acot13 - acyl-coa thioesterase 13, A…
GO:0014850	response to muscle activity	0.000112	0.0123	7.45	17529	24	588	6	[Adsl - adenylosuccinate lyase, Srl - sarcalumenin, Myog - myogenin, Capn3 - calpain 3, Adssl1 - adenylosuccinate synthase like 1, Mstn - myostatin]
GO:2000649	regulation of sodium ion transmembrane transporter activity	0.000129	0.0141	5.18	17529	46	588	8	[Wnk2 - wnk lysine deficient protein kinase 2, Scn4b - sodium channel, voltage-gated, type iv, beta, Scn1b - sodium channel, voltage-gated, type i, beta, Cav3 - caveolin 3, Fxyd1 - fxyd domain-containing ion transport regulator 1, Ptpn3 - protein tyrosine phosphatase, non-receptor type 3, Atp1a2 - atpase, na+/k+ transporting, alpha 2 polypeptide, Rangrf - ran guanine nucleotide release factor]
GO:0014870	response to muscle inactivity	0.000134	0.0145	9.32	17529	16	588	5	[Casq1 - calsequestrin 1 (fast-twitch, skeletal muscle), Trim63 - tripartite motif containing 63, e3 ubiquitin protein ligase, Myog - myogenin, Sgca - sarcoglycan, alpha (dystrophin-associated glycoprotein), Actn3 - actinin alpha 3]
GO:0014889	muscle atrophy	0.000134	0.0144	9.32	17529	16	588	5	[Trim63 - tripartite motif containing 63, e3 ubiquitin protein ligase, Myog - myogenin, Myod1 - myogenic differentiation 1, Actn3 - actinin alpha 3, Mstn - myostatin]
GO:0006103	2-oxoglutarate metabolic process	0.000134	0.0143	9.32	17529	16	588	5	[Idh3B - isocitrate dehydrogenase 3 (nad+) beta, Got1 - glutamic-oxaloacetic transaminase 1, soluble, Phyh - phytanoyl-coa 2-hydroxylase, Ghr - growth hormone receptor, Dld - dihydrolipoamide dehydrogenase]
GO:0030388	fructose 1,6-bisphosphate metabolic process	0.000138	0.0147	13.25	17529	9	588	4	[Aldoa - aldolase a, fructose-bisphosphate, Pfkm - phosphofructokinase, muscle, Fbp2 - fructose-1,6-bisphosphatase 2, LOC502894 - hypothetical protein loc502894]
GO:1902109	negative regulation of mitochondrial membrane permeability involved in apoptotic process	0.000146	0.0154	22.36	17529	4	588	3	[Bnip3 - bcl2/adenovirus e1b interacting protein 3, Slc25a4 - solute carrier family 25 (mitochondrial carrier; adenine nucleotide translocator), member 4, Nol3 - nucleolar protein 3 (apoptosis repressor with card domain)]
GO:0009888	tissue development	0.000164	0.0172	1.87	17529	605	588	38	[Bmper - bmp-binding endothelial regulator, Cfl2 - cofilin 2, muscle, Ndufv2 - nadh dehydrogenase (ubiquinone) flavoprotein 2, Myog - myogenin, Aldh1a2 - aldehyde dehydrogenase 1 family, member a2, Tp63 - tumor protein p63, Gata3 - gata binding protein 3, Ets2 - v-ets avian erythroblastosis virus e26 oncogene homolog 2, Pitx1 - paired-like homeodomain 1, Mstn - myostatin, Casq1 - calsequestrin 1 …
GO:0048468	cell development	0.000169	0.0175	1.8	17529	694	588	42	[Rpgrip1 - retinitis pigmentosa gtpase regulator interacting protein 1, Myog - myogenin, Popdc2 - popeye domain containing 2, Aldh1a2 - aldehyde dehydrogenase 1 family, member a2, Tp63 - tumor protein p63, Clrn1 - clarin 1, Myl2 - myosin, light chain 2, regulatory, cardiac, slow, Tcap - titin-cap, Trim54 - tripartite motif-containing 54, Klhl41 - kelch-like family member 41, S100a9 - s100 calcium…
GO:0009161	ribonucleoside monophosphate metabolic process	0.000185	0.0192	2.94	17529	152	588	15	[Adsl - adenylosuccinate lyase, Pgam2 - phosphoglycerate mutase 2 (muscle), Atp5e - atp synthase, h+ transporting, mitochondrial f1 complex, epsilon subunit, Tefm - transcription elongation factor, mitochondrial, Atp5l - atp synthase, h+ transporting, mitochondrial fo complex, subunit g, Adssl1 - adenylosuccinate synthase like 1, Atp5i - atp synthase, h+ transporting, mitochondrial fo complex, su…
GO:0016052	carbohydrate catabolic process	0.000195	0.02	3.97	17529	75	588	10	[Pgm1 - phosphoglucomutase 1, Pgam2 - phosphoglycerate mutase 2 (muscle), Agl - amylo-alpha-1, 6-glucosidase, 4-alpha-glucanotransferase, Stbd1 - starch binding domain 1, Pygm - phosphorylase, glycogen, muscle, Pfkm - phosphofructokinase, muscle, Aldoa - aldolase a, fructose-bisphosphate, Gpd2 - glycerol-3-phosphate dehydrogenase 2, mitochondrial, Eno3 - enolase 3, beta, muscle, Neu2 - sialidase …
GO:0007528	neuromuscular junction development	0.000198	0.0201	5.64	17529	37	588	7	[Ntrk2 - neurotrophic tyrosine kinase, receptor, type 2, Cacna1s - calcium channel, voltage-dependent, l type, alpha 1s subunit, Chrna1 - cholinergic receptor, nicotinic, alpha 1 (muscle), Cacnb1 - calcium channel, voltage-dependent, beta 1 subunit, Snta1 - syntrophin, alpha 1, Ky - kyphoscoliosis peptidase, Col4a5 - collagen, type iv, alpha 5]
GO:0007010	cytoskeleton organization	0.000198	0.0201	1.81	17529	677	588	41	[Myoz2 - myozenin 2, Fgf13 - fibroblast growth factor 13, Cfl2 - cofilin 2, muscle, Des - desmin, Ccl24 - chemokine (c-c motif) ligand 24, Mapt - microtubule-associated protein tau, Myl2 - myosin, light chain 2, regulatory, cardiac, slow, Tcap - titin-cap, Capn3 - calpain 3, Tmod4 - tropomodulin 4, Tuba4a - tubulin, alpha 4a, Klhl41 - kelch-like family member 41, S100a9 - s100 calcium binding pro…
GO:1903522	regulation of blood circulation	0.000206	0.0207	2.53	17529	224	588	19	[Smtnl1 - smoothelin-like 1, Scn1b - sodium channel, voltage-gated, type i, beta, Popdc2 - popeye domain containing 2, Hrc - histidine rich calcium binding protein, Fxyd1 - fxyd domain-containing ion transport regulator 1, Myl2 - myosin, light chain 2, regulatory, cardiac, slow, Dmpk - dystrophia myotonica-protein kinase, Snta1 - syntrophin, alpha 1, Atp1a2 - atpase, na+/k+ transporting, alpha 2 …
GO:0006629	lipid metabolic process	0.000212	0.0211	1.67	17529	930	588	52	[Ankrd23 - ankyrin repeat domain 23, Acadm - acyl-coa dehydrogenase, c-4 to c-12 straight chain, Aldh1a2 - aldehyde dehydrogenase 1 family, member a2, Ghr - growth hormone receptor, Ndufab1 - nadh dehydrogenase (ubiquinone) 1, alpha/beta subcomplex, 1, Lipg - lipase, endothelial, Vldlr - very low density lipoprotein receptor, Fabp3 - fatty acid binding protein 3, muscle and heart, Cav3 - caveolin…
GO:0014883	transition between fast and slow fiber	0.000224	0.0222	11.92	17529	10	588	4	[Myh7 - myosin, heavy chain 7, cardiac muscle, beta, Tnnt1 - troponin t type 1 (skeletal, slow), Actn3 - actinin alpha 3, Tnni1 - troponin i type 1 (skeletal, slow)]
GO:0005980	glycogen catabolic process	0.000224	0.0221	11.92	17529	10	588	4	[Stbd1 - starch binding domain 1, Agl - amylo-alpha-1, 6-glucosidase, 4-alpha-glucanotransferase, Pygm - phosphorylase, glycogen, muscle, Pfkm - phosphofructokinase, muscle]
GO:0044247	cellular polysaccharide catabolic process	0.000224	0.0219	11.92	17529	10	588	4	[Agl - amylo-alpha-1, 6-glucosidase, 4-alpha-glucanotransferase, Stbd1 - starch binding domain 1, Pygm - phosphorylase, glycogen, muscle, Pfkm - phosphofructokinase, muscle]
GO:0009251	glucan catabolic process	0.000224	0.0218	11.92	17529	10	588	4	[Agl - amylo-alpha-1, 6-glucosidase, 4-alpha-glucanotransferase, Stbd1 - starch binding domain 1, Pygm - phosphorylase, glycogen, muscle, Pfkm - phosphofructokinase, muscle]
GO:0048643	positive regulation of skeletal muscle tissue development	0.000225	0.0218	6.62	17529	27	588	6	[Mef2c - myocyte enhancer factor 2c, Myog - myogenin, Lmod3 - leiomodin 3 (fetal), Myod1 - myogenic differentiation 1, Actn3 - actinin alpha 3, Myf6 - myogenic factor 6]
GO:0022904	respiratory electron transport chain	0.000238	0.0229	4.26	17529	63	588	9	[Ndufv2 - nadh dehydrogenase (ubiquinone) flavoprotein 2, Sdhd - succinate dehydrogenase complex, subunit d, integral membrane protein, Ndufa5 - nadh dehydrogenase (ubiquinone) 1 alpha subcomplex 5, Cox8b - cytochrome c oxidase, subunit viiib, Ndufb9 - nadh dehydrogenase (ubiquinone) 1 beta subcomplex, 9, Cox7c - cytochrome c oxidase, subunit viic, Pink1 - pten induced putative kinase 1, Cox6a2 -…
GO:0051279	regulation of release of sequestered calcium ion into cytosol	0.000243	0.0232	3.87	17529	77	588	10	[Casq1 - calsequestrin 1 (fast-twitch, skeletal muscle), Trdn - triadin, Dhrs7c - dehydrogenase/reductase (sdr family) member 7c, Hrc - histidine rich calcium binding protein, Jsrp1 - junctional sarcoplasmic reticulum protein 1, Capn3 - calpain 3, Casq2 - calsequestrin 2 (cardiac muscle), Nol3 - nucleolar protein 3 (apoptosis repressor with card domain), Cxcl9 - chemokine (c-x-c motif) ligand 9, …
GO:0046034	ATP metabolic process	0.000269	0.0256	3.31	17529	108	588	12	[Myh7 - myosin, heavy chain 7, cardiac muscle, beta, Atp5e - atp synthase, h+ transporting, mitochondrial f1 complex, epsilon subunit, Pgam2 - phosphoglycerate mutase 2 (muscle), Tefm - transcription elongation factor, mitochondrial, Atp5l - atp synthase, h+ transporting, mitochondrial fo complex, subunit g, Atp5i - atp synthase, h+ transporting, mitochondrial fo complex, subunit e, Pfkm - phosph…
GO:1901019	regulation of calcium ion transmembrane transporter activity	0.0003	0.0283	3.77	17529	79	588	10	[Trdn - triadin, Rrad - ras-related associated with diabetes, Hrc - histidine rich calcium binding protein, Cav3 - caveolin 3, Jsrp1 - junctional sarcoplasmic reticulum protein 1, Casq2 - calsequestrin 2 (cardiac muscle), Cacnb1 - calcium channel, voltage-dependent, beta 1 subunit, Atp1a2 - atpase, na+/k+ transporting, alpha 2 polypeptide, Sln - sarcolipin, Pln - phospholamban]
GO:0006461	protein complex assembly	0.000322	0.0302	1.65	17529	923	588	51	[Fgf13 - fibroblast growth factor 13, Adsl - adenylosuccinate lyase, Acadm - acyl-coa dehydrogenase, c-4 to c-12 straight chain, Ndufs4 - nadh dehydrogenase (ubiquinone) fe-s protein 4, Mapt - microtubule-associated protein tau, Tcap - titin-cap, Grhpr - glyoxylate reductase/hydroxypyruvate reductase, Ndufab1 - nadh dehydrogenase (ubiquinone) 1, alpha/beta subcomplex, 1, Capn3 - calpain 3, Pde4di…
GO:0016202	regulation of striated muscle tissue development	0.000327	0.0305	2.92	17529	143	588	14	[Myog - myogenin, Six1 - six homeobox 1, Rbfox1 - rna binding protein, fox-1 homolog (c. elegans) 1, Capn3 - calpain 3, Actn3 - actinin alpha 3, Myod1 - myogenic differentiation 1, Klhl41 - kelch-like family member 41, Mstn - myostatin, Mef2c - myocyte enhancer factor 2c, Lmod3 - leiomodin 3 (fetal), Cav3 - caveolin 3, Slc25a4 - solute carrier family 25 (mitochondrial carrier; adenine nucleotide …
GO:1901741	positive regulation of myoblast fusion	0.000328	0.0304	7.85	17529	19	588	5	[Myog - myogenin, Myod1 - myogenic differentiation 1, Cxcl12 - chemokine (c-x-c motif) ligand 12, Cxcl9 - chemokine (c-x-c motif) ligand 9, Myf6 - myogenic factor 6]
GO:0060314	regulation of ryanodine-sensitive calcium-release channel activity	0.000328	0.0302	7.85	17529	19	588	5	[Trdn - triadin, Hrc - histidine rich calcium binding protein, Jsrp1 - junctional sarcoplasmic reticulum protein 1, Casq2 - calsequestrin 2 (cardiac muscle), Pln - phospholamban]
GO:0009156	ribonucleoside monophosphate biosynthetic process	0.00034	0.0311	4.07	17529	66	588	9	[Adsl - adenylosuccinate lyase, Atp5e - atp synthase, h+ transporting, mitochondrial f1 complex, epsilon subunit, Atp5l - atp synthase, h+ transporting, mitochondrial fo complex, subunit g, Adssl1 - adenylosuccinate synthase like 1, Atp5i - atp synthase, h+ transporting, mitochondrial fo complex, subunit e, Ampd1 - adenosine monophosphate deaminase 1, Aldoa - aldolase a, fructose-bisphosphate, At…
GO:0000272	polysaccharide catabolic process	0.000343	0.0312	10.84	17529	11	588	4	[Stbd1 - starch binding domain 1, Agl - amylo-alpha-1, 6-glucosidase, 4-alpha-glucanotransferase, Pygm - phosphorylase, glycogen, muscle, Pfkm - phosphofructokinase, muscle]
GO:0060297	regulation of sarcomere organization	0.000343	0.031	10.84	17529	11	588	4	[Ankrd23 - ankyrin repeat domain 23, Mef2c - myocyte enhancer factor 2c, Cav3 - caveolin 3, Prox1 - prospero homeobox 1]
GO:0019637	organophosphate metabolic process	0.000351	0.0315	1.79	17529	651	588	39	[Adsl - adenylosuccinate lyase, Idh3B - isocitrate dehydrogenase 3 (nad+) beta, Pla2g16 - phospholipase a2, group xvi, Atp5e - atp synthase, h+ transporting, mitochondrial f1 complex, epsilon subunit, Atp5l - atp synthase, h+ transporting, mitochondrial fo complex, subunit g, Ndufab1 - nadh dehydrogenase (ubiquinone) 1, alpha/beta subcomplex, 1, Adssl1 - adenylosuccinate synthase like 1, Atp5i - …
GO:0071822	protein complex subunit organization	0.000397	0.0354	1.6	17529	1026	588	55	[Adsl - adenylosuccinate lyase, Fgf13 - fibroblast growth factor 13, Acadm - acyl-coa dehydrogenase, c-4 to c-12 straight chain, Ndufs4 - nadh dehydrogenase (ubiquinone) fe-s protein 4, Mapt - microtubule-associated protein tau, Tcap - titin-cap, Grhpr - glyoxylate reductase/hydroxypyruvate reductase, Ndufab1 - nadh dehydrogenase (ubiquinone) 1, alpha/beta subcomplex, 1, Capn3 - calpain 3, Pde4di…
GO:0007015	actin filament organization	0.000404	0.0359	2.64	17529	181	588	16	[Cfl2 - cofilin 2, muscle, Acta1 - actin, alpha 1, skeletal muscle, Clrn1 - clarin 1, Myom2 - myomesin 2, Tcap - titin-cap, Tmod4 - tropomodulin 4, Mybph - myosin binding protein h, Cap2 - cap, adenylate cyclase-associated protein, 2 (yeast), Tpm2 - tropomyosin 2, beta, Pdlim3 - pdz and lim domain 3, Cav3 - caveolin 3, Lmod3 - leiomodin 3 (fetal), Prox1 - prospero homeobox 1, Tmod1 - tropomodulin…
GO:1901861	regulation of muscle tissue development	0.000405	0.0357	2.86	17529	146	588	14	[Myog - myogenin, Six1 - six homeobox 1, Rbfox1 - rna binding protein, fox-1 homolog (c. elegans) 1, Capn3 - calpain 3, Actn3 - actinin alpha 3, Myod1 - myogenic differentiation 1, Klhl41 - kelch-like family member 41, Mstn - myostatin, Mef2c - myocyte enhancer factor 2c, Cav3 - caveolin 3, Lmod3 - leiomodin 3 (fetal), Slc25a4 - solute carrier family 25 (mitochondrial carrier; adenine nucleotide …
GO:0006949	syncytium formation	0.000415	0.0364	5.96	17529	30	588	6	[Cacna1s - calcium channel, voltage-dependent, l type, alpha 1s subunit, Dyrk1b - dual-specificity tyrosine-(y)-phosphorylation regulated kinase 1b, Cav3 - caveolin 3, Pitx2 - paired-like homeodomain 2, Myod1 - myogenic differentiation 1, Ccng1 - cyclin g1]
GO:0007274	neuromuscular synaptic transmission	0.000415	0.0362	5.96	17529	30	588	6	[Mylk2 - myosin light chain kinase 2, Chrnd - cholinergic receptor, nicotinic, delta (muscle), Chrne - cholinergic receptor, nicotinic, epsilon (muscle), Chrnb1 - cholinergic receptor, nicotinic, beta 1 (muscle), Chrna1 - cholinergic receptor, nicotinic, alpha 1 (muscle), Stac3 - sh3 and cysteine rich domain 3]
GO:0009123	nucleoside monophosphate metabolic process	0.000424	0.0368	2.73	17529	164	588	15	[Adsl - adenylosuccinate lyase, Pgam2 - phosphoglycerate mutase 2 (muscle), Atp5e - atp synthase, h+ transporting, mitochondrial f1 complex, epsilon subunit, Tefm - transcription elongation factor, mitochondrial, Atp5l - atp synthase, h+ transporting, mitochondrial fo complex, subunit g, Adssl1 - adenylosuccinate synthase like 1, Atp5i - atp synthase, h+ transporting, mitochondrial fo complex, su…
GO:0007520	myoblast fusion	0.000426	0.0368	7.45	17529	20	588	5	[Cacna1s - calcium channel, voltage-dependent, l type, alpha 1s subunit, Cav3 - caveolin 3, Dyrk1b - dual-specificity tyrosine-(y)-phosphorylation regulated kinase 1b, Pitx2 - paired-like homeodomain 2, Myod1 - myogenic differentiation 1]
GO:0048634	regulation of muscle organ development	0.000434	0.0372	2.84	17529	147	588	14	[Myog - myogenin, Six1 - six homeobox 1, Rbfox1 - rna binding protein, fox-1 homolog (c. elegans) 1, Capn3 - calpain 3, Myod1 - myogenic differentiation 1, Actn3 - actinin alpha 3, Klhl41 - kelch-like family member 41, Mstn - myostatin, Mef2c - myocyte enhancer factor 2c, Lmod3 - leiomodin 3 (fetal), Cav3 - caveolin 3, Slc25a4 - solute carrier family 25 (mitochondrial carrier; adenine nucleotide …
GO:0002026	regulation of the force of heart contraction	0.0005	0.0427	5.77	17529	31	588	6	[Myh7 - myosin, heavy chain 7, cardiac muscle, beta, Myl2 - myosin, light chain 2, regulatory, cardiac, slow, Atp1a2 - atpase, na+/k+ transporting, alpha 2 polypeptide, Csrp3 - cysteine and glycine-rich protein 3 (cardiac lim protein), Myl3 - myosin, light chain 3, alkali; ventricular, skeletal, slow, Pln - phospholamban]
GO:0019395	fatty acid oxidation	0.000531	0.0451	3.83	17529	70	588	9	[Acadm - acyl-coa dehydrogenase, c-4 to c-12 straight chain, Phyh - phytanoyl-coa 2-hydroxylase, Acadl - acyl-coa dehydrogenase, long chain, Fabp3 - fatty acid binding protein 3, muscle and heart, Cpt2 - carnitine palmitoyltransferase 2, Cpt1b - carnitine palmitoyltransferase 1b, muscle, Cygb - cytoglobin, Etfa - electron-transfer-flavoprotein, alpha polypeptide, Auh - au rna binding protein/enoy…
GO:0051146	striated muscle cell differentiation	0.000531	0.0448	3.83	17529	70	588	9	[Trdn - triadin, Mef2c - myocyte enhancer factor 2c, Myog - myogenin, Acadm - acyl-coa dehydrogenase, c-4 to c-12 straight chain, Cav3 - caveolin 3, Myod1 - myogenic differentiation 1, Pitx2 - paired-like homeodomain 2, Klhl40 - kelch-like family member 40, Prox1 - prospero homeobox 1]
GO:0014854	response to inactivity	0.000544	0.0457	7.1	17529	21	588	5	[Casq1 - calsequestrin 1 (fast-twitch, skeletal muscle), Trim63 - tripartite motif containing 63, e3 ubiquitin protein ligase, Myog - myogenin, Sgca - sarcoglycan, alpha (dystrophin-associated glycoprotein), Actn3 - actinin alpha 3]
GO:0051186	cofactor metabolic process	0.00058	0.0484	2.02	17529	384	588	26	[Idh3B - isocitrate dehydrogenase 3 (nad+) beta, Coq10a - coenzyme q10 homolog a (s. cerevisiae), Ghr - growth hormone receptor, Sucla2 - succinate-coa ligase, adp-forming, beta subunit, Coq3 - coenzyme q3 homolog, methyltransferase (s. cerevisiae), Aldh1l1 - aldehyde dehydrogenase 1 family, member l1, Got1 - glutamic-oxaloacetic transaminase 1, soluble, Fmo2 - flavin containing monooxygenase 2, …
GO:0034440	lipid oxidation	0.00059	0.049	3.78	17529	71	588	9	[Acadm - acyl-coa dehydrogenase, c-4 to c-12 straight chain, Acadl - acyl-coa dehydrogenase, long chain, Phyh - phytanoyl-coa 2-hydroxylase, Fabp3 - fatty acid binding protein 3, muscle and heart, Cpt2 - carnitine palmitoyltransferase 2, Cpt1b - carnitine palmitoyltransferase 1b, muscle, Cygb - cytoglobin, Etfa - electron-transfer-flavoprotein, alpha polypeptide, Auh - au rna binding protein/enoy…
GO:0051262	protein tetramerization	0.000649	0.0536	2.73	17529	153	588	14	[Adsl - adenylosuccinate lyase, Acadm - acyl-coa dehydrogenase, c-4 to c-12 straight chain, Tp63 - tumor protein p63, Actn2 - actinin alpha 2, Pfkm - phosphofructokinase, muscle, Acot13 - acyl-coa thioesterase 13, Ache - acetylcholinesterase, Rxrg - retinoid x receptor gamma, Acadl - acyl-coa dehydrogenase, long chain, Aldoa - aldolase a, fructose-bisphosphate, Aldh1a1 - aldehyde dehydrogenase 1 …
GO:0002028	regulation of sodium ion transport	0.000656	0.0539	3.43	17529	87	588	10	[Wnk2 - wnk lysine deficient protein kinase 2, Scn4b - sodium channel, voltage-gated, type iv, beta, Scn1b - sodium channel, voltage-gated, type i, beta, Cav3 - caveolin 3, Fxyd1 - fxyd domain-containing ion transport regulator 1, Ptpn3 - protein tyrosine phosphatase, non-receptor type 3, Dmpk - dystrophia myotonica-protein kinase, Snta1 - syntrophin, alpha 1, Atp1a2 - atpase, na+/k+ transporting…
GO:1901739	regulation of myoblast fusion	0.000684	0.0559	6.78	17529	22	588	5	[Myog - myogenin, Myod1 - myogenic differentiation 1, Cxcl12 - chemokine (c-x-c motif) ligand 12, Cxcl9 - chemokine (c-x-c motif) ligand 9, Myf6 - myogenic factor 6]
GO:0098902	regulation of membrane depolarization during action potential	0.000696	0.0566	14.91	17529	6	588	3	[Cav3 - caveolin 3, Ptpn3 - protein tyrosine phosphatase, non-receptor type 3, Rangrf - ran guanine nucleotide release factor]
GO:1905709	negative regulation of membrane permeability	0.000696	0.0563	14.91	17529	6	588	3	[Bnip3 - bcl2/adenovirus e1b interacting protein 3, Slc25a4 - solute carrier family 25 (mitochondrial carrier; adenine nucleotide translocator), member 4, Nol3 - nucleolar protein 3 (apoptosis repressor with card domain)]
GO:0035795	negative regulation of mitochondrial membrane permeability	0.000696	0.056	14.91	17529	6	588	3	[Bnip3 - bcl2/adenovirus e1b interacting protein 3, Slc25a4 - solute carrier family 25 (mitochondrial carrier; adenine nucleotide translocator), member 4, Nol3 - nucleolar protein 3 (apoptosis repressor with card domain)]
GO:0006071	glycerol metabolic process	0.000704	0.0563	9.17	17529	13	588	4	[Coq2 - coenzyme q2 4-hydroxybenzoate polyprenyltransferase, Coq3 - coenzyme q3 homolog, methyltransferase (s. cerevisiae), Got1 - glutamic-oxaloacetic transaminase 1, soluble, Gpd2 - glycerol-3-phosphate dehydrogenase 2, mitochondrial]
GO:0055003	cardiac myofibril assembly	0.000704	0.056	9.17	17529	13	588	4	[Myl2 - myosin, light chain 2, regulatory, cardiac, slow, Tcap - titin-cap, Prox1 - prospero homeobox 1, Csrp3 - cysteine and glycine-rich protein 3 (cardiac lim protein)]
GO:0006754	ATP biosynthetic process	0.00071	0.0562	5.42	17529	33	588	6	[Atp5e - atp synthase, h+ transporting, mitochondrial f1 complex, epsilon subunit, Atp5l - atp synthase, h+ transporting, mitochondrial fo complex, subunit g, Atp5i - atp synthase, h+ transporting, mitochondrial fo complex, subunit e, Aldoa - aldolase a, fructose-bisphosphate, Atp5o - atp synthase, h+ transporting, mitochondrial f1 complex, o subunit, Atp5s - atp synthase, h+ transporting, mitoch…
GO:0051924	regulation of calcium ion transport	0.000732	0.0577	2.28	17529	248	588	19	[Dhrs7c - dehydrogenase/reductase (sdr family) member 7c, Rrad - ras-related associated with diabetes, Hrc - histidine rich calcium binding protein, Il16 - interleukin 16, Capn3 - calpain 3, Cxcl12 - chemokine (c-x-c motif) ligand 12, Atp1a2 - atpase, na+/k+ transporting, alpha 2 polypeptide, Casq1 - calsequestrin 1 (fast-twitch, skeletal muscle), Trdn - triadin, Cav3 - caveolin 3, Jsrp1 - juncti…
GO:0019362	pyridine nucleotide metabolic process	0.000786	0.0616	3.35	17529	89	588	10	[Idh3B - isocitrate dehydrogenase 3 (nad+) beta, Ldhb - lactate dehydrogenase b, Pgam2 - phosphoglycerate mutase 2 (muscle), Mpc2 - mitochondrial pyruvate carrier 2, Fmo2 - flavin containing monooxygenase 2, Pfkm - phosphofructokinase, muscle, Aldoa - aldolase a, fructose-bisphosphate, Gpd2 - glycerol-3-phosphate dehydrogenase 2, mitochondrial, Eno3 - enolase 3, beta, muscle, Gpd1 - glycerol-3-ph…
GO:0046496	nicotinamide nucleotide metabolic process	0.000786	0.0613	3.35	17529	89	588	10	[Idh3B - isocitrate dehydrogenase 3 (nad+) beta, Ldhb - lactate dehydrogenase b, Pgam2 - phosphoglycerate mutase 2 (muscle), Mpc2 - mitochondrial pyruvate carrier 2, Fmo2 - flavin containing monooxygenase 2, Pfkm - phosphofructokinase, muscle, Aldoa - aldolase a, fructose-bisphosphate, Gpd2 - glycerol-3-phosphate dehydrogenase 2, mitochondrial, Eno3 - enolase 3, beta, muscle, Gpd1 - glycerol-3-ph…
GO:0006732	coenzyme metabolic process	0.000846	0.0656	2.26	17529	251	588	19	[Coq2 - coenzyme q2 4-hydroxybenzoate polyprenyltransferase, Idh3B - isocitrate dehydrogenase 3 (nad+) beta, Coq10a - coenzyme q10 homolog a (s. cerevisiae), Ldhb - lactate dehydrogenase b, Pgam2 - phosphoglycerate mutase 2 (muscle), Acss1 - acyl-coa synthetase short-chain family member 1, Pfkm - phosphofructokinase, muscle, Sucla2 - succinate-coa ligase, adp-forming, beta subunit, Aldh1l1 - alde…
GO:0009124	nucleoside monophosphate biosynthetic process	0.000884	0.0683	3.58	17529	75	588	9	[Adsl - adenylosuccinate lyase, Atp5e - atp synthase, h+ transporting, mitochondrial f1 complex, epsilon subunit, Atp5l - atp synthase, h+ transporting, mitochondrial fo complex, subunit g, Adssl1 - adenylosuccinate synthase like 1, Atp5i - atp synthase, h+ transporting, mitochondrial fo complex, subunit e, Ampd1 - adenosine monophosphate deaminase 1, Aldoa - aldolase a, fructose-bisphosphate, At…
GO:0006744	ubiquinone biosynthetic process	0.000959	0.0737	8.52	17529	14	588	4	[Coq2 - coenzyme q2 4-hydroxybenzoate polyprenyltransferase, Coq10a - coenzyme q10 homolog a (s. cerevisiae), Coq3 - coenzyme q3 homolog, methyltransferase (s. cerevisiae), Pdss2 - prenyl (decaprenyl) diphosphate synthase, subunit 2]
GO:1901663	quinone biosynthetic process	0.000959	0.0733	8.52	17529	14	588	4	[Coq2 - coenzyme q2 4-hydroxybenzoate polyprenyltransferase, Coq10a - coenzyme q10 homolog a (s. cerevisiae), Coq3 - coenzyme q3 homolog, methyltransferase (s. cerevisiae), Pdss2 - prenyl (decaprenyl) diphosphate synthase, subunit 2]
GO:0014733	regulation of skeletal muscle adaptation	0.000959	0.0729	8.52	17529	14	588	4	[Myh7 - myosin, heavy chain 7, cardiac muscle, beta, Tnnt1 - troponin t type 1 (skeletal, slow), Actn3 - actinin alpha 3, Tnni1 - troponin i type 1 (skeletal, slow)]

## Sheet: K_vs_S.up_in_S.GOTERMS
GO Term	Description	P-value	FDR q-value	Enrichment	N	B	n	b	Genes
GO:0030198	extracellular matrix organization	1.01e-08	0.000152	7.09	15463	288	106	14	[IBSP - integrin-binding sialoprotein, JAM2 - junctional adhesion molecule 2, ICAM2 - intercellular adhesion molecule 2, HAPLN1 - hyaluronan and proteoglycan link protein 1, MMP13 - matrix metallopeptidase 13 (collagenase 3), CMA1 - chymase 1, mast cell, ADAMTSL2 - adamts-like 2, MMP9 - matrix metallopeptidase 9 (gelatinase b, 92kda gelatinase, 92kda type iv collagenase), DMP1 - dentin matrix aci…
GO:0043062	extracellular structure organization	1.05e-08	7.94e-05	7.07	15463	289	106	14	[IBSP - integrin-binding sialoprotein, JAM2 - junctional adhesion molecule 2, ICAM2 - intercellular adhesion molecule 2, HAPLN1 - hyaluronan and proteoglycan link protein 1, MMP13 - matrix metallopeptidase 13 (collagenase 3), CMA1 - chymase 1, mast cell, ADAMTSL2 - adamts-like 2, MMP9 - matrix metallopeptidase 9 (gelatinase b, 92kda gelatinase, 92kda type iv collagenase), DMP1 - dentin matrix aci…
GO:0001501	skeletal system development	1.01e-07	0.000507	9.47	15463	154	106	10	[MEPE - matrix extracellular phosphoglycoprotein, BGLAP - bone gamma-carboxyglutamate (gla) protein, FRZB - frizzled-related protein, PBX1 - pre-b-cell leukemia homeobox 1, TEAD4 - tea domain family member 4, TRPS1 - trichorhinophalangeal syndrome i, HAPLN1 - hyaluronan and proteoglycan link protein 1, COL11A2 - collagen, type xi, alpha 2, DLX5 - distal-less homeobox 5, MMP9 - matrix metallopepti…
GO:0031214	biomineral tissue development	8.27e-06	0.0312	12.5	15463	70	106	6	[MEPE - matrix extracellular phosphoglycoprotein, FGFR2 - fibroblast growth factor receptor 2, BGLAP - bone gamma-carboxyglutamate (gla) protein, DMP1 - dentin matrix acidic phosphoprotein 1, IBSP - integrin-binding sialoprotein, MMP13 - matrix metallopeptidase 13 (collagenase 3)]
GO:0048856	anatomical structure development	1.87e-05	0.0565	1.91	15463	2985	106	39	[FGFR2 - fibroblast growth factor receptor 2, IBSP - integrin-binding sialoprotein, PROX1 - prospero homeobox 1, HAPLN1 - hyaluronan and proteoglycan link protein 1, GFRA3 - gdnf family receptor alpha 3, SHROOM3 - shroom family member 3, CMA1 - chymase 1, mast cell, ADAMTSL2 - adamts-like 2, TMEFF1 - transmembrane protein with egf-like and two follistatin-like domains 1, FLT4 - fms-related tyrosi…
GO:0050793	regulation of developmental process	8.37e-05	0.211	2	15463	2266	106	31	[FGFR2 - fibroblast growth factor receptor 2, IQCB1 - iq motif containing b1, CASZ1 - castor zinc finger 1, PROX1 - prospero homeobox 1, SHROOM3 - shroom family member 3, CMA1 - chymase 1, mast cell, FLT4 - fms-related tyrosine kinase 4, SLIT2 - slit homolog 2 (drosophila), SYT17 - synaptotagmin xvii, CAMK2B - calcium/calmodulin-dependent protein kinase ii beta, PBX1 - pre-b-cell leukemia homeobo…
GO:0070848	response to growth factor	0.000105	0.226	4.83	15463	272	106	9	[FGFR2 - fibroblast growth factor receptor 2, MTSS1L - metastasis suppressor 1-like, EPHA2 - eph receptor a2, BGLAP - bone gamma-carboxyglutamate (gla) protein, TBC1D7 - tbc1 domain family, member 7, IBSP - integrin-binding sialoprotein, MEIS2 - meis homeobox 2, FLT4 - fms-related tyrosine kinase 4, DLX5 - distal-less homeobox 5]
GO:0044243	multicellular organismal catabolic process	0.000117	0.221	10.42	15463	70	106	5	[ACE - angiotensin i converting enzyme, MMP13 - matrix metallopeptidase 13 (collagenase 3), COL11A2 - collagen, type xi, alpha 2, MMP9 - matrix metallopeptidase 9 (gelatinase b, 92kda gelatinase, 92kda type iv collagenase), COL13A1 - collagen, type xiii, alpha 1]
GO:0030282	bone mineralization	0.000143	0.24	14.96	15463	39	106	4	[FGFR2 - fibroblast growth factor receptor 2, BGLAP - bone gamma-carboxyglutamate (gla) protein, IBSP - integrin-binding sialoprotein, MMP13 - matrix metallopeptidase 13 (collagenase 3)]
GO:0009888	tissue development	0.000246	0.372	3.34	15463	524	106	12	[FGFR2 - fibroblast growth factor receptor 2, MEPE - matrix extracellular phosphoglycoprotein, BGLAP - bone gamma-carboxyglutamate (gla) protein, DMP1 - dentin matrix acidic phosphoprotein 1, FRZB - frizzled-related protein, IBSP - integrin-binding sialoprotein, TNFRSF19 - tumor necrosis factor receptor superfamily, member 19, PROX1 - prospero homeobox 1, MMP13 - matrix metallopeptidase 13 (colla…
GO:0044259	multicellular organismal macromolecule metabolic process	0.000247	0.339	8.89	15463	82	106	5	[ACE - angiotensin i converting enzyme, MMP13 - matrix metallopeptidase 13 (collagenase 3), COL11A2 - collagen, type xi, alpha 2, MMP9 - matrix metallopeptidase 9 (gelatinase b, 92kda gelatinase, 92kda type iv collagenase), COL13A1 - collagen, type xiii, alpha 1]
GO:2000026	regulation of multicellular organismal development	0.000303	0.381	2.06	15463	1768	106	25	[FGFR2 - fibroblast growth factor receptor 2, CASZ1 - castor zinc finger 1, PROX1 - prospero homeobox 1, CMA1 - chymase 1, mast cell, SLIT2 - slit homolog 2 (drosophila), CAMK2B - calcium/calmodulin-dependent protein kinase ii beta, SYT17 - synaptotagmin xvii, PBX1 - pre-b-cell leukemia homeobox 1, FRZB - frizzled-related protein, ACE - angiotensin i converting enzyme, TRPS1 - trichorhinophalange…
GO:0032502	developmental process	0.000356	0.414	1.56	15463	4409	106	47	[FGFR2 - fibroblast growth factor receptor 2, IBSP - integrin-binding sialoprotein, PROX1 - prospero homeobox 1, HAPLN1 - hyaluronan and proteoglycan link protein 1, GFRA3 - gdnf family receptor alpha 3, SHROOM3 - shroom family member 3, CMA1 - chymase 1, mast cell, ADAMTSL2 - adamts-like 2, TMEFF1 - transmembrane protein with egf-like and two follistatin-like domains 1, FLT4 - fms-related tyrosi…
GO:0070309	lens fiber cell morphogenesis	0.000459	0.496	58.35	15463	5	106	2	[EPHA2 - eph receptor a2, PROX1 - prospero homeobox 1]
GO:0048731	system development	0.00054	0.544	2.89	15463	656	106	13	[MEPE - matrix extracellular phosphoglycoprotein, BGLAP - bone gamma-carboxyglutamate (gla) protein, GFRA3 - gdnf family receptor alpha 3, HAPLN1 - hyaluronan and proteoglycan link protein 1, FLT4 - fms-related tyrosine kinase 4, MMP9 - matrix metallopeptidase 9 (gelatinase b, 92kda gelatinase, 92kda type iv collagenase), DLX5 - distal-less homeobox 5, FRZB - frizzled-related protein, PBX1 - pre-…
GO:0001763	morphogenesis of a branching structure	0.00058	0.547	5.84	15463	150	106	6	[FGFR2 - fibroblast growth factor receptor 2, EPHA2 - eph receptor a2, PBX1 - pre-b-cell leukemia homeobox 1, PROX1 - prospero homeobox 1, SLIT2 - slit homolog 2 (drosophila), COL13A1 - collagen, type xiii, alpha 1]
GO:0048863	stem cell differentiation	0.000583	0.518	10.42	15463	56	106	4	[FGFR2 - fibroblast growth factor receptor 2, FRZB - frizzled-related protein, ACE - angiotensin i converting enzyme, SP7 - sp7 transcription factor]
GO:0001649	osteoblast differentiation	0.000619	0.519	7.29	15463	100	106	5	[EPHA2 - eph receptor a2, BGLAP - bone gamma-carboxyglutamate (gla) protein, IBSP - integrin-binding sialoprotein, DLX5 - distal-less homeobox 5, SP7 - sp7 transcription factor]
GO:0001958	endochondral ossification	0.000645	0.513	17.51	15463	25	106	3	[MMP13 - matrix metallopeptidase 13 (collagenase 3), DLX5 - distal-less homeobox 5, COL13A1 - collagen, type xiii, alpha 1]
GO:0036075	replacement ossification	0.000645	0.488	17.51	15463	25	106	3	[MMP13 - matrix metallopeptidase 13 (collagenase 3), DLX5 - distal-less homeobox 5, COL13A1 - collagen, type xiii, alpha 1]
GO:0051239	regulation of multicellular organismal process	0.000646	0.465	1.76	15463	2652	106	32	[FGFR2 - fibroblast growth factor receptor 2, CASZ1 - castor zinc finger 1, PROX1 - prospero homeobox 1, CMA1 - chymase 1, mast cell, FLT4 - fms-related tyrosine kinase 4, SLIT2 - slit homolog 2 (drosophila), APOC1 - apolipoprotein c-i, SYT17 - synaptotagmin xvii, CAMK2B - calcium/calmodulin-dependent protein kinase ii beta, PBX1 - pre-b-cell leukemia homeobox 1, FRZB - frizzled-related protein, …
GO:0044236	multicellular organism metabolic process	0.000677	0.465	7.15	15463	102	106	5	[ACE - angiotensin i converting enzyme, MMP13 - matrix metallopeptidase 13 (collagenase 3), COL11A2 - collagen, type xi, alpha 2, MMP9 - matrix metallopeptidase 9 (gelatinase b, 92kda gelatinase, 92kda type iv collagenase), COL13A1 - collagen, type xiii, alpha 1]
GO:0030574	collagen catabolic process	0.000857	0.563	9.41	15463	62	106	4	[MMP13 - matrix metallopeptidase 13 (collagenase 3), COL11A2 - collagen, type xi, alpha 2, MMP9 - matrix metallopeptidase 9 (gelatinase b, 92kda gelatinase, 92kda type iv collagenase), COL13A1 - collagen, type xiii, alpha 1]
GO:0060349	bone morphogenesis	0.000905	0.57	15.63	15463	28	106	3	[FGFR2 - fibroblast growth factor receptor 2, MMP13 - matrix metallopeptidase 13 (collagenase 3), ACP5 - acid phosphatase 5, tartrate resistant]
GO:0050679	positive regulation of epithelial cell proliferation	0.000954	0.577	5.3	15463	165	106	6	[FGFR2 - fibroblast growth factor receptor 2, PROX1 - prospero homeobox 1, NR4A3 - nuclear receptor subfamily 4, group a, member 3, SCN5A - sodium channel, voltage-gated, type v, alpha subunit, FLT4 - fms-related tyrosine kinase 4, DLX5 - distal-less homeobox 5]
GO:0001945	lymph vessel development	0.000956	0.556	41.68	15463	7	106	2	[FLT4 - fms-related tyrosine kinase 4, TMEM204 - transmembrane protein 204]
GO:0003416	endochondral bone growth	0.000956	0.535	41.68	15463	7	106	2	[FGFR2 - fibroblast growth factor receptor 2, OSTN - osteocrin]

## Sheet: K_vs_S.down_in_S.GOTERMS
GO Term	Description	P-value	FDR q-value	Enrichment	N	B	n	b	Genes
GO:1903047	mitotic cell cycle process	1.13e-14	1.72e-10	5.72	17529	380	242	30	[Mybl2 - myeloblastosis oncogene-like 2, Plk1 - polo-like kinase 1, Tcf19 - transcription factor 19, Ncapd2 - non-smc condensin i complex, subunit d2, Eml1 - echinoderm microtubule associated protein like 1, Cdt1 - chromatin licensing and dna replication factor 1, Pttg1 - pituitary tumor-transforming 1, Ccna2 - cyclin a2, Cenpe - centromere protein e, Top2a - topoisomerase (dna) ii alpha, Kif2c -…
GO:0022402	cell cycle process	2.95e-14	2.25e-10	4.28	17529	643	242	38	[Fancd2 - fanconi anemia, complementation group d2, Mybl2 - myeloblastosis oncogene-like 2, Plk1 - polo-like kinase 1, Tcf19 - transcription factor 19, Ncapd2 - non-smc condensin i complex, subunit d2, Ccne2 - cyclin e2, Eml1 - echinoderm microtubule associated protein like 1, Cdt1 - chromatin licensing and dna replication factor 1, Pttg1 - pituitary tumor-transforming 1, Tubb1 - tubulin, beta 1 …
GO:0007059	chromosome segregation	7.45e-13	3.8e-09	12.63	17529	86	242	15	[Plk1 - polo-like kinase 1, Brca1 - breast cancer 1, early onset, Mis18a - mis18 kinetochore protein homolog a (s. pombe), Smc4 - structural maintenance of chromosomes 4, Birc5 - baculoviral iap repeat-containing 5, Cenpf - centromere protein f, Cdt1 - chromatin licensing and dna replication factor 1, Pttg1 - pituitary tumor-transforming 1, Nusap1 - nucleolar and spindle associated protein 1, Esp…
GO:0006779	porphyrin-containing compound biosynthetic process	6.68e-12	2.55e-08	29.63	17529	22	242	9	[Cpox - coproporphyrinogen oxidase, Hmbs - hydroxymethylbilane synthase, Alad - aminolevulinate dehydratase, Ank1 - ankyrin 1, erythrocytic, Fech - ferrochelatase, Spta1 - spectrin, alpha, erythrocytic 1 (elliptocytosis 2), Slc25a39 - solute carrier family 25, member 39, Slc25a38 - solute carrier family 25, member 38, Sptb - spectrin, beta, erythrocytic]
GO:0006778	porphyrin-containing compound metabolic process	1.03e-11	3.16e-08	22.64	17529	32	242	10	[Eif2ak1 - eukaryotic translation initiation factor 2 alpha kinase 1, Cpox - coproporphyrinogen oxidase, Hmbs - hydroxymethylbilane synthase, Alad - aminolevulinate dehydratase, Ank1 - ankyrin 1, erythrocytic, Spta1 - spectrin, alpha, erythrocytic 1 (elliptocytosis 2), Fech - ferrochelatase, Slc25a39 - solute carrier family 25, member 39, Slc25a38 - solute carrier family 25, member 38, Sptb - spe…
GO:0033014	tetrapyrrole biosynthetic process	1.08e-11	2.76e-08	28.34	17529	23	242	9	[Cpox - coproporphyrinogen oxidase, Hmbs - hydroxymethylbilane synthase, Alad - aminolevulinate dehydratase, Ank1 - ankyrin 1, erythrocytic, Spta1 - spectrin, alpha, erythrocytic 1 (elliptocytosis 2), Fech - ferrochelatase, Slc25a39 - solute carrier family 25, member 39, Slc25a38 - solute carrier family 25, member 38, Sptb - spectrin, beta, erythrocytic]
GO:0033013	tetrapyrrole metabolic process	1.23e-10	2.69e-07	18.11	17529	40	242	10	[Eif2ak1 - eukaryotic translation initiation factor 2 alpha kinase 1, Cpox - coproporphyrinogen oxidase, Hmbs - hydroxymethylbilane synthase, Alad - aminolevulinate dehydratase, Ank1 - ankyrin 1, erythrocytic, Spta1 - spectrin, alpha, erythrocytic 1 (elliptocytosis 2), Fech - ferrochelatase, Slc25a39 - solute carrier family 25, member 39, Slc25a38 - solute carrier family 25, member 38, Sptb - spe…
GO:0051276	chromosome organization	2.32e-10	4.43e-07	5.55	17529	274	242	21	[Fancd2 - fanconi anemia, complementation group d2, Mcm6 - minichromosome maintenance complex component 6, Brip1 - brca1 interacting protein c-terminal helicase 1, Zfpm1 - zinc finger protein, multitype 1, Gins1 - gins complex subunit 1 (psf1 homolog), Plk1 - polo-like kinase 1, Rad54l - rad54 like (s. cerevisiae), Ncapd2 - non-smc condensin i complex, subunit d2, Smc4 - structural maintenance of…
GO:0048821	erythrocyte development	3.18e-10	5.4e-07	26.34	17529	22	242	8	[Bpgm - 2,3-bisphosphoglycerate mutase, Rhd - rh blood group, d antigen, Dmtn - dematin actin binding protein, Klf1 - kruppel-like factor 1 (erythroid), Ank1 - ankyrin 1, erythrocytic, Hba1 - hemoglobin, alpha 1, Rhag - rh-associated glycoprotein, Hbb - hemoglobin, beta]
GO:0000278	mitotic cell cycle	3.54e-10	5.42e-07	10.35	17529	91	242	13	[Rrm2 - ribonucleotide reductase m2, Tfdp2 - transcription factor dp-2 (e2f dimerization partner 2), Plk1 - polo-like kinase 1, Cdc6 - cell division cycle 6, Cdc25b - cell division cycle 25b, Cenpf - centromere protein f, Cdt1 - chromatin licensing and dna replication factor 1, Ccnb1 - cyclin b1, E2f8 - e2f transcription factor 8, Ppp2r2b - protein phosphatase 2, regulatory subunit b, beta, Kif18…
GO:0051301	cell division	4.53e-10	6.3e-07	6.01	17529	229	242	19	[Brip1 - brca1 interacting protein c-terminal helicase 1, Cdca3 - cell division cycle associated 3, Mis18a - mis18 kinetochore protein homolog a (s. pombe), Ncapd2 - non-smc condensin i complex, subunit d2, Cdc6 - cell division cycle 6, Cdc25b - cell division cycle 25b, Ccne1 - cyclin e1, Birc5 - baculoviral iap repeat-containing 5, Cdt1 - chromatin licensing and dna replication factor 1, Pttg1 -…
GO:0098813	nuclear chromosome segregation	4.54e-10	5.78e-07	19.75	17529	33	242	9	[Smc4 - structural maintenance of chromosomes 4, Pttg1 - pituitary tumor-transforming 1, Nusap1 - nucleolar and spindle associated protein 1, Plk1 - polo-like kinase 1, Espl1 - extra spindle pole bodies homolog 1 (s. cerevisiae), Kif18b - kinesin family member 18b, Top2a - topoisomerase (dna) ii alpha, Knstrn - kinetochore-localized astrin/spag5 binding protein, Spag5 - sperm associated antigen 5]
GO:0061515	myeloid cell development	6.91e-10	8.13e-07	15.41	17529	47	242	10	[Bpgm - 2,3-bisphosphoglycerate mutase, Rhd - rh blood group, d antigen, Dmtn - dematin actin binding protein, Klf1 - kruppel-like factor 1 (erythroid), Zfpm1 - zinc finger protein, multitype 1, Tal1 - t-cell acute lymphocytic leukemia 1, Ank1 - ankyrin 1, erythrocytic, Hba1 - hemoglobin, alpha 1, Rhag - rh-associated glycoprotein, Hbb - hemoglobin, beta]
GO:0051983	regulation of chromosome segregation	1.49e-09	1.62e-06	10.47	17529	83	242	12	[Fen1 - flap structure-specific endonuclease 1, Cdt1 - chromatin licensing and dna replication factor 1, Pttg1 - pituitary tumor-transforming 1, Ccnb1 - cyclin b1, Racgap1 - rac gtpase-activating protein 1, Plk1 - polo-like kinase 1, Mki67 - antigen identified by monoclonal antibody ki-67, Cenpe - centromere protein e, Kif2c - kinesin family member 2c, Cdc6 - cell division cycle 6, Knstrn - kinet…
GO:0006996	organelle organization	1.5e-09	1.53e-06	2.29	17529	1802	242	57	[Fancd2 - fanconi anemia, complementation group d2, Mybl2 - myeloblastosis oncogene-like 2, Plk1 - polo-like kinase 1, Add2 - adducin 2 (beta), Cdt1 - chromatin licensing and dna replication factor 1, Mx1 - myxovirus (influenza virus) resistance 1, Pttg1 - pituitary tumor-transforming 1, Dyrk3 - dual-specificity tyrosine-(y)-phosphorylation regulated kinase 3, Kif2c - kinesin family member 2c, Sp…
GO:0007051	spindle organization	1.51e-09	1.44e-06	9.23	17529	102	242	13	[Mybl2 - myeloblastosis oncogene-like 2, Fbxo5 - f-box protein 5, Haus4 - haus augmin-like complex, subunit 4, Tpx2 - tpx2, microtubule-associated, Birc5 - baculoviral iap repeat-containing 5, Eml1 - echinoderm microtubule associated protein like 1, Ccnb1 - cyclin b1, Haus8 - haus augmin-like complex, subunit 8, Tubb1 - tubulin, beta 1 class vi, Cenpe - centromere protein e, Espl1 - extra spindle…
GO:0007049	cell cycle	8.74e-09	7.86e-06	7.24	17529	140	242	14	[Rrm2 - ribonucleotide reductase m2, Tfdp2 - transcription factor dp-2 (e2f dimerization partner 2), Plk1 - polo-like kinase 1, Mki67 - antigen identified by monoclonal antibody ki-67, Cdc6 - cell division cycle 6, Cdc25b - cell division cycle 25b, Cenpf - centromere protein f, Cdt1 - chromatin licensing and dna replication factor 1, Ccnb1 - cyclin b1, E2f8 - e2f transcription factor 8, Ppp2r2b -…
GO:0000819	sister chromatid segregation	2.48e-08	2.11e-05	21.13	17529	24	242	7	[Nusap1 - nucleolar and spindle associated protein 1, Plk1 - polo-like kinase 1, Espl1 - extra spindle pole bodies homolog 1 (s. cerevisiae), Kif18b - kinesin family member 18b, Top2a - topoisomerase (dna) ii alpha, Spag5 - sperm associated antigen 5, Knstrn - kinetochore-localized astrin/spag5 binding protein]
GO:0006270	DNA replication initiation	2.48e-08	2e-05	21.13	17529	24	242	7	[Ccne1 - cyclin e1, Mcm6 - minichromosome maintenance complex component 6, Ccne2 - cyclin e2, Mcm5 - minichromosome maintenance complex component 5, Mcm10 - minichromosome maintenance complex component 10, Mcm3 - minichromosome maintenance complex component 3, Cdc6 - cell division cycle 6]
GO:0051597	response to methylmercury	2.94e-08	2.24e-05	28.97	17529	15	242	6	[Ccne1 - cyclin e1, Cpox - coproporphyrinogen oxidase, Hmbs - hydroxymethylbilane synthase, Alad - aminolevulinate dehydratase, Fech - ferrochelatase, Arg1 - arginase, liver]
GO:0006783	heme biosynthetic process	4.64e-08	3.38e-05	27.16	17529	16	242	6	[Cpox - coproporphyrinogen oxidase, Hmbs - hydroxymethylbilane synthase, Alad - aminolevulinate dehydratase, Fech - ferrochelatase, Slc25a39 - solute carrier family 25, member 39, Slc25a38 - solute carrier family 25, member 38]
GO:0007010	cytoskeleton organization	6.54e-08	4.54e-05	3.1	17529	677	242	29	[Mybl2 - myeloblastosis oncogene-like 2, Plk1 - polo-like kinase 1, Add2 - adducin 2 (beta), Eml1 - echinoderm microtubule associated protein like 1, Krt76 - keratin 76, Tubb1 - tubulin, beta 1 class vi, Cenpe - centromere protein e, Coro2b - coronin, actin binding protein, 2b, Kif2c - kinesin family member 2c, Spag5 - sperm associated antigen 5, Fbxo5 - f-box protein 5, Haus4 - haus augmin-like …
GO:0000226	microtubule cytoskeleton organization	8.38e-08	5.57e-05	4.61	17529	283	242	18	[Mybl2 - myeloblastosis oncogene-like 2, Fbxo5 - f-box protein 5, Haus4 - haus augmin-like complex, subunit 4, Plk1 - polo-like kinase 1, Tpx2 - tpx2, microtubule-associated, Eml1 - echinoderm microtubule associated protein like 1, Birc5 - baculoviral iap repeat-containing 5, Ccnb1 - cyclin b1, Nusap1 - nucleolar and spindle associated protein 1, Haus8 - haus augmin-like complex, subunit 8, Prc1 …
GO:0046501	protoporphyrinogen IX metabolic process	1.15e-07	7.3e-05	36.22	17529	10	242	5	[Eif2ak1 - eukaryotic translation initiation factor 2 alpha kinase 1, Cpox - coproporphyrinogen oxidase, Hmbs - hydroxymethylbilane synthase, Alad - aminolevulinate dehydratase, Fech - ferrochelatase]
GO:0010564	regulation of cell cycle process	1.37e-07	8.39e-05	3.46	17529	503	242	24	[Fen1 - flap structure-specific endonuclease 1, Plk4 - polo-like kinase 4, Fbxo5 - f-box protein 5, Orc1 - origin recognition complex, subunit 1, Pim1 - pim-1 oncogene, Racgap1 - rac gtpase-activating protein 1, Plk1 - polo-like kinase 1, Brca1 - breast cancer 1, early onset, Mki67 - antigen identified by monoclonal antibody ki-67, Cdc6 - cell division cycle 6, Tpx2 - tpx2, microtubule-associated…
GO:0051726	regulation of cell cycle	1.82e-07	0.000107	2.71	17529	882	242	33	[Fen1 - flap structure-specific endonuclease 1, Asns - asparagine synthetase (glutamine-hydrolyzing), Orc1 - origin recognition complex, subunit 1, Plk1 - polo-like kinase 1, Cdkl1 - cyclin-dependent kinase-like 1 (cdc2-related kinase), Cdc6 - cell division cycle 6, Ccne2 - cyclin e2, E2f2 - e2f transcription factor 2, Cdt1 - chromatin licensing and dna replication factor 1, Pttg1 - pituitary tum…
GO:0016043	cellular component organization	2.87e-07	0.000163	1.61	17529	4128	242	92	[Fancd2 - fanconi anemia, complementation group d2, Alox15 - arachidonate 15-lipoxygenase, Rrm2 - ribonucleotide reductase m2, Mybl2 - myeloblastosis oncogene-like 2, Alad - aminolevulinate dehydratase, Plk1 - polo-like kinase 1, Ago2 - argonaute risc catalytic component 2, Add2 - adducin 2 (beta), Cdt1 - chromatin licensing and dna replication factor 1, Mx1 - myxovirus (influenza virus) resistan…
GO:0090068	positive regulation of cell cycle process	3.18e-07	0.000174	5.05	17529	215	242	15	[Fen1 - flap structure-specific endonuclease 1, Plk4 - polo-like kinase 4, Orc1 - origin recognition complex, subunit 1, Racgap1 - rac gtpase-activating protein 1, Brca1 - breast cancer 1, early onset, Cdc6 - cell division cycle 6, Cdc25b - cell division cycle 25b, Birc5 - baculoviral iap repeat-containing 5, Cdt1 - chromatin licensing and dna replication factor 1, Ccnb1 - cyclin b1, Nusap1 - nuc…
GO:0006259	DNA metabolic process	3.64e-07	0.000192	3.18	17529	570	242	25	[Fancd2 - fanconi anemia, complementation group d2, Fen1 - flap structure-specific endonuclease 1, Rrm2 - ribonucleotide reductase m2, Orc1 - origin recognition complex, subunit 1, Mcm3 - minichromosome maintenance complex component 3, Cdc6 - cell division cycle 6, Helq - helicase, polq-like, Ccne2 - cyclin e2, Cdt1 - chromatin licensing and dna replication factor 1, Pttg1 - pituitary tumor-trans…
GO:0000070	mitotic sister chromatid segregation	4.04e-07	0.000206	19.75	17529	22	242	6	[Nusap1 - nucleolar and spindle associated protein 1, Plk1 - polo-like kinase 1, Kif18b - kinesin family member 18b, Espl1 - extra spindle pole bodies homolog 1 (s. cerevisiae), Knstrn - kinetochore-localized astrin/spag5 binding protein, Spag5 - sperm associated antigen 5]
GO:0046148	pigment biosynthetic process	4.24e-07	0.000209	14.49	17529	35	242	7	[Cpox - coproporphyrinogen oxidase, Hmbs - hydroxymethylbilane synthase, Alad - aminolevulinate dehydratase, LOC314140 - ribose-phosphate pyrophosphokinase i -like, Fech - ferrochelatase, Slc25a39 - solute carrier family 25, member 39, Slc25a38 - solute carrier family 25, member 38]
GO:0071103	DNA conformation change	5.04e-07	0.000241	7.96	17529	91	242	10	[Smc4 - structural maintenance of chromosomes 4, Mcm6 - minichromosome maintenance complex component 6, Brip1 - brca1 interacting protein c-terminal helicase 1, Nusap1 - nucleolar and spindle associated protein 1, Gins1 - gins complex subunit 1 (psf1 homolog), Mcm5 - minichromosome maintenance complex component 5, Rad54l - rad54 like (s. cerevisiae), Top2a - topoisomerase (dna) ii alpha, Blm - bl…
GO:0045787	positive regulation of cell cycle	5.19e-07	0.000241	4.07	17529	320	242	18	[Fen1 - flap structure-specific endonuclease 1, Plk4 - polo-like kinase 4, Asns - asparagine synthetase (glutamine-hydrolyzing), Orc1 - origin recognition complex, subunit 1, Pim1 - pim-1 oncogene, Racgap1 - rac gtpase-activating protein 1, Brca1 - breast cancer 1, early onset, Cdc6 - cell division cycle 6, Cdc25b - cell division cycle 25b, Birc5 - baculoviral iap repeat-containing 5, Cdt1 - chro…
GO:0071840	cellular component organization or biogenesis	5.26e-07	0.000237	1.59	17529	4181	242	92	[Fancd2 - fanconi anemia, complementation group d2, Alox15 - arachidonate 15-lipoxygenase, Rrm2 - ribonucleotide reductase m2, Mybl2 - myeloblastosis oncogene-like 2, Alad - aminolevulinate dehydratase, Plk1 - polo-like kinase 1, Ago2 - argonaute risc catalytic component 2, Add2 - adducin 2 (beta), Cdt1 - chromatin licensing and dna replication factor 1, Mx1 - myxovirus (influenza virus) resistan…
GO:0042168	heme metabolic process	5.4e-07	0.000236	18.9	17529	23	242	6	[Cpox - coproporphyrinogen oxidase, Hmbs - hydroxymethylbilane synthase, Alad - aminolevulinate dehydratase, Fech - ferrochelatase, Slc25a39 - solute carrier family 25, member 39, Slc25a38 - solute carrier family 25, member 38]
GO:0051988	regulation of attachment of spindle microtubules to kinetochore	5.66e-07	0.00024	27.86	17529	13	242	5	[Ccnb1 - cyclin b1, Racgap1 - rac gtpase-activating protein 1, Cenpe - centromere protein e, Spag5 - sperm associated antigen 5, Knstrn - kinetochore-localized astrin/spag5 binding protein]
GO:0055076	transition metal ion homeostasis	1.34e-06	0.000552	7.17	17529	101	242	10	[Eif2ak1 - eukaryotic translation initiation factor 2 alpha kinase 1, Rhd - rh blood group, d antigen, Tmc8 - transmembrane channel-like 8, Epb42 - erythrocyte membrane protein band 4.2, Tfr2 - transferrin receptor 2, Ank1 - ankyrin 1, erythrocytic, Tfrc - transferrin receptor, Fech - ferrochelatase, Rhag - rh-associated glycoprotein, Atp7b - atpase, cu++ transporting, beta polypeptide]
GO:0007017	microtubule-based process	1.86e-06	0.000749	3.18	17529	501	242	22	[Plk4 - polo-like kinase 4, Mybl2 - myeloblastosis oncogene-like 2, Fbxo5 - f-box protein 5, Haus4 - haus augmin-like complex, subunit 4, Racgap1 - rac gtpase-activating protein 1, Plk1 - polo-like kinase 1, Brca1 - breast cancer 1, early onset, Tpx2 - tpx2, microtubule-associated, Kif4a - kinesin family member 4a, Birc5 - baculoviral iap repeat-containing 5, Eml1 - echinoderm microtubule associa…
GO:0010999	regulation of eIF2 alpha phosphorylation by heme	2.6e-06	0.00102	72.43	17529	3	242	3	[Eif2ak1 - eukaryotic translation initiation factor 2 alpha kinase 1, Fech - ferrochelatase, Hbb - hemoglobin, beta]
GO:0007346	regulation of mitotic cell cycle	2.63e-06	0.001	3.22	17529	472	242	21	[Asns - asparagine synthetase (glutamine-hydrolyzing), Fbxo5 - f-box protein 5, Pim1 - pim-1 oncogene, Plk1 - polo-like kinase 1, Brca1 - breast cancer 1, early onset, Mki67 - antigen identified by monoclonal antibody ki-67, Cdc6 - cell division cycle 6, Tpx2 - tpx2, microtubule-associated, Cdc25b - cell division cycle 25b, Birc5 - baculoviral iap repeat-containing 5, Cenpf - centromere protein f…
GO:0042440	pigment metabolic process	3.44e-06	0.00128	10.79	17529	47	242	7	[Cpox - coproporphyrinogen oxidase, Hmbs - hydroxymethylbilane synthase, Alad - aminolevulinate dehydratase, LOC314140 - ribose-phosphate pyrophosphokinase i -like, Fech - ferrochelatase, Slc25a39 - solute carrier family 25, member 39, Slc25a38 - solute carrier family 25, member 38]
GO:0055072	iron ion homeostasis	4.76e-06	0.00173	8.4	17529	69	242	8	[Eif2ak1 - eukaryotic translation initiation factor 2 alpha kinase 1, Rhd - rh blood group, d antigen, Epb42 - erythrocyte membrane protein band 4.2, Tfr2 - transferrin receptor 2, Ank1 - ankyrin 1, erythrocytic, Tfrc - transferrin receptor, Fech - ferrochelatase, Rhag - rh-associated glycoprotein]
GO:0015804	neutral amino acid transport	5.27e-06	0.00188	13.17	17529	33	242	6	[Slc6a9 - solute carrier family 6 (neurotransmitter transporter, glycine), member 9, Slc43a1 - solute carrier family 43 (amino acid system l transporter), member 1, Slc38a5 - solute carrier family 38, member 5, Slc7a5 - solute carrier family 7 (amino acid transporter light chain, l system), member 5, Slc25a38 - solute carrier family 25, member 38, Slc1a5 - solute carrier family 1 (neutral amino a…
GO:1903046	meiotic cell cycle process	5.51e-06	0.00191	5.49	17529	145	242	11	[Fancd2 - fanconi anemia, complementation group d2, Smc4 - structural maintenance of chromosomes 4, Brip1 - brca1 interacting protein c-terminal helicase 1, Ccne1 - cyclin e1, Cdc25b - cell division cycle 25b, Ccne2 - cyclin e2, Pttg1 - pituitary tumor-transforming 1, Fbxo5 - f-box protein 5, Plk1 - polo-like kinase 1, Espl1 - extra spindle pole bodies homolog 1 (s. cerevisiae), Top2a - topoisome…
GO:0051186	cofactor metabolic process	6.86e-06	0.00233	3.4	17529	384	242	18	[Cpox - coproporphyrinogen oxidase, Pck2 - phosphoenolpyruvate carboxykinase 2 (mitochondrial), Hmbs - hydroxymethylbilane synthase, Alad - aminolevulinate dehydratase, Pklr - pyruvate kinase, liver and rbc, Ank1 - ankyrin 1, erythrocytic, Hba1 - hemoglobin, alpha 1, Bpgm - 2,3-bisphosphoglycerate mutase, Eif2ak1 - eukaryotic translation initiation factor 2 alpha kinase 1, Gclm - glutamate cystei…
GO:0019755	one-carbon compound transport	6.97e-06	0.00232	28.97	17529	10	242	4	[Aqp3 - aquaporin 3, Car2 - carbonic anhydrase 2, Slc14a1 - solute carrier family 14 (urea transporter), member 1, Rhag - rh-associated glycoprotein]
GO:0030218	erythrocyte differentiation	7.87e-06	0.00256	9.57	17529	53	242	7	[Klf1 - kruppel-like factor 1 (erythroid), Zfpm1 - zinc finger protein, multitype 1, Tal1 - t-cell acute lymphocytic leukemia 1, Dyrk3 - dual-specificity tyrosine-(y)-phosphorylation regulated kinase 3, Ahsp - alpha hemoglobin stabilizing protein, Fech - ferrochelatase, Slc25a38 - solute carrier family 25, member 38]
GO:0051984	positive regulation of chromosome segregation	8.17e-06	0.0026	17.25	17529	21	242	5	[Fen1 - flap structure-specific endonuclease 1, Cdt1 - chromatin licensing and dna replication factor 1, Ccnb1 - cyclin b1, Cenpe - centromere protein e, Cdc6 - cell division cycle 6]
GO:0010035	response to inorganic substance	9.66e-06	0.00301	2.71	17529	641	242	24	[Cpox - coproporphyrinogen oxidase, Alox15 - arachidonate 15-lipoxygenase, Hmbs - hydroxymethylbilane synthase, Alad - aminolevulinate dehydratase, Pklr - pyruvate kinase, liver and rbc, Hba1 - hemoglobin, alpha 1, Car2 - carbonic anhydrase 2, Atp7b - atpase, cu++ transporting, beta polypeptide, Slc30a10 - solute carrier family 30, member 10, Cdh1 - cadherin 1, Dmtn - dematin actin binding protei…
GO:0051225	spindle assembly	1.01e-05	0.00309	9.22	17529	55	242	7	[Birc5 - baculoviral iap repeat-containing 5, Mybl2 - myeloblastosis oncogene-like 2, Fbxo5 - f-box protein 5, Haus4 - haus augmin-like complex, subunit 4, Haus8 - haus augmin-like complex, subunit 8, Tubb1 - tubulin, beta 1 class vi, Tpx2 - tpx2, microtubule-associated]
GO:0045143	homologous chromosome segregation	1.03e-05	0.00308	54.33	17529	4	242	3	[Pttg1 - pituitary tumor-transforming 1, Plk1 - polo-like kinase 1, Espl1 - extra spindle pole bodies homolog 1 (s. cerevisiae)]
GO:0051188	cofactor biosynthetic process	1.04e-05	0.00307	5.14	17529	155	242	11	[Cpox - coproporphyrinogen oxidase, Hmbs - hydroxymethylbilane synthase, Gclm - glutamate cysteine ligase, modifier subunit, Alad - aminolevulinate dehydratase, Tst - thiosulfate sulfurtransferase, Ank1 - ankyrin 1, erythrocytic, Fech - ferrochelatase, Spta1 - spectrin, alpha, erythrocytic 1 (elliptocytosis 2), Slc25a39 - solute carrier family 25, member 39, Slc25a38 - solute carrier family 25, m…
GO:0071241	cellular response to inorganic substance	1.05e-05	0.00302	4.34	17529	217	242	13	[Alox15 - arachidonate 15-lipoxygenase, Hmbs - hydroxymethylbilane synthase, Alad - aminolevulinate dehydratase, Atp7b - atpase, cu++ transporting, beta polypeptide, Cdh1 - cadherin 1, Dmtn - dematin actin binding protein, Ccnb1 - cyclin b1, Gsn - gelsolin, Tfr2 - transferrin receptor 2, Ccna2 - cyclin a2, Blm - bloom syndrome, recq helicase-like, Snca - synuclein, alpha (non a4 component of amyl…
GO:0045132	meiotic chromosome segregation	1.08e-05	0.00307	26.34	17529	11	242	4	[Smc4 - structural maintenance of chromosomes 4, Pttg1 - pituitary tumor-transforming 1, Plk1 - polo-like kinase 1, Espl1 - extra spindle pole bodies homolog 1 (s. cerevisiae)]
GO:0010038	response to metal ion	1.26e-05	0.0035	3.12	17529	441	242	19	[Cpox - coproporphyrinogen oxidase, Alox15 - arachidonate 15-lipoxygenase, Hmbs - hydroxymethylbilane synthase, Alad - aminolevulinate dehydratase, Pklr - pyruvate kinase, liver and rbc, Car2 - carbonic anhydrase 2, Atp7b - atpase, cu++ transporting, beta polypeptide, Slc30a10 - solute carrier family 30, member 10, Cdh1 - cadherin 1, Dmtn - dematin actin binding protein, Ccnb1 - cyclin b1, Tk1 - …
GO:0051607	defense response to virus	1.31e-05	0.00357	5.57	17529	130	242	10	[Irf7 - interferon regulatory factor 7, Oas1b - 2-5 oligoadenylate synthetase 1b, Mx1 - myxovirus (influenza virus) resistance 1, Mx2 - myxovirus (influenza virus) resistance 2, Oas1a - 2'-5' oligoadenylate synthetase 1a, Ifit3 - interferon-induced protein with tetratricopeptide repeats 3, Rsad2 - radical s-adenosyl methionine domain containing 2, Cxcl10 - chemokine (c-x-c motif) ligand 10, Isg15…
GO:0033044	regulation of chromosome organization	1.85e-05	0.00496	3.63	17529	299	242	15	[Fen1 - flap structure-specific endonuclease 1, Atad2 - atpase family, aaa domain containing 2, Plk1 - polo-like kinase 1, Brca1 - breast cancer 1, early onset, Mki67 - antigen identified by monoclonal antibody ki-67, Cdc6 - cell division cycle 6, Cdt1 - chromatin licensing and dna replication factor 1, Pttg1 - pituitary tumor-transforming 1, Wdhd1 - wd repeat and hmg-box dna binding protein 1, C…
GO:0033045	regulation of sister chromatid segregation	2.03e-05	0.00534	8.31	17529	61	242	7	[Fen1 - flap structure-specific endonuclease 1, Cdt1 - chromatin licensing and dna replication factor 1, Pttg1 - pituitary tumor-transforming 1, Ccnb1 - cyclin b1, Plk1 - polo-like kinase 1, Cenpe - centromere protein e, Cdc6 - cell division cycle 6]
GO:0007088	regulation of mitotic nuclear division	2.2e-05	0.00571	5.25	17529	138	242	10	[Birc5 - baculoviral iap repeat-containing 5, Cdt1 - chromatin licensing and dna replication factor 1, Pttg1 - pituitary tumor-transforming 1, Ccnb1 - cyclin b1, Fbxo5 - f-box protein 5, Nusap1 - nucleolar and spindle associated protein 1, Plk1 - polo-like kinase 1, Mki67 - antigen identified by monoclonal antibody ki-67, Cenpe - centromere protein e, Cdc6 - cell division cycle 6]
GO:0010043	response to zinc ion	2.26e-05	0.00575	8.18	17529	62	242	7	[Slc30a10 - solute carrier family 30, member 10, Hmbs - hydroxymethylbilane synthase, Alad - aminolevulinate dehydratase, Car2 - carbonic anhydrase 2, Arg1 - arginase, liver, Atp7b - atpase, cu++ transporting, beta polypeptide, Gsta4 - glutathione s-transferase alpha 4]
GO:0048513	animal organ development	2.39e-05	0.00599	1.94	17529	1572	242	42	[Lrrc17 - leucine rich repeat containing 17, Asns - asparagine synthetase (glutamine-hydrolyzing), Bmp5 - bone morphogenetic protein 5, Add2 - adducin 2 (beta), Osr1 - odd-skipped related 1 (drosophila), Cdkl1 - cyclin-dependent kinase-like 1 (cdc2-related kinase), Asb1 - ankyrin repeat and socs box-containing 1, Eml1 - echinoderm microtubule associated protein like 1, Tal1 - t-cell acute lymphoc…
GO:0010965	regulation of mitotic sister chromatid separation	2.96e-05	0.0073	9.88	17529	44	242	6	[Cdt1 - chromatin licensing and dna replication factor 1, Pttg1 - pituitary tumor-transforming 1, Ccnb1 - cyclin b1, Plk1 - polo-like kinase 1, Cenpe - centromere protein e, Cdc6 - cell division cycle 6]
GO:0045646	regulation of erythrocyte differentiation	2.96e-05	0.00719	9.88	17529	44	242	6	[Foxo3 - forkhead box o3, Zfpm1 - zinc finger protein, multitype 1, Tal1 - t-cell acute lymphocytic leukemia 1, Fam210b - family with sequence similarity 210, member b, Gfi1b - growth factor independent 1b transcription repressor, Isg15 - isg15 ubiquitin-like modifier]
GO:0009263	deoxyribonucleotide biosynthetic process	3.18e-05	0.0076	20.7	17529	14	242	4	[LOC100359539 - ribonucleotide reductase m2 polypeptide, Rrm2 - ribonucleotide reductase m2, Cmpk2 - cytidine monophosphate (ump-cmp) kinase 2, mitochondrial, Dut - deoxyuridine triphosphatase]
GO:0030099	myeloid cell differentiation	3.61e-05	0.00848	4.5	17529	177	242	11	[Eif2ak1 - eukaryotic translation initiation factor 2 alpha kinase 1, Clec1b - c-type lectin domain family 1, member b, Klf1 - kruppel-like factor 1 (erythroid), Zfpm1 - zinc finger protein, multitype 1, Tal1 - t-cell acute lymphocytic leukemia 1, Dyrk3 - dual-specificity tyrosine-(y)-phosphorylation regulated kinase 3, Ahsp - alpha hemoglobin stabilizing protein, Tfrc - transferrin receptor, Car…
GO:0015669	gas transport	4.29e-05	0.00994	19.32	17529	15	242	4	[Hba1 - hemoglobin, alpha 1, Car2 - carbonic anhydrase 2, Rhag - rh-associated glycoprotein, Hbb - hemoglobin, beta]
GO:1905818	regulation of chromosome separation	4.92e-05	0.0112	9.05	17529	48	242	6	[Cdt1 - chromatin licensing and dna replication factor 1, Pttg1 - pituitary tumor-transforming 1, Ccnb1 - cyclin b1, Plk1 - polo-like kinase 1, Cenpe - centromere protein e, Cdc6 - cell division cycle 6]
GO:0071248	cellular response to metal ion	5.14e-05	0.0116	4.33	17529	184	242	11	[Alox15 - arachidonate 15-lipoxygenase, Cdh1 - cadherin 1, Dmtn - dematin actin binding protein, Ccnb1 - cyclin b1, Hmbs - hydroxymethylbilane synthase, Alad - aminolevulinate dehydratase, Gsn - gelsolin, Tfr2 - transferrin receptor 2, Atp7b - atpase, cu++ transporting, beta polypeptide, Gsta4 - glutathione s-transferase alpha 4, Snca - synuclein, alpha (non a4 component of amyloid precursor)]
GO:0010039	response to iron ion	5.54e-05	0.0123	8.87	17529	49	242	6	[Cpox - coproporphyrinogen oxidase, Ccnb1 - cyclin b1, Alad - aminolevulinate dehydratase, Tfr2 - transferrin receptor 2, Tfrc - transferrin receptor, Snca - synuclein, alpha (non a4 component of amyloid precursor)]
GO:0097327	response to antineoplastic agent	6.64e-05	0.0145	4.61	17529	157	242	10	[Srd5a1 - steroid-5-alpha-reductase, alpha polypeptide 1 (3-oxo-5 alpha-steroid delta 4-dehydrogenase alpha 1), Cdh1 - cadherin 1, Foxo3 - forkhead box o3, Asns - asparagine synthetase (glutamine-hydrolyzing), Pck2 - phosphoenolpyruvate carboxykinase 2 (mitochondrial), Hmbs - hydroxymethylbilane synthase, Brca1 - breast cancer 1, early onset, Fech - ferrochelatase, Arg1 - arginase, liver, Blm - b…
GO:0001556	oocyte maturation	7.32e-05	0.0158	17.04	17529	17	242	4	[Cdc25b - cell division cycle 25b, Foxo3 - forkhead box o3, Ccnb1 - cyclin b1, Fbxo5 - f-box protein 5]
GO:0033047	regulation of mitotic sister chromatid segregation	7.79e-05	0.0165	8.36	17529	52	242	6	[Cdt1 - chromatin licensing and dna replication factor 1, Pttg1 - pituitary tumor-transforming 1, Ccnb1 - cyclin b1, Plk1 - polo-like kinase 1, Cenpe - centromere protein e, Cdc6 - cell division cycle 6]
GO:0032392	DNA geometric change	8.68e-05	0.0182	8.2	17529	53	242	6	[Brip1 - brca1 interacting protein c-terminal helicase 1, Mcm6 - minichromosome maintenance complex component 6, Gins1 - gins complex subunit 1 (psf1 homolog), Mcm5 - minichromosome maintenance complex component 5, Rad54l - rad54 like (s. cerevisiae), Blm - bloom syndrome, recq helicase-like]
GO:0070887	cellular response to chemical stimulus	9.53e-05	0.0197	1.81	17529	1725	242	43	[Fancd2 - fanconi anemia, complementation group d2, Alox15 - arachidonate 15-lipoxygenase, Foxo3 - forkhead box o3, Mybl2 - myeloblastosis oncogene-like 2, Asns - asparagine synthetase (glutamine-hydrolyzing), Alad - aminolevulinate dehydratase, Osr1 - odd-skipped related 1 (drosophila), Cdc6 - cell division cycle 6, Slc30a10 - solute carrier family 30, member 10, Mkrn1 - makorin ring finger prot…
GO:0048534	hematopoietic or lymphoid organ development	9.94e-05	0.0203	4.02	17529	198	242	11	[Lrrc17 - leucine rich repeat containing 17, Klf1 - kruppel-like factor 1 (erythroid), Epb42 - erythrocyte membrane protein band 4.2, Zfpm1 - zinc finger protein, multitype 1, Mfap5 - microfibrillar associated protein 5, Tal1 - t-cell acute lymphocytic leukemia 1, RGD1563091 - similar to oef2, Spta1 - spectrin, alpha, erythrocytic 1 (elliptocytosis 2), Add2 - adducin 2 (beta), Sptb - spectrin, be…
GO:0030097	hemopoiesis	0.000104	0.0208	5.52	17529	105	242	8	[Mfap5 - microfibrillar associated protein 5, Klf1 - kruppel-like factor 1 (erythroid), Zfpm1 - zinc finger protein, multitype 1, Tal1 - t-cell acute lymphocytic leukemia 1, Spta1 - spectrin, alpha, erythrocytic 1 (elliptocytosis 2), Add2 - adducin 2 (beta), Sptb - spectrin, beta, erythrocytic, Hbb - hemoglobin, beta]
GO:0051783	regulation of nuclear division	0.000106	0.021	4.36	17529	166	242	10	[Birc5 - baculoviral iap repeat-containing 5, Cdt1 - chromatin licensing and dna replication factor 1, Pttg1 - pituitary tumor-transforming 1, Ccnb1 - cyclin b1, Fbxo5 - f-box protein 5, Nusap1 - nucleolar and spindle associated protein 1, Plk1 - polo-like kinase 1, Mki67 - antigen identified by monoclonal antibody ki-67, Cenpe - centromere protein e, Cdc6 - cell division cycle 6]
GO:1902850	microtubule cytoskeleton organization involved in mitosis	0.000109	0.0214	6.42	17529	79	242	7	[Birc5 - baculoviral iap repeat-containing 5, Eml1 - echinoderm microtubule associated protein like 1, Mybl2 - myeloblastosis oncogene-like 2, Ccnb1 - cyclin b1, Nusap1 - nucleolar and spindle associated protein 1, Cenpe - centromere protein e, Tpx2 - tpx2, microtubule-associated]
GO:0007052	mitotic spindle organization	0.000119	0.023	7.76	17529	56	242	6	[Birc5 - baculoviral iap repeat-containing 5, Eml1 - echinoderm microtubule associated protein like 1, Mybl2 - myeloblastosis oncogene-like 2, Ccnb1 - cyclin b1, Cenpe - centromere protein e, Tpx2 - tpx2, microtubule-associated]
GO:0045931	positive regulation of mitotic cell cycle	0.000128	0.0245	4.72	17529	138	242	9	[Cdc25b - cell division cycle 25b, Birc5 - baculoviral iap repeat-containing 5, Cdt1 - chromatin licensing and dna replication factor 1, Asns - asparagine synthetase (glutamine-hydrolyzing), Ccnb1 - cyclin b1, Tal1 - t-cell acute lymphocytic leukemia 1, Nusap1 - nucleolar and spindle associated protein 1, Dtl - denticleless e3 ubiquitin protein ligase homolog (drosophila), Cenpe - centromere prot…
GO:0009615	response to virus	0.00013	0.0245	3.91	17529	204	242	11	[Dhx58 - dexh (asp-glu-x-his) box polypeptide 58, Irf7 - interferon regulatory factor 7, Oas1b - 2-5 oligoadenylate synthetase 1b, Mx1 - myxovirus (influenza virus) resistance 1, Mx2 - myxovirus (influenza virus) resistance 2, Oas1a - 2'-5' oligoadenylate synthetase 1a, Ifit3 - interferon-induced protein with tetratricopeptide repeats 3, Cxcl10 - chemokine (c-x-c motif) ligand 10, Rsad2 - radical…
GO:0006782	protoporphyrinogen IX biosynthetic process	0.000138	0.0258	27.16	17529	8	242	3	[Cpox - coproporphyrinogen oxidase, Hmbs - hydroxymethylbilane synthase, Alad - aminolevulinate dehydratase]
GO:0051315	attachment of mitotic spindle microtubules to kinetochore	0.000138	0.0255	27.16	17529	8	242	3	[Cdt1 - chromatin licensing and dna replication factor 1, Cenpe - centromere protein e, Kif2c - kinesin family member 2c]
GO:2001251	negative regulation of chromosome organization	0.000143	0.0261	5.27	17529	110	242	8	[Pttg1 - pituitary tumor-transforming 1, Atad2 - atpase family, aaa domain containing 2, Plk1 - polo-like kinase 1, Gfi1b - growth factor independent 1b transcription repressor, Brca1 - breast cancer 1, early onset, Cenpe - centromere protein e, Top2a - topoisomerase (dna) ii alpha, Snca - synuclein, alpha (non a4 component of amyloid precursor)]
GO:0000281	mitotic cytokinesis	0.000146	0.0263	9.79	17529	37	242	5	[Kif4a - kinesin family member 4a, Nusap1 - nucleolar and spindle associated protein 1, Racgap1 - rac gtpase-activating protein 1, Plk1 - polo-like kinase 1, Anln - anillin, actin binding protein]
GO:0006725	cellular aromatic compound metabolic process	0.000149	0.0265	1.56	17529	2871	242	62	[Fancd2 - fanconi anemia, complementation group d2, Fen1 - flap structure-specific endonuclease 1, Rrm2 - ribonucleotide reductase m2, Mybl2 - myeloblastosis oncogene-like 2, Alad - aminolevulinate dehydratase, Orc1 - origin recognition complex, subunit 1, Ago2 - argonaute risc catalytic component 2, Osr1 - odd-skipped related 1 (drosophila), Mcm3 - minichromosome maintenance complex component 3,…
GO:0014070	response to organic cyclic compound	0.000152	0.0267	2.02	17529	1113	242	31	[Foxo3 - forkhead box o3, Asns - asparagine synthetase (glutamine-hydrolyzing), Alad - aminolevulinate dehydratase, Gclm - glutamate cysteine ligase, modifier subunit, Fam210b - family with sequence similarity 210, member b, Ccna2 - cyclin a2, Fech - ferrochelatase, Arg1 - arginase, liver, Snca - synuclein, alpha (non a4 component of amyloid precursor), Srd5a1 - steroid-5-alpha-reductase, alpha p…
GO:0046685	response to arsenic-containing substance	0.000167	0.0289	9.53	17529	38	242	5	[Cpox - coproporphyrinogen oxidase, Hmbs - hydroxymethylbilane synthase, Alad - aminolevulinate dehydratase, Slc4a1 - solute carrier family 4 (anion exchanger), member 1, Fech - ferrochelatase]
GO:1901987	regulation of cell cycle phase transition	0.000179	0.0307	3.5	17529	248	242	12	[Cdc25b - cell division cycle 25b, Birc5 - baculoviral iap repeat-containing 5, Cenpf - centromere protein f, Cdt1 - chromatin licensing and dna replication factor 1, Ccnb1 - cyclin b1, Pim1 - pim-1 oncogene, Plk1 - polo-like kinase 1, Brca1 - breast cancer 1, early onset, Dtl - denticleless e3 ubiquitin protein ligase homolog (drosophila), Cenpe - centromere protein e, Blm - bloom syndrome, recq…
GO:0015816	glycine transport	0.000205	0.0349	24.14	17529	9	242	3	[Slc6a9 - solute carrier family 6 (neurotransmitter transporter, glycine), member 9, Slc38a5 - solute carrier family 38, member 5, Slc25a38 - solute carrier family 25, member 38]
GO:0015807	L-amino acid transport	0.00021	0.0352	7.01	17529	62	242	6	[Slc6a9 - solute carrier family 6 (neurotransmitter transporter, glycine), member 9, Slc43a1 - solute carrier family 43 (amino acid system l transporter), member 1, Slc38a5 - solute carrier family 38, member 5, Slc7a5 - solute carrier family 7 (amino acid transporter light chain, l system), member 5, Slc25a38 - solute carrier family 25, member 38, Slc1a5 - solute carrier family 1 (neutral amino a…
GO:0030071	regulation of mitotic metaphase/anaphase transition	0.000213	0.0355	9.05	17529	40	242	5	[Cdt1 - chromatin licensing and dna replication factor 1, Ccnb1 - cyclin b1, Plk1 - polo-like kinase 1, Cenpe - centromere protein e, Cdc6 - cell division cycle 6]
GO:0032502	developmental process	0.000228	0.0374	1.4	17529	4561	242	88	[Fancd2 - fanconi anemia, complementation group d2, Alox15 - arachidonate 15-lipoxygenase, Mybl2 - myeloblastosis oncogene-like 2, Ago2 - argonaute risc catalytic component 2, Add2 - adducin 2 (beta), Rsad2 - radical s-adenosyl methionine domain containing 2, Osr1 - odd-skipped related 1 (drosophila), Cdhr5 - cadherin-related family member 5, Tal1 - t-cell acute lymphocytic leukemia 1, Dyrk3 - du…
GO:1902099	regulation of metaphase/anaphase transition of cell cycle	0.00024	0.0391	8.83	17529	41	242	5	[Cdt1 - chromatin licensing and dna replication factor 1, Ccnb1 - cyclin b1, Plk1 - polo-like kinase 1, Cenpe - centromere protein e, Cdc6 - cell division cycle 6]
GO:1903901	negative regulation of viral life cycle	0.00025	0.0402	6.79	17529	64	242	6	[Oas1b - 2-5 oligoadenylate synthetase 1b, Mx2 - myxovirus (influenza virus) resistance 2, Gsn - gelsolin, Trim59 - tripartite motif-containing 59, Rsad2 - radical s-adenosyl methionine domain containing 2, Isg15 - isg15 ubiquitin-like modifier]
GO:0002682	regulation of immune system process	0.000256	0.0408	1.99	17529	1094	242	30	[Fancd2 - fanconi anemia, complementation group d2, Dhx58 - dexh (asp-glu-x-his) box polypeptide 58, Alox15 - arachidonate 15-lipoxygenase, Lrrc17 - leucine rich repeat containing 17, Foxo3 - forkhead box o3, Itga2b - integrin, alpha 2b, Rsad2 - radical s-adenosyl methionine domain containing 2, Plcl2 - phospholipase c-like 2, Vsig4 - v-set and immunoglobulin domain containing 4, Ctsg - cathepsin…
GO:0000910	cytokinesis	0.00027	0.0425	8.62	17529	42	242	5	[Kif4a - kinesin family member 4a, Nusap1 - nucleolar and spindle associated protein 1, Racgap1 - rac gtpase-activating protein 1, Plk1 - polo-like kinase 1, Anln - anillin, actin binding protein]
GO:0061640	cytoskeleton-dependent cytokinesis	0.00027	0.0421	8.62	17529	42	242	5	[Kif4a - kinesin family member 4a, Nusap1 - nucleolar and spindle associated protein 1, Racgap1 - rac gtpase-activating protein 1, Plk1 - polo-like kinase 1, Anln - anillin, actin binding protein]
GO:1901576	organic substance biosynthetic process	0.000288	0.0444	1.59	17529	2455	242	54	[Alox15 - arachidonate 15-lipoxygenase, Fen1 - flap structure-specific endonuclease 1, Rrm2 - ribonucleotide reductase m2, Mybl2 - myeloblastosis oncogene-like 2, Alad - aminolevulinate dehydratase, Orc1 - origin recognition complex, subunit 1, Ago2 - argonaute risc catalytic component 2, Osr1 - odd-skipped related 1 (drosophila), Cdt1 - chromatin licensing and dna replication factor 1, Pttg1 - p…
GO:0009058	biosynthetic process	0.000291	0.0445	1.58	17529	2516	242	55	[Alox15 - arachidonate 15-lipoxygenase, Fen1 - flap structure-specific endonuclease 1, Rrm2 - ribonucleotide reductase m2, Mybl2 - myeloblastosis oncogene-like 2, Alad - aminolevulinate dehydratase, Orc1 - origin recognition complex, subunit 1, Ago2 - argonaute risc catalytic component 2, Osr1 - odd-skipped related 1 (drosophila), Cdt1 - chromatin licensing and dna replication factor 1, Pttg1 - p…
GO:0051716	cellular response to stimulus	0.000291	0.0441	1.57	17529	2576	242	56	[Fancd2 - fanconi anemia, complementation group d2, Alox15 - arachidonate 15-lipoxygenase, Fen1 - flap structure-specific endonuclease 1, Mybl2 - myeloblastosis oncogene-like 2, Alad - aminolevulinate dehydratase, Osr1 - odd-skipped related 1 (drosophila), Helq - helicase, polq-like, Pttg1 - pituitary tumor-transforming 1, Fam210b - family with sequence similarity 210, member b, Has1 - hyaluronan…
GO:0090329	regulation of DNA-dependent DNA replication	0.000302	0.0453	8.42	17529	43	242	5	[Cdt1 - chromatin licensing and dna replication factor 1, E2f8 - e2f transcription factor 8, Bmp5 - bone morphogenetic protein 5, Blm - bloom syndrome, recq helicase-like, Dscc1 - dna replication and sister chromatid cohesion 1]
GO:1901990	regulation of mitotic cell cycle phase transition	0.000303	0.045	3.54	17529	225	242	11	[Birc5 - baculoviral iap repeat-containing 5, Cenpf - centromere protein f, Cdt1 - chromatin licensing and dna replication factor 1, Ccnb1 - cyclin b1, Pim1 - pim-1 oncogene, Plk1 - polo-like kinase 1, Brca1 - breast cancer 1, early onset, Dtl - denticleless e3 ubiquitin protein ligase homolog (drosophila), Cenpe - centromere protein e, Blm - bloom syndrome, recq helicase-like, Cdc6 - cell divisi…
GO:0046483	heterocycle metabolic process	0.000308	0.0453	1.54	17529	2824	242	60	[Fancd2 - fanconi anemia, complementation group d2, Fen1 - flap structure-specific endonuclease 1, Rrm2 - ribonucleotide reductase m2, Mybl2 - myeloblastosis oncogene-like 2, Alad - aminolevulinate dehydratase, Orc1 - origin recognition complex, subunit 1, Ago2 - argonaute risc catalytic component 2, Osr1 - odd-skipped related 1 (drosophila), Mcm3 - minichromosome maintenance complex component 3,…
GO:0010033	response to organic substance	0.000316	0.046	1.58	17529	2524	242	55	[Alox15 - arachidonate 15-lipoxygenase, Mybl2 - myeloblastosis oncogene-like 2, Alad - aminolevulinate dehydratase, Osr1 - odd-skipped related 1 (drosophila), Cdt1 - chromatin licensing and dna replication factor 1, Slc4a1 - solute carrier family 4 (anion exchanger), member 1, Fam210b - family with sequence similarity 210, member b, Mgst3 - microsomal glutathione s-transferase 3, Has1 - hyalurona…
GO:0032508	DNA duplex unwinding	0.000337	0.0486	8.23	17529	44	242	5	[Mcm6 - minichromosome maintenance complex component 6, Brip1 - brca1 interacting protein c-terminal helicase 1, Gins1 - gins complex subunit 1 (psf1 homolog), Mcm5 - minichromosome maintenance complex component 5, Blm - bloom syndrome, recq helicase-like]
GO:0006807	nitrogen compound metabolic process	0.000354	0.0506	1.31	17529	5959	242	108	[Fen1 - flap structure-specific endonuclease 1, Mybl2 - myeloblastosis oncogene-like 2, Alad - aminolevulinate dehydratase, Cdca3 - cell division cycle associated 3, Mcm3 - minichromosome maintenance complex component 3, Cdt1 - chromatin licensing and dna replication factor 1, Wdhd1 - wd repeat and hmg-box dna binding protein 1, Dyrk3 - dual-specificity tyrosine-(y)-phosphorylation regulated kina…
GO:0030261	chromosome condensation	0.000357	0.0505	11.59	17529	25	242	4	[Smc4 - structural maintenance of chromosomes 4, Nusap1 - nucleolar and spindle associated protein 1, Top2a - topoisomerase (dna) ii alpha, Ncapd2 - non-smc condensin i complex, subunit d2]
GO:0045648	positive regulation of erythrocyte differentiation	0.000357	0.05	11.59	17529	25	242	4	[Foxo3 - forkhead box o3, Tal1 - t-cell acute lymphocytic leukemia 1, Fam210b - family with sequence similarity 210, member b, Isg15 - isg15 ubiquitin-like modifier]
GO:0006796	phosphate-containing compound metabolic process	0.000364	0.0505	1.76	17529	1607	242	39	[Alox15 - arachidonate 15-lipoxygenase, Rrm2 - ribonucleotide reductase m2, Dupd1 - dual specificity phosphatase and pro isomerase domain containing 1, Plk1 - polo-like kinase 1, Pask - pas domain containing serine/threonine kinase, Osr1 - odd-skipped related 1 (drosophila), Cdkl1 - cyclin-dependent kinase-like 1 (cdc2-related kinase), Bpgm - 2,3-bisphosphoglycerate mutase, Clec1b - c-type lectin…
GO:0006260	DNA replication	0.000368	0.0507	5.28	17529	96	242	7	[Fen1 - flap structure-specific endonuclease 1, Cdt1 - chromatin licensing and dna replication factor 1, Rrm2 - ribonucleotide reductase m2, Orc1 - origin recognition complex, subunit 1, Gins1 - gins complex subunit 1 (psf1 homolog), Blm - bloom syndrome, recq helicase-like, Baz1a - bromodomain adjacent to zinc finger domain, 1a]
GO:1901360	organic cyclic compound metabolic process	0.000437	0.0596	1.5	17529	3046	242	63	[Fancd2 - fanconi anemia, complementation group d2, Fen1 - flap structure-specific endonuclease 1, Rrm2 - ribonucleotide reductase m2, Mybl2 - myeloblastosis oncogene-like 2, Alad - aminolevulinate dehydratase, Orc1 - origin recognition complex, subunit 1, Ago2 - argonaute risc catalytic component 2, Osr1 - odd-skipped related 1 (drosophila), Mcm3 - minichromosome maintenance complex component 3,…
GO:0044249	cellular biosynthetic process	0.000442	0.0598	1.58	17529	2378	242	52	[Alox15 - arachidonate 15-lipoxygenase, Fen1 - flap structure-specific endonuclease 1, Mybl2 - myeloblastosis oncogene-like 2, Rrm2 - ribonucleotide reductase m2, Alad - aminolevulinate dehydratase, Orc1 - origin recognition complex, subunit 1, Ago2 - argonaute risc catalytic component 2, Osr1 - odd-skipped related 1 (drosophila), Cdt1 - chromatin licensing and dna replication factor 1, Pttg1 - p…
GO:0071310	cellular response to organic substance	0.000451	0.0604	1.79	17529	1457	242	36	[Alox15 - arachidonate 15-lipoxygenase, Foxo3 - forkhead box o3, Mybl2 - myeloblastosis oncogene-like 2, Asns - asparagine synthetase (glutamine-hydrolyzing), Alad - aminolevulinate dehydratase, Osr1 - odd-skipped related 1 (drosophila), Cdc6 - cell division cycle 6, Slc30a10 - solute carrier family 30, member 10, Mkrn1 - makorin ring finger protein 1, Ctsg - cathepsin g, Gclm - glutamate cystein…
GO:1901700	response to oxygen-containing compound	0.000456	0.0606	1.72	17529	1682	242	40	[Foxo3 - forkhead box o3, Asns - asparagine synthetase (glutamine-hydrolyzing), Alad - aminolevulinate dehydratase, Osr1 - odd-skipped related 1 (drosophila), Cdc6 - cell division cycle 6, Slc30a10 - solute carrier family 30, member 10, Cdt1 - chromatin licensing and dna replication factor 1, Ctsg - cathepsin g, Gclm - glutamate cysteine ligase, modifier subunit, Fam210b - family with sequence si…
GO:0007076	mitotic chromosome condensation	0.000521	0.0687	18.11	17529	12	242	3	[Smc4 - structural maintenance of chromosomes 4, Nusap1 - nucleolar and spindle associated protein 1, Ncapd2 - non-smc condensin i complex, subunit d2]
GO:0007129	synapsis	0.000559	0.0731	10.35	17529	28	242	4	[Ccne1 - cyclin e1, Brip1 - brca1 interacting protein c-terminal helicase 1, Fancd2 - fanconi anemia, complementation group d2, Ccne2 - cyclin e2]
GO:0060375	regulation of mast cell differentiation	0.000564	0.0731	48.29	17529	3	242	2	[Zfpm1 - zinc finger protein, multitype 1, Tal1 - t-cell acute lymphocytic leukemia 1]
GO:0009636	response to toxic substance	0.000627	0.0805	2.31	17529	595	242	19	[Brip1 - brca1 interacting protein c-terminal helicase 1, Srd5a1 - steroid-5-alpha-reductase, alpha polypeptide 1 (3-oxo-5 alpha-steroid delta 4-dehydrogenase alpha 1), Cpox - coproporphyrinogen oxidase, Asns - asparagine synthetase (glutamine-hydrolyzing), Hmbs - hydroxymethylbilane synthase, Alad - aminolevulinate dehydratase, Plk1 - polo-like kinase 1, Hba1 - hemoglobin, alpha 1, Ccne1 - cycli…
GO:0006950	response to stress	0.00064	0.0815	1.53	17529	2597	242	55	[Fancd2 - fanconi anemia, complementation group d2, Alox15 - arachidonate 15-lipoxygenase, Fen1 - flap structure-specific endonuclease 1, Alad - aminolevulinate dehydratase, Rsad2 - radical s-adenosyl methionine domain containing 2, Osr1 - odd-skipped related 1 (drosophila), Fstl1 - follistatin-like 1, Helq - helicase, polq-like, Mx1 - myxovirus (influenza virus) resistance 1, Pttg1 - pituitary t…
GO:0009262	deoxyribonucleotide metabolic process	0.000642	0.0811	9.99	17529	29	242	4	[LOC100359539 - ribonucleotide reductase m2 polypeptide, Rrm2 - ribonucleotide reductase m2, Cmpk2 - cytidine monophosphate (ump-cmp) kinase 2, mitochondrial, Dut - deoxyuridine triphosphatase]
GO:0034641	cellular nitrogen compound metabolic process	0.000649	0.0813	1.46	17529	3216	242	65	[Fancd2 - fanconi anemia, complementation group d2, Fen1 - flap structure-specific endonuclease 1, Rrm2 - ribonucleotide reductase m2, Mybl2 - myeloblastosis oncogene-like 2, Alad - aminolevulinate dehydratase, Orc1 - origin recognition complex, subunit 1, Ago2 - argonaute risc catalytic component 2, Osr1 - odd-skipped related 1 (drosophila), Mcm3 - minichromosome maintenance complex component 3,…
GO:0048468	cell development	0.000657	0.0817	2.19	17529	694	242	21	[Brip1 - brca1 interacting protein c-terminal helicase 1, Prdm8 - pr domain containing 8, Hoxd9 - homeo box d9, Zfpm1 - zinc finger protein, multitype 1, Ank1 - ankyrin 1, erythrocytic, Hba1 - hemoglobin, alpha 1, Bmp5 - bone morphogenetic protein 5, Osr1 - odd-skipped related 1 (drosophila), Bpgm - 2,3-bisphosphoglycerate mutase, Rhd - rh blood group, d antigen, Cdh1 - cadherin 1, Dmtn - dematin…
GO:2000105	positive regulation of DNA-dependent DNA replication	0.000671	0.0827	16.72	17529	13	242	3	[Cdt1 - chromatin licensing and dna replication factor 1, E2f8 - e2f transcription factor 8, Bmp5 - bone morphogenetic protein 5]
GO:0009605	response to external stimulus	0.000672	0.0821	1.73	17529	1545	242	37	[Dhx58 - dexh (asp-glu-x-his) box polypeptide 58, Foxo3 - forkhead box o3, Asns - asparagine synthetase (glutamine-hydrolyzing), Alad - aminolevulinate dehydratase, Rsad2 - radical s-adenosyl methionine domain containing 2, Ppl - periplakin, Fstl1 - follistatin-like 1, Ctsg - cathepsin g, Mx1 - myxovirus (influenza virus) resistance 1, Gclm - glutamate cysteine ligase, modifier subunit, Oas1a - 2…
GO:0006323	DNA packaging	0.000732	0.0889	9.66	17529	30	242	4	[Smc4 - structural maintenance of chromosomes 4, Nusap1 - nucleolar and spindle associated protein 1, Top2a - topoisomerase (dna) ii alpha, Ncapd2 - non-smc condensin i complex, subunit d2]
GO:0015893	drug transport	0.000734	0.0884	4.14	17529	140	242	8	[Slc6a9 - solute carrier family 6 (neurotransmitter transporter, glycine), member 9, Hba1 - hemoglobin, alpha 1, Car2 - carbonic anhydrase 2, Rhag - rh-associated glycoprotein, Slc38a5 - solute carrier family 38, member 5, Slc25a38 - solute carrier family 25, member 38, Slc1a5 - solute carrier family 1 (neutral amino acid transporter), member 5, Hbb - hemoglobin, beta]
GO:0051258	protein polymerization	0.000737	0.088	6.96	17529	52	242	5	[Mx1 - myxovirus (influenza virus) resistance 1, Mx2 - myxovirus (influenza virus) resistance 2, Fbxo5 - f-box protein 5, Gsn - gelsolin, Gas7 - growth arrest specific 7]
GO:1901293	nucleoside phosphate biosynthetic process	0.000774	0.0917	3.7	17529	176	242	9	[Rrm2 - ribonucleotide reductase m2, LOC100359539 - ribonucleotide reductase m2 polypeptide, Cmpk2 - cytidine monophosphate (ump-cmp) kinase 2, mitochondrial, Tk1 - thymidine kinase 1, soluble, Oas1a - 2'-5' oligoadenylate synthetase 1a, Pklr - pyruvate kinase, liver and rbc, LOC314140 - ribose-phosphate pyrophosphokinase i -like, Dut - deoxyuridine triphosphatase, Oasl2 - 2'-5' oligoadenylate sy…
GO:0051303	establishment of chromosome localization	0.000805	0.0946	6.83	17529	53	242	5	[Birc5 - baculoviral iap repeat-containing 5, Cenpf - centromere protein f, Ccnb1 - cyclin b1, Cenpe - centromere protein e, Kif2c - kinesin family member 2c]
GO:0006793	phosphorus metabolic process	0.000805	0.094	1.69	17529	1674	242	39	[Alox15 - arachidonate 15-lipoxygenase, Rrm2 - ribonucleotide reductase m2, Dupd1 - dual specificity phosphatase and pro isomerase domain containing 1, Plk1 - polo-like kinase 1, Pask - pas domain containing serine/threonine kinase, Osr1 - odd-skipped related 1 (drosophila), Cdkl1 - cyclin-dependent kinase-like 1 (cdc2-related kinase), Bpgm - 2,3-bisphosphoglycerate mutase, Clec1b - c-type lectin…
GO:1902749	regulation of cell cycle G2/M phase transition	0.000834	0.0966	5.43	17529	80	242	6	[Cdc25b - cell division cycle 25b, Cenpf - centromere protein f, Ccnb1 - cyclin b1, Brca1 - breast cancer 1, early onset, Dtl - denticleless e3 ubiquitin protein ligase homolog (drosophila), Blm - bloom syndrome, recq helicase-like]
GO:0006865	amino acid transport	0.000835	0.096	4.61	17529	110	242	7	[Slc6a9 - solute carrier family 6 (neurotransmitter transporter, glycine), member 9, Slc43a1 - solute carrier family 43 (amino acid system l transporter), member 1, Slc16a10 - solute carrier family 16 (aromatic amino acid transporter), member 10, Slc38a5 - solute carrier family 38, member 5, Slc7a5 - solute carrier family 7 (amino acid transporter light chain, l system), member 5, Slc25a38 - solu…
GO:0048525	negative regulation of viral process	0.00089	0.102	5.37	17529	81	242	6	[Oas1b - 2-5 oligoadenylate synthetase 1b, Mx2 - myxovirus (influenza virus) resistance 2, Gsn - gelsolin, Trim59 - tripartite motif-containing 59, Rsad2 - radical s-adenosyl methionine domain containing 2, Isg15 - isg15 ubiquitin-like modifier]
GO:0042221	response to chemical	0.000903	0.102	1.47	17529	3005	242	61	[Fancd2 - fanconi anemia, complementation group d2, Alox15 - arachidonate 15-lipoxygenase, Mybl2 - myeloblastosis oncogene-like 2, Alad - aminolevulinate dehydratase, Plk1 - polo-like kinase 1, Osr1 - odd-skipped related 1 (drosophila), Cdt1 - chromatin licensing and dna replication factor 1, Fam210b - family with sequence similarity 210, member b, Slc4a1 - solute carrier family 4 (anion exchange…
GO:0044237	cellular metabolic process	0.000904	0.102	1.27	17529	6374	242	112	[Fen1 - flap structure-specific endonuclease 1, Mybl2 - myeloblastosis oncogene-like 2, Alad - aminolevulinate dehydratase, Cdca3 - cell division cycle associated 3, Ca1 - carbonic anhydrase i, Mcm3 - minichromosome maintenance complex component 3, Eif4e3 - eukaryotic translation initiation factor 4e family member 3, Cdt1 - chromatin licensing and dna replication factor 1, Wdhd1 - wd repeat and h…
GO:1901362	organic cyclic compound biosynthetic process	0.000956	0.107	1.7	17529	1575	242	37	[Cpox - coproporphyrinogen oxidase, Foxo3 - forkhead box o3, Rrm2 - ribonucleotide reductase m2, Mybl2 - myeloblastosis oncogene-like 2, Alad - aminolevulinate dehydratase, Ago2 - argonaute risc catalytic component 2, Osr1 - odd-skipped related 1 (drosophila), E2f2 - e2f transcription factor 2, LOC100359539 - ribonucleotide reductase m2 polypeptide, Pttg1 - pituitary tumor-transforming 1, Oas1a -…
GO:0048856	anatomical structure development	0.000974	0.108	1.45	17529	3139	242	63	[Alox15 - arachidonate 15-lipoxygenase, Add2 - adducin 2 (beta), Osr1 - odd-skipped related 1 (drosophila), Tal1 - t-cell acute lymphocytic leukemia 1, Slc7a5 - solute carrier family 7 (amino acid transporter light chain, l system), member 5, Ly6e - lymphocyte antigen 6 complex, locus e, Prdm8 - pr domain containing 8, Hoxd9 - homeo box d9, Nfe2 - nuclear factor, erythroid derived 2, Zfpm1 - zinc…
GO:0002252	immune effector process	0.000976	0.107	2.75	17529	342	242	13	[Oas1b - 2-5 oligoadenylate synthetase 1b, Rsad2 - radical s-adenosyl methionine domain containing 2, Plcl2 - phospholipase c-like 2, Irf7 - interferon regulatory factor 7, Mx1 - myxovirus (influenza virus) resistance 1, Ctsg - cathepsin g, Mx2 - myxovirus (influenza virus) resistance 2, Oas1a - 2'-5' oligoadenylate synthetase 1a, Ifit3 - interferon-induced protein with tetratricopeptide repeats …
